# Supplementary material for: Dissecting the phenotypic and functional heterogeneity of mouse inflammatory osteoclasts by the expression of Cx3cr1
Source: eLife. 2020 May 13;9:e54493. doi: 10.7554/eLife.54493 (PMC7220377; doi:10.7554/eLife.54493)
Supplement: Source data 1. — Raw counts (HTseq) per gene and per sample from the RNAseq analysis of Cx3cr1+ and Cx3cr1neg i-OCLs from WT Cx3cr1GFP/+ mice and Cx3cr1+ i-OCLs from deficient Cx3cr1GFP/GFP mice. In each group, the 4 i-OCL samples have been obtained from 4 different mice. [file elife-54493-data1.xlsx]

## Sheet: RawCounts_HTSeq
RawCounts_HTSeq
Gene	Cx3cr1+ OCLs from GFP/+ mice				Cx3cr1neg OCLs from GFP/+ mice				Cx3cr1+ OCLs from GFP/GFP mice
	sample 1	sample 2	sample 3	sample 4	sample 1	sample 2	sample 3	sample 4	sample 1	sample 2	sample 3	sample 4
0610006L08Rik	0	0	0	0	0	0	0	0	0	0	0	0
0610007P14Rik	190	135	233	83	149	192	199	16	219	148	259	162
0610009B22Rik	169	141	158	72	206	256	203	42	240	113	141	143
0610009E02Rik	12	9	5	1	8	12	4	0	6	7	6	9
0610009L18Rik	49	42	33	35	73	59	31	24	42	19	20	55
0610009O20Rik	274	298	322	168	365	559	542	121	346	243	320	268
0610010F05Rik	486	545	834	270	458	604	650	91	652	462	775	489
0610010K14Rik	28	22	13	13	39	13	19	10	13	10	19	30
0610012D04Rik	29	6	30	13	25	39	32	9	30	15	34	21
0610012G03Rik	810	676	762	387	998	1764	1315	207	1136	456	641	744
0610025J13Rik	0	0	0	0	0	0	0	0	0	0	0	0
0610030E20Rik	356	243	318	201	335	296	364	69	323	146	315	363
0610031O16Rik	0	0	0	0	0	0	0	0	0	0	0	0
0610033M10Rik	0	0	0	1	0	0	0	0	0	0	0	0
0610037L13Rik	228	227	248	124	266	231	246	46	228	202	250	215
0610038B21Rik	137	161	94	117	190	226	133	41	136	102	125	217
0610039K10Rik	29	14	18	6	25	8	15	4	33	12	21	16
0610040B10Rik	23	20	15	4	19	34	14	2	7	15	12	12
0610040F04Rik	3	1	1	1	1	3	1	0	0	0	2	1
0610040J01Rik	36	21	21	8	29	23	23	1	26	6	17	20
0610043K17Rik	15	9	11	9	11	8	5	2	16	4	14	13
1010001B22Rik	1	2	0	0	2	0	1	0	0	0	0	0
1010001N08Rik	0	0	0	0	0	0	0	0	0	0	0	0
1110002E22Rik	1	0	0	0	0	0	0	0	0	2	0	0
1110002J07Rik	84	255	386	184	76	102	88	19	155	250	406	346
1110002L01Rik	62	56	37	26	71	68	54	16	76	31	52	62
1110002O04Rik	0	0	0	0	0	0	0	0	0	0	0	0
1110003F10Rik	4	7	6	7	5	9	7	0	8	5	5	8
1110004E09Rik	65	96	99	17	53	115	86	11	71	89	96	59
1110004F10Rik	660	780	1027	313	593	1109	1134	119	979	875	1036	744
1110006O24Rik	12	8	9	7	8	14	13	4	12	9	12	10
1110008E08Rik	0	0	0	0	0	0	0	0	0	0	0	0
1110008F13Rik	507	590	597	284	682	993	709	150	747	429	562	541
1110008L16Rik	121	203	188	67	185	254	219	45	183	128	187	145
1110008P14Rik	570	807	599	225	1200	2513	2463	339	1118	432	496	535
1110012L19Rik	95	52	63	44	86	116	81	19	97	38	85	94
1110015O18Rik	0	0	0	0	0	0	0	0	0	0	0	0
1110017D15Rik	11	2	0	2	3	0	2	2	8	2	3	3
1110018N20Rik	0	0	0	0	0	0	0	0	0	0	0	0
1110019D14Rik	34	29	40	27	53	51	60	15	39	27	37	59
1110020A21Rik	12	9	4	4	8	5	2	0	2	1	3	4
1110025L11Rik	0	0	0	0	0	0	0	0	0	0	0	0
1110025M09Rik	38	19	10	12	35	11	13	6	23	17	13	28
1110028F11Rik	0	4	2	0	0	6	0	0	0	0	1	0
1110028F18Rik	0	0	0	0	0	0	0	0	0	0	0	0
1110032A03Rik	184	118	128	118	203	150	148	39	139	107	112	160
1110032F04Rik	0	0	0	2	0	0	0	3	0	0	0	6
1110034G24Rik	74	38	78	66	60	41	53	8	99	34	60	72
1110035H17Rik	25	22	4	6	19	4	5	3	16	9	7	5
1110036E04Rik	0	0	1	2	0	0	0	2	0	0	2	2
1110037F02Rik	1183	1101	1692	892	1148	1293	1345	280	1492	999	1694	1345
1110038B12Rik	364	217	260	120	323	237	275	51	282	227	308	230
1110038F14Rik	155	132	176	88	131	154	169	31	147	126	151	163
1110046J04Rik	51	30	21	30	39	30	23	10	56	14	26	54
1110051M20Rik	177	183	171	101	194	157	155	30	187	123	178	138
1110057P08Rik	0	0	0	0	0	0	0	0	0	0	0	0
1110059E24Rik	154	220	231	83	176	266	271	66	230	169	250	213
1110059G10Rik	153	113	117	50	80	154	148	17	113	120	106	123
1110060G06Rik	0	0	0	0	0	0	0	0	0	0	0	0
1110065P20Rik	27	53	45	21	48	63	36	11	44	42	38	42
1190002N15Rik	580	382	508	380	276	204	212	64	528	301	449	562
1190003K10Rik	0	0	0	0	0	0	0	0	0	0	0	0
1190005I06Rik	6	2	2	1	6	8	4	2	1	0	7	3
1190007I07Rik	49	32	44	15	68	112	100	7	53	38	49	27
1200007C13Rik	75	3	3	15	25	3	4	3	10	4	4	15
1300002E11Rik	43	16	28	6	38	22	35	11	47	23	21	19
1300017J02Rik	3	0	5	0	2	3	2	0	2	0	3	1
1500002C15Rik	11	17	9	19	13	10	15	5	17	1	15	27
1500002F19Rik	6	7	5	0	7	3	3	0	12	3	9	6
1500004A13Rik	73	57	107	18	102	81	112	6	87	48	83	51
1500005C15Rik	28	13	29	42	29	14	13	12	42	17	32	50
1500009C09Rik	0	0	0	0	0	0	0	0	0	0	0	0
1500009L16Rik	0	0	0	0	0	0	0	0	0	0	0	0
1500011B03Rik	80	61	69	53	64	73	35	14	70	59	47	80
1500011K16Rik	169	152	233	46	119	263	182	18	241	199	177	117
1500012K07Rik	0	0	0	0	0	0	0	0	0	0	0	0
1500015A07Rik	68	50	53	51	70	84	65	17	75	58	60	144
1500015L24Rik	0	1	0	0	0	0	0	0	0	0	0	0
1500015O10Rik	1	1	1	5	1	7	1	2	3	2	1	0
1500017E21Rik	14	21	26	7	15	18	18	1	15	17	8	12
1500026H17Rik	4	1	2	0	3	4	4	0	4	0	3	3
1500035N22Rik	21	28	26	14	45	51	25	3	25	11	21	14
1520401A03Rik	1	0	1	0	3	0	0	0	4	2	0	2
1600002D24Rik	11	7	8	3	6	5	6	1	8	8	8	13
1600002H07Rik	128	254	168	98	137	316	132	42	143	198	193	194
1600002K03Rik	71	75	110	37	77	111	90	20	86	54	78	79
1600010M07Rik	12	7	14	3	7	4	8	4	8	9	15	12
1600012H06Rik	419	318	365	256	484	661	596	136	539	261	360	464
1600012P17Rik	0	0	0	0	0	0	0	0	0	0	0	0
1600014C10Rik	205	120	160	137	233	217	255	66	240	114	113	206
1600014C23Rik	3	0	1	0	1	2	0	0	2	0	1	1
1600015I10Rik	1	0	0	0	0	0	0	0	0	0	0	0
1600017P15Rik	1	5	2	4	1	0	0	0	0	1	1	0
1600019K03Rik	0	0	0	0	0	1	0	0	0	0	0	0
1600020E01Rik	136	119	115	100	164	133	86	33	108	92	130	167
1600023N17Rik	15	6	7	0	13	3	5	0	7	5	6	3
1600025M17Rik	0	0	0	0	0	0	0	0	0	0	0	0
1600029O15Rik	4	4	0	0	6	0	2	0	3	1	1	2
1700001C02Rik	0	0	0	0	0	0	0	0	0	0	0	0
1700001C19Rik	11	11	5	5	11	10	10	2	4	1	9	5
1700001D01Rik	13	15	10	5	31	52	22	10	21	5	17	19
1700001F09Rik	0	0	0	0	0	0	0	0	0	0	0	0
1700001G01Rik	0	0	0	0	0	0	0	0	0	0	0	1
1700001G11Rik	4	5	5	1	3	2	2	2	3	0	4	1
1700001G17Rik	8	3	6	0	7	4	3	0	3	0	5	7
1700001J03Rik	7	2	3	0	10	3	5	2	5	3	4	6
1700001J04Rik	0	0	0	0	0	0	0	0	0	0	0	0
1700001J11Rik	1	1	0	2	0	0	0	0	3	1	1	4
1700001K19Rik	116	98	36	25	49	51	25	5	62	24	39	103
1700001L05Rik	42	39	39	27	19	17	23	5	34	35	40	27
1700001L19Rik	1	0	0	0	0	0	0	0	0	0	0	0
1700001N15Rik	0	0	0	0	0	0	0	0	0	0	0	0
1700001O22Rik	11	4	7	4	12	9	12	2	11	2	8	3
1700001P01Rik	5	2	4	7	5	0	0	0	3	3	1	5
1700003C15Rik	0	0	0	0	0	0	0	0	0	0	0	0
1700003D09Rik	1	0	0	0	2	0	0	0	0	0	0	2
1700003E16Rik	9	9	11	5	14	12	28	2	7	1	4	7
1700003E24Rik	0	0	0	0	0	0	0	0	0	0	0	0
1700003F12Rik	27	16	12	6	42	38	21	8	25	12	14	17
1700003G13Rik	0	0	0	3	0	0	0	0	0	0	0	3
1700003G18Rik	1	1	0	0	2	0	0	0	0	0	1	0
1700003H04Rik	0	0	0	0	0	0	0	0	0	0	0	0
1700003I16Rik	3	0	0	0	5	2	0	0	0	0	3	3
1700003I22Rik	0	0	0	0	0	0	0	0	0	0	0	0
1700003L19Rik	0	0	0	0	0	0	0	0	0	0	0	0
1700003M07Rik	1	0	0	0	0	0	0	0	0	0	0	0
1700003N22Rik	70	98	77	69	63	150	61	13	121	91	76	88
1700003P14Rik	0	0	0	0	0	0	0	0	0	0	0	0
1700006A11Rik	0	0	0	0	0	0	0	0	0	0	0	0
1700006E09Rik	30	15	19	13	26	16	11	1	23	13	21	16
1700006F04Rik	0	0	0	0	0	0	0	0	0	0	0	0
1700006H21Rik	0	0	0	0	0	1	1	0	0	0	0	0
1700006J14Rik	2	2	0	0	1	5	4	1	2	1	0	7
1700006P03Rik	0	0	0	0	0	0	0	0	0	0	0	0
1700007B14Rik	0	0	0	0	0	0	0	0	0	0	0	0
1700007E05Rik	0	0	0	0	0	0	0	0	0	0	0	0
1700007F19Rik	0	0	0	0	0	0	0	0	0	0	0	0
1700007G11Rik	0	0	0	0	0	0	0	0	0	0	0	0
1700007J10Rik	20	37	16	24	20	31	33	16	28	17	29	54
1700007K09Rik	5	4	11	1	2	6	4	0	7	5	2	4
1700007K13Rik	1	1	3	5	0	1	0	0	0	0	1	1
1700007L15Rik	13	11	5	3	12	14	21	4	15	12	15	12
1700007M16Rik	0	0	0	0	0	0	0	0	0	0	0	0
1700007P06Rik	0	0	0	0	0	0	0	0	0	0	0	0
1700008A23Rik	1	8	1	0	10	8	4	3	2	1	3	2
1700008B11Rik	87	49	56	23	85	53	53	10	48	37	64	43
1700008H02Rik	0	0	0	0	0	0	0	0	0	0	0	0
1700008J07Rik	44	51	46	36	45	56	53	18	43	33	64	52
1700008K24Rik	0	0	0	0	0	0	0	0	0	0	0	0
1700008O03Rik	2	0	0	1	0	0	2	0	1	0	0	0
1700008P02Rik	0	0	0	0	0	0	0	0	0	0	0	0
1700009C05Rik	0	0	0	0	0	0	0	0	0	0	1	0
1700009J07Rik	0	0	0	0	1	0	0	0	0	0	0	0
1700009N14Rik	0	0	0	0	0	0	0	0	0	0	0	0
1700010B08Rik	1	0	0	2	1	1	1	0	1	0	1	1
1700010B13Rik	4	4	0	0	1	5	1	0	0	0	0	1
1700010D01Rik	0	0	0	0	0	0	0	0	0	0	0	0
1700010H22Rik	0	0	0	0	0	2	0	0	0	0	1	0
1700010I02Rik	0	0	0	0	0	0	0	0	0	0	0	0
1700010I14Rik	50	23	41	16	47	36	40	8	71	33	32	55
1700010J16Rik	0	0	0	0	0	0	0	0	0	0	0	0
1700010K23Rik	0	0	0	0	0	0	0	0	0	0	0	0
1700010K24Rik	0	0	2	0	1	0	0	0	2	0	1	0
1700010L04Rik	2	0	1	0	2	1	0	0	1	0	0	2
1700010N08Rik	0	0	0	0	0	0	0	0	0	0	0	0
1700011B04Rik	0	0	0	0	0	0	0	0	1	1	0	0
1700011C11Rik	0	0	0	0	0	0	0	0	0	0	0	0
1700011D18Rik	0	1	0	0	0	0	0	0	0	1	0	0
1700011E24Rik	13	2	4	0	5	6	4	0	9	8	5	6
1700011H14Rik	1	1	0	2	0	2	3	2	3	1	2	0
1700011I03Rik	0	0	0	0	0	0	0	0	0	0	0	0
1700011L22Rik	21	19	21	1	50	59	55	7	40	5	22	8
1700011M02Rik	0	0	0	0	0	0	0	0	0	0	0	0
1700012A03Rik	0	0	0	0	0	0	0	0	1	0	0	0
1700012B07Rik	0	0	0	0	0	0	0	0	0	0	0	0
1700012B09Rik	4	10	8	4	8	31	48	1	6	14	13	13
1700012C08Rik	0	0	0	0	0	0	0	0	0	0	0	0
1700012C14Rik	0	0	0	0	0	0	0	0	0	0	0	0
1700012D16Rik	0	0	0	0	0	0	0	0	0	0	0	0
1700012E03Rik	1	0	0	0	0	0	0	0	0	0	0	0
1700012I11Rik	0	0	0	0	0	0	0	0	0	0	0	0
1700012J22Rik	0	0	0	0	0	0	0	0	0	0	0	0
1700012L04Rik	0	0	0	0	0	0	0	0	0	2	0	0
1700012P22Rik	0	0	0	0	0	0	0	0	0	0	0	0
1700013A02Rik	12	3	0	0	10	1	3	2	1	0	1	3
1700013D24Rik	0	0	0	0	0	0	0	0	0	0	0	0
1700013F07Rik	2	0	0	1	2	2	3	0	1	3	0	2
1700013G24Rik	0	0	0	0	0	0	0	0	0	0	0	0
1700013H16Rik	0	0	0	0	0	0	0	0	0	0	0	0
1700013M08Rik	16	10	24	9	10	2	8	1	29	17	14	9
1700013N06Rik	0	0	0	0	0	0	0	0	0	0	0	0
1700014D04Rik	2	2	1	0	4	3	2	0	4	2	0	3
1700014F14Rik	0	0	0	0	0	0	0	0	0	0	0	0
1700015C17Rik	0	0	0	0	0	0	0	0	0	1	0	0
1700015E13Rik	31	12	37	5	59	83	59	18	43	10	26	14
1700015F17Rik	0	0	0	0	0	0	1	0	0	0	0	0
1700015G11Rik	0	0	0	0	0	0	0	2	0	0	0	0
1700015O11Rik	2	2	2	1	0	2	0	0	1	0	2	4
1700016A09Rik	46	41	20	26	31	37	14	5	26	14	23	31
1700016B15Rik	5	10	10	8	5	15	4	2	7	6	9	16
1700016C15Rik	4	6	1	8	5	8	6	0	4	4	0	3
1700016D06Rik	0	0	1	0	0	0	0	0	0	0	0	0
1700016D08Rik	0	0	0	0	0	0	0	0	0	0	0	0
1700016F12Rik	0	0	0	0	0	0	0	0	0	0	0	0
1700016G14Rik	1	0	1	1	0	1	1	1	3	0	2	5
1700016G22Rik	3	12	4	53	5	19	1	9	7	9	3	76
1700016H13Rik	0	2	1	0	3	0	3	0	1	0	1	1
1700016K19Rik	0	0	0	0	1	0	0	0	0	0	0	0
1700016L21Rik	0	0	0	0	1	0	0	0	0	0	1	0
1700016P03Rik	41	4	14	13	18	6	6	4	11	6	6	14
1700016P04Rik	0	0	0	0	0	0	0	0	0	0	0	0
1700017B05Rik	2134	2547	2581	1610	2074	3308	2463	735	2450	1767	2948	2059
1700017D01Rik	0	3	0	1	0	0	0	0	0	1	0	3
1700017G19Rik	10	7	3	2	17	13	12	2	6	1	3	8
1700017I07Rik	0	0	0	0	0	0	0	0	0	0	0	0
1700017J07Rik	0	0	0	0	0	1	1	0	1	0	0	2
1700017L05Rik	0	0	0	0	0	0	0	0	0	0	0	0
1700017N19Rik	0	0	0	0	0	0	0	0	0	2	0	0
1700018A04Rik	3	0	0	0	0	1	1	0	0	0	0	0
1700018A14Rik	4	3	3	3	2	1	3	2	1	1	10	3
1700018B08Rik	4	0	0	0	0	0	0	0	1	0	0	0
1700018B24Rik	0	0	0	0	0	0	0	0	0	0	0	0
1700018C11Rik	2	0	1	0	3	4	2	0	1	0	0	0
1700018F24Rik	0	0	0	0	0	0	0	0	1	0	0	0
1700018L02Rik	18	20	10	16	34	24	21	6	14	12	7	16
1700018M17Rik	3	0	1	0	2	4	0	0	1	1	0	0
1700019A02Rik	0	0	0	0	3	0	0	0	0	1	2	0
1700019A23Rik	0	0	0	0	0	0	0	0	0	0	0	0
1700019B03Rik	1	3	0	0	0	0	1	1	0	0	0	0
1700019B21Rik	0	0	0	0	0	0	0	0	0	0	0	0
1700019D03Rik	1	0	6	0	0	0	2	0	0	0	0	0
1700019E08Rik	0	1	1	1	0	0	0	0	1	0	0	1
1700019G24Rik	0	0	0	0	0	0	0	0	0	0	0	0
1700019M22Rik	0	0	0	0	0	0	0	0	0	0	0	0
1700019N19Rik	0	0	0	0	0	0	0	0	0	0	0	1
1700019O17Rik	1	0	0	0	0	0	0	1	0	0	0	0
1700019P21Rik	0	0	0	0	0	0	0	0	0	0	0	0
1700020A23Rik	1	2	3	0	2	0	3	0	2	3	4	0
1700020D05Rik	20	6	12	6	19	11	15	0	21	7	8	16
1700020G17Rik	0	0	0	0	0	0	0	0	0	0	0	0
1700020I14Rik	2155	1687	1886	835	2431	3172	2999	538	2811	1150	1558	1697
1700020L24Rik	1	0	1	0	0	1	0	0	1	1	0	2
1700020M21Rik	1	0	0	0	0	0	0	0	1	0	0	0
1700020N01Rik	0	0	0	0	0	0	0	0	0	0	0	0
1700020N15Rik	0	0	1	0	0	0	0	0	0	0	0	0
1700020N18Rik	0	0	0	0	0	0	0	0	0	0	0	0
1700021A07Rik	0	0	0	0	0	0	0	0	0	0	0	0
1700021F05Rik	134	119	130	30	172	279	343	44	160	105	137	138
1700021F07Rik	0	0	0	0	0	0	0	0	0	0	0	0
1700021F13Rik	0	0	0	0	0	0	0	0	0	0	0	0
1700021J08Rik	3	0	5	0	3	7	3	1	0	0	0	1
1700021L23Rik	0	0	0	0	0	0	0	0	0	0	0	0
1700021N21Rik	0	1	0	0	0	0	0	0	0	0	0	0
1700021P04Rik	0	0	0	0	0	0	0	0	0	0	0	0
1700022A21Rik	0	0	0	0	0	0	0	0	0	0	0	0
1700022A22Rik	0	0	0	0	0	0	0	0	0	0	0	0
1700022E09Rik	1	2	0	0	0	0	1	0	0	1	1	0
1700022F17Rik	0	0	0	0	0	0	0	0	0	0	0	0
1700022H16Rik	0	0	0	0	0	0	0	0	0	0	0	0
1700022I11Rik	30	18	22	13	11	10	14	3	18	33	20	5
1700022N22Rik	10	1	3	6	6	1	8	3	7	0	1	8
1700023C21Rik	0	0	0	0	0	0	0	0	0	0	0	0
1700023F02Rik	0	0	0	0	0	0	0	0	0	0	0	0
1700023F06Rik	4	4	1	4	0	0	1	0	0	0	0	2
1700023G09Rik	0	0	0	0	0	0	0	0	0	0	0	0
1700023H06Rik	181	67	84	23	260	102	103	25	189	134	81	78
1700024B05Rik	0	0	0	0	0	0	0	0	0	0	0	0
1700024B18Rik	0	0	0	0	0	0	0	0	0	0	0	0
1700024G13Rik	0	0	0	0	0	0	0	0	0	0	0	0
1700024J04Rik	0	0	0	0	0	0	0	0	0	0	0	0
1700024P04Rik	0	0	0	0	0	0	0	0	0	0	0	0
1700024P16Rik	0	4	2	2	0	2	1	0	1	9	3	9
1700025A08Rik	1	0	0	1	0	1	0	0	1	0	2	1
1700025B11Rik	0	0	0	0	0	0	0	0	0	0	0	0
1700025C18Rik	0	1	1	0	1	0	0	0	0	2	0	2
1700025D23Rik	0	0	0	0	0	0	0	0	0	0	0	0
1700025F22Rik	0	0	0	0	0	0	0	1	0	0	0	0
1700025F24Rik	0	0	0	0	0	0	0	0	0	0	0	0
1700025G04Rik	569	739	865	315	980	1496	1212	205	746	550	850	650
1700025H01Rik	0	0	0	0	0	0	0	0	0	0	0	0
1700025J12Rik	0	0	0	0	0	0	0	0	0	0	0	0
1700025K24Rik	0	0	0	0	0	0	0	0	0	0	0	0
1700025M24Rik	0	0	0	0	2	0	0	0	0	0	0	0
1700025N21Rik	12	43	9	11	24	43	45	12	25	10	20	37
1700025N23Rik	80	33	85	17	42	24	16	1	81	56	65	50
1700025O08Rik	0	0	0	0	0	0	0	0	0	0	0	0
1700026D11Rik	6	0	0	0	1	1	0	0	0	1	1	2
1700026F02Rik	1	0	0	0	0	0	0	0	0	0	0	1
1700026J12Rik	0	0	0	0	0	0	0	0	0	0	0	0
1700026J14Rik	0	4	0	0	1	6	0	0	0	0	0	1
1700027A07Rik	3	3	3	0	4	1	0	0	3	3	1	1
1700027A15Rik	0	0	0	0	0	0	0	0	0	0	0	0
1700027F06Rik	0	0	0	0	0	0	0	0	0	0	0	0
1700027F09Rik	0	0	0	0	0	0	0	0	0	0	0	0
1700027H10Rik	0	0	0	0	0	0	0	0	0	0	0	0
1700027I24Rik	0	0	0	0	0	0	0	0	0	0	0	0
1700027J19Rik	5	1	1	0	5	1	1	0	3	0	4	0
1700028B04Rik	0	0	0	0	0	0	0	0	0	0	0	0
1700028D13Rik	0	0	0	0	0	0	0	0	0	0	0	0
1700028E10Rik	31	18	15	10	62	29	46	11	33	20	18	12
1700028I16Rik	4	1	1	0	1	0	0	0	0	0	0	2
1700028J19Rik	2	4	3	2	3	0	5	0	9	13	14	6
1700028K03Rik	4	2	1	5	5	4	3	1	5	3	4	1
1700028M03Rik	0	0	0	0	0	0	0	0	1	0	0	0
1700028N14Rik	17	15	13	17	15	9	9	5	15	5	15	22
1700028P14Rik	0	0	0	0	0	0	0	0	0	0	0	0
1700028P15Rik	0	0	0	0	0	0	0	0	0	0	0	0
1700029B22Rik	0	0	0	0	0	0	0	0	0	0	0	0
1700029B24Rik	0	0	0	0	1	0	0	0	0	0	0	0
1700029E06Rik	0	0	0	0	0	0	0	0	0	0	0	0
1700029F12Rik	0	0	0	0	0	0	0	0	0	0	0	0
1700029H14Rik	31	21	8	5	11	9	4	4	19	20	10	9
1700029I15Rik	52	52	40	25	35	30	60	11	52	37	59	35
1700029J03Rik	0	0	0	0	0	1	0	0	0	0	0	0
1700029J07Rik	7	4	6	1	4	0	8	0	3	1	1	5
1700029M03Rik	0	0	0	0	0	0	0	0	0	0	0	0
1700029M20Rik	2	0	0	0	1	0	1	0	0	0	0	0
1700029N11Rik	0	0	0	0	1	0	0	0	0	0	0	0
1700029P11Rik	1	0	2	0	0	0	1	0	0	1	0	0
1700030A11Rik	1	1	1	3	3	0	2	0	1	4	0	0
1700030C10Rik	2	3	6	0	2	4	4	0	3	2	5	5
1700030C12Rik	1	2	0	0	1	0	0	0	0	0	4	0
1700030C14Rik	0	0	0	0	0	0	0	0	0	0	0	0
1700030F04Rik	3	5	1	0	2	1	5	0	1	0	0	1
1700030I03Rik	0	0	0	0	0	0	0	0	0	0	0	0
1700030J22Rik	9	6	22	14	16	8	11	1	23	18	14	21
1700030K09Rik	80	53	77	35	69	61	67	14	76	55	83	51
1700030L20Rik	0	0	0	0	0	0	0	0	0	0	0	0
1700030M09Rik	1	1	1	0	2	2	0	0	2	0	0	1
1700030N03Rik	0	0	0	0	0	0	0	0	0	0	0	0
1700030N18Rik	0	0	0	0	0	0	0	0	0	0	0	1
1700030O20Rik	0	0	0	0	0	0	0	0	0	0	0	0
1700031A10Rik	0	0	0	0	1	0	0	0	0	0	0	0
1700031F05Rik	0	0	0	0	0	0	0	0	0	0	0	0
1700031F10Rik	0	0	0	0	0	0	0	0	0	0	0	0
1700031L13Rik	0	0	0	0	0	0	0	0	0	0	0	0
1700031M16Rik	0	1	0	0	0	0	0	0	0	1	0	0
1700031P21Rik	0	0	0	0	0	0	0	0	0	0	0	1
1700034B16Rik	0	0	0	0	0	0	0	0	0	0	0	0
1700034E13Rik	0	0	0	0	0	0	0	0	0	0	0	0
1700034G24Rik	0	0	0	0	0	0	0	0	0	0	0	0
1700034H15Rik	34	18	15	13	40	16	24	7	15	7	8	31
1700034I23Rik	10	7	5	2	9	16	9	2	15	4	4	7
1700034J04Rik	0	0	0	0	0	0	0	0	0	0	0	0
1700034J05Rik	47	164	79	236	47	106	45	52	101	73	92	338
1700034K08Rik	0	0	0	0	0	0	0	0	0	0	0	0
1700034O15Rik	0	0	0	0	0	0	0	0	0	0	0	0
1700034P13Rik	6	3	3	6	5	4	6	0	5	1	5	14
1700036A12Rik	0	0	0	0	0	0	0	0	0	0	0	0
1700036G14Rik	0	0	0	0	0	0	0	0	0	0	0	0
1700036O09Rik	0	0	0	0	0	0	0	0	0	0	0	0
1700037C06Rik	0	0	0	0	0	0	0	0	0	0	0	0
1700037C18Rik	50	34	42	19	44	33	37	14	59	34	34	47
1700037F24Rik	0	0	0	0	0	0	0	0	0	0	0	0
1700037H04Rik	377	285	328	233	243	233	186	39	345	269	318	305
1700039E22Rik	0	0	0	0	0	0	0	0	0	0	0	0
1700039I01Rik	0	0	0	0	0	0	0	0	0	0	0	0
1700039M10Rik	2	2	2	0	1	2	2	0	4	2	2	2
1700039M15Rik	0	3	0	5	2	0	0	0	0	2	0	2
1700040D17Rik	0	0	1	0	0	0	0	0	0	0	0	0
1700040F15Rik	0	0	0	0	0	0	0	0	0	0	0	0
1700040F17Rik	0	0	0	0	0	0	0	0	0	0	0	1
1700040K01Rik	0	0	0	0	0	0	0	0	0	0	0	0
1700040L02Rik	8	5	2	0	15	17	18	0	6	3	3	6
1700040L08Rik	6	7	5	10	4	8	4	6	4	4	10	7
1700041C23Rik	0	0	0	0	0	0	1	0	0	0	0	0
1700041G16Rik	9	9	2	6	8	8	4	0	4	5	1	9
1700041M05Rik	0	1	0	0	0	0	0	0	0	1	0	0
1700041M19Rik	0	0	0	0	0	0	0	0	0	0	0	0
1700042D02Rik	0	0	0	0	0	0	0	0	0	0	0	0
1700042G07Rik	0	0	0	0	0	3	0	0	0	0	0	1
1700042G15Rik	0	0	0	0	0	0	1	0	0	0	0	0
1700042O10Rik	1	2	2	0	0	0	0	0	0	0	0	0
1700044C05Rik	0	0	0	0	0	0	0	0	0	0	0	0
1700044K03Rik	0	0	1	0	1	0	0	0	0	0	0	0
1700045H11Rik	0	0	0	0	0	0	0	0	0	0	1	0
1700045I11Rik	0	0	0	0	0	0	0	0	0	0	0	0
1700046C09Rik	0	0	0	0	0	0	0	0	0	0	0	0
1700047A11Rik	3	17	11	1	4	9	6	0	12	3	14	8
1700047F07Rik	0	0	1	0	0	0	0	0	0	0	0	0
1700047G03Rik	2	0	1	0	4	0	1	0	7	5	1	0
1700047I17Rik2	0	0	0	0	0	0	0	0	0	0	0	1
1700047K16Rik	7	7	3	2	3	4	6	1	2	7	17	4
1700047L14Rik	0	0	0	0	0	0	0	0	0	0	0	0
1700047M11Rik	1	1	1	0	2	0	0	0	0	0	1	1
1700047N06Rik	2	1	9	0	2	6	2	0	9	2	5	5
1700048F04Rik	0	0	0	0	0	0	0	0	0	0	0	0
1700048M11Rik	0	0	0	1	0	0	1	0	0	0	0	2
1700048O20Rik	0	0	2	0	0	0	1	0	0	0	1	0
1700049E15Rik	0	0	0	0	0	0	0	0	0	0	0	0
1700049E17Rik1	0	0	0	0	0	0	0	0	0	0	0	0
1700049E17Rik2	0	0	0	0	0	0	0	0	0	0	0	0
1700049E22Rik	0	0	0	0	2	0	0	0	0	0	0	0
1700049J03Rik	1	0	0	0	0	2	0	0	1	0	1	1
1700049L16Rik	0	0	0	0	0	0	0	0	0	0	0	0
1700051A21Rik	0	0	0	0	0	0	0	0	0	0	0	0
1700051K13Rik	36	4	21	15	11	3	12	4	21	8	25	10
1700051O22Rik	0	0	0	0	0	1	0	0	0	0	0	1
1700052I22Rik	0	0	0	0	1	2	0	0	0	0	0	1
1700052K11Rik	31	29	34	14	38	27	37	8	43	39	45	31
1700054A03Rik	0	0	0	0	0	0	0	0	1	0	0	0
1700054K02Rik	0	0	0	0	0	0	0	0	0	0	0	0
1700054K19Rik	0	0	0	0	0	0	0	0	0	0	0	0
1700054M17Rik	6	1	1	6	1	0	0	1	3	6	0	6
1700054O19Rik	4	0	3	1	1	0	1	0	5	0	1	0
1700055C04Rik	0	0	0	0	0	0	0	0	0	0	0	0
1700055D18Rik	39	15	15	5	30	6	10	2	24	18	14	32
1700056E22Rik	36	15	23	1	33	20	8	1	22	21	16	21
1700056N10Rik	40	52	54	39	32	52	41	11	48	46	38	72
1700057G04Rik	0	0	0	0	0	0	0	0	0	0	0	0
1700057H15Rik	0	0	0	0	0	0	0	0	0	0	0	0
1700057H21Rik	0	0	0	0	0	0	0	0	0	0	0	0
1700058P15Rik	22	14	11	20	33	12	14	12	25	11	12	36
1700060C16Rik	0	0	0	0	1	0	0	0	0	0	0	0
1700060C20Rik	2	0	0	0	0	0	0	0	0	0	0	1
1700060J05Rik	21	24	37	25	56	34	68	4	38	31	33	114
1700060O08Rik	0	0	0	0	0	0	0	0	0	0	0	0
1700061E17Rik	0	0	0	0	0	0	0	0	0	0	0	0
1700061E18Rik	0	0	2	0	0	0	0	0	1	0	1	2
1700061F12Rik	0	0	0	0	0	0	0	0	0	0	0	0
1700061G19Rik	25	17	24	9	28	26	25	7	30	28	25	21
1700061H18Rik	0	0	0	0	0	0	0	0	0	0	0	0
1700061I17Rik	0	0	0	0	0	0	0	0	0	0	0	0
1700061J23Rik	0	0	0	0	0	0	0	0	0	0	0	0
1700063A18Rik	0	0	0	0	0	0	0	0	0	0	0	0
1700063D05Rik	0	0	0	0	0	0	0	0	0	0	0	0
1700063H04Rik	0	0	0	0	0	0	0	0	0	0	0	0
1700063H06Rik	0	0	0	0	0	0	0	0	0	0	0	0
1700063I16Rik	0	0	0	0	0	0	0	0	0	0	0	0
1700063K16Rik	0	0	0	0	0	0	0	0	0	0	0	0
1700063O14Rik	0	0	0	0	0	0	0	0	0	0	0	0
1700064H15Rik	8	22	12	6	14	29	6	3	14	9	6	17
1700064J06Rik	0	0	0	0	0	0	0	0	0	0	0	0
1700064M15Rik	1	0	1	1	2	1	1	0	1	2	4	0
1700065D16Rik	10	2	10	6	2	8	5	0	2	4	17	11
1700065I16Rik	0	0	0	0	0	0	0	0	0	0	0	0
1700065J11Rik	0	0	0	0	0	0	0	0	0	0	0	0
1700065J18Rik	0	1	0	0	1	0	0	0	0	0	0	0
1700065L07Rik	0	1	0	0	0	0	0	0	0	0	0	0
1700065O20Rik	1	0	0	0	0	0	1	0	0	0	0	0
1700066B17Rik	4	4	4	2	1	4	4	0	0	0	2	7
1700066B19Rik	0	0	1	1	3	4	3	1	1	0	4	1
1700066C05Rik	0	0	0	0	0	0	0	0	0	0	0	0
1700066J03Rik	1	3	0	0	0	0	1	0	0	0	0	0
1700066M21Rik	102	114	154	63	103	120	113	19	160	161	181	86
1700066N21Rik	0	0	0	0	0	0	0	0	0	0	0	0
1700066O22Rik	0	0	0	0	0	0	0	0	0	0	0	0
1700067G17Rik	0	0	0	0	0	0	1	0	0	0	1	0
1700067K01Rik	21	10	9	8	21	17	9	3	16	7	12	21
1700067P10Rik	0	0	0	0	0	0	0	0	0	0	0	0
1700069B07Rik	4	6	6	0	4	10	5	1	5	8	2	9
1700069L16Rik	0	0	0	0	0	0	0	0	0	0	1	0
1700069P05Rik	0	0	0	0	0	0	0	0	0	0	0	0
1700071G01Rik	7	5	6	1	6	3	2	1	5	1	3	5
1700071K01Rik	0	0	0	0	1	0	0	0	0	0	0	0
1700071M16Rik	369	78	323	44	178	28	112	15	289	92	201	62
1700072B07Rik	0	0	0	0	0	1	0	0	0	0	0	0
1700072G22Rik	5	3	7	3	2	1	0	0	5	3	1	9
1700072O05Rik	0	0	0	0	0	0	0	0	0	0	0	0
1700073E17Rik	0	0	0	0	0	0	0	0	0	0	0	0
1700074A21Rik	0	0	2	0	0	1	0	0	0	0	0	0
1700074H08Rik	1	0	0	0	2	2	0	0	2	0	0	0
1700074P13Rik	0	0	0	0	0	0	0	0	0	0	0	0
1700080E11Rik	0	0	0	0	0	0	0	0	0	0	0	0
1700080G11Rik	0	0	0	0	0	0	0	0	0	0	0	0
1700080N15Rik	0	0	0	0	0	0	0	0	0	0	0	0
1700080O16Rik	0	0	0	0	0	0	0	0	0	0	0	0
1700081H04Rik	0	0	0	0	0	0	0	0	0	0	0	0
1700082M22Rik	0	0	0	0	1	0	0	0	1	0	0	0
1700083H02Rik	0	0	0	0	0	0	0	0	0	0	0	0
1700084C06Rik	22	6	13	10	22	26	14	6	19	11	16	11
1700084E18Rik	49	24	18	21	41	29	12	2	23	4	15	19
1700084F23Rik	0	0	0	0	0	0	0	0	0	0	0	0
1700084J12Rik	26	14	22	19	15	14	15	2	28	15	13	16
1700084M14Rik	0	0	0	0	0	0	0	0	0	0	0	0
1700085C21Rik	0	0	0	0	0	0	0	0	0	0	0	0
1700086D15Rik	0	0	0	0	0	1	2	0	1	0	0	1
1700086L19Rik	0	2	0	0	0	0	0	0	0	0	0	0
1700086O06Rik	20	15	18	10	25	26	24	8	13	15	20	24
1700086P04Rik	4	6	2	0	6	2	0	3	8	2	2	4
1700087M22Rik	9	5	10	6	3	5	13	4	16	6	7	15
1700088E04Rik	35	97	21	26	65	105	66	15	47	23	29	64
1700091H14Rik	0	0	0	0	0	0	0	0	0	0	0	0
1700092C02Rik	0	0	0	0	0	0	0	0	0	0	0	0
1700092C10Rik	0	0	0	0	0	0	0	0	0	0	0	0
1700092C17Rik	0	0	0	0	0	0	0	0	0	1	0	0
1700092E19Rik	0	0	0	0	0	0	0	0	0	0	0	0
1700092K14Rik	2	0	0	0	0	0	0	0	2	0	0	0
1700092M07Rik	0	1	1	0	1	0	1	0	0	0	0	0
1700093J21Rik	2	2	2	0	4	0	1	0	5	0	3	1
1700093K21Rik	5	0	1	0	3	2	4	3	5	3	1	0
1700094J05Rik	2	6	8	9	3	2	2	1	7	13	8	9
1700094M24Rik	0	0	0	0	1	0	0	0	0	0	0	0
1700095A13Rik	1	0	0	0	1	0	0	0	0	0	0	0
1700095A21Rik	1	0	0	0	1	0	2	0	0	0	0	0
1700095B10Rik	0	0	1	0	0	0	1	0	0	0	1	3
1700095J03Rik	0	0	0	0	0	0	0	0	0	0	0	0
1700095J07Rik	2	0	1	0	0	1	0	0	0	0	0	1
1700095J12Rik	26	17	26	16	24	21	20	2	39	17	14	14
1700095K22Rik	3	6	5	0	3	4	0	0	1	0	4	0
1700096J18Rik	0	1	1	0	1	0	0	0	3	0	0	3
1700096K18Rik	36	19	24	20	50	27	41	9	28	18	28	38
1700097M23Rik	0	0	0	0	0	0	0	0	0	0	0	1
1700097N02Rik	0	0	0	0	0	0	0	0	0	0	0	0
1700099I09Rik	57	20	38	10	44	20	38	8	59	23	35	18
1700100L14Rik	1	2	4	0	6	3	2	3	9	2	1	0
1700101I11Rik	54	20	34	23	35	25	14	9	45	23	47	38
1700101I19Rik	0	0	0	0	0	0	0	0	0	0	0	0
1700101O22Rik	0	0	0	0	0	0	0	0	0	1	0	0
1700102F20Rik	0	0	0	0	0	0	0	0	0	0	0	0
1700102P08Rik	6	6	6	1	4	6	8	1	6	6	4	9
1700104B16Rik	2	3	3	1	3	3	0	1	8	2	2	2
1700105P06Rik	14	16	8	9	5	5	4	0	13	8	5	9
1700108F19Rik	0	0	0	2	1	0	1	0	0	0	0	0
1700108J01Rik	7	9	6	0	9	11	15	0	5	0	4	10
1700108N11Rik	0	0	0	0	0	0	0	0	0	0	0	1
1700109G14Rik	4	2	1	0	1	2	0	0	1	0	0	0
1700109G15Rik	0	0	0	0	0	0	0	0	0	0	0	0
1700109H08Rik	126	393	188	334	146	294	169	77	142	240	215	472
1700109I08Rik	0	0	0	0	0	0	0	0	0	0	0	0
1700109K24Rik	4	6	10	1	23	15	24	0	6	9	4	4
1700110C19Rik	9	2	1	5	5	0	0	0	2	12	3	11
1700110I01Rik	0	0	0	0	0	0	0	0	0	0	0	0
1700110I07Rik	0	0	1	0	0	0	0	0	1	0	0	0
1700110K17Rik	33	12	16	12	14	4	9	3	23	19	18	26
1700111E14Rik	16	20	3	0	57	39	24	6	21	6	7	3
1700111N16Rik	0	0	0	0	0	0	0	0	0	0	0	0
1700112D23Rik	0	0	0	0	0	0	0	0	0	0	0	0
1700112E06Rik	229	172	368	232	119	91	176	50	105	154	87	104
1700112H15Rik	4	1	2	7	3	3	1	0	3	2	2	8
1700112J05Rik	1	1	0	1	0	1	1	0	1	4	0	0
1700112J16Rik	15	7	9	3	7	3	5	0	13	11	6	13
1700112K13Rik	0	0	0	0	0	0	0	0	0	0	0	0
1700113A16Rik	33	14	18	9	24	22	10	0	21	8	24	15
1700113B19Rik	0	0	2	0	0	1	1	0	0	0	0	0
1700113H08Rik	0	0	0	0	0	0	0	0	0	0	0	0
1700116B05Rik	0	0	0	0	0	0	0	0	0	0	0	0
1700119H24Rik	0	0	0	0	0	0	0	0	0	0	0	0
1700119I11Rik	1	0	0	0	0	0	0	0	1	0	0	0
1700120B22Rik	2	2	0	1	3	4	2	2	0	3	0	1
1700120C14Rik	12	11	5	3	6	6	6	1	8	9	11	9
1700120C18Rik	0	0	0	0	0	0	0	0	0	0	0	0
1700120E14Rik	0	0	0	3	0	1	1	0	0	0	0	0
1700120G07Rik	4	2	2	0	0	0	0	1	2	4	2	1
1700120G11Rik	0	0	0	0	0	0	0	0	0	0	0	0
1700120K04Rik	0	0	0	0	0	0	0	0	0	0	0	0
1700120O09Rik	0	0	0	0	0	0	0	0	0	0	0	0
1700121C08Rik	3	0	1	0	3	0	0	0	0	0	2	1
1700121L03Rik	0	0	0	0	0	0	0	0	0	0	0	0
1700121L16Rik	0	0	0	0	0	0	0	0	0	0	0	0
1700121N20Rik	0	0	0	0	0	0	0	0	0	0	0	0
1700122D07Rik	0	0	0	0	0	0	0	0	0	0	0	0
1700122E12Rik	27	11	23	18	59	39	19	6	34	16	12	17
1700122O11Rik	1	0	0	0	0	0	0	0	0	0	0	0
1700123K08Rik	0	0	0	0	0	0	1	0	0	0	0	0
1700123L14Rik	0	0	0	0	0	0	0	0	0	0	0	0
1700123M08Rik	14	3	10	11	13	1	6	2	12	9	6	10
1700123O12Rik	0	0	0	0	0	0	0	0	0	0	0	0
1700123O20Rik	220	202	307	138	294	446	376	74	354	235	281	271
1700123O21Rik	0	0	0	0	0	0	0	0	0	0	0	0
1700124L16Rik	1	1	2	0	2	5	1	0	1	0	0	4
1700125G02Rik	0	0	0	0	0	0	0	0	0	0	0	0
1700125G22Rik	4	9	1	1	1	1	0	0	1	1	1	4
1700125H03Rik	0	0	0	0	0	0	0	0	0	0	0	0
1700125H20Rik	0	1	1	0	3	0	0	0	0	0	0	0
1700126A01Rik	0	0	0	0	0	0	0	0	0	0	0	0
1700126G02Rik	4	2	7	6	12	9	5	2	6	1	4	14
1700126H18Rik	0	0	0	0	0	0	0	0	0	0	0	0
1700128A07Rik	0	0	0	0	0	0	0	0	0	0	0	0
1700128E19Rik	0	0	0	0	0	0	0	0	0	0	0	0
1700128F08Rik	0	0	0	0	0	0	0	0	0	0	0	0
1700129C05Rik	0	0	0	0	0	0	0	0	0	0	0	0
1700129L04Rik	0	0	0	0	0	0	0	0	0	0	0	0
1810006J02Rik	0	0	0	0	0	0	1	0	1	0	1	0
1810007C17Rik	0	0	0	0	0	0	0	0	0	0	0	0
1810007D17Rik	0	0	2	0	0	1	0	0	0	2	0	0
1810008B01Rik	12	2	7	2	8	8	9	3	7	2	14	10
1810008I18Rik	0	0	1	0	0	0	0	0	1	0	0	0
1810009A15Rik	2	1	0	0	3	6	1	0	4	0	2	5
1810009J06Rik	0	0	0	0	0	0	0	0	0	0	0	0
1810010D01Rik	35	25	28	17	58	36	32	10	39	13	19	17
1810010H24Rik	13	11	5	6	15	16	9	6	11	0	1	10
1810010K12Rik	0	0	0	0	0	0	0	0	0	0	0	0
1810011H11Rik	321	188	312	186	185	74	98	24	355	187	225	353
1810011O10Rik	1	1	3	0	0	2	1	0	0	0	0	0
1810012K08Rik	17	6	11	2	6	13	12	2	8	0	6	7
1810012K16Rik	5	1	1	2	8	0	6	0	0	2	5	2
1810013D15Rik	1	0	1	0	3	4	0	0	0	0	1	0
1810013L24Rik	1799	2163	2180	1330	2143	3095	3222	585	2514	1701	2584	2859
1810014B01Rik	34	36	83	12	45	53	85	4	41	41	78	16
1810017P11Rik	0	0	0	0	0	0	1	0	0	0	0	0
1810018F18Rik	0	0	0	0	0	0	0	0	0	0	0	0
1810019D21Rik	15	8	7	0	13	15	7	4	17	5	7	9
1810019N24Rik	9	3	6	1	9	2	2	0	6	2	7	10
1810020O05Rik	0	1	0	0	0	0	1	0	0	3	0	0
1810021B22Rik	24	14	10	16	22	24	23	1	17	11	7	21
1810022K09Rik	100	98	82	73	92	113	140	21	62	74	108	114
1810024B03Rik	25	16	9	2	22	12	16	2	18	8	13	13
1810026B05Rik	904	996	782	397	848	884	708	158	688	726	974	766
1810026J23Rik	668	635	662	374	766	1187	884	199	910	485	673	674
1810030O07Rik	467	504	728	297	418	562	576	133	650	452	669	562
1810032O08Rik	29	65	83	32	33	55	34	5	53	58	85	42
1810034E14Rik	75	69	39	33	73	82	101	24	91	31	66	74
1810037I17Rik	287	295	379	113	255	523	426	63	345	246	261	298
1810041H14Rik	7	9	5	1	11	10	5	1	9	3	8	3
1810041L15Rik	1	2	1	0	0	3	0	0	0	0	0	0
1810043G02Rik	260	127	208	151	130	72	93	33	196	101	151	208
1810043H04Rik	93	92	96	38	84	113	103	18	118	86	94	84
1810044D09Rik	14	13	22	15	17	24	13	3	17	13	12	11
1810046K07Rik	0	0	0	0	0	0	0	0	0	0	0	1
1810049J17Rik	1	1	0	0	2	0	0	0	0	1	0	1
1810053B23Rik	0	0	0	0	0	0	2	0	0	0	0	0
1810055G02Rik	69	117	132	90	56	145	103	16	90	73	132	98
1810058I24Rik	782	632	657	429	870	1217	1262	232	858	559	662	769
1810059C17Rik	1	2	1	1	2	1	0	0	2	1	0	2
1810059H22Rik	0	2	2	0	1	0	0	0	0	0	0	0
1810062G17Rik	3	9	10	0	8	3	8	2	11	4	5	4
1810062O18Rik	12	17	19	9	25	18	13	7	20	7	19	19
1810063I02Rik	0	0	0	0	0	0	0	0	0	0	0	0
1810064F22Rik	0	0	0	0	0	0	0	0	0	0	0	0
1810065E05Rik	0	0	0	0	0	0	0	0	0	0	0	0
2010001A14Rik	13	7	6	2	18	9	20	1	7	4	7	11
2010001K21Rik	9	10	17	6	13	12	15	3	12	4	16	12
2010003K11Rik	0	0	0	0	0	0	0	0	0	0	0	0
2010005H15Rik	0	1	3	0	0	0	0	0	1	1	2	0
2010007H06Rik	1	0	0	0	4	7	1	0	2	0	1	0
2010008C14Rik	40	23	33	21	28	21	31	9	50	17	46	31
2010009K17Rik	4	2	6	0	3	5	1	0	3	5	3	0
2010010A06Rik	3	1	3	2	0	0	0	0	4	0	2	0
2010013B24Rik	13	1	6	2	11	2	5	0	7	2	6	11
2010015M23Rik	13	30	10	2	15	32	9	0	10	13	15	16
2010016I18Rik	40	37	19	20	32	16	29	3	54	13	29	30
2010103J01Rik	4	1	4	1	6	5	7	3	4	5	3	5
2010106C02Rik	4	3	4	0	4	0	1	2	6	2	1	3
2010106E10Rik	0	4	0	0	0	0	0	0	0	0	0	0
2010107E04Rik	514	486	591	200	701	1048	1141	158	700	425	521	517
2010107G23Rik	2	9	5	2	8	16	2	2	7	1	2	1
2010109A12Rik	24	9	15	9	17	10	7	3	12	15	15	22
2010109I03Rik	5	6	6	4	5	3	2	0	2	3	5	1
2010109P13Rik	1	0	0	0	0	0	0	0	0	0	0	0
2010110E17Rik	8	4	1	3	8	4	1	0	4	1	2	12
2010110G14Rik	0	0	0	0	0	0	0	0	0	0	0	0
2010110K18Rik	1	9	21	4	4	9	5	0	6	9	21	3
2010111I01Rik	1414	1800	1139	811	1052	1814	947	227	1814	1002	1055	1597
2010204K13Rik	2	10	10	3	0	15	9	0	4	2	20	3
2010300C02Rik	29	30	21	9	33	37	49	14	37	28	26	27
2010300F17Rik	0	0	0	0	3	1	0	0	0	0	2	1
2010308F09Rik	0	1	0	0	0	0	0	0	0	0	1	0
2010309G21Rik	0	0	0	0	0	0	0	0	0	0	0	0
2010310C07Rik	29	35	16	15	21	23	8	3	20	7	9	22
2010315B03Rik	456	274	467	155	525	496	621	123	468	287	520	345
2010320M18Rik	82	58	61	33	123	132	101	17	104	37	44	81
2010320O07Rik	22	4	13	13	15	14	2	5	27	20	9	31
2200002A13Rik	3	1	0	0	0	1	0	0	1	0	0	0
2200002D01Rik	9	14	9	9	5	12	13	6	8	7	13	13
2200002J24Rik	0	0	1	0	3	4	2	0	0	0	0	0
2200007N16Rik	0	0	0	0	0	0	0	0	0	0	0	0
2210008F06Rik	32	80	35	7	112	178	185	37	81	24	42	39
2210010C04Rik	0	0	0	0	0	0	0	0	0	0	0	2
2210011C24Rik	11	6	1	1	4	4	3	0	11	2	5	9
2210011K15Rik	1	0	0	0	2	1	1	0	1	0	0	2
2210013O21Rik	118	90	119	67	120	96	115	24	103	63	108	135
2210016F16Rik	475	619	704	354	558	851	693	162	781	593	665	538
2210016L21Rik	240	269	299	228	228	346	273	51	294	228	263	300
2210017I01Rik	0	0	0	0	0	0	0	0	0	0	0	0
2210019I11Rik	0	0	0	0	0	0	0	0	0	0	0	0
2210406H18Rik	91	81	110	147	59	77	58	16	91	72	104	185
2210406O10Rik	12	8	2	1	11	11	4	2	7	3	5	4
2210407C18Rik	0	0	0	0	0	0	0	0	0	2	0	0
2210408F21Rik	119	46	94	29	94	41	81	15	97	41	54	78
2210408I21Rik	103	83	82	28	81	88	73	8	93	90	73	76
2210409E12Rik	0	0	0	0	1	0	0	0	0	0	0	0
2210411M09Rik	3	3	0	1	2	1	2	0	0	2	3	3
2210412B16Rik	4	1	1	1	3	0	2	0	3	0	3	2
2210414B05Rik	5	1	1	1	4	1	0	0	2	0	0	3
2210417A02Rik	3	0	1	2	0	0	1	0	0	0	0	1
2210418O10Rik	0	0	0	1	0	0	4	1	0	0	0	0
2210420H20Rik	0	0	0	0	0	0	0	0	0	0	0	0
2300002M23Rik	0	0	0	0	0	0	0	0	0	0	0	0
2300003K06Rik	0	0	0	0	0	0	0	0	0	0	0	0
2300009A05Rik	98	93	60	59	113	154	157	21	73	54	106	114
2310001H17Rik	330	110	174	114	259	122	176	34	232	101	209	187
2310001K20Rik	0	0	0	0	0	0	0	0	0	0	0	0
2310001K24Rik	0	1	0	0	2	0	1	0	4	0	4	0
2310002F09Rik	0	0	0	0	0	0	0	0	0	0	0	0
2310002L09Rik	0	0	0	0	0	0	0	0	0	0	0	0
2310003L06Rik	0	0	0	0	0	0	0	0	0	0	0	0
2310005A03Rik	0	0	0	0	0	0	0	0	0	0	0	0
2310005E17Rik	0	0	0	0	0	0	0	0	0	0	0	0
2310007B03Rik	0	1	0	0	0	0	0	0	0	0	0	0
2310008N11Rik	0	1	0	0	0	0	0	0	3	0	0	2
2310009A05Rik	31	27	23	11	34	32	39	1	19	19	31	35
2310009B15Rik	52	38	68	21	35	63	67	8	72	68	52	38
2310010J17Rik	34	17	24	29	18	22	18	11	27	26	13	37
2310011J03Rik	339	359	430	260	348	594	455	77	458	348	455	390
2310014F06Rik	1	1	0	0	0	0	0	0	0	0	0	0
2310015A10Rik	113	60	114	67	114	44	57	24	82	68	112	112
2310015D24Rik	1	1	0	0	1	4	1	0	0	0	0	1
2310015K22Rik	0	0	0	0	0	0	0	0	0	0	0	0
2310016D03Rik	0	0	0	0	0	0	0	0	0	0	0	0
2310016D23Rik	4	2	3	0	2	1	2	1	2	1	2	4
2310016G11Rik	0	0	0	0	0	0	0	0	0	0	0	0
2310020H05Rik	0	0	0	0	0	0	0	0	1	0	0	0
2310022A10Rik	878	934	1522	866	790	976	1053	240	1227	970	1521	1287
2310022B05Rik	209	156	213	142	157	219	192	49	222	141	187	224
2310026I22Rik	0	0	0	0	0	0	0	0	0	0	0	0
2310026L22Rik	24	10	9	6	8	14	11	4	11	7	8	9
2310030A07Rik	0	0	0	0	1	1	0	0	4	0	0	1
2310030G06Rik	1	4	0	0	3	2	5	0	0	0	0	0
2310031A07Rik	4	6	4	5	7	12	7	2	7	3	1	3
2310033P09Rik	113	133	145	64	120	194	139	35	105	92	146	100
2310034C09Rik	0	0	0	0	0	0	0	0	0	0	0	0
2310034G01Rik	3	3	1	0	4	4	1	0	4	2	1	4
2310034O05Rik	3	2	1	0	5	0	0	0	3	2	0	1
2310035C23Rik	1313	843	1436	608	1336	1131	1507	276	1563	760	1319	878
2310036O22Rik	845	863	1150	615	712	1009	826	182	1118	842	1068	910
2310039H08Rik	47	49	69	25	79	144	135	27	86	58	69	78
2310039L15Rik	2	0	0	0	0	0	0	0	1	0	0	0
2310040G07Rik	7	25	24	5	15	13	17	3	24	8	11	8
2310040G24Rik	30	16	27	11	25	7	18	3	34	13	13	36
2310043L19Rik	0	13	1	1	8	4	1	6	2	1	8	4
2310043M15Rik	45	27	41	21	50	45	25	13	30	36	41	39
2310043O21Rik	0	5	1	1	2	0	0	2	0	3	2	3
2310043P16Rik	96	62	54	88	67	47	36	26	44	55	64	156
2310044K18Rik	4	2	2	2	6	1	1	0	2	6	3	2
2310046K23Rik	0	0	0	0	0	0	0	0	0	0	0	0
2310047D07Rik	0	0	0	1	3	1	1	1	0	0	1	0
2310050C09Rik	0	0	0	0	0	0	0	0	0	0	0	0
2310057J18Rik	1	0	0	0	0	0	0	0	0	0	0	1
2310057M21Rik	284	424	394	193	359	623	535	102	406	343	437	345
2310057N15Rik	0	0	0	0	0	0	0	0	0	0	0	0
2310058D17Rik	138	76	76	38	181	87	87	23	107	61	113	66
2310061I04Rik	179	126	118	75	196	230	336	57	166	49	107	107
2310061N02Rik	0	0	0	0	0	0	0	0	0	0	0	0
2310065F04Rik	0	0	0	0	0	0	0	0	0	0	0	0
2310068J16Rik	23	12	11	7	18	17	20	3	9	6	9	13
2310069B03Rik	18	24	12	7	35	69	54	3	24	8	6	11
2310069G16Rik	0	0	0	0	0	3	0	0	0	0	0	0
2310074N15Rik	3	2	0	0	3	2	1	0	1	0	1	0
2310075C17Rik	0	3	0	0	0	0	0	0	0	0	0	0
2310079G19Rik	0	0	0	0	0	0	0	0	0	0	0	0
2310081O03Rik	1	0	0	0	0	1	0	0	1	1	0	0
2410002F23Rik	241	252	309	165	255	250	273	54	251	288	342	218
2410003L11Rik	0	1	4	0	1	0	4	0	1	1	2	3
2410004B18Rik	200	195	157	106	161	299	195	29	189	140	220	197
2410004I01Rik	1	0	0	0	0	0	0	0	0	0	0	0
2410004P03Rik	10	5	6	10	6	6	4	1	10	6	7	5
2410006H16Rik	401	214	339	171	357	267	287	79	266	234	373	223
2410012E07Rik	0	0	0	0	0	0	0	0	0	0	0	0
2410015M20Rik	416	493	488	190	674	1114	993	142	665	413	431	433
2410016O06Rik	114	188	175	87	171	264	203	39	215	193	191	129
2410017I17Rik	2	5	4	2	1	8	12	2	2	6	11	4
2410018L13Rik	0	0	0	0	0	0	1	0	0	0	0	0
2410021H03Rik	0	0	1	4	0	0	0	0	1	0	1	1
2410022M11Rik	91	78	78	35	126	123	57	25	95	28	57	61
2410024N13Rik	0	0	0	0	0	0	0	0	0	0	0	0
2410080I02Rik	6	3	3	6	9	6	5	4	7	3	2	6
2410089E03Rik	588	414	592	301	411	391	386	120	562	294	557	489
2410124H12Rik	0	0	0	0	0	0	0	0	0	0	0	0
2410131K14Rik	613	665	682	356	1170	1707	1327	292	1048	509	688	585
2410137M14Rik	0	0	0	0	0	1	0	0	0	0	0	0
2410141K09Rik	0	0	0	0	0	0	0	2	0	0	0	0
2410152P15Rik	0	0	0	0	1	0	0	0	0	0	0	0
2500002B13Rik	81	77	42	60	173	146	170	31	88	54	53	82
2500004C02Rik	27	20	12	5	22	14	23	3	25	7	9	24
2510002D24Rik	45	51	54	31	73	121	101	18	49	57	49	50
2510009E07Rik	625	521	469	397	423	409	341	98	690	451	427	566
2510016D11Rik	124	115	227	68	153	135	193	39	148	110	200	94
2510017J16Rik	25	45	27	19	18	33	24	7	23	22	34	52
2510039O18Rik	1587	1786	1972	1141	1555	2824	1814	418	2134	1524	1888	1728
2510046G10Rik	2	1	4	0	5	3	6	3	2	4	5	3
2600006K01Rik	6	8	6	1	6	4	4	1	3	5	4	7
2600014E21Rik	0	1	0	0	1	1	0	0	0	0	0	1
2610001A08Rik	0	3	2	2	1	0	0	0	2	2	2	0
2610001J05Rik	499	607	781	451	486	658	759	147	712	618	736	811
2610002M06Rik	260	267	395	227	275	375	393	56	376	251	399	326
2610005L07Rik	63	70	69	42	75	67	53	24	49	31	80	78
2610008E11Rik	130	104	170	49	132	134	150	22	160	80	184	72
2610011E03Rik	0	0	0	0	0	0	0	0	0	0	0	0
2610012C04Rik	29	29	46	5	34	34	44	6	44	31	57	27
2610016A17Rik	0	0	0	0	0	0	0	0	0	0	0	0
2610020C07Rik	85	152	94	147	56	90	61	36	77	91	90	224
2610020F03Rik	1	0	0	0	1	0	0	0	2	0	0	0
2610020H08Rik	117	135	165	55	88	79	87	24	141	116	136	90
2610021A01Rik	153	136	194	49	158	168	216	25	163	154	218	86
2610024D14Rik	53	194	93	208	44	107	32	22	65	164	91	315
2610027F03Rik	0	0	0	0	0	0	0	0	0	0	0	0
2610027K06Rik	28	37	48	14	26	25	27	0	35	21	32	19
2610028E06Rik	1	0	0	0	0	0	0	0	0	0	0	0
2610028H24Rik	0	0	0	0	0	0	0	0	0	0	0	0
2610034O05Rik	3	0	1	0	1	0	0	0	1	0	1	0
2610035D17Rik	43	16	11	21	16	13	13	6	39	10	6	46
2610035F20Rik	0	0	0	0	0	0	1	0	0	0	0	0
2610037D02Rik	90	106	105	86	107	85	72	26	77	96	117	151
2610042L04Rik	0	0	0	0	0	0	0	0	0	0	0	0
2610044O15Rik8	91	62	100	41	84	78	101	18	102	75	79	69
2610105M22Rik	0	0	0	0	0	0	0	0	0	0	0	0
2610203C20Rik	0	0	2	15	0	0	0	0	0	2	0	14
2610203C22Rik	13	19	37	12	7	25	25	3	25	14	28	19
2610204G07Rik	17	21	24	12	23	22	20	5	23	22	34	27
2610206C17Rik	7	2	0	1	4	1	3	0	4	1	1	9
2610300A13Rik	0	0	0	0	0	0	0	0	0	0	0	0
2610301B20Rik	119	103	119	50	120	154	139	18	164	88	121	111
2610303G11Rik	0	0	0	0	0	0	0	0	0	0	0	0
2610306M01Rik	30	32	13	24	36	37	30	4	29	23	17	22
2610306O10Rik	100	45	69	36	95	31	138	2	78	32	77	40
2610307P16Rik	0	0	0	0	0	0	2	0	0	0	0	0
2610316D01Rik	0	0	0	0	0	0	0	0	0	0	0	0
2610318N02Rik	37	58	82	24	19	38	19	3	35	55	79	20
2610507B11Rik	10243	9924	11682	7462	10666	13791	12371	2818	14368	7011	9831	10595
2610507I01Rik	98	50	66	60	127	114	129	23	87	39	44	98
2610509F24Rik	0	0	0	0	0	0	0	0	0	0	0	0
2610524H06Rik	24	39	36	21	25	20	17	12	45	40	41	44
2610528A11Rik	14	9	40	10	10	13	8	4	16	7	24	22
2610528J11Rik	0	0	0	0	0	0	0	0	0	0	0	0
2700012I20Rik	21	5	12	5	11	4	7	3	5	4	6	11
2700016F22Rik	1	8	8	1	6	10	6	0	8	6	13	16
2700029L08Rik	29	23	17	5	22	19	17	2	32	10	14	26
2700033N17Rik	0	0	0	0	1	0	0	0	0	0	1	0
2700038G22Rik	48	66	63	50	58	52	46	25	51	53	86	61
2700046A07Rik	0	0	0	0	1	0	0	0	0	1	0	0
2700046G09Rik	14	23	21	17	22	25	19	9	11	14	16	27
2700049A03Rik	187	245	317	74	233	306	306	48	301	228	459	183
2700060E02Rik	605	398	512	282	460	552	652	111	585	427	571	574
2700062C07Rik	61	63	112	32	96	120	120	19	97	72	107	69
2700068H02Rik	0	1	0	0	0	0	0	0	0	0	0	1
2700069I18Rik	0	0	0	0	0	0	0	0	0	0	0	0
2700078F05Rik	1	1	0	2	3	4	2	0	0	0	0	0
2700080J24Rik	0	0	1	0	1	0	0	0	1	0	0	0
2700081O15Rik	73	74	106	49	50	93	64	18	69	90	119	75
2700089I24Rik	0	0	1	0	0	0	0	0	0	0	0	0
2700094K13Rik	143	320	420	78	142	235	188	32	257	359	429	196
2700097O09Rik	69	36	90	29	67	48	69	18	47	47	58	58
2700099C18Rik	29	51	100	7	44	50	57	12	45	79	116	28
2810001G20Rik	15	21	15	5	23	23	25	6	19	18	25	20
2810002D19Rik	51	46	55	33	48	78	54	10	64	56	46	71
2810004N23Rik	229	270	306	107	243	417	339	58	272	217	294	191
2810006K23Rik	90	98	103	63	117	202	148	20	114	101	114	89
2810013P06Rik	337	166	280	107	306	157	205	53	243	166	180	231
2810021J22Rik	70	58	84	31	97	72	98	14	126	58	95	50
2810025M15Rik	194	329	161	40	578	1032	896	133	413	158	186	168
2810029C07Rik	10	16	4	6	34	11	12	0	8	11	3	13
2810030D12Rik	9	2	1	3	4	1	1	0	3	2	2	1
2810032G03Rik	0	0	0	0	0	0	0	0	0	0	0	0
2810039B14Rik	9	5	12	6	3	10	15	10	17	10	12	13
2810047C21Rik1	0	0	0	0	0	0	4	0	0	0	0	1
2810049E08Rik	0	0	0	0	0	0	0	0	0	0	0	0
2810402E24Rik	53	43	68	30	60	76	79	10	61	52	60	76
2810403A07Rik	883	697	824	508	901	842	938	227	788	390	682	803
2810403D21Rik	37	26	40	16	35	23	39	6	28	33	46	35
2810404F17Rik	0	1	0	0	1	1	1	0	0	0	1	3
2810404M03Rik	0	0	0	0	0	0	0	0	0	0	0	0
2810405F15Rik	0	0	0	2	1	0	0	0	0	0	0	0
2810405F17Rik	44	49	30	24	30	45	25	7	28	32	54	48
2810407A14Rik	3	0	2	0	3	0	2	0	0	0	0	0
2810408A11Rik	4	3	1	0	1	3	1	0	1	1	2	5
2810408I11Rik	40	19	24	17	37	31	32	7	23	26	18	27
2810410L24Rik	1	1	3	0	2	1	0	1	3	0	2	0
2810414N06Rik	19	10	12	7	23	20	17	0	16	13	11	13
2810417H13Rik	166	726	995	121	142	375	404	17	366	1192	1242	264
2810425M01Rik	1	9	2	1	4	7	3	0	4	6	2	2
2810428I15Rik	234	266	331	181	204	360	328	51	269	277	333	269
2810428J06Rik	17	19	21	17	18	18	12	12	7	15	24	29
2810429I04Rik	0	4	1	3	0	1	3	1	0	0	2	2
2810430I11Rik	0	0	0	0	0	0	0	0	0	0	0	0
2810432F15Rik	0	0	0	0	0	0	0	0	0	0	0	0
2810433D01Rik	0	0	0	0	0	0	0	0	0	0	0	1
2810442N19Rik	2	2	6	4	0	2	1	0	0	0	2	1
2810454H06Rik	20	4	14	10	24	16	15	2	19	12	16	33
2810455O05Rik	36	38	68	10	26	30	27	5	45	37	60	30
2810459M11Rik	1	1	3	1	0	1	0	1	2	2	1	3
2810468N07Rik	0	0	0	0	0	0	0	0	0	1	0	1
2810471M01Rik	0	0	0	0	0	0	0	0	0	0	0	0
2810474O19Rik	3030	5727	3878	4908	3123	5063	4077	1193	4138	3911	3971	10298
2900002M20Rik	0	0	0	0	0	0	0	0	0	0	0	0
2900005J15Rik	43	28	27	28	58	36	29	11	33	20	25	21
2900009J06Rik	1	0	2	0	0	1	1	0	0	0	1	0
2900011O08Rik	2	0	2	0	1	1	0	0	1	0	0	1
2900018N21Rik	1	0	3	0	1	2	4	1	3	0	2	2
2900022M07Rik	0	0	0	0	0	0	0	0	0	0	0	0
2900026A02Rik	100	89	104	63	62	94	86	19	109	57	128	58
2900027M19Rik	0	0	0	0	0	0	0	0	0	0	0	0
2900035J10Rik	11	9	9	6	11	8	13	2	16	11	22	15
2900037B21Rik	0	0	0	0	0	0	0	0	0	0	0	0
2900041M22Rik	0	0	0	0	0	0	0	0	0	1	0	0
2900042K21Rik	0	0	0	0	0	0	0	0	0	0	0	0
2900052L18Rik	29	32	19	10	10	12	12	6	24	5	18	22
2900052N01Rik	0	0	0	0	0	0	0	0	0	0	0	0
2900055J20Rik	0	0	0	0	0	0	0	0	0	0	0	0
2900060B14Rik	16	20	11	5	11	34	6	5	8	12	11	20
2900064F13Rik	0	0	0	0	0	0	0	0	0	0	0	0
2900064K03Rik	0	0	0	0	0	0	0	0	0	1	0	0
2900069G24Rik	0	0	0	0	0	0	0	0	0	0	0	0
2900072N19Rik	3	1	2	0	1	0	0	0	1	0	3	4
2900076A07Rik	24	31	26	27	24	54	51	5	30	22	31	46
2900076G11Rik	2	0	2	0	1	0	0	2	2	3	4	1
2900079G21Rik	0	0	0	0	0	0	0	0	0	0	0	0
2900089D17Rik	186	75	134	66	88	41	50	19	129	51	148	108
2900092C05Rik	0	0	0	0	0	0	0	0	0	0	0	0
2900092N22Rik	16	24	12	4	34	45	41	7	18	6	11	6
2900092O11Rik	0	0	1	0	1	0	0	0	0	0	0	0
2900093K20Rik	38	26	34	22	59	30	22	7	43	32	30	58
2900097C17Rik	832	774	746	523	723	927	714	165	1130	533	781	922
3000002C10Rik	7	6	13	3	7	8	20	5	13	7	14	13
3010001F23Rik	0	0	0	0	0	0	0	0	0	0	0	0
3010003L21Rik	30	41	41	10	56	54	45	12	44	21	31	27
3010026O09Rik	179	109	174	95	113	114	56	34	137	83	117	223
3100002H09Rik	0	0	0	0	0	0	0	0	0	0	0	0
3100003L05Rik	0	0	0	0	0	0	0	0	0	0	0	0
3110001I22Rik	83	76	87	90	79	106	110	36	88	63	114	157
3110002H16Rik	911	942	866	525	803	1150	966	225	956	559	770	852
3110004A20Rik	0	0	0	0	0	0	0	0	0	0	0	0
3110009E18Rik	30	23	29	8	37	34	35	12	24	23	31	31
3110018I06Rik	0	0	0	0	0	0	0	0	0	0	0	0
3110021N24Rik	0	0	1	0	1	0	0	1	0	0	0	0
3110031N09Rik	0	0	0	0	1	0	0	1	1	0	0	0
3110035E14Rik	1	4	5	1	1	0	2	1	4	10	7	1
3110039M20Rik	0	0	0	0	0	0	0	0	0	0	0	0
3110040N11Rik	77	88	105	41	85	138	107	24	114	58	83	94
3110043O21Rik	1355	1484	1680	1068	2039	3154	3455	558	2109	1228	1852	1935
3110045C21Rik	4	11	2	0	6	6	7	0	4	6	0	1
3110053B16Rik	13	21	15	1	12	12	28	1	18	8	8	5
3110056K07Rik	63	81	60	50	61	98	76	19	55	40	70	67
3110062G12Rik	22	22	21	24	10	9	15	1	22	11	21	38
3110062M04Rik	159	179	180	100	257	336	285	65	252	145	145	214
3110067C02Rik	2	4	2	1	7	1	7	0	7	2	10	0
3110070M22Rik	5	3	3	5	9	11	8	5	7	9	6	7
3110079O15Rik	0	0	0	0	0	0	0	0	0	0	0	1
3110080O07Rik	5	20	14	3	10	14	13	1	11	5	16	4
3110082I17Rik	187	214	362	89	200	282	323	37	246	280	322	147
3110082J24Rik	0	0	0	0	0	0	0	0	0	0	0	0
3110083C13Rik	4	3	2	0	1	1	1	0	0	0	1	2
3110099E03Rik	0	0	0	0	0	0	0	0	0	0	0	0
3222401L13Rik	42	12	9	11	29	26	25	4	35	16	11	12
3300002A11Rik	29	23	29	10	28	26	18	4	49	16	27	9
3300002I08Rik	23	10	25	9	20	18	30	2	34	8	16	17
3300002P13Rik	1	0	1	2	0	0	0	0	0	2	4	1
3300005D01Rik	9	8	12	1	6	3	9	1	6	2	19	6
3425401B19Rik	3	6	0	19	0	34	0	3	0	13	0	58
3632451O06Rik	0	0	0	0	0	0	0	0	0	0	0	0
3632454L22Rik	15	8	9	16	20	15	8	2	12	11	14	18
3830403N18Rik	7	7	11	10	9	11	5	6	6	0	25	11
3830406C13Rik	289	318	369	131	333	412	552	85	371	256	384	353
3830408C21Rik	2	2	2	1	1	0	3	2	0	0	0	1
3830417A13Rik	0	0	0	0	0	0	0	0	0	0	0	0
3830422I06Rik	0	0	0	0	0	0	0	0	0	0	0	0
3830432H09Rik	2	1	2	1	2	5	0	0	1	0	0	0
3930402G23Rik	5	1	3	4	4	6	0	0	2	2	0	2
4430402I18Rik	3	2	0	2	4	3	0	1	4	1	1	7
4631405J19Rik	15	8	13	4	15	20	8	9	25	11	26	13
4631405K08Rik	0	0	0	0	0	0	0	0	0	0	0	0
4632404H12Rik	139	68	100	64	157	78	106	25	124	62	124	118
4632404M16Rik	0	0	0	0	0	0	0	0	0	0	0	0
4632411P08Rik	12	12	7	1	7	10	2	3	9	8	11	13
4632415L05Rik	133	79	202	41	168	137	202	17	169	118	246	98
4632427E13Rik	315	397	400	222	320	312	366	99	321	408	506	418
4632428C04Rik	0	1	1	0	1	0	0	0	1	5	0	0
4632432E15Rik	0	0	0	0	0	0	0	0	0	0	0	0
4633401B06Rik	15	15	12	14	20	16	23	2	21	4	8	16
4731419I09Rik	7	10	7	0	6	0	7	0	3	7	5	3
4732414G09Rik	2	2	0	0	0	1	0	1	0	0	1	0
4732416N19Rik	36	31	26	19	41	30	12	6	17	17	49	43
4732419C18Rik	0	0	0	1	0	0	0	0	1	0	1	0
4732440D04Rik	64	87	52	93	86	122	63	27	49	70	55	150
4732463B04Rik	1	4	2	0	0	2	4	0	0	1	1	4
4732465J04Rik	0	0	0	0	1	0	0	0	0	0	0	0
4732471J01Rik	18	21	23	16	33	31	13	10	20	16	22	11
4732487G21Rik	112	74	85	58	93	124	104	10	110	62	76	79
4732490B19Rik	0	0	0	0	0	1	0	0	0	0	0	0
4732491K20Rik	12	25	18	7	19	20	15	3	14	11	19	14
4732496C06Rik	10	7	14	23	11	10	8	5	5	8	7	36
4831440E17Rik	13	6	9	3	11	5	2	1	10	2	6	3
4833403J16Rik	0	0	0	0	0	0	0	0	0	0	0	0
4833404L02Rik	1	0	0	0	0	0	0	0	0	0	0	0
4833407H14Rik	13	10	8	10	14	4	10	6	11	4	18	16
4833411C07Rik	7	2	4	0	7	4	1	0	2	1	2	0
4833412C05Rik	0	0	0	0	0	0	0	0	0	0	0	1
4833412K13Rik	38	6	34	3	47	18	63	4	42	24	34	24
4833413E03Rik	4	1	0	0	1	2	5	0	0	0	1	1
4833413G10Rik	28	12	24	9	27	8	28	9	25	8	18	20
4833417C18Rik	12	12	11	5	29	33	25	10	18	9	25	7
4833418N02Rik	186	96	102	132	208	95	89	84	122	70	98	174
4833418N17Rik	0	0	0	4	0	0	0	0	0	0	0	0
4833420G17Rik	1019	287	444	331	902	427	375	147	972	715	1307	1115
4833421G17Rik	31	66	40	8	36	49	45	7	56	25	43	25
4833421K07Rik	0	0	0	0	0	0	0	0	1	0	0	0
4833422C13Rik	1	1	1	0	1	4	2	2	1	1	0	4
4833422M21Rik	0	3	0	0	0	0	0	0	1	0	5	3
4833423E24Rik	0	2	0	0	0	0	0	0	0	0	0	0
4833427F10Rik	8	1	1	2	3	0	0	0	1	0	2	1
4833427G06Rik	3	0	0	0	1	3	3	0	1	0	0	0
4833428L15Rik	0	0	0	0	0	0	0	0	0	0	0	0
4833439L19Rik	769	742	802	476	790	899	872	211	954	616	836	811
4833445I07Rik	118	102	129	103	76	47	48	20	115	81	135	123
4921501E09Rik	0	0	0	0	0	0	0	0	0	0	0	0
4921504A21Rik	0	0	0	0	0	0	0	0	0	0	0	0
4921504E06Rik	0	0	0	0	1	1	0	0	1	0	0	0
4921507G05Rik	7	7	8	4	22	7	8	0	6	7	9	5
4921507P07Rik	6	8	5	0	19	15	12	2	8	1	7	7
4921508D12Rik	0	0	0	0	0	0	0	0	0	0	0	0
4921508M14Rik	0	0	0	0	0	0	0	0	0	1	0	0
4921509A06Rik	4	16	4	4	8	11	20	0	10	9	2	21
4921509C19Rik	0	0	0	0	0	0	0	0	0	0	0	0
4921511C10Rik	31	53	23	29	37	85	58	9	36	51	41	42
4921511C20Rik	0	0	0	0	0	0	0	0	0	0	0	0
4921511E07Rik	0	0	0	0	0	0	0	0	0	0	0	0
4921511H03Rik	0	0	0	0	0	0	0	0	0	0	0	0
4921511M17Rik	0	0	0	0	0	0	0	0	0	0	0	0
4921513D11Rik	5	8	7	15	4	13	10	1	5	5	4	17
4921513I03Rik	0	0	0	0	0	4	0	0	0	0	0	0
4921513I08Rik	0	0	0	0	0	0	0	0	0	0	0	0
4921514A10Rik	20	29	33	36	19	21	15	4	30	17	23	48
4921515E04Rik	0	0	0	0	0	0	0	0	0	0	0	0
4921517D22Rik	0	0	0	0	0	0	1	0	0	0	0	0
4921518K17Rik	0	0	0	0	0	0	0	1	0	0	0	0
4921521D15Rik	0	0	0	0	0	0	0	0	0	0	0	0
4921522P10Rik	6	23	10	11	9	19	12	6	13	13	18	11
4921523L03Rik	2	1	0	0	1	0	0	0	0	1	0	0
4921524J17Rik	85	111	94	31	104	132	122	21	110	102	108	97
4921524L21Rik	0	0	0	0	0	0	0	0	0	0	0	0
4921527H02Rik	0	0	0	0	0	0	0	0	0	0	0	0
4921528I07Rik	3	3	7	2	2	1	2	0	13	2	4	7
4921529L05Rik	1	1	2	0	6	0	2	0	2	2	1	2
4921530L21Rik	0	0	0	0	0	0	0	0	0	0	0	0
4921531C22Rik	263	93	88	88	258	133	77	29	131	53	62	216
4921534H16Rik	0	0	0	3	1	2	0	0	0	0	0	1
4921536K21Rik	6	7	9	3	8	5	11	0	11	14	12	23
4921539E11Rik	0	0	0	0	3	0	0	0	0	0	0	0
4921539H07Rik	0	0	0	0	0	0	0	0	0	0	0	0
4922502D21Rik	0	0	0	1	2	0	0	0	0	0	1	0
4922502N22Rik	0	0	0	0	0	0	0	0	0	0	0	0
4930401G09Rik	0	0	0	0	0	0	0	0	0	0	0	0
4930401O10Rik	0	0	0	0	0	0	0	0	0	0	0	0
4930401O12Rik	0	0	0	0	0	0	0	0	0	0	0	0
4930402C01Rik	0	0	0	0	0	0	0	0	0	0	1	0
4930402F06Rik	4	0	0	0	1	0	0	0	1	3	2	0
4930402F11Rik	0	0	0	0	0	0	0	0	0	0	0	0
4930402H05Rik	0	0	0	0	1	0	0	0	0	0	0	0
4930402H24Rik	963	640	876	529	692	678	716	116	1041	531	701	794
4930402K13Rik	0	0	0	0	0	0	0	0	0	0	0	0
4930403D09Rik	14	23	20	12	5	11	5	0	17	17	24	7
4930403O15Rik	10	5	7	7	11	2	4	2	9	2	5	8
4930403P22Rik	4	10	2	5	7	8	5	0	10	0	1	3
4930404A12Rik	0	0	0	0	0	0	0	0	0	0	0	2
4930404H24Rik	6	7	8	5	4	7	1	0	4	5	8	10
4930404I05Rik	33	18	24	8	30	18	15	3	38	7	18	30
4930404N11Rik	153	146	152	61	201	164	154	40	125	61	143	140
4930405A21Rik	11	5	6	5	9	11	0	5	7	8	6	13
4930405D11Rik	0	0	0	0	0	0	0	0	0	0	0	0
4930405G09Rik	0	0	0	0	1	0	1	0	2	0	0	0
4930405H06Rik	0	0	0	0	0	0	0	0	0	0	0	0
4930405L22Rik	0	0	0	0	0	0	0	0	0	0	0	0
4930405N21Rik	0	0	0	0	0	0	0	0	0	0	0	0
4930405O22Rik	61	80	88	46	65	100	76	16	99	43	65	45
4930406D18Rik	1	1	2	1	2	2	0	0	2	2	2	3
4930407G08Rik	0	0	0	0	0	0	0	0	0	0	0	0
4930407I10Rik	0	0	0	0	0	0	0	0	0	0	0	0
4930408K08Rik	0	0	0	0	0	0	0	0	0	0	0	0
4930408O17Rik	0	0	0	0	1	0	0	0	0	0	0	0
4930412B13Rik	0	0	0	0	0	0	0	0	1	0	0	0
4930412C18Rik	16	9	11	1	26	25	20	8	33	4	16	16
4930412E21Rik	0	0	0	0	0	0	0	0	0	0	0	0
4930412F09Rik	0	0	0	0	0	0	0	0	0	0	0	0
4930412L05Rik	0	2	0	3	1	1	1	0	0	0	1	3
4930412M03Rik	67	91	59	44	56	118	64	25	64	35	62	83
4930412O13Rik	0	0	1	1	0	1	1	2	0	0	0	1
4930413E15Rik	0	0	0	0	0	0	0	0	0	0	0	0
4930413G21Rik	37	35	36	20	40	70	31	8	37	34	44	47
4930415F15Rik	12	9	5	4	5	0	11	3	5	18	9	3
4930415H17Rik	0	0	0	0	0	0	0	0	0	0	0	0
4930415L06Rik	0	0	0	0	0	0	0	0	0	0	0	0
4930415O20Rik	1	0	1	0	0	0	0	0	1	0	0	0
4930417H01Rik	2	9	3	10	0	2	0	1	4	4	3	14
4930417O13Rik	9	6	9	4	8	3	6	3	11	3	1	5
4930417O22Rik	3	0	1	0	1	0	0	0	2	1	1	0
4930419G24Rik	0	0	0	0	0	0	0	0	0	0	0	0
4930420N18Rik	0	0	0	0	0	0	0	0	0	0	0	0
4930421C12Rik	0	0	0	0	0	0	0	0	0	0	0	0
4930421P07Rik	0	0	0	2	0	0	0	0	0	0	0	0
4930422M22Rik	11	0	13	2	30	20	31	2	18	1	8	13
4930423C22Rik	0	0	0	0	0	0	0	0	0	0	0	0
4930423M02Rik	0	0	0	0	0	0	0	0	1	0	0	0
4930425K10Rik	1	0	0	0	0	0	0	0	0	0	0	0
4930425L21Rik	0	0	0	0	0	0	0	0	0	0	0	0
4930425O10Rik	0	0	0	0	0	0	0	0	0	0	0	0
4930426D05Rik	0	0	0	1	0	0	0	0	0	0	0	0
4930426I24Rik	8	4	0	0	2	1	1	0	2	1	2	2
4930426L09Rik	13	9	7	10	11	21	11	2	12	4	7	12
4930427A07Rik	55	186	240	40	49	113	71	5	134	265	296	91
4930428N03Rik	0	0	0	0	0	0	0	0	0	0	0	0
4930428O21Rik	1	0	0	0	1	0	1	0	0	0	0	1
4930429D17Rik	0	0	0	0	0	0	0	0	0	0	0	0
4930429F24Rik	2	0	1	5	2	1	0	0	1	3	5	10
4930429H19Rik	0	0	0	0	0	0	0	0	0	0	0	0
4930429P21Rik	0	0	0	0	0	0	0	0	0	0	0	0
4930430A15Rik	0	0	0	0	0	0	0	0	0	0	0	0
4930430E12Rik	333	354	333	293	268	506	341	62	451	284	296	591
4930430F08Rik	70	70	89	44	103	128	122	20	81	81	92	73
4930430O22Rik	0	0	0	1	0	0	0	0	0	0	0	0
4930431F12Rik	0	0	0	0	0	0	0	0	0	0	0	0
4930431L21Rik	0	1	0	0	0	0	0	0	0	0	0	0
4930431P03Rik	5	2	1	0	2	0	2	0	1	2	0	1
4930431P19Rik	34	34	15	11	33	33	19	7	21	7	22	24
4930432B10Rik	12	9	25	13	26	22	18	2	21	13	20	12
4930432E11Rik	0	0	0	0	0	0	0	0	0	0	0	2
4930432H08Rik	0	0	0	0	0	0	0	0	0	0	0	0
4930432K21Rik	8	0	2	2	9	1	4	0	1	9	6	2
4930432L08Rik	0	0	0	0	0	0	1	0	0	0	0	0
4930432M17Rik	0	0	0	0	0	0	0	0	0	1	0	0
4930433B08Rik	0	0	0	0	0	0	0	0	0	0	0	0
4930433I11Rik	0	0	0	0	0	0	0	0	0	0	0	0
4930433J02Rik	0	0	0	0	0	0	0	0	0	0	0	0
4930433N12Rik	0	0	0	0	0	0	0	0	0	0	0	0
4930434B07Rik	0	0	0	0	0	0	0	0	0	0	0	0
4930434O05Rik	1	0	0	0	0	0	0	0	0	0	0	0
4930435C17Rik	0	0	0	0	0	0	0	0	0	0	0	0
4930435E12Rik	0	0	0	0	0	0	0	0	0	0	0	0
4930435N07Rik	1	0	0	0	0	0	0	0	0	0	0	0
4930438A08Rik	0	1	0	0	0	0	1	0	0	0	0	1
4930438E09Rik	0	0	0	0	0	0	0	0	0	0	0	0
4930439A04Rik	31	29	53	20	30	7	12	3	47	9	54	20
4930439D14Rik	2	1	0	0	1	0	1	1	0	0	0	1
4930440C22Rik	0	0	0	0	0	0	0	0	0	0	0	0
4930440I19Rik	0	1	1	3	0	0	1	0	0	1	1	2
4930441H08Rik	0	0	0	0	0	0	0	0	0	0	0	0
4930441J16Rik	0	0	0	0	0	0	0	0	0	0	0	0
4930442H23Rik	25	7	12	15	14	6	6	2	21	5	12	16
4930442J19Rik	0	0	0	0	0	0	0	0	0	0	0	0
4930442L01Rik	1	0	1	0	0	0	0	0	1	4	0	0
4930442P19Rik	0	0	0	0	0	0	0	0	0	0	0	0
4930443G03Rik	0	0	0	0	0	0	0	0	0	0	0	0
4930443O20Rik	2	2	0	1	3	0	0	0	0	0	0	1
4930444A19Rik	49	26	58	31	19	23	19	2	52	19	48	27
4930444E06Rik	5	5	13	0	2	0	2	0	5	3	7	2
4930444G20Rik	0	0	0	0	0	0	0	0	0	0	0	2
4930444M15Rik	2	0	0	0	0	0	0	0	0	0	1	1
4930444P10Rik	1	0	0	1	0	0	1	0	0	0	0	0
4930445B16Rik	0	0	0	0	0	0	0	0	0	0	0	0
4930445N08Rik	0	0	0	0	1	0	0	0	0	0	0	0
4930445N18Rik	14	13	13	3	21	19	8	0	12	4	15	11
4930447A16Rik	1	6	3	3	9	10	21	1	8	0	1	3
4930447C04Rik	0	0	0	0	0	0	0	0	0	0	0	0
4930447C11Rik	0	0	0	0	0	0	0	0	0	0	0	0
4930447F04Rik	0	0	0	0	0	0	0	0	0	0	0	0
4930447F24Rik	1	0	1	0	0	0	0	0	0	0	0	2
4930447M23Rik	8	8	11	5	1	2	1	0	15	1	2	3
4930447N08Rik	0	0	1	1	0	0	0	0	0	0	0	0
4930448A20Rik	1	0	1	0	0	0	0	0	1	0	0	1
4930448D08Rik	0	0	0	0	0	0	0	0	0	0	0	0
4930448E22Rik	0	0	0	0	0	0	0	0	1	0	0	0
4930448H16Rik	1	1	0	0	0	0	1	0	1	1	0	0
4930448I06Rik	0	0	0	0	0	0	0	0	0	0	0	0
4930448I18Rik	0	0	0	0	0	0	0	0	0	0	0	0
4930448K20Rik	0	0	0	0	0	0	0	0	0	0	0	0
4930449A18Rik	0	0	0	0	0	0	0	0	0	0	0	0
4930449E01Rik	0	0	0	0	0	0	1	0	0	0	0	1
4930449I04Rik	5	2	1	4	0	0	0	0	0	3	3	4
4930449I24Rik	0	0	0	0	0	0	0	0	0	0	0	0
4930451E10Rik	3	3	3	0	4	5	2	0	5	1	2	0
4930451G09Rik	5	2	3	0	2	5	1	0	6	1	1	1
4930451I11Rik	0	2	0	0	0	1	0	0	0	0	0	0
4930452B06Rik	1	0	0	0	0	0	1	0	0	0	0	0
4930452N14Rik	1	0	0	0	0	0	0	0	0	0	0	0
4930453H23Rik	0	0	0	0	0	0	0	0	0	0	0	0
4930453L07Rik	0	0	0	0	0	0	0	0	0	0	0	0
4930453N24Rik	341	466	404	236	357	456	440	57	401	456	486	476
4930453O03Rik	0	0	0	0	0	0	0	0	0	0	0	0
4930455B14Rik	0	0	0	0	0	0	0	0	0	0	0	0
4930455D15Rik	1	1	1	2	1	6	1	0	0	0	1	0
4930455G09Rik	27	11	18	8	13	1	13	0	28	15	17	30
4930455H04Rik	0	0	0	0	0	0	0	0	0	0	0	0
4930456G14Rik	0	5	1	0	0	2	1	0	1	0	2	0
4930456L15Rik	0	0	0	0	0	0	0	0	0	0	0	0
4930458D05Rik	6	4	3	0	6	7	3	0	3	0	2	4
4930459L07Rik	0	0	0	0	0	0	0	0	0	0	0	0
4930461C15Rik	0	0	0	1	0	0	0	1	0	0	0	2
4930461G14Rik	2	3	1	0	0	11	12	0	2	0	3	1
4930463O16Rik	0	1	0	0	1	2	2	1	4	2	0	0
4930465K10Rik	5	5	3	0	7	10	9	2	7	5	8	3
4930465M20Rik	0	0	0	0	0	0	0	0	0	0	0	0
4930466I24Rik	1	0	0	0	0	0	0	0	0	0	0	0
4930467D21Rik	0	0	0	0	0	0	0	0	0	0	0	1
4930467E23Rik	0	0	1	0	0	0	0	0	1	1	1	0
4930467K11Rik	1	3	0	0	2	0	2	1	3	0	0	1
4930469B13Rik	0	0	0	0	0	0	0	0	0	0	0	0
4930469G21Rik	1	0	0	0	0	0	0	0	0	0	0	0
4930469K13Rik	63	28	46	50	57	51	44	15	70	27	41	90
4930470B04Rik	0	0	0	0	0	0	0	0	0	0	0	0
4930470G03Rik	1	0	1	0	0	2	1	0	2	0	0	2
4930470P17Rik	0	0	0	0	0	0	0	0	0	0	0	0
4930471C04Rik	1	4	0	0	2	0	0	0	2	0	0	1
4930471C06Rik	0	0	0	0	0	0	0	0	0	0	0	0
4930471D02Rik	0	0	0	0	0	1	0	0	0	0	0	0
4930471M09Rik	3	2	1	0	2	4	0	0	1	5	0	2
4930473A02Rik	46	14	34	10	34	20	38	5	51	19	25	19
4930473D10Rik	0	0	0	0	0	0	0	0	0	0	0	0
4930474B08Rik	0	0	0	0	0	0	0	0	0	0	0	0
4930474H06Rik	0	0	0	0	0	0	0	0	0	0	0	0
4930474N05Rik	0	0	0	0	0	0	0	0	0	0	0	0
4930477E14Rik	0	0	0	0	0	0	0	0	0	0	0	0
4930477O15Rik	1	2	0	0	3	3	6	2	3	0	2	0
4930478K11Rik	0	0	0	0	0	0	0	0	0	0	0	0
4930478M09Rik	0	0	0	0	1	0	0	0	1	0	1	0
4930478P22Rik	0	0	0	0	0	0	0	0	0	0	0	0
4930479D17Rik	1	0	0	0	0	0	0	0	1	0	1	0
4930480E11Rik	0	0	0	0	0	0	0	0	0	0	0	0
4930480G23Rik	0	0	0	0	0	0	0	0	0	0	0	0
4930480K02Rik	0	0	0	0	0	0	0	0	0	0	0	0
4930480K15Rik	0	0	1	1	0	3	0	0	0	0	0	0
4930480K23Rik	20	15	18	3	32	18	27	7	13	5	13	15
4930481A15Rik	33	20	16	12	44	1	18	10	29	7	10	32
4930481B07Rik	12	14	9	4	13	12	4	1	11	10	16	5
4930483J18Rik	5	4	3	0	10	7	5	0	4	0	0	2
4930483K19Rik	2	1	1	0	2	2	3	1	1	1	3	3
4930486F22Rik	0	0	0	0	0	0	0	0	0	0	0	0
4930486I03Rik	0	0	0	0	0	0	0	0	0	0	0	0
4930486L24Rik	7	0	2	11	1	0	1	0	2	0	1	5
4930486N12Rik	0	0	0	0	0	0	0	0	0	0	0	0
4930487D11Rik	0	1	0	0	1	0	0	0	0	0	0	0
4930488B22Rik	1	0	2	0	0	1	0	0	2	0	1	9
4930488N24Rik	0	0	0	0	0	0	0	0	0	0	0	0
4930500F04Rik	0	0	0	0	0	0	0	0	0	0	0	0
4930500F10Rik	7	4	4	5	9	13	5	2	5	11	10	6
4930500L23Rik	1	0	0	1	0	0	0	0	0	0	0	0
4930500M09Rik	7	7	1	4	6	15	4	0	3	4	2	3
4930502C17Rik	0	0	0	0	0	0	0	0	0	0	0	0
4930502E09Rik	10	8	11	10	5	6	2	0	11	5	10	4
4930502E18Rik	0	0	0	0	0	0	0	0	2	0	0	1
4930503B20Rik	0	0	0	0	0	0	0	0	0	0	0	0
4930503E14Rik	0	0	0	0	0	0	0	0	0	0	0	0
4930503H13Rik	0	0	0	0	0	0	0	0	0	0	0	0
4930503L19Rik	370	226	418	100	222	184	234	38	332	285	396	232
4930503O07Rik	0	0	0	0	0	0	0	0	0	0	0	0
4930504D19Rik	0	0	0	0	0	0	0	0	0	0	0	0
4930504O13Rik	0	0	0	0	0	0	0	0	0	0	0	0
4930505A04Rik	0	0	0	0	0	0	0	0	0	0	0	0
4930505G20Rik	0	0	0	0	0	0	0	0	0	0	0	0
4930505K14Rik	0	0	0	0	0	0	0	0	0	0	0	0
4930505M18Rik	0	0	0	0	0	0	0	0	0	0	0	0
4930505N22Rik	13	5	4	1	10	6	4	3	12	5	1	6
4930505O20Rik	0	0	0	0	0	0	0	0	0	0	0	0
4930506C21Rik	26	36	28	22	37	44	37	6	43	12	39	24
4930507D05Rik	20	34	29	18	10	24	15	5	32	27	28	18
4930507D10Rik	0	0	0	0	0	2	0	0	0	0	0	0
4930509E16Rik	3	1	1	2	3	6	1	0	3	0	2	1
4930509G22Rik	4	20	4	16	13	14	8	6	4	5	6	15
4930509H03Rik	50	31	30	15	41	37	22	5	36	28	36	21
4930509J09Rik	0	0	0	0	0	0	0	0	0	0	0	0
4930509K18Rik	0	0	1	0	0	0	0	0	1	0	1	0
4930510E17Rik	0	0	0	0	0	3	0	0	0	0	0	0
4930511A02Rik	0	0	0	0	0	0	0	0	0	0	0	0
4930511E03Rik	0	0	0	0	0	0	0	0	0	0	0	0
4930511M06Rik	3	15	11	10	7	30	18	3	10	7	5	16
4930511M18Rik	0	0	0	0	0	0	0	0	0	0	0	0
4930511O05Rik	0	0	0	0	0	0	0	0	0	0	0	0
4930512B01Rik	15	13	18	0	6	12	13	4	21	7	11	11
4930512H18Rik	7	4	2	8	3	6	1	2	0	3	2	29
4930512M02Rik	0	0	0	0	1	0	0	0	0	0	0	0
4930512P04Rik	11	1	8	6	6	6	2	0	4	5	5	8
4930513D17Rik	0	0	0	0	0	0	0	0	0	0	0	0
4930513N10Rik	47	50	49	33	41	60	47	6	48	28	47	34
4930513N20Rik	24	34	25	19	46	42	44	7	46	29	24	36
4930513O06Rik	0	0	0	0	0	0	0	0	0	0	0	0
4930515B02Rik	1	0	0	0	3	0	1	1	0	2	0	0
4930515G01Rik	19	23	17	16	33	29	17	18	35	15	35	19
4930515G13Rik	0	0	0	0	0	0	0	0	0	0	0	0
4930515G16Rik	0	0	0	0	2	0	0	0	0	0	0	0
4930515L19Rik	0	0	0	0	0	0	0	0	0	0	1	0
4930516B21Rik	17	8	13	14	37	38	49	10	29	0	20	7
4930516K23Rik	0	0	0	0	0	0	0	0	0	0	0	0
4930517E11Rik	0	0	0	0	0	0	0	0	0	0	0	0
4930517G19Rik	168	196	210	49	137	103	113	20	189	84	213	132
4930517J16Rik	0	0	0	0	0	0	0	0	0	0	0	0
4930517L18Rik	1	0	1	0	0	0	0	0	1	2	1	1
4930517O19Rik	0	0	0	0	0	0	0	0	0	0	0	0
4930518C09Rik	0	0	0	0	0	0	0	0	0	0	0	0
4930518I15Rik	11	12	8	4	12	9	14	5	11	4	11	14
4930518I17Rik	0	0	0	0	0	0	0	0	0	0	0	0
4930518J20Rik	1	0	0	0	1	0	0	0	0	0	0	0
4930519A11Rik	0	0	0	0	0	0	0	0	0	0	0	0
4930519D14Rik	0	0	0	0	1	0	0	0	0	0	0	1
4930519E07Rik	0	0	0	0	0	0	0	0	0	0	0	0
4930519F09Rik	3	1	4	1	4	5	4	0	3	0	3	1
4930519F16Rik	0	1	0	0	0	0	0	0	0	0	0	0
4930519F24Rik	0	0	0	0	0	0	0	0	0	0	0	0
4930519G04Rik	2	0	0	0	1	0	0	0	1	0	1	0
4930519H02Rik	0	0	0	0	0	0	0	0	0	0	0	0
4930519L02Rik	0	0	0	0	0	0	0	0	0	0	0	0
4930519P11Rik	1	0	0	1	1	0	1	0	0	0	1	2
4930520M14Rik	6	29	12	6	4	12	6	5	6	4	6	12
4930520O04Rik	27	24	23	20	29	26	18	8	30	9	35	50
4930521E06Rik	0	0	0	0	0	0	0	0	0	0	0	0
4930522H14Rik	0	0	0	0	0	0	0	0	0	0	0	0
4930522L14Rik	41	18	37	9	36	30	43	3	35	29	51	27
4930522N08Rik	0	0	0	0	0	0	0	0	0	0	0	0
4930522O17Rik	5	1	4	3	1	1	1	0	3	6	2	5
4930523C07Rik	322	652	364	358	761	1102	983	220	692	360	382	766
4930524B15Rik	3	2	0	0	0	2	0	0	1	5	0	0
4930524B17Rik	0	0	0	0	0	0	0	0	0	0	0	0
4930524J08Rik	19	23	20	7	13	11	5	0	7	23	23	8
4930524N10Rik	0	0	0	0	0	0	0	0	0	0	0	0
4930524O07Rik	6	27	33	18	10	15	13	6	21	39	32	20
4930524O08Rik	1	0	0	0	0	0	0	0	0	0	0	1
4930525G20Rik	11	4	3	3	10	11	9	1	5	3	9	4
4930526A20Rik	21	20	19	11	12	18	19	4	33	23	25	28
4930526F13Rik	0	0	0	0	0	0	0	0	0	0	0	0
4930526L06Rik	17	12	12	14	9	2	7	6	32	1	9	23
4930526M16Rik	1	0	0	0	0	0	0	0	0	0	0	0
4930527A07Rik	0	0	0	0	0	0	0	0	0	0	0	0
4930527B05Rik	0	0	0	0	0	0	0	0	0	0	0	0
4930527E20Rik	0	5	2	1	3	1	0	0	0	0	0	0
4930527J03Rik	0	0	0	0	0	0	0	0	0	0	0	0
4930528D03Rik	0	1	0	0	0	1	0	0	0	0	0	0
4930528G23Rik	0	0	0	0	0	0	0	0	0	0	0	0
4930528J11Rik	2	1	5	3	2	0	2	0	3	4	1	1
4930528P14Rik	0	0	0	0	0	0	0	0	0	0	0	0
4930529C04Rik	0	1	0	0	0	0	0	0	0	0	0	0
4930529I22Rik	0	0	0	0	0	0	0	0	0	0	0	0
4930532G15Rik	56	26	15	22	33	7	5	6	11	4	10	37
4930532M18Rik	0	0	0	0	0	0	0	0	0	0	0	0
4930533B01Rik	58	39	69	44	64	60	114	18	95	31	57	47
4930533D04Rik	0	0	0	0	0	0	0	0	0	0	0	0
4930533I22Rik	0	0	0	0	0	0	0	0	0	0	0	1
4930533K18Rik	0	0	0	0	0	0	0	0	0	0	0	0
4930533L02Rik	0	0	0	0	0	0	0	0	0	0	0	0
4930533P14Rik	0	0	0	0	0	0	0	0	0	0	0	0
4930534D22Rik	0	3	1	0	1	5	0	0	1	0	0	7
4930535E02Rik	0	0	0	0	0	0	0	0	0	0	0	0
4930535G08Rik	0	0	0	0	0	0	0	0	0	0	0	0
4930535I16Rik	65	27	23	18	23	13	6	4	40	15	38	33
4930535L15Rik	0	0	2	1	3	0	0	1	5	0	1	1
4930535O05Rik	0	0	0	0	0	0	0	0	0	0	0	0
4930537H20Rik	21	30	17	12	26	34	12	4	23	21	28	28
4930538E20Rik	0	0	0	1	0	0	0	0	0	0	0	0
4930538K18Rik	2	2	6	0	2	6	2	2	1	3	1	0
4930539C22Rik	0	0	0	0	0	0	0	0	0	0	0	0
4930539E08Rik	5	8	0	1	18	13	9	9	17	5	5	7
4930539J05Rik	45	41	27	19	33	27	11	6	32	32	30	33
4930539M17Rik	0	0	0	0	0	0	0	0	0	0	0	0
4930540E01Rik	0	0	0	0	0	0	0	0	0	0	0	0
4930540M05Rik	5	6	1	4	4	8	5	0	2	6	3	5
4930542C12Rik	0	0	0	0	0	0	0	0	0	0	0	0
4930542C16Rik	0	0	0	0	0	0	0	0	0	0	0	0
4930544D05Rik	5	3	0	5	1	0	1	1	9	3	1	4
4930544G11Rik	0	0	0	0	0	0	0	0	0	0	0	0
4930544I03Rik	0	0	0	0	2	0	1	0	3	0	2	1
4930544L04Rik	1	0	0	0	0	1	0	0	0	0	0	0
4930544M13Rik	0	0	0	0	0	0	0	0	0	0	0	0
4930545L23Rik	0	0	0	0	0	0	0	0	0	1	0	0
4930546C10Rik	0	0	0	0	0	0	0	0	0	0	0	0
4930547E08Rik	2	1	0	0	1	2	1	0	0	0	0	0
4930547M16Rik	3	1	1	3	3	10	3	0	3	0	2	0
4930548G14Rik	0	0	0	1	0	0	0	0	0	0	0	0
4930548H24Rik	3	0	0	0	1	1	1	0	1	1	2	0
4930548K13Rik	0	0	0	0	0	0	0	0	0	0	0	0
4930549C01Rik	0	0	0	0	0	0	0	0	0	0	0	0
4930550C14Rik	4	1	5	5	6	4	7	2	6	1	1	3
4930550C17Rik	0	0	0	0	0	0	0	0	0	0	0	0
4930550L24Rik	0	0	2	0	0	0	1	0	0	0	0	0
4930551L18Rik	9	3	5	3	4	3	6	2	5	1	5	11
4930551O13Rik	41	57	89	30	34	32	33	11	80	24	53	61
4930552N02Rik	0	0	0	0	0	0	0	0	0	0	0	0
4930552P12Rik	21	17	18	14	23	20	17	3	21	19	30	15
4930553I04Rik	0	0	0	0	0	0	0	0	0	0	0	0
4930553M12Rik	0	0	0	0	0	0	0	0	0	0	0	0
4930553P18Rik	0	0	0	0	0	0	0	0	0	0	0	0
4930554C24Rik	0	0	0	0	0	0	0	0	0	0	0	0
4930554G22Rik	0	0	0	0	0	0	0	0	0	0	0	0
4930554G24Rik	0	0	0	0	0	0	0	0	0	0	0	0
4930554H23Rik	0	0	0	0	0	0	0	0	0	0	0	0
4930555A03Rik	12	2	10	1	9	8	5	2	9	12	10	4
4930555B11Rik	0	0	0	0	0	0	0	0	0	1	0	0
4930555B12Rik	0	0	0	0	0	0	0	0	0	0	0	0
4930555F03Rik	0	0	0	0	0	0	0	0	0	0	0	0
4930555G01Rik	0	0	0	0	0	0	0	0	0	0	0	0
4930555K19Rik	0	0	0	0	0	0	0	0	0	0	0	0
4930555M17Rik	0	0	0	0	0	0	0	0	0	0	0	0
4930555O08Rik	0	0	0	0	0	0	0	0	0	0	0	0
4930556G01Rik	0	0	0	0	0	0	0	0	0	0	0	0
4930556G22Rik	0	0	0	0	0	0	0	0	0	0	0	0
4930556I23Rik	1	0	1	0	1	0	0	2	2	0	0	0
4930556J24Rik	1	9	3	5	3	2	0	0	2	3	3	4
4930556L07Rik	0	0	0	0	0	0	0	0	0	0	0	0
4930556M19Rik	62	54	26	20	125	136	144	25	68	27	31	45
4930556N13Rik	11	8	11	4	3	6	13	3	13	6	11	8
4930557A04Rik	0	0	0	0	0	0	0	0	0	0	0	0
4930557B06Rik	0	0	0	0	1	0	0	0	0	1	0	1
4930557F10Rik	0	0	0	0	0	0	0	0	0	1	0	0
4930557J02Rik	1	0	1	0	2	0	0	0	3	5	1	0
4930558C23Rik	0	0	0	0	0	0	0	0	0	0	0	0
4930558F17Rik	0	0	0	0	0	0	0	0	0	0	0	0
4930558G05Rik	0	0	0	0	0	0	0	0	0	0	0	0
4930558J18Rik	2	10	11	0	2	3	5	0	2	9	11	2
4930558J22Rik	5	4	0	3	2	10	0	1	0	0	0	5
4930558K02Rik	2	0	1	2	0	0	1	0	0	0	0	1
4930558N11Rik	0	0	0	0	0	0	0	0	0	0	0	0
4930560O18Rik	1	1	0	5	2	2	1	0	1	0	1	8
4930562A09Rik	0	0	0	0	0	0	0	0	0	0	0	0
4930562C15Rik	66	23	47	8	38	17	14	8	51	18	27	40
4930562D21Rik	0	0	0	0	0	0	0	0	0	0	0	0
4930562F07Rik	3	7	5	13	3	18	10	3	4	4	12	18
4930562F17Rik	0	0	0	0	0	0	0	0	0	0	0	0
4930563D23Rik	0	0	0	0	0	4	0	0	0	0	1	0
4930563E18Rik	2	1	2	0	6	2	1	0	4	3	0	1
4930563E22Rik	4	1	1	2	5	1	2	0	4	0	0	0
4930563F08Rik	0	0	0	0	0	0	0	0	0	0	0	0
4930563H07Rik	0	0	0	0	0	0	0	0	0	0	1	0
4930563I02Rik	0	0	0	0	0	2	0	0	0	0	0	0
4930563M21Rik	0	0	0	0	0	0	2	0	0	0	0	0
4930564D02Rik	1	0	0	0	0	2	1	0	0	0	0	0
4930565D16Rik	0	0	0	0	0	0	0	0	0	0	0	0
4930565N06Rik	148	71	119	125	173	117	205	47	163	51	106	166
4930566F21Rik	0	0	0	0	0	0	0	0	0	0	0	0
4930566N20Rik	0	0	0	0	0	0	0	0	0	0	0	0
4930567H17Rik	0	0	0	0	0	0	0	0	0	0	0	0
4930568A12Rik	10	1	10	4	8	0	3	1	4	1	3	5
4930568D16Rik	0	0	0	0	1	0	0	0	0	0	0	0
4930568G15Rik	0	0	0	0	0	0	0	0	0	0	0	0
4930569F06Rik	0	0	0	0	0	0	0	0	0	0	0	0
4930570D08Rik	0	0	0	0	0	0	0	0	0	0	0	0
4930570G19Rik	0	0	0	0	0	0	0	0	1	0	0	0
4930570N18Rik	1	0	0	0	0	0	1	0	0	0	0	0
4930571K23Rik	0	0	0	0	0	0	0	0	0	0	0	0
4930571N24Rik	0	0	0	0	0	0	0	0	0	0	0	0
4930572K03Rik	0	0	0	0	0	0	0	0	0	0	0	0
4930572O03Rik	0	0	0	0	0	0	0	0	0	0	0	0
4930573C15Rik	0	0	0	0	0	1	0	0	0	0	0	0
4930573I07Rik	0	0	0	0	0	0	0	0	0	0	0	0
4930577H14Rik	0	0	0	0	0	0	0	0	0	0	1	0
4930577N17Rik	102	91	141	66	79	95	96	18	141	74	130	107
4930578C19Rik	0	1	0	0	0	0	0	0	0	0	0	0
4930578G10Rik	0	0	0	0	0	0	0	0	0	0	0	0
4930578I06Rik	0	0	0	0	0	0	0	0	0	0	0	0
4930578I07Rik	2	0	0	0	4	0	0	1	0	0	1	0
4930578M01Rik	5	9	3	5	1	3	1	0	4	3	3	6
4930579C12Rik	4	3	4	5	2	2	5	0	6	7	6	6
4930579D09Rik	0	0	0	0	0	0	0	0	0	0	0	0
4930579F01Rik	0	0	0	0	0	0	0	0	0	0	0	0
4930579G18Rik	91	99	105	52	88	96	92	14	101	70	99	83
4930579G24Rik	42	75	109	15	44	67	65	5	81	142	132	41
4930579H20Rik	0	0	0	0	0	0	0	0	0	0	0	0
4930579K19Rik	9	7	4	0	3	7	8	3	10	1	7	10
4930579M01Rik	0	0	0	0	0	0	0	0	0	0	0	0
4930579O11Rik	1	0	3	0	0	0	0	0	0	1	3	0
4930580E04Rik	3	2	0	3	0	2	3	0	2	4	0	0
4930581F22Rik	14	15	18	6	12	17	9	5	18	13	23	31
4930583I09Rik	0	0	0	0	0	0	0	0	0	0	0	0
4930583K01Rik	0	6	1	0	3	0	1	0	0	0	0	0
4930583P06Rik	0	0	0	0	0	0	0	0	0	0	0	0
4930584F24Rik	0	0	0	0	0	0	0	0	0	0	0	0
4930586N03Rik	0	0	0	0	0	0	0	0	0	1	0	0
4930587A21Rik	0	0	0	0	0	0	0	0	0	0	0	0
4930588G17Rik	1	3	0	0	1	1	1	0	0	2	1	5
4930588K23Rik	0	0	0	0	0	0	0	0	0	0	0	0
4930589L23Rik	84	25	35	26	53	26	17	7	43	28	45	67
4930589O11Rik	21	5	5	3	7	5	3	0	6	1	2	4
4930589P08Rik	1	0	0	0	1	0	0	0	0	1	0	1
4930590H14Rik	0	0	0	0	0	0	0	0	0	0	0	0
4930590J08Rik	21	23	19	9	18	13	10	1	15	5	10	13
4930590L14Rik	0	0	0	0	0	0	0	0	0	0	0	0
4930590L20Rik	0	0	0	0	0	0	0	0	0	0	0	0
4930591A17Rik	0	0	0	0	0	0	0	0	0	1	0	0
4930593A02Rik	2	2	1	4	4	1	2	0	3	2	4	7
4930593C16Rik	1	0	0	0	0	0	0	0	0	0	0	2
4930594C11Rik	26	49	40	35	23	47	42	10	46	14	47	29
4930594M17Rik	0	0	0	0	0	0	0	0	0	0	0	0
4930594M22Rik	3	6	11	0	8	2	11	1	4	7	3	5
4930594O21Rik	0	0	0	0	0	0	0	0	0	0	0	1
4930595D18Rik	121	220	170	99	93	132	97	31	133	121	141	154
4930595M18Rik	0	0	0	0	0	0	0	0	0	0	0	0
4930595O18Rik	0	0	0	0	0	0	0	0	0	0	0	0
4930596D02Rik	0	0	0	0	0	0	0	0	0	0	0	0
4930596I21Rik	46	94	101	40	33	59	58	15	104	57	110	45
4930597A21Rik	0	0	0	0	0	0	1	0	2	0	0	0
4930597L12Rik	1	0	0	0	0	0	0	0	0	0	0	0
4930597O21Rik	6	4	3	4	2	2	2	3	4	2	3	2
4930598A11Rik	2	1	2	0	3	1	1	0	1	0	0	1
4930598F16Rik	0	0	0	0	0	0	0	0	1	0	0	0
4930598N05Rik	3	7	17	33	1	1	5	2	2	13	10	20
4930599A14Rik	0	0	0	0	0	0	0	0	0	0	0	0
4930599N23Rik	21	19	11	12	32	22	21	10	24	10	17	52
4930599N24Rik	39	53	40	16	38	72	37	9	54	43	49	45
4931400O07Rik	0	0	0	0	0	0	0	0	0	0	0	0
4931403E22Rik	14	8	15	4	9	5	3	2	19	9	13	8
4931403G20Rik	14	31	15	12	11	35	10	3	36	13	15	10
4931403M11Rik	0	0	0	0	0	0	0	0	0	0	0	0
4931406B18Rik	1	4	0	0	2	0	0	1	1	1	2	0
4931406C07Rik	571	333	406	269	575	519	527	130	580	292	396	511
4931406G06Rik	10	8	11	2	11	5	2	1	7	5	7	6
4931406P16Rik	496	515	541	289	460	805	616	142	552	371	555	544
4931408C20Rik	0	0	0	0	0	0	0	0	0	0	0	0
4931409K22Rik	1	2	0	2	1	2	1	0	1	0	0	0
4931412I15Rik	0	0	0	0	0	0	0	0	0	0	0	0
4931413I07Rik	1	0	0	0	0	0	0	0	0	0	0	0
4931413K12Rik	182	129	60	59	152	89	73	39	110	64	72	111
4931414P19Rik	62	39	84	38	72	71	98	15	78	31	74	35
4931415C17Rik	7	4	2	0	1	0	1	0	1	0	1	1
4931417E11Rik	0	0	0	0	0	0	0	0	0	0	0	0
4931419H13Rik	0	0	0	0	0	0	0	0	0	0	0	0
4931422A03Rik	90	76	55	38	64	35	32	8	71	44	63	57
4931423N10Rik	2	0	0	3	3	0	0	0	1	0	1	0
4931428F04Rik	25	62	56	43	33	78	75	24	31	37	54	49
4931428L18Rik	0	0	0	0	1	0	0	0	1	0	0	1
4931429L15Rik	4	5	1	0	2	3	1	0	1	0	0	1
4931429P17Rik	0	0	0	0	0	0	0	0	0	0	0	0
4931431B13Rik	0	0	0	0	0	1	0	0	0	0	0	0
4931431C16Rik	17	13	19	5	16	8	16	1	22	11	19	11
4931431F19Rik	0	0	0	0	0	0	0	0	0	0	0	0
4931440F15Rik	7	4	10	1	6	6	7	0	13	2	11	7
4931440J10Rik	3	0	0	5	4	1	1	0	1	0	1	0
4931440P22Rik	390	216	251	142	320	253	176	48	293	179	223	339
4932411E22Rik	0	0	0	2	0	0	0	0	0	0	0	0
4932411K12Rik	0	0	0	0	0	0	0	0	0	0	0	0
4932411N23Rik	0	0	0	0	0	0	0	0	0	0	0	0
4932412D23Rik	0	0	0	0	0	0	0	0	0	0	1	0
4932413F04Rik	0	0	0	0	0	0	0	0	0	0	0	0
4932414J04Rik	0	0	0	0	0	0	0	0	0	0	0	0
4932414N04Rik	0	0	0	0	0	0	0	0	0	0	0	0
4932415D10Rik	0	0	0	0	0	0	0	0	0	0	0	0
4932415M13Rik	0	0	0	0	0	0	0	0	0	0	0	0
4932416K20Rik	0	0	0	0	0	0	0	0	1	0	0	0
4932422M17Rik	28	23	14	9	51	18	22	11	18	5	20	21
4932429P05Rik	0	0	0	0	0	0	0	0	0	0	0	0
4932430I15Rik	0	0	0	0	0	0	0	0	0	0	0	0
4932431L22Rik	0	0	0	0	0	0	0	0	0	0	0	0
4932431P20Rik	0	0	0	0	0	0	0	0	0	0	1	0
4932435O22Rik	0	0	0	0	0	0	0	0	0	0	0	0
4932438A13Rik	3321	3050	3685	2171	3161	3193	3221	890	3948	2225	3445	3604
4932438H23Rik	20	14	20	34	20	15	22	13	26	24	18	36
4932441J04Rik	50	99	68	29	95	128	98	22	57	64	56	67
4932442E05Rik	115	103	94	136	146	113	92	42	116	103	126	197
4932443I19Rik	1	2	0	0	2	4	1	0	1	1	6	3
4932443L11Rik	6	23	9	10	14	22	21	1	13	14	10	29
4932702P03Rik	1	4	0	0	0	0	0	0	1	0	0	2
4933400A11Rik	0	0	0	0	0	0	0	1	0	0	0	0
4933400C23Rik	1	0	0	0	0	0	0	0	0	0	0	0
4933400F21Rik	192	194	150	56	302	454	368	61	330	153	136	140
4933401B06Rik	0	0	0	0	0	0	0	0	0	0	0	0
4933401H06Rik	5	8	5	3	2	1	5	0	4	6	7	9
4933401J01Rik	0	0	0	0	0	0	0	0	0	0	0	0
4933402C05Rik	0	0	0	0	0	0	0	0	0	0	0	0
4933402C06Rik	0	0	0	0	0	0	0	0	0	0	0	0
4933402D24Rik	3	5	4	0	4	0	1	0	1	1	1	1
4933402E13Rik	0	0	0	0	0	0	0	0	0	0	0	0
4933402J07Rik	0	0	0	0	0	0	0	0	0	0	0	0
4933402J10Rik	0	0	0	0	0	0	0	0	0	0	0	0
4933402N03Rik	0	0	0	0	0	0	0	0	0	0	0	0
4933402N22Rik	0	0	0	0	0	0	0	0	0	0	0	0
4933402P03Rik	1	0	0	0	0	0	0	0	1	0	4	3
4933403L11Rik	0	0	0	0	0	0	1	0	1	0	0	0
4933403O08Rik	0	0	1	0	0	0	0	0	0	0	0	0
4933404I11Rik	0	0	0	0	0	0	0	0	0	0	0	0
4933404K08Rik	0	0	0	0	0	0	0	0	0	0	0	0
4933404O12Rik	40	24	33	6	26	20	19	0	33	54	26	21
4933405D12Rik	0	6	3	0	0	1	1	0	3	0	1	4
4933405E24Rik	1	0	0	0	0	2	0	0	0	0	0	0
4933405L10Rik	0	0	0	0	0	0	1	0	1	0	0	0
4933405O20Rik	0	0	0	0	0	0	0	0	0	0	0	0
4933406C10Rik	8	10	2	6	10	6	8	3	19	3	5	8
4933406D12Rik	0	0	0	0	0	0	0	0	0	0	0	0
4933406F09Rik	0	0	0	0	0	0	0	0	0	0	0	0
4933406G16Rik	0	0	0	0	0	0	0	0	0	0	0	0
4933406I18Rik	1	2	0	0	1	0	0	0	1	0	0	1
4933406J10Rik	17	11	9	0	14	10	28	5	21	11	13	23
4933406K04Rik	0	0	0	0	0	1	0	0	0	0	0	0
4933406L23Rik	1	2	3	2	0	0	2	1	2	0	3	1
4933406M09Rik	17	7	15	0	14	7	5	1	6	4	8	7
4933406P04Rik	51	32	22	11	41	31	31	7	43	20	30	45
4933407E24Rik	0	0	1	0	1	0	0	0	0	0	0	0
4933407I08Rik	0	0	0	0	0	0	0	0	0	0	0	0
4933407K13Rik	46	19	49	26	32	16	32	4	37	16	33	16
4933407L21Rik	3	10	1	2	4	4	2	0	4	4	1	2
4933408A14Rik	0	0	0	0	1	0	0	0	0	0	0	0
4933408B17Rik	2	7	2	0	7	5	5	2	6	1	6	5
4933408J17Rik	3	2	5	3	0	0	4	0	1	0	4	5
4933408N05Rik	0	0	0	0	0	0	0	0	0	0	0	0
4933409D19Rik	0	0	0	0	0	0	1	0	0	0	0	0
4933409G03Rik	0	0	0	0	0	0	0	0	0	0	0	0
4933411E06Rik	0	0	0	0	0	0	0	0	0	0	0	0
4933411G06Rik	0	0	0	0	0	0	0	0	0	0	0	0
4933411K16Rik	1	4	3	3	1	0	1	0	1	2	0	1
4933411O13Rik	0	0	0	0	0	0	0	0	0	0	0	0
4933412A08Rik	1	1	0	0	1	1	1	0	1	0	3	0
4933412E24Rik	0	0	0	0	0	0	0	0	0	0	0	0
4933412L11Rik	12	4	14	4	3	0	2	0	6	6	6	1
4933413C19Rik	6	5	7	31	6	0	5	7	4	1	4	16
4933413G19Rik	3	1	2	0	0	0	0	0	1	1	2	0
4933413J09Rik	17	17	29	9	22	9	33	9	22	16	23	16
4933413L06Rik	0	0	0	0	0	0	0	0	0	0	0	2
4933414I15Rik	0	0	0	0	0	0	0	0	0	0	0	0
4933415A04Rik	0	0	1	0	0	0	0	0	0	0	0	0
4933415F23Rik	0	0	1	0	0	0	0	0	0	0	0	0
4933415J04Rik	0	0	0	0	0	0	0	0	0	0	0	0
4933416C03Rik	0	0	0	0	0	0	0	0	0	0	0	0
4933416E03Rik	0	0	0	0	0	0	0	0	0	0	0	0
4933416E14Rik	0	0	0	0	0	0	0	0	0	0	0	0
4933416I08Rik	0	0	0	0	0	0	0	0	0	0	0	0
4933416M07Rik	5	41	34	42	10	37	17	17	22	20	33	45
4933417A18Rik	0	0	0	0	0	0	1	0	0	0	0	0
4933417C20Rik	13	10	6	4	12	12	5	3	9	9	11	9
4933417D19Rik	4	9	3	2	1	1	2	0	6	1	0	1
4933417E11Rik	0	0	0	0	0	0	0	0	0	0	0	0
4933417G07Rik	1	2	0	0	2	1	0	0	0	1	0	0
4933417O13Rik	2	2	2	0	1	3	0	0	1	0	0	0
4933421A08Rik	0	1	0	0	0	0	0	0	0	0	0	0
4933421I07Rik	0	0	0	0	0	0	0	0	0	0	1	0
4933421O10Rik	217	105	84	60	198	75	66	22	110	73	87	90
4933423L19Rik	0	0	0	0	0	0	0	0	0	0	0	0
4933423P22Rik	686	670	720	444	790	641	757	150	953	450	425	749
4933424G06Rik	14	15	13	4	21	11	11	6	10	7	12	8
4933424H11Rik	0	0	0	0	0	0	0	0	0	0	0	0
4933424L21Rik	11	16	13	11	7	4	4	0	7	8	16	17
4933424M12Rik	4	2	8	0	2	1	2	2	2	1	7	1
4933424N20Rik	0	0	0	0	0	0	0	0	0	0	0	0
4933425D22Rik	0	0	0	0	0	0	0	0	0	0	0	0
4933425L06Rik	3	0	1	0	3	0	1	0	0	1	1	0
4933425M03Rik	0	1	0	0	1	0	0	0	1	0	1	0
4933426K07Rik	25	28	36	36	11	18	10	2	12	20	21	45
4933427D06Rik	2	0	0	2	0	2	0	3	1	0	1	0
4933427D14Rik	221	123	177	63	155	167	172	27	179	137	187	140
4933427E11Rik	1	2	0	0	0	2	0	0	1	2	0	1
4933427E13Rik	1	1	1	0	0	1	0	0	1	0	0	0
4933427G23Rik	3	2	3	2	9	4	3	0	6	6	5	1
4933427I04Rik	4	1	0	0	1	0	2	0	4	0	1	3
4933427I22Rik	0	0	0	0	0	0	0	0	0	0	0	0
4933427J07Rik	0	0	0	0	0	0	0	0	0	0	0	2
4933428C19Rik	0	0	0	0	0	0	0	0	0	0	0	0
4933428G20Rik	14	9	10	3	14	7	12	0	15	1	10	16
4933428M09Rik	0	0	0	0	0	0	0	0	0	0	0	0
4933428P19Rik	6	7	5	0	2	1	3	0	3	3	4	0
4933429H19Rik	17	20	8	0	9	9	3	0	9	4	14	7
4933430H06Rik	0	0	0	0	0	0	0	2	0	0	0	0
4933430H16Rik	0	0	0	0	0	0	0	0	0	0	0	0
4933430I17Rik	29	8	9	18	7	8	9	0	42	4	3	24
4933430L12Rik	13	15	12	7	16	15	13	4	16	16	28	15
4933430M04Rik	0	0	0	0	0	0	0	0	0	0	0	0
4933430N04Rik	0	0	0	0	0	0	0	0	0	0	0	0
4933431C10Rik	32	14	44	15	42	17	40	11	59	11	38	24
4933431E20Rik	5	1	2	0	1	0	1	1	4	2	3	3
4933431G14Rik	29	48	38	34	27	6	13	10	43	32	29	41
4933431K14Rik	13	16	11	10	10	16	3	2	14	33	22	16
4933431K23Rik	1	0	1	0	0	0	0	0	0	0	0	2
4933431M02Rik	0	0	0	0	0	0	0	0	0	0	0	0
4933432K03Rik	0	0	0	0	0	0	0	0	0	0	0	0
4933433F19Rik	0	0	0	0	0	0	0	0	0	0	0	0
4933433G15Rik	87	53	44	53	88	44	38	12	61	34	46	79
4933434E20Rik	553	580	603	303	547	789	757	154	729	538	699	631
4933434M16Rik	0	0	0	0	0	0	0	0	0	0	0	0
4933435F18Rik	0	0	0	0	0	0	0	0	0	0	0	0
4933435G04Rik	0	0	0	0	0	0	0	0	0	0	0	0
4933436E23Rik	0	0	0	0	0	0	0	0	0	0	0	0
4933436F18Rik	0	0	0	0	0	0	0	0	0	0	0	0
4933436H12Rik	0	0	0	0	0	0	1	0	0	0	0	0
4933436I01Rik	0	0	0	0	0	0	0	0	0	0	0	0
4933436I20Rik	2	0	0	0	0	1	1	0	0	0	0	0
4933437G19Rik	35	12	7	4	37	38	14	4	7	3	2	20
4933438A12Rik	1	0	0	0	0	0	0	0	1	2	0	0
4933438B17Rik	0	0	0	0	0	0	0	0	0	0	0	0
4933438K21Rik	0	0	0	0	0	0	0	0	0	0	0	0
4933439C10Rik	154	95	104	107	193	133	125	53	120	66	111	132
4933439J24Rik	0	0	0	0	0	0	0	0	0	0	0	0
4933439K11Rik	65	40	44	17	92	65	67	15	65	20	43	69
4933439N06Rik	0	0	0	0	0	0	0	0	0	0	0	0
4933440J02Rik	0	0	0	0	0	0	0	0	0	0	0	1
4933440M02Rik	0	0	0	0	0	1	0	0	0	0	0	0
4933440N22Rik	109	129	102	57	91	81	52	17	97	90	108	142
5031410I06Rik	0	0	0	0	0	0	0	0	0	0	0	0
5031414D18Rik	129	29	51	38	49	17	13	0	76	40	38	30
5031415H12Rik	16	16	9	17	7	14	4	6	9	16	10	33
5031425E22Rik	516	328	356	254	442	350	269	104	414	322	331	481
5031425F14Rik	56	23	28	22	34	20	10	5	31	20	23	33
5031434C07Rik	0	0	0	0	0	0	1	0	0	0	0	1
5031434O11Rik	126	71	61	66	112	62	52	19	111	51	67	67
5031439G07Rik	8327	9821	10731	6583	9121	18068	15166	2659	12726	6614	10333	10224
5033403F01Rik	2	1	0	1	5	4	1	2	1	0	2	1
5033403H07Rik	0	0	0	0	0	0	0	0	0	0	0	0
5033404E19Rik	0	0	0	0	0	0	0	0	0	0	0	0
5033417F24Rik	20	8	7	11	13	14	5	3	9	6	6	15
5033423K11Rik	0	0	0	0	0	0	0	0	0	0	0	0
5033426O07Rik	0	0	0	0	0	0	0	0	0	0	0	0
5033428I22Rik	0	1	0	0	0	0	0	1	0	0	1	0
5033430I15Rik	41	18	14	9	46	55	24	6	32	15	17	22
5330406M23Rik	748	757	827	396	449	505	497	82	843	548	955	818
5330411J11Rik	2	0	0	0	0	0	0	0	0	0	0	0
5330411O13Rik	13	2	4	2	1	2	8	1	5	4	10	3
5330413D20Rik	0	0	0	0	0	0	0	0	0	0	0	0
5330413P13Rik	0	1	0	0	0	0	0	0	0	0	0	0
5330416C01Rik	0	0	0	0	0	0	0	0	0	0	0	0
5330417C22Rik	1	2	0	0	0	2	0	2	1	1	0	0
5330417H12Rik	0	0	0	0	0	0	0	0	0	0	0	0
5330425B07Rik	0	0	0	0	0	1	0	0	0	0	0	0
5330426L24Rik	0	1	1	0	0	0	0	0	2	1	0	0
5330429C05Rik	0	0	0	0	0	0	0	0	0	0	0	0
5330434G04Rik	0	0	0	0	0	0	0	0	0	0	0	0
5330437M03Rik	0	0	0	0	0	0	0	0	0	0	0	0
5330438D12Rik	40	33	24	18	55	35	44	18	47	17	34	43
5330438I03Rik	0	0	0	0	0	0	0	0	0	0	0	0
5330439A09Rik	0	0	1	0	0	0	1	0	0	0	0	0
5330439B14Rik	0	0	0	0	0	0	0	0	0	0	0	0
5330439K02Rik	14	7	18	5	24	5	3	4	21	8	21	35
5430400D12Rik	4	6	5	0	7	16	14	6	2	0	3	6
5430401F13Rik	0	0	0	0	0	0	0	0	0	0	0	0
5430402E10Rik	0	0	0	0	0	0	0	0	0	0	0	0
5430402O13Rik	5	3	7	3	8	12	8	0	11	3	3	10
5430403G16Rik	20	7	13	5	9	12	12	2	17	14	16	7
5430405H02Rik	41	15	33	15	35	28	22	6	44	17	52	26
5430416N02Rik	28	37	38	11	38	48	26	6	35	21	30	40
5430416O09Rik	2	0	0	0	0	0	0	0	1	0	0	0
5430419D17Rik	0	0	0	0	0	0	0	0	0	0	0	0
5430420F09Rik	15	40	26	28	35	61	38	9	28	13	21	38
5430427M07Rik	4	8	15	2	10	11	9	0	8	5	16	6
5430427N15Rik	0	0	0	0	0	0	0	0	0	0	0	0
5430427O19Rik	252	124	242	192	102	46	92	30	314	140	234	278
5430433H01Rik	0	0	0	0	0	0	1	0	0	0	0	0
5430434F05Rik	185	185	202	94	169	141	107	48	153	131	165	155
5430434I15Rik	0	0	0	0	0	0	0	0	0	0	0	0
5530400C23Rik	0	0	0	0	0	0	0	0	0	0	0	0
5530400K19Rik	0	0	0	0	0	0	0	0	0	0	0	0
5530401A14Rik	0	0	0	0	0	0	0	0	1	0	0	0
5530601H04Rik	142	135	160	53	118	101	107	22	134	93	146	98
5730403I07Rik	0	0	0	0	0	0	0	0	0	0	0	0
5730405O15Rik	11	8	13	5	17	7	14	9	18	7	16	15
5730408A14Rik	0	0	0	0	0	0	0	0	0	0	0	0
5730409E04Rik	220	146	229	122	157	142	140	24	220	143	190	204
5730412P04Rik	0	0	0	0	0	0	0	0	0	0	0	0
5730416F02Rik	5	10	18	6	6	7	5	2	8	8	9	6
5730419F03Rik	0	0	1	0	0	3	2	0	0	0	0	0
5730420D15Rik	1	0	3	0	1	2	1	1	2	0	4	0
5730422E09Rik	6	2	9	0	2	11	7	3	10	4	11	5
5730435O14Rik	0	0	0	0	0	0	0	0	0	0	0	0
5730437C11Rik	0	0	0	0	0	0	0	0	0	0	0	0
5730455P16Rik	253	257	257	137	266	330	352	66	336	230	274	231
5730460C07Rik	0	0	0	0	0	0	0	0	0	0	0	0
5730480H06Rik	159	113	159	65	178	160	187	17	204	94	157	127
5730488B01Rik	0	0	0	0	0	0	0	0	0	0	0	0
5730507A11Rik	34	41	35	28	29	45	39	23	67	21	24	57
5730507C01Rik	0	0	0	0	0	0	0	0	1	0	1	0
5730508B09Rik	331	344	319	160	455	838	806	109	514	234	291	377
5730522E02Rik	0	1	1	0	1	0	0	0	0	0	0	0
5730559C18Rik	0	1	1	0	0	0	0	1	0	0	0	1
5730585A16Rik	0	0	0	0	0	0	0	0	0	0	0	0
5730596B20Rik	0	0	0	0	0	0	0	0	1	1	0	0
5830405F06Rik	0	0	0	0	0	0	0	0	0	0	0	0
5830411K02Rik	1	0	2	0	0	0	0	0	0	0	0	0
5830411N06Rik	0	0	0	0	0	0	0	0	0	0	0	0
5830415G21Rik	22	8	13	9	10	1	1	1	32	3	8	6
5830416I19Rik	5	2	5	1	2	6	10	5	9	11	5	12
5830417I10Rik	140	117	172	76	130	152	208	24	167	77	143	87
5830418P13Rik	2	1	3	0	3	0	2	0	0	0	1	0
5830432E09Rik	226	376	235	307	300	721	553	127	379	158	223	538
5830437K03Rik	0	0	1	0	0	0	0	0	0	0	1	0
5830444B04Rik	19	1	10	7	16	5	5	3	18	3	9	7
5830444F18Rik	0	2	0	3	3	4	6	0	0	0	0	1
5830454E08Rik	17	4	10	5	7	5	5	2	13	3	15	13
5830462I19Rik	3	13	7	7	1	5	2	0	9	2	2	10
5830468F06Rik	0	0	0	0	0	0	0	0	0	2	0	0
5830473C10Rik	0	3	1	0	0	0	0	0	0	1	0	0
5830487J09Rik	7	2	4	3	4	0	2	2	2	2	4	2
5930403N24Rik	75	29	49	70	42	17	17	17	30	45	38	108
5930409G06Rik	0	0	0	0	0	0	0	0	0	0	0	0
5930412G12Rik	0	0	0	0	0	0	0	0	1	0	0	0
5930420M18Rik	52	71	30	39	51	83	53	16	37	39	49	85
5930422O12Rik	1	0	0	0	1	1	0	0	0	0	0	0
5930430L01Rik	14	1	5	9	3	3	3	4	2	2	4	9
5930435M05Rik	2	0	0	0	0	0	0	0	1	0	0	2
6030400A10Rik	203	185	224	132	147	151	199	25	282	146	260	222
6030407O03Rik	0	0	1	0	0	0	0	0	0	0	0	0
6030408B16Rik	0	0	0	0	2	0	1	0	3	0	1	1
6030419C18Rik	5	7	9	1	19	33	40	1	4	1	4	9
6030442E23Rik	0	0	0	2	0	1	0	0	0	0	0	0
6030442K20Rik	6	5	9	0	6	8	8	0	7	3	8	7
6030443J06Rik	11	7	13	6	12	7	21	2	9	3	11	12
6030445D17Rik	0	0	0	0	0	0	1	0	0	0	1	3
6030452D12Rik	0	0	0	0	0	0	0	0	1	0	0	0
6030458C11Rik	400	365	511	164	437	575	647	114	498	316	478	347
6030460B20Rik	4	14	5	2	7	13	8	1	9	4	10	15
6030468B19Rik	3	0	2	0	4	1	1	1	1	1	1	3
6030469F06Rik	0	0	0	0	0	0	0	0	0	0	0	0
6030471H07Rik	0	0	0	0	0	0	0	0	0	0	0	0
6030498E09Rik	0	0	0	0	0	0	0	0	0	0	0	0
6230400D17Rik	41	75	54	36	55	58	49	12	54	37	46	67
6330403K07Rik	3	1	0	3	1	0	0	0	2	1	3	1
6330403L08Rik	237	206	216	208	260	226	158	73	222	161	225	312
6330403N20Rik	4	13	8	6	6	10	9	1	10	6	9	7
6330408A02Rik	55	32	55	11	57	47	67	18	53	41	51	61
6330409D20Rik	14	17	6	6	5	21	13	2	11	5	10	6
6330410L21Rik	0	0	0	0	0	0	0	0	0	0	0	0
6330415B21Rik	0	0	0	0	0	0	0	0	0	0	0	0
6330418K02Rik	6	4	4	1	9	8	2	0	6	4	4	4
6330419E04Rik	0	0	0	0	0	0	0	0	0	0	0	0
6330549D23Rik	58	65	87	36	73	92	104	10	100	81	102	72
6330562C20Rik	33	11	20	16	16	7	13	0	25	18	14	20
6430500D05Rik	0	0	0	0	0	0	0	0	0	0	0	0
6430503K07Rik	0	0	0	0	0	0	0	0	0	0	0	0
6430511E19Rik	76	82	84	71	81	54	84	24	78	78	112	106
6430531B16Rik	12	6	6	2	6	2	6	1	11	6	10	14
6430548M08Rik	1314	710	1113	781	955	1013	963	228	1437	555	888	988
6430550D23Rik	26	21	12	5	23	22	20	3	16	24	9	18
6430562O15Rik	16	11	28	4	19	13	18	8	26	8	25	21
6430571L13Rik	2	0	1	0	1	5	1	0	0	1	0	1
6430573F11Rik	1	0	0	2	9	16	4	0	1	6	1	1
6430573P05Rik	72	37	45	20	80	106	52	16	71	33	42	41
6430584L05Rik	1	0	0	1	0	0	0	0	0	0	0	0
6430590A07Rik	34	39	38	7	43	38	48	13	46	20	42	32
6430628N08Rik	1	0	0	0	0	0	0	0	1	0	0	0
6430710C18Rik	0	0	0	0	0	0	0	0	0	0	0	0
6530401F13Rik	1	1	2	1	0	2	1	0	0	5	1	0
6530402F18Rik	78	21	62	68	29	20	21	5	58	7	51	84
6530403H02Rik	0	0	0	0	0	0	0	0	0	0	0	0
6530409C15Rik	41	43	54	35	57	81	92	17	69	41	58	59
6530411M01Rik	1	0	0	0	0	0	1	0	0	0	0	0
6530437J22Rik	0	0	1	0	1	2	0	0	0	0	0	0
6720427I07Rik	73	123	92	70	82	106	83	39	99	112	120	144
6720464F23Rik	25	29	25	9	54	34	66	15	30	9	24	15
6720469O03Rik	0	0	0	0	0	0	0	0	0	0	0	0
6720475M21Rik	41	28	46	30	54	62	71	23	63	35	57	41
6720482G16Rik	7	22	16	1	8	17	12	3	12	8	17	5
6720483E21Rik	0	0	0	0	0	0	0	0	0	0	0	0
6720489N17Rik	18	20	38	3	6	4	20	0	24	19	33	12
6820402A03Rik	49	41	48	63	56	33	32	11	51	38	47	74
6820408C15Rik	0	0	1	2	0	0	1	0	0	0	0	0
6820431F20Rik	77	110	93	58	63	110	83	13	77	64	68	97
7330404K18Rik	0	0	0	0	0	0	0	0	0	0	0	0
7330423F06Rik	6	1	9	4	2	3	5	2	1	0	4	6
7420426K07Rik	0	0	0	0	0	0	0	0	0	0	0	0
7420461P10Rik	2	3	0	0	3	3	0	0	0	2	0	1
7530416G11Rik	1	0	0	0	1	0	0	0	1	2	1	1
7530428D23Rik	0	0	0	0	0	0	0	0	0	0	0	0
7630403G23Rik	0	0	0	0	0	0	0	0	0	0	0	0
8030411F24Rik	0	0	0	0	0	0	0	0	0	0	0	0
8030423F21Rik	0	0	0	0	1	0	0	0	0	0	0	0
8030423J24Rik	0	0	0	0	0	0	0	0	0	0	0	0
8030442B05Rik	1	0	0	0	0	0	1	0	0	2	0	3
8030443G20Rik	0	0	0	0	0	0	0	0	0	0	0	0
8030445P17Rik	0	0	0	0	0	0	0	0	0	0	0	0
8030451A03Rik	2	0	0	1	0	0	1	0	0	2	1	0
8030453O22Rik	39	48	34	28	46	99	53	17	61	23	43	33
8030462N17Rik	332	344	419	202	382	537	563	89	438	332	439	350
8030474K03Rik	0	0	5	0	1	0	1	0	1	0	2	0
8030487O14Rik	0	0	0	0	0	0	0	0	0	0	0	0
8430408G22Rik	67	44	67	113	27	21	23	14	92	44	64	157
8430419K02Rik	0	1	1	0	1	0	1	0	0	0	1	0
8430422M14Rik	12	3	6	2	11	9	5	5	10	8	5	10
8430423G03Rik	0	0	0	0	0	0	1	0	0	0	0	0
8430429K09Rik	23	26	28	7	22	39	40	12	25	15	33	34
8430432A02Rik	6	2	2	4	8	6	1	1	8	1	1	3
8430436N08Rik	0	0	0	0	0	0	0	0	0	0	0	0
8430437L04Rik	0	0	0	0	0	0	0	0	0	0	0	0
9030204H09Rik	0	3	1	0	1	0	2	0	0	0	1	3
9030407P20Rik	7	11	6	8	16	12	17	2	14	11	13	8
9030612E09Rik	0	0	0	0	0	0	0	0	0	0	0	0
9030616G12Rik	0	0	0	0	0	0	0	0	0	0	0	0
9030617O03Rik	1199	1147	1611	819	1758	1732	1756	397	1636	988	1543	1362
9030619P08Rik	0	0	0	0	0	0	0	0	0	0	0	0
9030622O22Rik	0	0	0	0	0	0	0	0	0	0	0	0
9030624G23Rik	0	0	0	0	1	0	0	0	0	0	0	1
9030624J02Rik	1726	1701	2205	1451	1620	2051	1839	411	2490	1373	2194	2162
9130008F23Rik	38	82	83	73	32	54	65	19	31	68	114	97
9130011E15Rik	436	411	483	260	543	724	618	137	523	308	481	388
9130015G15Rik	2	0	0	0	2	0	1	0	2	0	1	0
9130015L21Rik	0	0	0	0	0	0	0	0	0	0	0	0
9130017K11Rik	0	0	0	0	1	6	1	0	2	0	1	0
9130019O22Rik	48	60	42	38	40	24	37	9	62	34	56	57
9130019P16Rik	12	2	9	2	3	4	3	0	8	6	8	4
9130023H24Rik	68	44	65	21	107	112	111	22	95	31	45	40
9130024F11Rik	8	8	4	2	7	4	7	3	5	6	3	2
9130204K15Rik	0	0	0	0	0	3	1	0	0	0	0	0
9130204L05Rik	0	0	0	0	0	0	0	0	0	0	0	0
9130208D14Rik	42	18	20	8	17	19	10	3	34	16	16	21
9130213A22Rik	0	0	3	2	1	0	0	0	1	0	0	1
9130221F21Rik	2	0	0	0	0	0	0	0	1	0	0	0
9130221H12Rik	19	24	29	8	24	36	31	16	17	12	24	33
9130227L01Rik	7	5	0	0	29	18	13	5	7	0	0	3
9130230L23Rik	136	171	79	77	100	104	58	3	91	102	110	134
9130230N09Rik	143	129	84	63	107	95	62	19	97	74	109	136
9130401M01Rik	57	54	92	43	42	61	49	7	72	68	57	73
9130409I23Rik	0	0	0	0	0	0	1	0	0	0	0	0
9130409J20Rik	0	0	0	0	0	3	0	0	0	0	0	0
9130410C08Rik	0	0	0	0	0	0	0	0	0	0	0	0
9130604C24Rik	5	4	5	3	8	10	12	2	4	5	5	4
9230009I02Rik	0	0	0	0	0	0	0	0	0	0	0	0
9230019H11Rik	0	1	0	0	0	0	0	0	0	0	0	0
9230020A06Rik	0	0	0	0	0	0	0	0	0	0	0	0
9230102O04Rik	1	0	1	3	0	0	0	2	0	0	0	0
9230104L09Rik	0	0	0	0	0	0	0	0	0	0	0	0
9230104M06Rik	15	10	3	5	8	5	1	4	4	0	5	6
9230105E05Rik	0	0	2	0	1	0	0	1	1	2	2	2
9230106D20Rik	0	0	0	0	0	0	0	0	0	0	0	0
9230109A22Rik	0	1	0	0	0	0	0	0	0	0	0	0
9230110C19Rik	0	0	0	0	0	0	0	0	0	0	0	0
9230110F15Rik	0	0	0	0	0	0	0	0	0	0	0	0
9230111E07Rik	14	0	6	5	6	5	4	4	1	3	4	2
9230112D13Rik	0	0	0	0	0	0	0	0	0	1	0	0
9230112E08Rik	151	58	88	118	178	88	68	48	166	41	97	140
9230113P08Rik	0	0	0	0	0	0	0	0	0	0	0	0
9230114J08Rik	0	0	0	0	0	0	0	0	0	0	0	0
9230114K14Rik	29	15	42	13	16	25	32	0	19	18	41	20
9230116N13Rik	7	13	14	6	9	11	13	4	8	7	12	11
9230117E06Rik	0	1	2	2	0	0	0	0	0	1	0	1
9330020H09Rik	55	33	30	21	55	38	14	7	31	33	23	45
9330102E08Rik	3	1	0	2	7	7	4	3	5	2	3	5
9330104G04Rik	28	13	16	14	19	9	16	2	17	9	11	26
9330111N05Rik	5	1	3	0	9	4	1	0	6	0	2	2
9330118I20Rik	0	0	0	0	0	2	0	0	0	0	0	0
9330121J05Rik	0	0	0	0	0	0	0	0	0	0	0	0
9330132A10Rik	0	0	0	0	0	0	0	0	0	0	0	2
9330136K24Rik	20	12	10	7	10	22	26	5	17	8	21	12
9330151L19Rik	41	31	30	19	73	52	66	14	51	17	36	35
9330154J02Rik	0	2	0	0	0	0	0	0	0	0	0	1
9330154K18Rik	16	13	9	71	5	4	7	24	12	5	8	78
9330158H04Rik	0	0	0	0	0	0	0	0	0	0	0	0
9330159F19Rik	0	0	0	0	0	3	0	0	0	0	0	0
9330159M07Rik	46	40	76	62	46	36	45	14	61	33	86	60
9330160F10Rik	63	37	35	39	44	37	28	22	39	29	31	47
9330161L09Rik	16	23	12	17	18	11	9	7	22	5	20	29
9330162012Rik	0	1	0	0	0	0	4	0	0	1	0	0
9330162B11Rik	0	2	0	0	0	0	0	0	0	0	0	0
9330162G02Rik	948	1248	945	642	957	1055	917	235	837	738	1138	1082
9330171B17Rik	0	0	0	2	1	0	0	0	1	0	0	0
9330175E14Rik	39	44	26	30	20	9	12	8	20	19	30	109
9330175M20Rik	0	0	0	0	0	1	0	0	0	0	0	0
9330178D15Rik	0	0	0	0	0	0	0	0	0	0	0	0
9330179D12Rik	2	0	1	0	2	0	0	0	3	1	0	0
9330182L06Rik	33	33	12	10	74	111	118	22	31	28	22	25
9330182O14Rik	1	0	0	0	0	0	0	0	0	0	0	0
9330185C12Rik	0	0	0	0	0	0	0	0	0	0	0	0
9330198N18Rik	4	4	1	0	7	4	2	1	1	0	0	1
9430002A10Rik	5	0	4	0	4	3	4	0	4	3	2	3
9430007A20Rik	0	0	0	0	0	0	0	0	0	0	0	0
9430007M09Rik	0	0	0	0	0	0	0	0	0	0	0	0
9430015G10Rik	95	194	259	59	131	171	167	18	167	178	242	122
9430016H08Rik	130	192	174	101	150	222	208	34	151	163	199	183
9430018G01Rik	33	35	46	10	48	72	74	14	48	37	27	12
9430020K01Rik	45	76	66	34	79	229	183	33	114	39	78	63
9430021M05Rik	0	0	0	0	0	0	0	0	0	0	0	0
9430024E24Rik	1	0	0	0	0	0	0	0	1	0	0	1
9430025C20Rik	60	40	41	22	61	32	45	11	30	20	27	28
9430034N14Rik	380	298	271	171	290	255	225	43	309	190	331	374
9430037G07Rik	23	13	28	6	25	10	12	0	18	13	29	12
9430037O13Rik	1	18	5	2	2	10	11	0	8	7	19	3
9430038I01Rik	229	188	246	93	199	293	233	56	318	153	251	199
9430041J12Rik	0	0	0	0	1	0	0	0	0	0	0	0
9430053O09Rik	35	32	99	32	34	52	70	8	71	48	88	39
9430060I03Rik	16	2	4	5	6	3	1	2	6	4	6	8
9430062P05Rik	1	2	2	0	1	4	6	1	2	0	0	2
9430064I24Rik	6	5	5	1	7	2	1	2	1	2	2	13
9430065F17Rik	0	3	0	0	0	0	0	0	1	0	0	1
9430069I07Rik	0	0	0	3	0	0	0	0	2	0	0	0
9430073C21Rik	0	0	0	0	0	0	0	0	0	0	0	0
9430076C15Rik	2256	2609	2721	2811	1160	1025	918	498	2330	1682	2661	4010
9430083B18Rik	0	0	0	0	0	0	0	0	0	0	0	0
9430087B13Rik	0	0	0	0	0	0	0	0	0	0	0	0
9430087J23Rik	8	7	5	1	18	25	20	2	10	0	1	4
9430091E24Rik	65	64	61	31	93	99	96	16	88	41	69	48
9430092D12Rik	37	30	80	24	33	26	56	7	45	56	82	22
9430093N23Rik	0	0	0	0	0	0	0	0	0	0	0	0
9430097D07Rik	5	7	4	8	4	6	2	2	1	0	6	9
9430098F02Rik	0	1	0	0	0	0	0	0	0	0	0	0
9530002B09Rik	0	0	0	0	1	0	0	0	0	0	0	0
9530003J23Rik	0	0	1	0	0	0	0	0	1	0	0	0
9530003O04Rik	21	27	45	26	36	13	40	7	44	28	58	32
9530013L04Rik	0	1	0	0	0	0	0	0	0	0	0	1
9530018H14Rik	0	0	0	0	0	0	0	0	0	0	0	0
9530022L04Rik	6	6	5	1	5	7	7	1	9	5	8	5
9530026F06Rik	0	0	0	0	0	0	0	0	0	0	0	0
9530026P05Rik	0	0	0	0	0	0	0	0	0	0	0	0
9530027J09Rik	2	9	20	7	8	11	5	0	2	5	9	9
9530034A14Rik	1	0	0	0	0	0	0	0	0	0	0	0
9530034E10Rik	16	19	18	7	20	15	28	0	25	19	21	9
9530036M11Rik	1	2	13	0	2	0	0	0	6	4	3	1
9530036O11Rik	0	0	0	0	0	0	0	0	0	0	0	0
9530046B11Rik	21	18	9	11	31	40	11	2	15	7	10	14
9530051G07Rik	0	0	0	0	0	0	0	0	0	0	0	0
9530052C20Rik	1	2	5	6	7	6	2	3	5	3	5	6
9530052E02Rik	5	0	0	3	4	5	3	5	2	2	1	8
9530053A07Rik	4	7	7	0	1	1	2	0	2	4	4	4
9530056K15Rik	2	0	2	2	0	8	1	1	1	6	0	0
9530059O14Rik	10	1	1	0	4	1	2	0	7	0	0	2
9530062K07Rik	11	6	9	6	17	0	8	2	9	6	7	14
9530068E07Rik	2275	2028	2333	1358	1980	2795	2467	462	3002	1832	2290	2381
9530077C05Rik	32	17	17	5	37	15	25	4	15	20	19	8
9530078K11Rik	17	5	10	4	13	1	10	1	12	5	14	18
9530080O11Rik	1	1	0	0	0	0	1	0	0	0	1	2
9530082P21Rik	147	88	129	91	141	128	109	23	148	83	92	143
9530085L11Rik	43	22	48	13	62	21	43	15	48	20	51	38
9530085P06Rik	1	2	1	1	1	0	1	0	1	4	2	0
9530086O07Rik	0	1	0	0	0	0	1	0	0	0	0	0
9530097N15Rik	0	3	1	0	3	0	6	0	1	0	4	9
9630001P10Rik	0	1	0	0	0	0	0	0	1	0	1	0
9630010A21Rik	138	106	80	72	60	36	36	12	103	51	77	121
9630013D21Rik	14	10	14	7	47	37	32	7	16	8	10	15
9630013K17Rik	10	3	11	4	23	10	17	2	16	3	6	4
9630028B13Rik	6	5	2	5	3	4	1	2	4	9	5	4
9630028H03Rik	0	0	0	0	0	0	0	0	0	0	0	0
9630041A04Rik	0	0	0	0	0	0	0	0	0	0	0	0
9830004L10Rik	0	0	0	0	0	0	0	0	0	0	0	0
9830107B12Rik	2	0	0	0	0	0	0	0	0	0	0	0
[truncated: 46,666 more rows]
