# Supplementary material for: Dissecting the phenotypic and functional heterogeneity of mouse inflammatory osteoclasts by the expression of Cx3cr1
Source: eLife. 2020 May 13;9:e54493. doi: 10.7554/eLife.54493 (PMC7220377; doi:10.7554/eLife.54493)
Supplement: Source data 2. — Counts per gene and per sample after normalization and batch correction from the RNAseq analysis of Cx3cr1+ and Cx3cr1neg i-OCLs from WT Cx3cr1GFP/+ mice and Cx3cr1+ i-OCLs from deficient Cx3cr1GFP/GFP mice. In each group, the 4 i-OCL samples have been obtained from 4 different mice. [file elife-54493-data2.xlsx]

## Sheet: Counts_DeseqNormaBatchCorrected
Counts_DeseqNormaBatchCorrected
Gene	Cx3cr1+ OCLs from GFP/+ mice				Cx3cr1neg OCLs from GFP/+ mice				Cx3cr1+ OCLs from GFP/GFP mice
	Cx3cr1+	Cx3cr1+	Cx3cr1+	Cx3cr1+	Cx3cr1-	Cx3cr1-	Cx3cr1-	Cx3cr1-	Cx3cr1gfp/gfp	Cx3cr1gfp/gfp	Cx3cr1gfp/gfp	Cx3cr1gfp/gfp
0610007P14Rik	7.546216693	7.267807867	7.422038182	7.635186982	7.255245324	7.380768543	7.229860323	6.81771695	7.45024781	7.603133415	7.599811322	7.798805894
0610009B22Rik	7.281484924	7.29564242	7.348715164	7.215060685	7.533460102	7.709984609	7.652554882	7.647742594	7.443327189	7.252645186	7.257002169	7.395468937
0610009L18Rik	6.000705993	6.164494567	6.151092024	5.866001223	6.402593464	6.239708466	6.104204445	6.416330067	5.667730928	5.666827351	5.815733915	5.788699095
0610009O20Rik	8.209432938	8.186965538	8.099917812	8.116783604	8.592556759	8.679762376	8.791375691	8.879017009	8.227141462	8.162403245	8.137837656	8.033330545
0610010F05Rik	8.95276694	9.022854385	9.092279556	9.016096173	8.879554713	8.81275541	8.753352171	8.769731651	9.053419177	9.050131036	9.040109104	9.099913006
0610012G03Rik	9.396912763	9.32015501	9.360328752	9.367579613	9.694769507	10.29898046	10.12090965	9.750597	9.561786122	9.034332927	9.172229995	9.535291779
0610030E20Rik	8.315238186	8.314125809	8.081926206	8.198773189	8.241681468	8.237183954	8.26029427	7.981989428	7.900893633	7.906503524	8.115592812	8.27705067
0610037L13Rik	7.823386722	7.8707792	7.783848525	7.828540112	8.02756668	7.569841485	7.776292306	7.71844594	7.547908592	7.958241309	7.838721164	7.851875942
0610038B21Rik	7.263660659	7.384771272	7.063974609	7.334134687	7.667471779	7.484600467	7.44978285	7.155235784	6.99976757	7.061528268	7.417142548	7.441529536
1110002J07Rik	7.390351977	7.897163865	8.056073519	8.004735291	7.288943648	6.502451335	6.285776077	6.37117777	7.832142217	8.111822643	8.169588247	8.135524781
1110002L01Rik	6.16972703	6.358157327	5.993533969	5.972901927	6.313581442	6.296533511	6.323693861	6.372232369	6.153642785	5.98226042	6.319723428	6.291816962
1110004E09Rik	6.579844193	6.457660836	6.517699463	6.129201411	6.382785414	6.372656045	6.370683836	6.525386675	6.448557672	6.580870398	6.52280398	6.756599194
1110004F10Rik	9.438875289	9.289601941	9.405157205	9.349069794	9.299068772	9.420595251	9.546101822	9.26249819	9.680024029	9.707770897	9.466709063	9.806400105
1110008F13Rik	8.879377749	9.033177787	9.025461336	8.922400542	9.292082962	9.395455379	9.26258834	9.282389965	9.108300911	8.851128456	8.991711946	9.074971115
1110008L16Rik	7.202446363	7.578236266	7.375527939	7.157887434	7.718836328	7.536362163	7.56500436	7.757662914	7.431409823	7.238094085	7.412160214	7.437142165
1110008P14Rik	9.007284187	9.352798108	8.973385008	8.811092685	10.04734663	10.58725569	10.94848878	10.61716916	9.633833092	8.748410111	8.766590113	9.260202061
1110012L19Rik	6.655741741	6.402527219	6.352915638	6.446328269	6.55217589	6.963990488	6.605113541	6.512698325	6.439973645	6.281373569	6.689862097	6.688864683
1110019D14Rik	5.880002126	5.875270588	5.882776295	5.813620347	6.285698829	6.133923407	6.247020294	6.114067666	5.811569487	5.968076447	5.847473854	6.049582429
1110032A03Rik	7.430950661	7.247880492	7.255310646	7.451186886	7.559848611	7.227523264	7.424793071	7.201038847	6.834384814	7.34978033	7.145080368	7.172958353
1110034G24Rik	6.325277179	6.310286784	6.479351637	6.837458922	6.115953234	6.15597332	6.10755605	5.64864612	6.400815869	6.375786179	6.255138596	6.35594124
1110037F02Rik	10.1688818	10.16707056	10.25243063	10.33969804	10.13398486	10.03154655	9.932558894	9.98031686	10.18631832	10.29056786	10.30419545	10.16917008
1110038B12Rik	8.213515509	7.929722158	7.845421611	7.887822441	8.062431066	7.717626906	7.919198432	7.947176151	7.596074615	8.224672126	8.107401147	8.037022598
1110038F14Rik	7.442438796	7.255268554	7.332069782	7.291315022	7.2478738	7.134298035	7.28603445	7.126073841	7.120025087	7.420771095	7.192233452	7.39294882
1110046J04Rik	5.911720644	5.998893679	5.713334314	5.833706396	5.670465092	5.799571765	5.776084831	5.655432669	5.793709231	5.577429523	5.886475823	5.886755903
1110051M20Rik	7.405230804	7.629353983	7.386129474	7.589187992	7.525299396	7.135444886	7.27221657	7.219841468	7.204768775	7.370500105	7.476952931	7.326269515
1110059E24Rik	7.577733754	7.769578837	7.592325365	7.262927709	7.746871327	7.684153233	7.795907508	8.09809025	7.799696762	7.670569774	7.73606897	7.763283884
1110059G10Rik	7.401399558	6.839742691	6.88884744	6.880446543	6.66752215	6.899746845	7.159458991	6.696234928	6.798156534	7.127588707	6.818771811	7.290396771
1110065P20Rik	5.735191179	6.016297907	6.073964688	5.852837801	6.233246923	5.935447548	5.888387722	6.077588949	5.954129727	5.970822373	5.960215419	5.992141078
1190002N15Rik	8.943455797	8.874415911	8.888555979	8.927740185	7.958732077	7.742522814	7.761307385	7.757013167	8.518521041	8.803770189	8.770845551	8.735955563
1190007I07Rik	6.009217298	5.651740131	5.765663488	6.025035736	6.337445567	6.609058947	6.567786885	6.133193533	5.878944072	5.96480786	5.892156566	6.067377669
1500004A13Rik	6.283872567	6.355971579	6.451896505	6.294230701	6.652901525	6.449537827	6.504454866	6.14355817	6.237895993	6.369160679	6.218318714	6.736881215
1500011B03Rik	6.55678917	6.334630577	6.67141293	6.550531078	6.32982362	6.257239736	6.066234383	6.109036612	6.19511988	6.489862356	6.344085357	6.42216498
1500011K16Rik	7.424543015	7.034976219	7.54104123	7.208161211	7.012602313	7.392999189	7.240475309	7.17144818	7.591564423	7.600734342	7.247193211	7.64910036
1500015A07Rik	6.494456061	6.268863658	6.350501615	6.34263523	6.52971562	6.52608151	6.544959425	6.137182864	6.371280977	6.600507491	6.499991618	6.915634565
1600002H07Rik	7.5085414	7.53922133	7.518082316	7.410775884	7.594768506	7.488937988	7.239102053	7.478752359	7.38218528	7.457335869	7.728310818	7.595966943
1600002K03Rik	6.561577756	6.58362749	6.762891281	6.40573063	6.652146089	6.727663016	6.548787227	6.702709796	6.532609951	6.43504329	6.434655288	6.63789337
1600012H06Rik	8.579213803	8.454703215	8.432305087	8.510630137	8.780519548	9.08893657	9.089117923	8.876354257	8.622437676	8.438531243	8.460748017	8.595186633
1600014C10Rik	7.543281844	7.387969257	7.502339174	7.551835633	7.711751223	7.787567061	8.074966459	7.772763685	7.465751545	7.545248295	7.14347898	7.396185295
1600020E01Rik	7.192103669	7.182023923	7.142685059	7.188167965	7.423331961	7.014626611	6.831718213	6.94222334	6.680175999	7.098961095	7.321208358	7.165220324
1700001K19Rik	6.711769259	6.811979636	6.174159186	6.004193197	5.810551259	5.896339408	5.899223856	5.445313854	5.82046774	5.634469215	6.269405216	6.893281208
1700003N22Rik	6.572882626	6.550647699	6.724288599	7.032058504	6.470431991	6.741606265	6.497032386	6.224967452	6.925123174	6.676183827	6.747116806	6.711411834
1700008B11Rik	6.449171979	6.259892518	6.137842082	6.127209072	6.429530428	6.095082334	6.088945364	6.188714902	5.647022462	6.170750018	6.298937423	6.209800895
1700008J07Rik	6.200140597	6.265314799	5.981613936	6.119241234	6.225474417	6.112236126	6.110404225	6.332300274	5.986799433	6.034863521	6.320396285	5.960872938
1700010I14Rik	5.879463483	5.707668738	5.967851776	5.646122342	5.826174854	5.852871043	5.948833163	5.812938343	6.00587911	6.150977665	5.794832507	6.252456761
1700015E13Rik	5.502970882	5.286873885	5.672556221	5.093750605	6.090166074	6.610073403	6.085328407	6.733033711	5.592331433	5.2885211	5.427583761	5.358684072
1700017B05Rik	11.10723539	11.14130771	10.99885035	11.13643984	11.07406486	11.14680999	10.93532569	11.30615665	10.99142205	10.8846046	11.23854626	10.73012582
1700020I14Rik	10.68151584	10.67923425	10.61571181	10.46076507	10.86028511	11.2100771	11.27693619	11.11685963	10.7470542	10.3995438	10.39620715	10.71123045
1700021F05Rik	7.194361343	7.016084289	6.848565514	6.457821723	7.501376875	7.738145552	8.042200094	7.866885464	7.14456181	7.086070187	6.94953442	7.515592841
1700023H06Rik	6.823701104	6.519685157	6.83402646	6.358373714	7.287758216	6.690043226	7.052777913	7.341872865	6.608482067	7.510213004	6.833137014	7.019694808
1700025G04Rik	9.1934819	9.312382829	9.304180872	9.165265239	9.952230378	9.936431772	9.775951913	9.815781039	9.263495358	9.160393034	9.32907485	9.428161358
1700025N23Rik	6.223037814	5.863902936	6.472727435	6.134242151	5.592459214	5.428101877	5.112085312	5.084725133	6.006983683	6.530475899	6.237667964	6.603513428
1700029I15Rik	6.193968605	6.285539482	5.76006851	6.039607024	5.840455107	5.599178552	6.124312509	6.113581412	5.990085402	6.139791079	6.140128094	5.871320677
1700030K09Rik	6.515371293	6.335281814	6.379571227	6.425869377	6.365389666	6.22415328	6.242981645	6.413020997	6.235067895	6.556393759	6.493275982	6.27693848
1700034J05Rik	6.785855143	7.477404681	7.081254434	7.30923497	6.790670635	6.677971348	6.550303431	6.518834877	7.332520997	6.753670746	7.27748891	7.080976927
1700037C18Rik	6.002686481	5.971021328	6.030750896	5.661480008	5.888512467	5.739843277	5.926812915	6.196670967	5.951795964	6.132130307	5.885431101	5.984843937
1700037H04Rik	8.38389276	8.198475445	8.294229709	8.550968624	7.81666783	7.615406145	7.584796699	7.422809632	7.978588323	8.365267323	8.300122505	8.205370657
1700052K11Rik	5.690600692	5.72285487	5.667918983	5.623216043	5.866968314	5.474511297	5.737613157	5.889785366	5.779961242	6.14016408	5.931998108	5.824528838
1700056N10Rik	6.155553148	6.141623751	6.255119861	6.170781497	5.968900834	5.903195404	6.013849377	5.822653542	6.122656693	6.202291519	5.978141437	6.253675635
1700060J05Rik	5.521110743	5.751296421	5.731189963	5.79456668	6.35368679	5.820291547	6.280808996	5.087211474	5.804884356	6.108093922	5.66768293	6.797903736
1700066M21Rik	6.935555007	6.89461403	7.068131376	7.217557181	6.95236188	6.661920208	6.717106886	6.895502389	7.200450195	7.531832843	7.30312882	6.97530751
1700071M16Rik	7.591435424	7.333391745	7.690641446	7.202428619	6.661305391	6.185864984	6.412707889	7.026521109	6.987047658	7.720531744	7.136439139	7.010838746
1700088E04Rik	5.908784773	6.589841845	5.727217332	5.896464803	6.492290358	6.394612674	6.665729327	6.2310622	5.973410568	5.39003118	5.981539039	6.246958695
1700099I09Rik	5.860219615	5.697524478	5.733058536	5.543260266	5.61961133	5.526342823	5.7347744	6.039936487	5.682894828	5.938858471	5.694892836	5.579529019
1700101I11Rik	6.007573649	5.68273508	5.853189942	5.77380701	5.617716654	5.658847378	5.256666246	5.743575451	5.640361228	5.924069073	6.155795343	5.74826907
1700109H08Rik	7.877737809	8.273209465	7.871745657	8.234669162	8.058264646	7.557855948	7.746211239	7.480210129	7.76175113	7.866688172	8.079796689	7.982874294
1700112E06Rik	8.063790703	7.714622461	8.27577928	8.228300528	7.27262964	6.695500519	7.349878758	7.411494492	6.880510129	7.806807491	6.591272434	6.577135452
1700123O20Rik	7.858159727	7.72081459	8.028050233	7.913150622	8.237577795	8.410635859	8.294309865	8.273271682	8.186663512	8.150950586	7.960040936	8.09597873
1810011H11Rik	7.951549166	8.03773648	8.249818025	8.084189813	7.253277068	6.699313347	6.871000514	6.689417494	7.796034461	8.263810869	7.880042156	8.227253388
1810013L24Rik	10.85834183	10.97624431	10.71454241	10.848325	11.11398579	11.11951917	11.27290497	10.96468323	11.02144707	10.89801121	11.00632731	11.18076646
1810014B01Rik	5.869940566	5.81196648	5.944914485	6.041155217	6.121431196	5.925398958	5.971762974	5.911814353	5.842792655	6.096798979	5.917486958	5.881194847
1810022K09Rik	7.067909394	6.875743714	6.491352214	6.958628228	6.981004982	6.748560234	7.079186315	6.575446478	6.34523079	6.769841218	6.823606637	6.86007046
1810026B05Rik	9.713649994	9.695192197	9.386837751	9.410563466	9.631867264	9.171926281	9.25330432	9.385593072	9.034119507	9.512518288	9.739494694	9.583480228
1810026J23Rik	9.24328298	9.218494655	9.19276953	9.198568316	9.43941352	9.727947809	9.592873579	9.573754141	9.366720668	9.102974704	9.26377406	9.277094712
1810030O07Rik	8.947535043	8.982604192	9.078011859	8.857175289	8.805298332	8.78173212	8.76182692	8.992530643	9.097933279	9.086430342	9.010927876	9.001060723
1810032O08Rik	5.939650069	6.196773373	6.335914531	6.426842023	6.049301751	5.787817902	5.521050794	5.640192854	6.265681771	6.270042315	6.397668265	6.187598714
1810034E14Rik	6.440394006	6.647931909	5.94859891	6.129056744	6.417449066	6.560997711	6.863672281	6.736589198	6.412825951	6.061739402	6.458397833	6.405023081
1810037I17Rik	8.23237179	8.027752971	8.261246278	7.848870589	8.086098494	8.444452473	8.418229113	8.250981295	8.18615429	8.032419129	7.825149183	8.404772689
1810043G02Rik	7.798566147	7.619628644	7.727661365	7.648242213	6.948098618	6.728502733	6.803906462	6.887522568	7.169878625	7.568412014	7.384975564	7.380778609
1810043H04Rik	6.746725532	6.693513523	6.687138845	6.575052329	6.64118922	6.636489811	6.76526315	6.734343903	6.76711128	6.825022698	6.702624038	6.845629801
1810055G02Rik	6.859716828	6.931330508	6.885250133	7.283391729	6.655005302	6.881818903	6.611035406	6.36966621	6.907495419	6.609068136	6.925932008	6.769159609
1810058I24Rik	9.488382886	9.269439682	9.160113827	9.324488356	9.643615637	9.820204443	10.06597653	9.724407179	9.313020547	9.355374946	9.218928717	9.396123536
2010107E04Rik	8.896276929	8.823945148	8.81858714	8.595158171	9.328251526	9.525060366	9.72748921	9.493651166	9.017740996	8.893263937	8.696193101	9.153460114
2010111I01Rik	10.25881367	10.44278402	10.24030134	10.24082613	9.850524792	10.08957729	9.986421585	9.722359091	10.30037722	9.877354377	10.18299277	10.44653046
2010315B03Rik	8.619601595	8.350613528	8.406180688	8.186655499	8.817456114	8.792565058	8.793008364	9.07487415	8.360121625	8.654000748	8.597990283	8.535649686
2010320M18Rik	6.351631347	6.396029821	6.428209905	6.308355154	6.811886235	6.994711644	6.944181859	6.54722531	6.371029355	6.143805472	6.162155173	6.678966473
2210008F06Rik	5.727810668	6.475744261	5.735355469	5.324644471	6.97600042	7.089237546	7.433650788	7.601099221	6.381490884	5.520320165	5.916295716	6.159558281
2210013O21Rik	7.00370911	7.010631403	6.914557977	6.861067299	7.029154163	6.803037928	6.878735481	6.722329047	6.606595908	6.82578985	6.846165723	7.056062836
2210016F16Rik	8.959687691	9.06791456	9.177058262	9.156937544	9.18548171	9.151378796	9.158367982	9.323352565	9.337938825	9.263814869	9.147681981	9.002818118
2210016L21Rik	8.063599023	8.030839305	8.114248682	8.405943629	8.004811477	8.023286526	8.000689595	7.637050931	8.04227057	8.056555239	7.995742793	8.06768651
2210406H18Rik	6.997676448	6.851821048	6.994856602	7.402983914	6.549510137	6.532706966	6.34218558	5.881718404	6.76209233	6.924750901	6.972236733	7.024576598
2210408F21Rik	6.660739239	6.503576781	6.640497292	6.187338555	6.39948935	6.177063375	6.486940683	6.422057184	6.189716398	6.569304832	6.122507013	6.640549248
2210408I21Rik	6.716920794	6.485390649	6.5799891	6.462626168	6.458342431	6.275347247	6.463985658	6.157825533	6.366311895	6.780837224	6.497600361	6.921123418
2300009A05Rik	6.913582887	6.822397421	6.23801305	6.788424921	7.080604442	7.102013238	7.268817164	6.646361886	6.371585346	6.441362017	6.858942461	6.930985868
2310001H17Rik	7.836324902	7.508511852	7.394952945	7.628062454	7.527320926	7.335071262	7.411145938	7.256597036	7.103613883	7.623676598	7.661160829	7.582600222
2310009B15Rik	6.205431599	5.796655789	6.199821064	6.12167895	5.851918101	6.022094783	6.187337262	6.070157069	6.308247202	6.54684633	5.978438576	6.173760883
2310011J03Rik	8.49826415	8.369605542	8.481146678	8.742761452	8.53972895	8.698947409	8.559041988	8.326882827	8.605824759	8.575264907	8.603629192	8.57417358
2310015A10Rik	6.871836835	6.748902247	6.911318263	6.734787432	6.887885976	6.225400692	6.202845939	6.59604918	6.285558154	7.070978026	6.931116763	6.714444352
2310022A10Rik	9.919677803	9.921511751	10.0811815	10.16798487	9.780174598	9.624729333	9.568483846	9.634714716	10.08004474	10.23365606	10.1302318	9.977197556
2310022B05Rik	7.786279945	7.537132096	7.68462371	7.704028102	7.439241942	7.636620181	7.560108995	7.501435024	7.58787945	7.639649061	7.568668632	7.607938212
2310033P09Rik	7.168011067	7.107646004	7.083287288	7.000372997	7.243290655	7.250731347	7.036788167	7.347516767	6.841470822	6.894395194	7.13269709	6.90488278
2310035C23Rik	9.999165098	9.93378733	9.988036171	10.01185465	10.03089898	9.984307265	10.05879925	10.17047063	9.935350308	10.04731979	9.918578972	9.783089112
2310036O22Rik	9.711758504	9.635248642	9.8330226	9.873689644	9.481708345	9.49464519	9.376726582	9.436748024	9.795652261	9.859225279	9.779369928	9.678681442
2310039H08Rik	6.226654053	6.123507437	6.275560604	5.998878493	6.751028953	6.984114699	6.995610719	6.995990542	6.604228731	6.474289601	6.310740414	6.587042701
2310043M15Rik	6.024099771	5.682878948	6.002447213	5.733278852	6.127318767	5.889375237	5.620051457	6.114092216	5.503684152	6.082848505	6.032604021	5.807731622
2310043P16Rik	6.933839537	6.623563264	6.530358705	6.585038613	6.554910029	6.123475996	6.181552585	6.218147808	5.948265234	6.68997554	6.72510351	6.633828379
2310057M21Rik	8.364661181	8.484357914	8.331336656	8.390844417	8.679274094	8.65595028	8.74182683	8.742514118	8.544791122	8.448418204	8.515562911	8.455367862
2310058D17Rik	6.800669137	6.787277556	6.532135878	6.585145289	7.135683733	6.659635789	6.673325268	7.006969569	6.261332497	6.750772023	6.992224222	6.605570511
2310061I04Rik	7.370341726	7.428110572	6.888987911	7.103039177	7.489363098	7.842322277	8.165069953	7.869213147	7.014113093	6.603385068	6.819760053	6.901565593
2410002F23Rik	8.034200187	7.958503173	7.977790827	8.183618283	8.113251855	7.622063668	7.82193193	7.910542303	7.807673649	8.374558851	8.155402934	7.860965105
2410004B18Rik	7.732110572	7.520729041	7.293886494	7.651563153	7.47082977	7.735034889	7.556090465	7.184052193	7.392794291	7.339970702	7.745757674	7.760119287
2410006H16Rik	8.444714674	8.019903934	8.135514305	8.178510082	8.296838745	7.974170694	7.923521771	8.349266559	7.624390278	8.37186907	8.306907622	7.838167056
2410015M20Rik	8.622154742	8.696385614	8.670566819	8.553479925	9.285466999	9.462976716	9.644045912	9.373093886	8.959186043	8.707445455	8.552195054	8.940233974
2410016O06Rik	7.151318197	7.355578731	7.368078538	7.492206123	7.639475294	7.457952632	7.550460779	7.613126819	7.644574716	7.621836844	7.51682889	7.330035266
2410022M11Rik	6.458696559	6.715876626	6.712813714	6.313920483	6.833948175	6.931173784	6.408370386	6.909740843	6.268333493	5.913927818	6.439794127	6.337316902
2410089E03Rik	9.012231983	8.941779284	8.934009898	8.761314863	8.534122021	8.524710336	8.365268192	8.739040573	8.652489307	8.732353692	8.899565221	8.698487876
2410131K14Rik	9.087236715	9.253831037	9.206001689	9.224646843	9.992224477	10.2089763	10.13125188	10.20234639	9.52433467	9.140988526	9.266542291	9.176802627
2500002B13Rik	6.491380603	6.655219744	6.175863233	6.724604517	7.373349552	7.077892033	7.622057415	7.00120702	6.347172756	6.478791134	6.413982263	6.486091375
2510002D24Rik	6.206767372	6.019656181	6.135461773	6.224358419	6.687886604	6.646236122	6.765626577	6.582101375	6.085675408	6.314437081	6.079241034	6.17386959
2510009E07Rik	9.030469919	9.005331178	8.966108039	9.105786653	8.507344462	8.336756351	8.548614629	8.43376896	8.865337805	9.061064658	8.888429518	8.863596572
2510016D11Rik	7.168150801	7.219059483	7.339995696	7.178191687	7.423677699	7.108041668	7.142986687	7.586330607	7.118543053	7.383270401	7.227389169	6.945849259
2510039O18Rik	10.61611073	10.53755571	10.68717859	10.74778711	10.59462752	10.82229779	10.57206818	10.60471302	10.72434083	10.57522558	10.67583231	10.58257896
2610001J05Rik	9.158951769	9.198175578	9.234039209	9.285443545	9.130188157	8.956784835	9.19763603	8.985901607	9.34381696	9.477996473	9.201281646	9.361611733
2610002M06Rik	8.152326511	8.154242011	8.224552267	8.53300201	8.231502002	8.260849018	8.220610291	7.887840611	8.34605295	8.314790434	8.284718906	8.309038842
2610005L07Rik	6.462761606	6.676704254	6.397219043	6.223326109	6.647892926	6.375635921	6.148274343	6.590653585	6.017292204	6.075606562	6.58245335	6.313967043
2610008E11Rik	7.018646353	7.052376324	7.024427688	7.036468325	7.042704359	7.047723738	6.879081705	7.146794559	7.00454955	6.965800199	7.162390869	6.882637379
2610012C04Rik	5.638313994	5.693141213	5.673870085	5.282548421	5.773005189	5.615678654	5.636994437	5.938807304	5.800981713	5.903481029	5.901436374	5.99094517
2610020C07Rik	7.163974516	7.333193253	7.059145521	7.165900623	6.738747966	6.453113529	6.624483625	6.542662199	6.831571011	6.947986712	7.050664348	7.025730672
2610020H08Rik	7.047198742	7.206912313	7.229473548	6.916907545	6.733005827	6.335723707	6.515276715	6.998271504	7.009168253	7.246736801	7.044622558	6.874193772
2610021A01Rik	7.311500786	7.157425476	7.157331862	7.169647483	7.356644155	7.102781393	7.291610484	7.421162321	7.12523975	7.533177822	7.344442345	7.202574887
2610024D14Rik	6.979497741	7.242950035	7.240230809	7.514696732	6.809663155	6.24629438	6.258608939	5.877474471	6.964552654	7.264469134	7.254873801	7.361542347
2610037D02Rik	6.924405915	6.998479523	6.936809686	6.959938282	7.123299739	6.481949279	6.544692186	6.620406372	6.529737541	7.097014393	7.095941322	6.997098541
2610044O15Rik8	6.66470738	6.476737992	6.665363462	6.575617938	6.583108193	6.448657722	6.67836781	6.6580652	6.550073034	6.872492894	6.454157335	6.564205469
2610301B20Rik	6.923448363	6.902355055	6.888815192	6.912159685	6.93913484	7.067863479	7.067730413	6.787051803	7.041479233	6.933843902	6.94751683	7.204850948
2610306O10Rik	6.419773429	6.458518437	5.939407188	6.846165273	6.368356538	5.932582964	6.684720157	5.413702485	5.921330231	6.318358796	6.085332852	6.449592439
2610318N02Rik	6.104389014	6.017210994	6.264533574	6.324759968	5.592777781	5.406617233	5.046768673	5.480768857	5.876853719	6.150192286	6.262718267	5.768491689
2610507B11Rik	13.12495486	13.24725167	13.24095115	13.32451032	13.19058879	13.35007109	13.32635307	13.22288689	13.29577364	13.01399452	13.04401306	13.06392007
2610507I01Rik	6.639099883	6.445013922	6.495224702	6.654182487	6.941566105	7.024894309	7.20691614	6.592560953	6.274712099	6.385469856	6.153237244	6.608634647
2610524H06Rik	5.654527443	5.944282744	5.905706166	5.613367605	5.689092226	5.245599737	5.376953128	5.918460734	5.982363025	6.136100212	6.043323399	5.794154354
2700038G22Rik	6.325179249	6.50896436	6.318422405	6.376577968	6.512294285	6.034042124	6.031124021	6.606520165	6.179720822	6.474187873	6.66764793	6.034096224
2700049A03Rik	7.693313816	7.861704895	7.731846989	7.558054674	7.976453701	7.816616214	7.689005302	8.123736889	8.016351551	8.007797958	8.265266776	8.004327504
2700060E02Rik	9.112646439	8.729949548	8.700864314	8.808117013	8.746983856	8.823147132	9.030821761	8.768755197	8.768004781	9.074538396	8.895949001	9.050762865
2700062C07Rik	6.399310924	6.396705032	6.622246327	6.438942974	6.884246843	6.806316356	6.701400625	6.823122859	6.65111367	6.731650049	6.611024486	6.672605604
2700081O15Rik	6.792372885	6.446125031	6.691999518	6.646947229	6.41988272	6.415703196	6.173836611	6.543411988	6.513435514	6.863862891	6.85985499	6.535331902
2700094K13Rik	7.646340157	7.903608015	8.110451068	7.634073442	7.644135765	7.179585667	7.090026906	7.648327598	8.095703336	8.302985576	8.185701284	8.103778219
2700097O09Rik	6.460827626	6.113382933	6.485531716	6.069622557	6.435891455	6.139410111	6.216496076	6.489961228	5.886050298	6.529976335	6.080741587	6.223185595
2700099C18Rik	5.931675158	5.98261897	6.233583333	5.569666545	6.292891281	5.728078706	5.668527881	6.635220713	6.113561279	6.627430043	6.436016505	6.133240461
2810002D19Rik	6.219908227	5.993325912	6.253022942	6.216676913	6.167489023	6.254034723	6.238008366	5.947707561	6.226975251	6.367011865	6.123341192	6.449988026
2810004N23Rik	7.960987379	7.905611003	7.92519291	7.827524869	8.043285505	8.136780452	8.060351103	8.191149727	7.900680676	7.862562105	7.919409547	7.886278963
2810006K23Rik	6.830846545	6.674416898	6.75009005	7.095039068	7.132078559	7.217587885	7.161014324	6.827398609	6.849227414	6.920147735	6.901048145	6.889714841
2810013P06Rik	8.013093742	7.787062962	8.036445905	7.556824199	7.893059317	7.413119935	7.648875726	7.806322133	7.310318122	8.016288283	7.531149549	7.853324848
2810021J22Rik	6.249957571	6.452256058	6.390446061	6.483383611	6.606362144	6.411573868	6.555414648	6.587507907	6.647466585	6.639956373	6.55792559	6.432894782
2810025M15Rik	7.452831529	7.997087008	7.344659975	6.969037693	8.895114556	9.198539519	9.583997749	9.539145513	8.141064978	7.293384537	7.560353338	7.980827857
2810402E24Rik	6.257743587	6.055900509	6.253081796	6.202827014	6.384401993	6.352662417	6.405415157	6.024553288	6.182438309	6.416020963	6.166086937	6.597203588
2810403A07Rik	9.576473996	9.646119613	9.444214478	9.423409836	9.611768684	9.551666985	9.626196122	9.559148876	9.115363206	9.105819287	9.233195286	9.321047174
2810403D21Rik	5.889232266	5.71661804	5.69871262	5.695196369	5.845992577	5.443581002	5.679329392	5.636578973	5.492575162	6.067600962	5.849757992	5.896024663
2810405F17Rik	6.147330146	6.031163794	5.724086953	5.898220449	5.822201524	5.723481639	5.591913995	5.624498436	5.596660664	5.811546901	6.250191386	6.043473449
2810417H13Rik	8.266023579	8.541036096	8.733643376	8.745766043	8.083774422	7.303857928	7.511862556	7.531941974	8.988178597	9.493082574	9.092470666	9.060268581
2810428I15Rik	8.14579087	7.938442216	8.041237455	8.269691555	7.978804501	7.996797241	8.032135827	7.804641609	8.043980185	8.233336098	8.095202273	8.094242392
2810455O05Rik	5.875780137	5.875407551	6.08213167	5.608202132	5.615442278	5.476990681	5.29273296	5.74829765	5.878779025	6.017603208	5.99513681	6.013501658
2810474O19Rik	11.91733266	12.25359113	11.92494973	12.12219535	11.96786921	11.70798828	11.99941813	11.38860783	12.04870531	11.97232777	12.00953932	12.423104
2900026A02Rik	6.889503175	6.837478193	6.648931033	6.995120439	6.386273727	6.620044372	6.448571355	6.673065647	6.742041674	6.56029601	6.920316188	6.34963249
2900076A07Rik	5.739413992	5.698213353	5.505999164	5.950609854	5.743270794	5.953937223	6.054641723	5.322505686	5.742021	5.57255521	5.664064898	5.951590246
2900089D17Rik	7.264353767	7.08217035	7.027729293	6.882482407	6.394595643	6.270610363	6.016747976	6.507917954	6.569597423	6.875766119	7.184069564	6.838146471
2900093K20Rik	5.70812843	5.739915132	5.948264949	5.751917546	6.123469817	5.653590078	5.630635154	5.553510508	5.625635176	6.063728212	5.87833332	6.151805369
2900097C17Rik	9.480040112	9.57969042	9.439490833	9.556804455	9.292698543	9.47292203	9.382249738	9.210479502	9.600339661	9.320465867	9.551337745	9.605794359
3010003L21Rik	5.605515043	5.966477643	5.876857403	5.445899221	6.167861989	5.982511654	5.958472141	6.299190451	5.740992549	5.565380285	5.679040038	5.76927991
3010026O09Rik	7.475071336	7.21346055	7.645632754	7.018581643	6.932860346	6.975762942	6.43232474	6.869986459	6.89599086	7.11469905	7.225965047	7.415354439
3110001I22Rik	6.915816748	6.817327938	6.648186431	6.838577062	6.868424739	6.897515188	6.902363818	6.822878628	6.745411122	6.814809483	6.97910236	6.868196919
3110002H16Rik	9.726841816	9.773972126	9.577686346	9.587495336	9.558602373	9.693056841	9.731855984	9.665195596	9.488737431	9.307152653	9.46463929	9.521490689
3110040N11Rik	6.621690807	6.731791045	6.784353598	6.485243828	6.733136299	6.94624566	6.807257433	6.877249653	6.808181346	6.484971748	6.571397421	6.800514971
3110043O21Rik	10.41763716	10.4849406	10.31297714	10.56798131	11.00311741	11.18894461	11.33925285	10.92835032	10.73223071	10.47910008	10.50075529	10.65665365
3110056K07Rik	6.541466888	6.617116577	6.278942185	6.524222586	6.514242756	6.545685998	6.512773324	6.455772228	6.199702258	6.092609328	6.463696393	6.275417087
3110062M04Rik	7.388411334	7.543751232	7.570358199	7.398344654	7.996159819	8.013930335	8.143744886	7.990495554	7.685506009	7.512395595	7.355974077	7.681236954
3110082I17Rik	7.755509672	7.604772341	7.892172519	7.809962745	7.845710684	7.62799003	7.746598941	7.840405752	7.823446569	8.191904555	7.785895466	7.774298429
3830406C13Rik	8.248736855	8.339218062	8.113388152	7.925697203	8.441212433	8.341066748	8.652166087	8.533432101	8.288011701	8.297676179	8.21240675	8.518831685
4632404H12Rik	6.94896783	6.879757971	6.75685435	6.854759759	7.101298597	6.75758078	6.822417514	6.813374593	6.563576582	6.976504257	7.034571145	6.945708657
4632415L05Rik	7.03071127	6.805080013	7.03701765	7.006090911	7.317732305	7.127832988	7.039567974	7.029434438	7.054226345	7.469756919	7.326084297	7.367144572
4632427E13Rik	8.525863067	8.570321151	8.365833078	8.360775479	8.553330967	7.91723916	8.251849143	8.487984288	8.264865957	8.856499681	8.72637777	8.495300224
4732440D04Rik	6.682435956	6.616007813	6.545163293	6.785422718	6.998129504	6.704586895	6.726793171	6.395072411	6.221053472	6.581024224	6.629662468	6.721123803
4732487G21Rik	6.810291993	6.557675485	6.607821084	7.018516831	6.606989047	6.837669119	6.824797773	6.165013408	6.544461281	6.566397717	6.529123463	6.778212082
4833418N02Rik	7.389670781	7.330383208	7.23532771	7.097387974	7.535739538	7.040428348	7.091969547	7.679927685	6.632343997	7.18694276	7.230457059	6.780438656
4833420G17Rik	9.388006751	8.653587748	8.773372299	8.853641169	9.225012375	8.836683472	8.553020249	8.978450202	9.016522505	10.13927041	10.30314908	9.79745026
4833421G17Rik	5.681782427	6.248606146	5.767660769	5.523231269	5.811314147	5.72125503	5.870039657	6.048886715	6.004183232	5.52741863	5.85957938	5.925161822
4833439L19Rik	9.476144389	9.519719094	9.414253104	9.447155142	9.520633489	9.429066123	9.53254771	9.571415998	9.47050295	9.51849561	9.520480014	9.448709687
4833445I07Rik	7.049983433	7.158002545	7.100875965	7.219004443	6.568423861	6.126099758	6.096783482	6.374152474	6.77288835	7.107193341	7.193636197	6.798138727
4921511C10Rik	5.963814928	5.876685964	5.587491549	6.124285992	6.11697991	6.090164153	6.340944117	5.885944033	5.907294182	6.021238903	6.059653355	5.977858995
4921524J17Rik	6.717937358	6.801235753	6.649075305	6.42601846	6.946880842	6.705504223	6.936930384	6.947182305	6.75944524	6.917523464	6.838257751	7.051062675
4921531C22Rik	7.439088513	7.157154411	7.212074646	6.992443071	7.421010054	7.269066978	7.076455198	6.749977155	6.323240972	6.757118149	6.894809695	7.440919311
4930402H24Rik	9.568735251	9.44427037	9.529966356	9.691368322	9.117331965	9.170916477	9.255329209	8.848897816	9.37134448	9.44222485	9.272116132	9.517145558
4930404N11Rik	7.240175553	7.504755824	7.19442846	6.888790127	7.582158358	7.337196368	7.212199111	7.450177373	6.748895222	6.72927694	7.164601562	7.232261633
4930405O22Rik	6.333654466	6.607668379	6.58797201	6.681041304	6.402953366	6.570963372	6.439105292	6.523441275	6.607173971	6.165150053	6.316704502	6.139299224
4930412M03Rik	6.597875512	6.709353324	6.39844798	6.294469703	6.423398945	6.711841641	6.478168799	6.659232313	6.335132929	5.935212422	6.479790608	6.402705371
4930413G21Rik	5.9344495	5.71970074	5.870152423	5.807484664	6.007308238	6.116998148	5.753987707	5.796645799	5.75116366	5.856222509	6.068781267	6.088790934
4930427A07Rik	6.711876601	6.978003314	7.26887497	7.146892849	6.606149746	6.092947662	5.889961204	6.140302837	7.421112651	7.668188021	7.580302823	7.451943311
4930430E12Rik	8.459182349	8.375074679	8.428051905	8.612691674	8.182350074	8.507703097	8.461598832	7.755209785	8.569849042	8.32860369	8.321730729	8.843480007
4930430F08Rik	6.56035074	6.432905211	6.536907792	6.644903973	6.984034171	6.80638542	6.882574722	6.765688362	6.484745549	6.789839829	6.609647947	6.618538125
4930444A19Rik	5.995151857	5.814081376	6.030096848	6.311169944	5.229716933	5.541044338	5.153642864	5.023391073	5.847718771	5.717461847	5.888847849	5.738026543
4930453N24Rik	8.545531537	8.593360857	8.406405297	8.691693817	8.613053002	8.219541629	8.522220028	8.017272559	8.469683874	8.815365927	8.699643089	8.919302037
4930469K13Rik	6.237743506	6.032622627	6.20361537	6.251829829	6.14319984	6.319179422	6.166739722	5.941101904	6.124191165	6.153332462	6.13477942	6.312202779
4930503L19Rik	8.315881125	7.963465115	8.209821019	7.851152453	7.658441769	7.391785274	7.465019903	7.773205343	7.885796625	8.50486913	8.185278597	8.235761724
4930513N10Rik	6.086337816	6.127995639	6.000104098	6.36479463	5.966400536	6.057275825	5.96494093	5.679744297	5.906908231	5.774375119	5.994601555	5.915107656
4930513N20Rik	5.472886861	5.776691591	5.623755348	5.766966159	6.020955352	5.73794024	6.069744686	5.690705284	5.819653867	5.798864249	5.619996046	5.855824637
4930517G19Rik	7.288723019	7.780551629	7.388584922	6.994004216	7.049195841	6.73017382	6.664496322	7.001540832	7.165097753	6.992291163	7.449935369	7.507471564
4930523C07Rik	8.465701463	9.162031133	8.613972818	8.803515626	9.636741703	9.531725001	9.961557479	9.3778535	9.197054516	8.605741549	8.723967386	9.118128557
4930533B01Rik	6.199214563	6.287687558	6.200704942	6.475719708	6.302867802	6.444622293	6.729897316	6.48543224	6.479056134	6.248828647	6.050536241	6.01998655
4930551O13Rik	5.980082123	6.514890515	6.53302227	6.043914043	5.822046852	5.787453717	5.621859064	5.95126576	6.408260524	5.908045266	6.055508165	6.215209696
4930556M19Rik	6.110501791	6.24368428	5.730115401	5.87733845	6.88024259	6.9461284	7.357243763	6.979140489	5.98479592	5.78572762	5.888181136	6.119061361
4930565N06Rik	7.147125823	7.126947434	6.979393495	7.296699005	7.34294908	7.385977747	7.621137653	7.203193226	7.000834778	6.977984501	6.890378534	6.99101745
4930577N17Rik	6.890416122	6.923208829	6.997895419	7.000398967	6.616081867	6.69246155	6.572008749	6.569176991	7.008683026	6.899510636	6.945276847	6.945605057
4930579G18Rik	6.739404903	6.851019964	6.742408388	6.850530286	6.70835115	6.537714575	6.6025263	6.429643671	6.614203371	6.673224885	6.717024736	6.781785468
4930579G24Rik	6.17993744	6.145043528	6.428108821	6.253870529	6.226821155	5.771789393	5.894373394	6.11292729	6.599118455	7.089044129	6.683394835	6.63907923
4930589L23Rik	6.336065781	5.867921553	5.982849522	5.877260169	5.870131276	5.708672943	5.476755197	5.532407115	5.47725022	6.10685278	6.223842558	6.273779992
4930594C11Rik	5.779366119	6.21948954	5.774335266	6.165732724	5.691164236	5.949053137	5.817300093	5.839559763	6.065604594	5.367592271	5.944499589	5.530842462
4930595D18Rik	7.325734494	7.657920003	7.451413613	7.318863501	7.033339389	6.734668691	6.81694141	7.011912574	7.18217876	7.148663949	7.27289762	7.210476568
4930596I21Rik	6.286816161	6.748542873	6.532635025	6.548777594	5.999134064	6.011175169	5.97314153	6.470739068	6.884896499	6.411128681	6.665070168	6.151330061
4930599N24Rik	5.968131352	5.985418424	5.945299729	5.765207339	5.949893257	6.032866888	5.882552824	6.030933536	6.062701383	5.96244068	6.152873439	6.184585117
4931406C07Rik	8.81999891	8.626972978	8.611629404	8.604444049	8.836602286	8.874380114	8.96226649	8.842308998	8.542887271	8.698135375	8.625592573	8.75273542
4931406P16Rik	9.00602248	8.901941723	8.836650696	8.790972922	8.911100962	9.160258975	9.01518227	9.052472961	8.853822211	8.708744954	8.919112686	8.92749977
4931413K12Rik	7.215371856	7.287260988	6.727164455	6.635884616	7.001722551	6.591071454	6.920458708	7.203705922	6.370695969	6.709457934	6.940167213	6.748199837
4931414P19Rik	6.257614448	6.220951824	6.28993783	6.510622302	6.416040318	6.53820674	6.454906417	6.484293833	6.267596712	6.182092913	6.196407231	5.946335343
4931422A03Rik	6.488479836	6.651384848	6.310797237	6.452818062	6.134053265	5.698824337	5.851714564	5.85451881	6.013257025	6.285580942	6.473278326	6.328453253
4931428F04Rik	6.096064133	6.285529514	6.075079118	6.186708234	6.321015082	6.257449245	6.360354803	6.529796171	6.092635693	5.966736148	6.074280987	5.793210503
4931440P22Rik	8.223374188	7.960912468	8.097389738	7.848274359	7.968198149	7.835924413	7.663256236	7.619997203	7.562795908	7.957531365	7.993722272	8.286096684
4932438A13Rik	11.52194234	11.64118949	11.55680883	11.48506033	11.45880257	11.339283	11.36780474	11.5014051	11.45523668	11.45550911	11.51136802	11.44951617
4932441J04Rik	6.310295385	6.596519827	6.429706646	6.19470508	6.97726222	6.595786587	6.808021566	6.828905226	6.227398836	6.322650027	6.27722823	6.491346135
4932442E05Rik	7.10032583	7.106649748	7.002653302	7.296565131	7.386780549	6.923577409	6.982026464	6.958390113	6.862467868	7.31934709	7.364894482	7.094619003
4933400F21Rik	7.368255068	7.466526526	7.350254013	7.159275576	7.953613913	8.230435359	8.470647917	8.34188498	7.776693466	7.401600561	7.277660516	7.59740189
4933406P04Rik	5.90981135	5.877898075	5.561269285	5.389129809	5.712955969	5.650120826	5.809884715	5.716177874	5.558759682	5.6535081	5.810373001	6.076219318
4933421O10Rik	7.239681805	7.125300039	6.904181472	6.931598908	7.131005308	6.493655061	6.663661216	6.821306143	6.17514344	6.926875452	6.977987863	6.792925501
4933423P22Rik	9.110414237	9.462789271	9.425546385	9.31554249	9.31266885	9.050190846	9.497132998	9.065249323	9.261086502	9.171189472	8.761490206	9.303377776
4933427D14Rik	7.636255994	7.179716591	7.289351178	7.191704576	7.203243416	7.236202893	7.257522452	7.254812123	7.106059093	7.529639019	7.398684873	7.499041804
4933433G15Rik	6.435054659	6.460487753	6.263662981	6.489823051	6.453148358	6.058811607	6.141706455	5.900971428	5.850794139	6.219697796	6.33362772	6.348202677
4933434E20Rik	9.110535934	9.06051343	8.945970522	8.939251355	9.102711165	9.129223458	9.259347907	9.247765988	9.18792785	9.211438061	9.19585652	9.214157606
4933439C10Rik	7.214004357	7.162482796	7.021175774	7.172246714	7.497377397	7.250815582	7.227602926	7.421744647	6.669299494	6.96738287	7.131902548	6.786689886
4933439K11Rik	6.103875798	6.224845685	6.022673252	5.664297183	6.477652966	6.434639185	6.412233418	6.356180203	5.886889136	5.80893303	6.03351123	6.447940515
4933440N22Rik	6.959790175	7.102534199	6.960875572	6.734637178	6.763522099	6.310144112	6.289656	6.408157648	6.589540671	6.900174634	7.062321372	7.170058119
5031414D18Rik	6.423963711	5.846071567	6.212285806	6.863344109	5.399223745	5.297337249	5.230747046	4.393484307	5.607309122	6.287087762	5.987463726	6.173668162
5031425E22Rik	8.738430841	8.484758384	8.610203866	8.422181284	8.536061465	8.233078918	8.251964493	8.435861735	8.149261107	8.705916111	8.561585054	8.565710394
5031434O11Rik	6.73182289	6.737105107	6.564749322	6.867472666	6.601487069	6.347686672	6.417915159	6.492908213	6.339623993	6.588142173	6.690269471	6.312553073
5031439G07Rik	13.01967802	13.09562387	12.99803725	13.20925339	13.1580112	13.60211344	13.49855165	13.20438653	13.31365302	12.79360492	12.99475334	13.07770232
5330406M23Rik	9.434928398	9.522903426	9.306059288	9.371272779	8.744524964	8.620745633	8.615878097	8.466476585	9.29679974	9.332604042	9.554315717	9.638503738
5330438D12Rik	5.790154533	6.049689874	5.619338111	5.500507472	6.091341017	5.889055587	6.094020209	6.332859164	5.738873002	5.68162309	5.907010233	5.787001916
5430427O19Rik	7.793396613	7.732864482	7.803950467	7.894804136	6.70388017	6.458386772	6.68080621	6.711613394	7.793802889	8.099828417	7.806322995	7.684662142
5430434F05Rik	7.570784155	7.647405382	7.684330034	7.289915177	7.465739861	7.016185291	6.947786694	7.572894373	7.078233908	7.451167251	7.482641196	7.251948375
5530601H04Rik	7.168010114	7.268312532	7.16377127	6.950850107	6.956605593	6.65116642	6.707627778	6.976835775	6.844650876	7.049787631	7.097867535	7.041580701
5730409E04Rik	7.671413632	7.487612907	7.701103442	7.735215308	7.259660422	7.153347918	7.112308962	6.879781549	7.397150147	7.687263376	7.514811797	7.713227344
5730455P16Rik	7.97277516	7.995300932	7.846381062	7.954327191	8.044002646	7.985579924	8.252995601	8.175255243	8.055374363	8.091271313	7.972775506	7.942569735
5730480H06Rik	7.13061813	7.155479459	7.116256461	7.295701161	7.275016122	7.25994324	7.312667541	6.822660837	7.166559701	7.156771254	7.143269951	7.453831955
5730507A11Rik	5.859477484	6.137299753	6.011571081	5.660905302	5.733266888	5.993670461	6.101542842	6.376228199	6.274428238	5.736202396	5.754058688	5.83003911
5730508B09Rik	8.301888165	8.345781104	8.152620438	8.173393991	8.733151444	9.200752801	9.397252292	8.857743067	8.594839691	8.083345395	8.08000657	8.598742242
5830417I10Rik	7.170186453	7.212183377	7.106947166	7.368614524	7.088642862	7.216971628	7.339878594	7.084878851	7.118865342	6.948539653	6.930868898	6.924201283
5830432E09Rik	8.147299468	8.515565168	8.032976418	8.376483465	8.518993029	9.046452051	9.152100648	8.404278708	8.530675591	7.634950869	8.011891021	8.416205914
5930403N24Rik	6.600288468	6.069798967	6.398068082	6.294357719	6.038140084	5.521064648	5.606951902	5.736944867	5.575808676	6.623373613	6.209217244	6.182934642
5930420M18Rik	6.378658831	6.380653515	5.904585757	6.119790375	6.365037463	6.276361251	6.382591603	6.132093221	5.885099183	5.971780712	6.341618118	6.376911881
6030400A10Rik	7.655691272	7.777031592	7.542111447	7.879522728	7.265879772	7.224478209	7.398945789	6.970729854	7.793272739	7.713333982	7.773786547	7.8645912
6030458C11Rik	8.590930278	8.526513813	8.539169792	8.30027796	8.716503389	8.790007075	8.86126288	9.013168663	8.590245815	8.581158594	8.49724681	8.58423286
6230400D17Rik	6.066135129	6.517253844	6.242291184	6.208804943	6.345348035	6.008402653	6.156026185	6.020888166	6.116376311	6.002202979	6.129542106	6.298166366
6330403L08Rik	7.913361479	7.92990444	7.929413982	7.954042258	8.038798577	7.724725251	7.554237459	7.765377001	7.555657067	7.853187432	8.024165682	7.788397865
6330408A02Rik	6.170252312	5.939499974	6.052254278	5.381007017	6.210253617	6.046679047	6.242167955	6.573125576	5.929378379	6.323705287	6.015462075	6.355751714
6330549D23Rik	6.33825727	6.354221546	6.395876279	6.593163585	6.577500904	6.446782838	6.588608304	6.239279383	6.672611714	6.787365504	6.603885304	6.755926919
6430511E19Rik	6.710918705	6.842539531	6.552142319	6.78667354	6.784216891	6.173522563	6.554302703	6.581640201	6.511151088	6.99022459	6.899841662	6.637972943
6430548M08Rik	9.971155248	9.746410332	9.917763373	10.05504908	9.531006374	9.881760642	9.719325889	9.595739705	9.78820414	9.662194788	9.653276499	9.639576975
6430573P05Rik	6.224233003	5.905347974	6.150408849	5.922745673	6.340944503	6.68001084	6.28099669	6.548610635	5.987656846	5.967475538	6.121428812	6.081478044
6430590A07Rik	5.723846056	6.02814698	5.712012555	5.213808113	5.93378316	5.789151286	5.913753889	6.355082517	5.794326797	5.634657746	5.826189569	5.883065384
6530402F18Rik	6.385396867	6.157753153	6.249333768	6.552308315	5.46692095	5.952169281	5.3746284	4.972970476	5.871388877	5.613784259	6.099744526	6.198427903
6530409C15Rik	6.073687101	6.109385254	6.062049151	6.214676241	6.387867576	6.46993218	6.592263926	6.396342787	6.354805593	6.237042837	6.162047194	6.205341242
6720427I07Rik	6.830695404	7.019707981	6.828835233	6.704876993	6.959485709	6.563688872	6.723261681	7.079873104	6.920484826	7.127269086	7.158569024	6.925915842
6720475M21Rik	5.995265445	5.876733394	5.935021819	5.996289136	6.256646066	6.341400949	6.34310963	6.647491358	6.188808045	6.222585213	6.162588108	5.796939062
6820402A03Rik	6.124733434	6.212392296	6.221799322	6.534453019	6.257965664	5.818319367	5.88614494	5.674422905	5.959909977	6.311897412	6.234664813	6.13373315
6820431F20Rik	6.742177079	6.825942837	6.73328578	6.809598764	6.539926153	6.538913918	6.616247854	6.197783002	6.515618376	6.432864854	6.448187975	6.790339842
8030453O22Rik	5.942855265	6.066118611	5.86142902	6.038458908	6.096576679	6.532661975	6.242417294	6.432145365	6.150203079	5.590854436	6.085788709	5.71903075
8030462N17Rik	8.433187331	8.372972998	8.353683404	8.47810593	8.625975736	8.623121275	8.751774375	8.588383004	8.509051659	8.572120454	8.462756948	8.501725793
8430408G22Rik	6.53975034	6.501933334	6.600822338	6.824896559	5.723489855	5.725931304	5.712409682	5.501509079	6.640751561	6.676127118	6.590759736	6.577586117
9030617O03Rik	10.08501301	10.22084685	10.2722226	10.23679025	10.6322462	10.43817422	10.39668821	10.48934251	10.21314509	10.27138324	10.2614935	10.20427155
9030624J02Rik	10.66562876	10.75446737	10.77778309	10.93999234	10.58325396	10.65478674	10.52384776	10.43166693	10.87379167	10.71342029	10.82104355	10.75101512
9130008F23Rik	6.573459918	6.63520797	6.365865137	6.667902569	6.431914787	5.966191002	6.12288841	6.177957454	6.229086506	6.633062238	6.745707664	6.388601188
9130011E15Rik	8.696929698	8.688182606	8.655687643	8.721597367	9.001074437	9.105831294	8.99091995	9.076519981	8.646290736	8.55028097	8.697687278	8.546177523
9130019O22Rik	6.07825594	6.484847172	5.973935377	6.243692375	5.916656016	5.500244283	5.869997396	5.744303318	6.112411303	6.122231805	6.263390486	6.119327566
9130023H24Rik	6.165200603	6.193120984	6.287078956	6.031839017	6.661908001	6.872921014	6.845163917	6.951769437	6.284775938	6.045842545	5.979641669	6.128276088
9130230L23Rik	7.100945303	7.175825619	6.72328753	7.425784091	6.752303802	6.30478912	6.422169357	5.381923907	6.406305777	6.778940143	7.114097996	7.451846885
9130230N09Rik	7.159613001	7.16976968	6.814425973	6.836230602	6.827663522	6.541526934	6.513475152	6.51417581	6.472596112	6.74857602	7.13197151	7.109466222
9130401M01Rik	6.363815367	6.175258996	6.627036044	6.552149005	6.080979914	6.046034086	6.01276355	5.720607884	6.377561606	6.601063806	6.182557294	6.549599998
9230112E08Rik	6.932407556	6.950210785	6.991142235	7.095971304	7.139183308	7.111148658	6.731349675	7.100539331	6.78348735	6.793718772	7.132586304	6.65856758
9330020H09Rik	6.009547766	5.761317402	6.004934057	5.768668449	6.014581503	5.665830715	5.505427934	5.6096669	5.323914424	5.920895575	5.837681702	5.969708344
9330151L19Rik	5.756488988	5.97603897	5.658880423	5.744421952	6.321954921	6.197959248	6.344289752	6.279612911	5.755243993	5.659689684	5.830517727	5.809653039
9330159M07Rik	6.188053437	6.312724116	6.318283819	6.61204652	6.192838688	6.008263238	5.826672603	5.997665912	6.246465089	6.30636986	6.482400792	6.017644783
9330160F10Rik	6.321675632	6.083238299	6.074381919	5.990150166	5.981441149	5.868969839	5.90418036	6.337201485	5.682129191	6.033037833	6.006683692	5.65789432
9330162G02Rik	9.913616341	10.11836501	9.671614123	9.813329436	9.93401488	9.523482581	9.632832042	9.671083584	9.436475289	9.642258923	9.979660346	9.799693491
9330175E14Rik	6.079092926	6.27263162	5.795922421	5.541980352	5.55698371	5.037645263	5.318364607	5.173059041	5.406879056	5.732678809	5.928668665	6.3279163
9330182L06Rik	5.763367405	5.631214202	5.189292324	5.366518192	6.5304878	6.553183318	7.068164784	6.834646714	5.539299554	5.648757238	5.575697651	5.631989852
9430015G10Rik	7.033429147	7.40344074	7.481886864	7.317909791	7.406890012	6.937056944	6.945473223	7.012425867	7.428094099	7.527915574	7.441053171	7.538077601
9430016H08Rik	7.419884474	7.48886454	7.309807049	7.500193357	7.596240773	7.349829643	7.528911074	7.277376451	7.33822975	7.515660814	7.515636874	7.576785189
9430018G01Rik	5.739351164	5.683012111	5.879683717	5.631537341	6.075795934	6.1077723	6.329135066	6.632185727	5.871867453	5.896230141	5.478195769	5.423291484
9430020K01Rik	6.233020972	6.496364583	6.219122669	6.318434607	6.797608722	7.469564513	7.341014885	7.261472043	6.95135725	6.016057849	6.421849391	6.402080295
9430025C20Rik	6.124713257	6.137084431	5.94026334	5.883618841	6.146382618	5.74165336	6.021878078	6.068964498	5.328813691	5.721171776	5.637768149	5.647326228
9430034N14Rik	8.348630049	8.336428475	8.022258477	8.137479478	7.999259922	7.807364564	7.791174982	7.534732987	7.790663132	7.994760064	8.325119644	8.466340638
9430038I01Rik	7.767711315	7.687755764	7.755594365	7.500702098	7.597120712	7.921810846	7.690242638	7.990151964	7.906689891	7.661955308	7.825684915	7.780667856
9430053O09Rik	6.002385824	5.900484257	6.292697745	6.389375197	5.982231458	6.09627729	5.936347502	5.959306732	6.449346028	6.437201764	6.204918064	6.085281381
9430076C15Rik	11.22688827	11.50738367	11.32936383	11.30490886	10.29380384	9.827734675	9.803981039	10.12428591	10.96080946	11.14638323	11.34815671	11.05230681
9430091E24Rik	6.260129608	6.440476304	6.211875648	6.367715826	6.64583668	6.625854367	6.673215209	6.604571784	6.345684623	6.185320241	6.366560055	6.279363302
9430092D12Rik	6.000880918	5.815488716	6.057968944	6.21767013	5.908051365	5.513259803	5.71115738	5.943948117	5.980285803	6.560469567	6.120091763	5.72759984
9530003O04Rik	5.487391089	5.918859071	5.709944982	5.972050238	5.913753598	5.276827987	5.611125222	5.627197184	5.893097697	6.098555327	5.97317218	5.694994963
9530068E07Rik	10.97728634	10.87177833	10.90588938	11.01001604	10.78730282	10.96159044	10.98812983	10.76152851	11.05931214	10.99053252	10.92988209	11.05235675
9530082P21Rik	7.117801784	6.929674942	7.192925047	7.232497164	7.074171722	7.059276252	7.006807104	6.688959245	6.867005996	7.070028308	6.859247352	7.137523093
9530085L11Rik	5.785946162	5.918913845	5.874218004	5.433273237	6.140906617	5.71103215	5.779999316	6.325082573	5.688218634	5.985125418	5.960854093	5.856715603
9630010A21Rik	7.028435419	7.159321093	6.776992336	6.847721622	6.120631062	5.86380779	6.045786458	5.916057502	6.447928	6.573865599	6.774215689	6.833215358
9830144P21Rik	8.241094549	8.11081471	8.201484031	8.068224376	7.825087257	7.539554921	7.234373161	7.805168255	7.525491054	7.941303229	8.155815667	7.718280229
9930014A18Rik	5.98153527	5.839145961	5.935161256	5.120898741	6.090927835	5.764992208	5.726909309	6.760181847	5.771526615	6.239851552	6.181919156	5.962909133
9930021J03Rik	9.278150343	9.210246327	9.056519574	9.113741395	9.33344544	9.301860698	9.548439868	9.459734648	9.054075177	9.153563935	9.060711518	9.092194917
9930022D16Rik	6.70574123	6.2950676	6.454322706	6.64553068	5.84220086	5.656230075	5.854931388	5.582455931	6.205572109	6.802216524	6.444260105	6.525527588
9930104L06Rik	7.174757376	6.748778609	6.848425905	6.845836606	6.747745409	6.573420894	6.781138807	6.764216897	6.719068873	7.319372156	7.012006947	7.031518156
9930111J21Rik1	7.609760573	7.266871794	7.595806468	7.485039802	6.626776417	6.345834628	6.392481014	6.468759067	7.189283626	7.813114193	7.437533133	7.472021747
9930111J21Rik2	8.625277827	8.474509585	8.742816662	8.511472975	7.857298255	7.268608924	7.532498976	7.423118803	8.203306221	8.942763795	8.410566666	8.751290525
9930120I10Rik	6.214126139	6.335764208	6.533900816	5.974051284	5.812970994	5.50090774	5.179854201	5.786134507	6.005840079	6.196265265	6.319182195	6.272751421
A130010J15Rik	6.477051706	6.396334369	6.557562863	6.556122987	6.468043649	6.524911384	6.41408986	6.336033699	6.50063531	6.524484912	6.474077942	6.55357398
A130048G24Rik	7.393788746	7.608653828	7.207795065	7.165920218	6.834949923	6.887415532	6.496012568	6.797109989	6.996864989	6.729534298	7.521796025	7.262573451
A130050O07Rik	5.827207292	5.76512005	5.701377438	6.101624954	6.004521745	6.056334539	6.102465723	5.77959873	5.90217939	5.912453838	5.930065266	5.852684743
A130051J06Rik	7.271034084	7.482687571	7.334705592	7.476860459	6.98809133	6.661607665	6.660638873	6.637171829	7.097177719	7.212007897	7.360958668	7.242270844
A130071D04Rik	10.01932437	10.37751378	9.946098917	10.14267236	9.286014013	8.551814727	8.904735919	8.821995528	9.732996169	10.10900605	10.18749972	10.07366667
A230046K03Rik	10.62720562	10.54296404	10.60554764	10.61547019	10.16714366	10.21207685	10.20056246	9.989127272	10.4663519	10.50566029	10.45459107	10.65610371
A230050P20Rik	7.433139281	7.367668893	7.20627049	7.271416173	8.25691489	8.258611989	8.461035383	8.314957083	7.148444197	7.212217487	7.171192495	7.252125112
A330023F24Rik	8.096712019	8.145131869	8.056973253	8.023241464	7.260392648	7.113041459	7.009425058	7.067415081	7.484900404	7.583831743	7.775606759	7.751348525
A330074K22Rik	6.720306492	7.080918207	6.701666184	6.492938996	6.907906602	6.877846855	6.899497953	7.439512422	6.712832078	6.382280109	6.739881035	6.408593754
A430005L14Rik	7.778097947	7.628069229	7.710067545	7.861270095	7.882066288	8.061189151	7.969092257	7.987145546	7.901185055	7.87209091	7.882189487	7.712933649
A430027C01Rik	6.351215733	6.317937576	6.362109222	6.576937507	6.341500246	6.342322725	6.198316605	5.834683564	6.302973088	6.335428767	6.43526324	6.584067997
A430033K04Rik	6.165354848	5.58168541	5.97562422	5.781095403	5.949948541	6.270095619	6.132646414	6.737637782	6.212242334	6.475764694	6.219275089	5.808812539
A430057M04Rik	6.135024254	6.191837798	5.730502824	6.03413565	5.847342157	5.751187512	5.975451221	5.835728612	5.712636416	5.751977516	5.989048782	5.825138564
A430110C17Rik	7.422799844	7.346128401	7.612626139	7.804365206	7.868945917	7.637479605	7.754465084	8.040495956	7.667638518	7.975776274	7.592293057	7.114523118
A4galt	5.67907589	5.84799924	5.928046094	6.062741811	6.066450606	6.081402678	5.789632448	5.632673345	5.567934482	5.38405906	5.595782435	5.618045822
A530013C23Rik	7.548221842	7.159800295	7.214442831	7.571454813	6.622887315	6.499640606	6.540495862	6.40569197	6.847629442	7.359297698	7.263799906	7.041591816
A530017D24Rik	7.27221631	7.057418644	7.344455432	7.269782028	7.263138773	7.320962679	7.384307455	7.609567891	7.302173999	7.459147759	7.108766196	6.958179164
A530041M06Rik	6.253983359	6.028969197	5.877053014	5.518475993	5.973902034	6.061245228	5.820376251	6.291425241	5.557486167	5.695157134	6.087942294	5.975470325
A530064D06Rik	6.4840682	6.791958045	6.389029754	6.406755264	5.985807521	6.014605042	6.220356474	6.071516894	6.325451905	5.98876454	6.185941399	6.317055469
A630001G21Rik	8.16659827	7.938848241	8.244173333	8.319590409	7.572569844	7.3245861	7.259021199	7.487763339	7.72963734	8.205371113	7.965610922	7.661451707
A630033H20Rik	8.854992373	9.358324443	9.194827604	9.106887868	9.006628195	8.831715965	8.987738457	8.713298068	9.558671845	9.230252005	9.237726352	9.600106477
A630081D01Rik	9.386242611	9.758355184	9.51333168	9.797115324	9.541457933	9.102530201	9.128911873	9.228211261	9.769097173	9.835912333	10.05455416	9.671471132
A730017L22Rik	6.253278404	6.327978024	6.317631672	6.433037384	6.464011019	6.128419199	6.304809195	6.514838564	6.412280651	6.673172851	6.507129207	6.181694127
A830010M20Rik	6.526010143	6.379007578	6.250599756	6.505890007	6.072696774	5.806489292	6.224969576	6.046273072	6.19055439	6.603764438	6.313691975	6.237098229
A830080D01Rik	7.86690619	7.957596468	7.640981323	7.812541244	8.332551216	8.061245907	8.311908479	8.153420132	7.659514019	7.84012905	7.906081623	7.893010048
A930004J17Rik	8.097784426	8.149631618	8.107501658	8.229812058	8.219529844	7.903977109	7.813301354	7.881376515	7.926151172	8.189856715	8.322662429	8.132276869
A930006L05Rik	6.469344079	6.64395477	6.4105932	6.654636447	6.44247624	6.529008805	6.652807213	6.353698773	6.563037056	6.3018938	6.411456963	6.466522155
A930007I19Rik	7.074255213	6.379036407	6.971496031	6.830702278	6.338002734	6.335267218	5.987402729	6.046839774	6.223175549	6.92112987	6.676534736	6.757891444
A930011G23Rik	12.38222317	12.50093213	12.63756119	12.74699688	11.76092641	11.71657129	11.50865641	11.38004012	12.63963556	12.56528172	12.63656753	12.65574814
A930033H14Rik	5.955326699	5.832730632	5.64253344	6.030212595	6.271166055	5.836086176	6.201293045	5.82101231	5.445922035	6.003597981	5.828588304	5.821189883
AA414768	6.397992135	6.244711892	6.271646904	6.495642686	5.350832567	5.500649149	5.422591704	5.090891138	6.089035118	6.092498779	6.143621211	6.251325997
AA415398	6.091582211	6.008273208	6.140787897	6.103284855	6.333532075	6.186209974	6.105624729	6.257240161	5.898351938	6.128983043	6.077053599	5.962941209
AA474408	6.170933244	6.188868498	6.280354819	6.008218224	6.074267254	5.923973376	5.662923933	5.849216675	6.042865188	6.175223812	6.344786934	6.430630787
Aaas	7.841356436	7.922905526	8.08655318	8.118863473	7.626649447	7.269248018	7.459332145	7.599604504	8.101455345	8.377307683	8.023575903	7.850993251
Aacs	8.74428964	8.832078056	9.051549598	8.942583141	8.613253178	8.813389862	8.565147988	8.823094045	9.218904625	8.930979525	8.959749858	8.810770256
Aaed1	8.322207249	8.126206497	8.202367297	8.004354697	8.195507649	8.53484678	8.289425366	8.570216554	8.182247865	8.038909486	8.2081701	8.125391513
Aagab	10.28406777	10.26646976	10.16318525	10.02459562	10.86045046	11.10418549	11.12413331	11.07702952	10.217595	9.991457984	10.07479468	10.2604881
Aak1	10.9613046	10.92830752	10.9145081	11.18536128	11.07677785	11.38775941	11.34150054	11.09474833	11.01542191	10.73743743	10.79749572	10.77339474
Aamdc	6.648414261	6.659543686	6.394113608	6.665003241	6.688483435	6.824455105	6.971950549	6.713481023	6.44274399	6.295642895	6.413577529	6.401157422
Aamp	10.15742433	9.944600193	10.10344603	10.03206137	9.925311191	10.15738826	9.9766875	10.0225773	10.03181271	10.01255978	10.0344147	10.05990956
Aanat	6.413622474	6.281562142	6.369202492	6.524515866	5.538549055	5.465050966	5.578957708	5.805730895	6.136671489	6.34222991	6.140682817	5.758596257
Aar2	8.992420307	8.832162329	8.948639926	9.045424686	8.818968751	8.946556337	8.801262755	8.701502546	8.928225243	8.960895636	8.989711621	8.99268707
Aars	10.81556901	11.02089605	11.0437135	11.31376791	10.96903303	11.15995103	11.02649494	11.03611767	11.54906012	11.15281508	11.26345372	10.98377658
Aars2	7.338804007	7.370664345	7.37767864	7.514491267	7.446397499	7.522672488	7.24209153	7.296067593	7.337670793	7.229535467	7.50310213	7.31231344
Aasdh	7.169918072	6.946568354	7.041835589	6.949306618	7.168393533	7.220018352	7.17430343	7.347734389	6.807930103	6.979655002	6.930102689	6.849200702
Aasdhppt	7.519118962	7.334685924	7.3624873	7.297501217	7.487752745	7.660729841	7.589582266	7.779035958	7.621039069	7.632495012	7.675841211	7.551373601
Aatf	8.235119925	8.095047418	8.073770358	7.864100856	7.974367126	7.957160474	8.025916986	8.292074074	8.21281106	8.370090219	8.322610768	8.266123182
Aatk	8.744177629	8.471489267	8.769279938	8.815517869	7.675445536	7.297669808	7.593839933	7.306578048	8.098693166	8.749157257	8.155196461	8.396220414
AB124611	10.10320038	10.16127946	10.1926331	10.12365652	9.3476153	8.680229509	8.833526769	9.036160269	9.664313188	10.2736199	10.088969	9.955312076
Abca1	12.4432135	12.37810013	12.32763564	12.54391225	11.76920877	11.94905837	11.83475703	11.40344834	12.247315	12.13257876	12.2973446	12.51237668
Abca2	10.39700903	10.88328643	10.53493348	10.51124192	11.30585599	11.69337586	11.6717444	11.56760491	10.80604559	9.93224832	10.30223273	10.43006378
Abca3	10.49833917	10.48507787	10.63142815	10.67332268	9.758351868	9.751243207	9.487464603	9.671489744	10.28370491	10.30407488	10.4215032	10.19558353
Abca5	6.531054935	6.745128783	6.718476164	7.057518724	6.918254352	6.783459758	6.442432193	6.549664119	6.841899227	6.762619973	7.130300157	6.684025671
Abca7	10.06781116	10.06238854	10.18453902	10.34272139	9.676220755	9.803638257	9.420598841	9.566376291	9.916468443	9.794473563	10.0553625	9.751402677
Abca8b	6.853892998	6.409899378	6.508802239	6.74856192	5.295433535	5.275055237	5.91865693	5.435194611	6.433218239	6.897590157	6.155085602	6.398788241
Abca9	6.53768934	6.599958536	6.366478507	6.144863159	6.329250735	5.844490057	5.958999391	5.925560395	5.763479368	6.18597085	6.304941545	6.559995889
Abcb10	7.861951785	8.150403491	8.101491047	7.682142523	8.465401609	8.570851295	8.494800668	8.744939361	8.22489584	7.830994448	7.955957519	8.125167349
Abcb1b	9.093965366	9.011337445	9.41253108	9.203315037	8.180450098	7.68276817	7.812794907	7.894933727	9.106478679	9.686788528	9.155568156	9.282645379
Abcb4	9.710110584	10.089453	9.551866069	9.412833256	11.28855934	11.33742871	11.8197953	11.73172606	9.97352306	9.545311275	9.600531617	9.827633665
Abcb7	10.51445122	10.59790327	10.53221492	10.5226299	10.75889452	10.74059624	10.85349537	10.98307897	10.92739587	10.86224209	10.81503132	10.69503274
Abcb8	9.241119173	9.574373004	9.388011828	9.340221326	10.13330106	10.41194911	10.35455052	10.47716422	9.853797374	9.241895492	9.485655259	9.410832064
Abcb9	6.696811399	6.586512395	6.595377731	6.832074492	6.670207005	7.086583741	6.891481889	6.332475178	6.483717323	6.177639592	6.363876108	6.686186058
Abcc1	12.82682025	12.9031679	12.91100965	13.06000962	12.56204783	12.43210877	12.41849392	12.21428622	12.70190177	12.75549317	12.76126628	12.81647401
Abcc10	7.732563964	7.458887074	7.716699461	7.832248497	7.73924548	7.942148653	7.560370189	7.391039692	7.075764171	7.146537888	7.270503965	7.324285426
Abcc3	10.77843277	10.67597527	10.81910997	10.88718077	9.637428868	9.221222282	9.322872711	9.240595061	10.15663845	10.67530253	10.43051741	10.44472425
Abcc4	8.755298629	8.84161159	8.906243265	9.000582798	8.577397074	8.551689969	8.266873303	8.262017915	8.756634399	8.696028543	8.916213534	8.826729388
Abcc5	11.4354842	11.42029856	11.42673316	11.41288718	11.3550067	11.42136958	11.48261066	11.27379433	11.26939057	11.21821334	11.15053765	11.37319997
Abcd1	10.5458469	10.45404633	10.60439852	10.63575103	9.9248472	9.762976198	9.743793587	9.956878125	10.29843797	10.55210954	10.42093996	10.17650291
Abcd2	6.901517676	6.916657567	6.931404614	6.788134884	5.935433439	5.495535665	5.780061204	5.277564262	6.385962275	6.810720159	6.511447572	7.157214243
Abcd3	9.681582905	9.697113858	9.496347196	9.694811158	9.844781935	10.14976628	10.2985532	9.858840158	9.798828835	9.478313533	9.530293281	9.77154236
Abcd4	7.110762896	7.009371043	7.280645639	7.058869383	6.240878105	6.200715215	6.036031465	6.22667159	7.077729418	7.219284161	7.112693315	7.143829445
Abce1	10.3408602	10.43991623	10.33537851	10.48146391	10.52606417	10.47326085	10.61388502	10.57388823	10.72559086	10.67933815	10.6432517	10.53716309
Abcf1	10.67402066	10.54411108	10.55971623	10.74718018	10.62970158	10.83759116	10.7588207	10.74639236	10.66735001	10.58937002	10.65253533	10.47749971
Abcf2	9.658649387	9.556261477	9.664909222	9.781094704	9.66050811	9.682830463	9.718313099	9.760166229	9.781085098	9.861150655	9.717020274	9.558981662
Abcf3	9.412874295	9.429910122	9.472815709	9.468024369	9.360266558	9.579999244	9.335939585	9.491225567	9.422927014	9.1861585	9.387312572	9.23681793
Abcg1	11.51079187	11.56255172	11.35018189	11.48151592	11.40983876	11.44951514	11.36440915	11.22307231	11.33750587	11.24606964	11.54354546	11.55354827
Abcg2	6.538982419	6.45937945	6.51168783	6.64098273	5.929688772	6.099610706	6.020576164	5.537626912	6.488205201	6.397886237	6.424612398	6.778266751
Abcg3	8.475602836	8.269628595	8.540144691	8.279189446	7.877786759	7.222420542	7.403785414	7.798683124	8.174490951	9.035831408	8.583950441	8.450007976
Abhd10	7.48304198	7.498029726	7.680941069	7.800766299	8.00579706	8.052788789	8.072092413	8.052954555	8.000207494	7.938228019	7.736013053	7.63532568
Abhd11	7.129248347	7.398412126	7.288464683	7.532721278	7.703675251	7.628282806	7.610157289	7.669332388	7.470916473	7.277145139	7.405218098	7.101786404
Abhd12	10.82834982	10.65150378	10.71100598	10.91578297	10.2150768	10.14321029	10.22485112	9.995793268	10.49075255	10.7394651	10.59832207	10.62260293
Abhd13	9.298494024	9.276426114	9.173013166	9.185756608	9.430251502	9.802737164	9.847159525	9.672271922	9.402683899	9.052266147	9.111256734	9.273400895
Abhd14a	5.895920097	5.884116116	6.110024242	6.203305686	6.288972236	6.195137511	6.111942337	5.49595048	5.954889297	6.060528002	5.91781505	6.440525464
Abhd14b	6.48897893	6.559703611	6.355520733	6.180128094	6.218285493	6.08706573	6.435241552	6.334083399	6.336596849	6.397091931	6.253098986	6.529649778
Abhd15	6.257679266	6.200688281	6.362764794	6.334006794	5.675006773	5.751264607	5.756898575	5.654843609	6.222675782	6.203408933	6.035698451	6.166511417
Abhd16a	9.191683604	9.164048327	9.264281439	9.310894554	9.078754049	9.14384215	9.161845203	8.857930048	9.165898868	9.128446044	9.01020988	9.267511919
Abhd17a	9.28395986	9.182901517	9.235273058	9.31611902	9.4008369	9.621910928	9.512942085	9.534241003	9.341025602	9.221009917	9.277607219	9.17546234
Abhd17b	9.224346515	9.261870854	9.104359603	9.081533032	9.193314235	9.190933057	9.252837219	9.091587895	9.198731682	9.163588522	9.259195611	9.443271506
Abhd17c	9.781756499	9.854706799	9.785738432	9.800498754	9.983733556	9.834617472	9.965902154	10.03184765	9.740685687	9.816851473	9.754535156	9.673829339
Abhd18	6.725119415	6.593389628	6.689357961	6.786742095	7.156194206	7.352973142	7.389422892	7.209385086	6.661250905	6.596201756	6.463783673	6.546437345
Abhd2	10.6583598	10.74412071	10.69070972	10.89368484	10.44277298	10.49973053	10.58120109	10.34755272	10.84483364	10.70211518	10.67405561	10.70472886
Abhd4	9.862463841	9.814492088	9.771193683	9.91920647	9.515265537	9.359144884	9.480101528	9.300439793	9.497162924	9.701255331	9.623597092	9.65524604
Abhd5	9.380434695	9.375811744	9.396899305	9.472003135	9.373646241	9.739762518	9.727875712	9.441638525	9.696863545	9.335370218	9.326169463	9.537302821
Abhd8	7.424244724	7.403600072	7.547812689	7.296938323	7.523132954	7.432642715	7.233637526	7.616975595	7.3467617	7.457896591	7.512689163	7.38022546
Abi1	11.87774266	11.94355103	11.92312265	11.87684138	12.13721724	12.01275398	12.12166435	12.04302017	11.96888122	12.0275361	11.93905411	12.06397956
Abi2	9.199123374	9.199767806	9.193576996	9.303468739	9.111652606	8.778119522	8.895931871	8.900665146	9.127858117	9.460746769	9.34912523	9.234500212
Abi3	6.813292558	6.96112742	6.731508904	6.802456653	7.113873231	7.06229662	6.953045139	7.01725766	6.580710968	6.484452717	6.823322714	6.688162444
Abl1	11.00829102	10.73482581	10.9284821	10.99758717	10.57207126	10.72819283	10.40245458	10.45106092	10.53173676	10.6490804	10.78116236	10.66345094
Abl2	12.01752246	12.49137235	12.16631451	12.26961249	12.95949234	12.76095012	12.78876491	12.54302782	12.26087394	11.98556627	12.28280932	12.42524843
Ablim1	9.012687332	9.692767228	8.903362012	8.649440686	10.7003704	11.22528179	11.46962796	11.46857552	9.67976265	8.474771363	9.019830412	9.274804173
Abr	12.7738725	12.78069762	12.69446153	12.92141745	12.97765326	13.31755763	13.23501491	12.94047834	12.77761378	12.43088428	12.59966309	12.66724374
Abracl	8.240063471	8.152724397	8.077280569	8.051802976	8.39086214	8.635659863	8.676937181	8.515276623	8.371772207	8.214313558	8.248480068	8.435618218
Abt1	7.450583224	7.451961101	7.698644765	7.404804606	7.7799564	7.766532811	7.507811449	7.50087417	7.537248465	7.549294177	7.561331876	7.862109314
Abtb1	8.849336815	8.571212352	8.790769435	8.555712746	8.405990952	8.438356581	8.425323778	8.59415315	8.352383149	8.598141983	8.391617702	8.45784502
Abtb2	8.14216099	8.378215277	8.340212241	8.372193286	7.871473888	7.959183611	7.679157112	7.699517624	8.065491015	7.741727005	8.05975654	8.007414983
AC122844.3	6.139205081	6.167657577	6.205238915	6.281588497	5.747915518	5.442851403	5.639797758	5.145285355	5.616017522	5.89262914	5.658101447	6.07626427
Acaa1a	10.08019725	10.09792471	10.22730515	10.24204794	10.05067443	10.2183721	10.0021973	9.821131159	10.16376201	9.978336875	10.06513123	10.23145458
Acaa2	9.892269361	10.21079121	10.05066701	9.940071702	10.98361293	11.28209381	11.28106626	11.12177117	10.42262594	9.805623213	9.966774965	10.23666536
Acaca	8.885869205	9.149860859	9.024933227	9.246804451	9.243076112	9.270143657	9.187654229	9.092491397	9.140663364	8.849604165	9.057021224	8.930312833
Acacb	5.973037565	5.643283587	5.580469219	5.922595991	6.057143178	6.39755317	6.231487624	6.22304331	5.593235551	5.582579538	5.811459451	5.477776994
Acad10	7.577710777	7.661540648	7.500566326	7.928522373	7.913005582	8.727168655	8.778815223	8.036205823	8.325926567	7.427933624	7.537261378	7.851914732
Acad11	8.539418587	8.630070249	8.550325567	8.351252727	9.406160393	9.702039874	9.738684137	9.613720616	8.913883559	8.527352415	8.570452834	8.894489195
Acad12	7.299685259	7.44629946	7.228260769	7.316671894	7.515638311	7.71299526	7.687171416	7.2886171	7.100328542	6.756357392	7.000219927	7.310363118
Acad8	8.33361155	8.483966689	8.437323886	8.215472182	8.553416943	8.547151562	8.551355328	8.61492172	8.42581597	8.281726212	8.324165249	8.482450561
Acad9	8.090776085	8.271576328	8.418285535	7.909096559	8.384924048	8.52858096	8.211801598	8.741495745	8.534357977	8.209900822	8.379970977	8.359465806
Acadl	10.00592577	9.859468136	9.901269108	9.894492128	10.23108265	10.34044125	10.39489569	10.1699859	9.970679895	10.00777893	9.911523517	10.14321028
Acadm	9.72396485	9.873859788	9.89167118	9.643295003	10.36350296	10.41959954	10.535963	10.5895622	10.08104318	9.87505167	9.740876812	9.935653794
Acads	9.060710817	9.324851348	9.01238556	9.194577289	9.841555834	10.22531985	10.31162707	10.09488531	9.416301503	8.768396954	8.994555526	9.029105556
Acadsb	9.536791758	9.398598974	9.532568313	9.452675685	9.526472085	9.635488387	9.628902929	9.431607645	9.468686699	9.497863182	9.3704793	9.647667212
Acadvl	8.865575225	9.014352798	8.922886235	9.138091348	9.2127884	9.434889861	9.294713058	9.084729938	9.12957213	8.758693097	8.990336462	8.985114469
Acap2	12.47242373	12.70899629	12.45935193	12.40995893	13.30823676	13.74382808	13.80093505	13.6214013	12.99220732	12.32004344	12.51258083	12.74150759
Acap3	9.134378277	9.257917025	9.08230539	9.155687509	9.14933696	9.236252601	9.08303991	9.114003494	9.008138453	8.797684064	9.126508389	9.022162687
Acat1	9.704815839	9.868092156	9.686614269	9.4947198	10.52753466	10.6883825	10.79450144	10.7724904	10.09164724	9.767523083	9.842882036	10.05678754
Acat2	6.847978368	6.825432021	7.079446296	7.228463165	6.91185151	7.183126731	7.021042121	6.733448553	7.553310837	7.304581962	7.212652297	7.351228996
Acbd3	10.42891973	10.52415355	10.29974526	10.41321075	10.31410928	10.49347277	10.5997955	10.2656826	10.54883432	10.27423701	10.39232258	10.61296998
Acbd4	6.852198208	6.36804875	6.729071496	6.641457539	6.465252307	6.745213311	6.633326738	6.495108906	6.535363518	6.739551972	6.490415799	6.716247589
Acbd5	10.18559094	10.23624536	10.09500831	9.923641392	10.11416136	10.12862128	10.40566376	10.06455776	10.12874769	10.06363335	9.927827922	10.44030083
Acbd6	8.410311287	8.428691375	8.398969051	8.357592235	8.502398192	8.450719844	8.43675113	8.706227463	8.465827242	8.499125502	8.54281654	8.314717022
Accs	7.36083197	7.370265936	7.463950162	6.957777863	7.807521849	7.622470767	7.434327268	8.124173465	7.268688183	7.4443053	7.538764573	7.355090675
Acd	8.037781124	7.712623224	7.778188738	7.882576847	7.679540642	7.784245407	7.802363623	7.940557426	7.680243979	7.900697115	7.817013384	7.574431473
Acer2	6.27198855	6.275824361	5.937327317	6.252712883	6.704419453	7.396911133	7.330108635	6.674537163	6.112741222	5.416413731	5.821713272	6.161899178
Acer3	10.10452565	10.10123392	10.13306339	10.11147031	10.52424214	10.53055927	10.71325854	10.49624397	10.30472643	10.30170102	10.08717228	10.32577993
Acin1	10.83104536	10.67289069	10.79445137	10.816076	10.76035803	10.7785358	10.61077711	10.67765379	10.58678928	10.72676618	10.77296419	10.68446288
Ackr4	5.714838074	5.712376411	5.757732406	5.541176079	6.131978857	6.331048938	6.314094359	6.074614007	5.84828078	5.651672362	5.623270946	6.079307626
Acly	11.7178095	11.93276213	11.85364013	11.75968332	12.17346961	12.45583677	12.31497886	12.27696436	12.11954284	11.62222304	11.84220296	11.97417427
Aco1	10.16690132	10.48587635	10.35363012	10.3303877	10.95990869	11.22532401	11.21936997	11.15922699	10.78934981	10.20495945	10.34315972	10.42654512
Aco2	12.25305872	12.6478517	12.27795192	12.1836848	13.31073368	13.63043962	13.81447428	13.75850584	12.82710639	12.11260746	12.29847259	12.44870815
Acod1	10.73351213	10.97486922	10.96277211	10.89171525	9.14179213	8.975091727	8.806524063	8.719297264	10.32071243	10.24605573	10.42672051	10.58500417
Acot1	5.810529832	5.843737518	6.19799168	6.39047808	6.030150105	5.873317472	5.74581719	5.656266883	6.290408799	6.414033746	6.187279866	6.084343773
Acot10	6.565135709	6.915439221	6.745173403	6.669720177	6.715518818	6.591932356	6.717085812	6.64526526	6.817120308	6.590403259	6.635515621	6.782789399
Acot11	7.811041646	7.836132521	8.170296808	8.170671909	7.49008879	7.647199149	7.57679325	7.281801825	8.228528763	8.04632753	7.78256914	8.077185465
Acot13	8.131359968	7.95268243	7.816169443	7.763946714	8.323530222	8.479940425	8.77279374	8.538491332	7.88419492	7.906462254	7.750121926	8.036647064
Acot2	7.762431736	7.696221356	7.738021081	7.480488003	7.983254184	7.940333491	7.908382083	8.125677542	7.866168337	7.975299411	7.965451094	8.005688714
Acot7	9.53708965	9.680078766	9.923640394	9.775537197	9.734629805	9.477067677	9.367292044	9.681280442	9.963800471	10.07837348	9.944587488	9.778702287
Acot8	7.948689051	7.827659146	7.934306193	7.486788777	8.193954745	8.123969336	7.99182145	8.240263735	7.505777773	7.696793087	7.722293926	7.921369057
Acot9	8.871803007	9.03259786	8.917477869	8.90032264	8.725805192	8.682554786	8.829336295	8.469611056	8.999022184	8.881477738	8.849816219	9.226696687
Acox1	10.5789543	10.7030192	10.60129972	10.65813714	10.82715728	11.04652612	10.98420933	10.89919434	10.69613475	10.35270101	10.51673728	10.54491485
Acox3	10.7621658	10.80321146	10.81873795	10.8151693	10.11721052	9.857679253	9.832774333	9.865142535	10.26432342	10.48280902	10.49218745	10.4633879
Acoxl	6.043218579	5.931404675	5.800548227	6.087256747	6.25306554	6.400304478	6.556593067	6.297219233	5.856495237	5.821070204	5.795638062	5.768303377
Acp1	8.039703889	7.863363988	8.055929074	7.693630512	8.151156483	8.241469499	8.206062812	8.432537566	8.245758738	8.331785623	8.174627224	8.310451031
Acp2	11.26075755	11.2427243	11.37528557	11.41958918	10.70027596	10.60102065	10.64671095	10.56401761	11.32086865	11.43815721	11.25990564	11.29829536
Acp5	14.91194998	15.38904567	14.71643585	14.59128111	16.45085557	16.91030201	17.52411662	17.06285085	15.47490754	14.5383654	14.59716061	15.18358113
Acp6	7.865845755	7.918050488	7.772219301	7.781654104	8.092567051	8.081019218	8.2884494	8.33816722	7.861628832	7.820971933	7.759372938	7.700220315
Acpp	8.861974429	8.886069638	8.774964247	8.945630217	7.765531009	7.688771398	7.962237694	7.925935309	8.629749551	8.682413952	8.520053047	8.385689462
Acsf3	7.837399197	7.816809346	7.883871835	7.731953409	8.342998069	8.508146709	8.443860788	8.621606739	8.022283676	7.877724886	7.874948318	7.849120793
Acsl1	11.40569469	11.6474635	11.59578451	11.82425074	11.26630669	11.09145194	11.15436261	10.9062282	11.7637377	11.69682364	11.68559195	11.70526013
Acsl3	8.675410328	8.843352019	8.607454985	8.49932692	9.636476854	9.819682679	9.999558967	9.974991678	8.944101227	8.592953712	8.648974457	8.781669811
Acsl4	11.1587876	11.21142915	11.05512412	11.31282873	10.98906229	11.23092532	11.41712215	10.95275871	11.38989967	11.09539509	11.06550329	11.27216211
Acsl5	10.47809276	10.57085078	10.68351017	10.69350705	10.5426345	10.52894128	10.46240601	10.57189521	10.86156694	10.78250214	10.73637802	10.61689193
Acss1	6.865181642	6.634470063	6.816972123	7.069869256	6.193737458	6.342360364	6.078732335	5.802668032	6.266886765	6.348975439	6.430101407	6.453268578
Acss2	7.697236547	7.88359966	7.562304365	7.772777493	7.653024091	7.416509599	7.637858904	7.34153167	7.454140803	7.504292182	7.604238171	7.690092277
Actb	16.52720652	16.54943812	16.62129378	16.6689254	16.51304473	16.78958076	16.71810193	16.62004945	17.00025898	16.70149135	16.70111452	16.75153537
Actg1	10.83134633	10.96006334	10.77811256	10.90564292	11.12964168	11.68346999	11.60625081	11.49181907	11.35615908	10.67361377	10.93278373	10.9196851
Actl6a	8.689763288	8.75222624	8.911148488	8.815426209	8.970738051	8.887794145	8.668338479	8.832351654	9.041778719	9.062259673	9.122793091	9.054502195
Actn1	12.24789741	12.5014894	12.4060684	12.42609447	12.99598126	13.31272726	13.24950634	13.19061032	12.78081437	12.21047637	12.3691183	12.40798824
Actn4	12.01317065	12.1864944	12.17106921	12.11920235	12.48540242	12.63458123	12.5826171	12.66704082	12.44624299	12.12374044	12.19112975	12.15857289
Actr10	9.336957709	9.375930402	9.387303081	9.39858891	9.57912205	9.694378445	9.836344378	9.551325577	9.589821003	9.435591914	9.282253303	9.555986274
Actr1a	11.02444818	11.13068438	11.10557438	11.15671138	11.12635318	11.21897774	11.29184956	11.19176052	11.30178411	11.10292335	11.05516153	11.10411357
Actr1b	10.35736369	10.40689121	10.30092527	10.48874622	10.62631729	10.88851783	10.93888359	10.75117538	10.53290495	10.22117689	10.27677707	10.27666433
Actr2	13.43644158	13.52560931	13.60191509	13.54838125	13.43900701	13.56792011	13.50570083	13.34613346	13.89599978	13.67791895	13.66383245	13.87693366
Actr3	12.51853315	12.63624192	12.54931125	12.60870327	12.7497173	12.8565618	12.91304345	12.71297651	12.87010235	12.64554909	12.6759981	12.81667302
Actr5	7.907782376	7.857961713	8.063761717	7.975370534	7.772372051	7.707245952	7.427786234	8.026347259	7.925159534	8.040106296	8.11376601	7.603596168
Actr6	6.761374919	6.770315069	6.758676563	6.45759737	6.543270872	6.664058543	6.822439011	6.989842117	7.052873196	6.923145374	6.776403412	6.910079499
Actr8	8.697261263	8.611286411	8.630197402	8.574218524	8.926283991	9.041638386	9.04060117	9.11857018	8.77809578	8.748716238	8.730842463	8.70885233
Acvr1	8.632872094	8.843330351	8.667398089	8.792852328	9.116136615	8.905466084	8.998514138	9.159491461	8.656831413	8.657043688	8.739927895	8.453496333
Acvr1b	8.675878833	8.694368824	8.892533798	8.944038996	8.685499122	8.781770894	8.767199091	8.474901373	8.801336293	8.68657453	8.502981358	8.743773878
Acvr2a	8.721247528	8.717538346	8.984454276	8.89302341	8.716029882	8.433568742	8.295632816	8.511380119	8.898679731	9.184850053	9.055870049	8.931553612
Acvr2b	6.236878115	6.635181556	6.479932806	6.791852285	7.168562154	7.334075868	7.288817615	7.027199103	6.690764542	6.126947385	6.32745439	6.277153421
Acvrl1	7.680123715	7.753138974	7.589850089	8.279037421	6.573872302	6.185676654	6.606596714	5.824156281	7.41245618	7.727636568	7.470005394	7.563258494
Acy1	7.009355299	7.346987786	7.204945105	7.114844269	7.9701913	8.163803676	8.216182455	8.290119381	7.594177034	7.062932171	7.152596073	7.168759983
Acyp1	6.234707898	5.907456541	5.873391121	5.913111253	6.057544047	6.258104984	6.086914729	6.060242526	5.613030285	5.739720704	5.944976379	5.931928451
Ada	6.359219797	6.194885264	6.530387668	6.413518629	6.526707902	6.476976656	6.334889287	6.275055438	6.452726055	6.666791834	6.473376799	6.650079686
Adal	6.742491368	6.60703799	6.863843976	6.759064368	6.898264838	7.070156956	7.226285449	7.185112353	7.023915943	6.987477203	6.574542724	6.720495429
Adam10	11.58293788	11.6630674	11.69584743	11.66671359	11.4425063	11.20018721	11.35300629	11.35818947	11.76830856	11.93049813	11.74489902	11.76884969
Adam15	10.62396912	10.55513683	10.66725218	10.8091939	9.623069587	9.417245173	9.507730996	9.382006364	10.39757132	10.67222802	10.46962685	10.45340976
Adam17	12.03685415	12.03199301	12.17330333	12.16168888	11.30853998	11.07494171	11.03603888	11.07093283	11.97516721	12.21362662	12.11121913	12.08793964
Adam19	5.906066437	5.76944371	5.989701573	6.105635729	5.993702258	5.579001312	5.519091357	5.173971609	5.244606558	5.79593023	5.635582323	5.864767915
Adam22	6.728512992	6.112812525	6.564457811	6.761612921	6.582190635	6.515025786	6.313783718	6.120300244	6.018473211	6.701338528	6.45093531	6.447263674
Adam33	7.327745485	6.772811283	7.196822847	7.308364252	6.918867075	6.296045171	6.184265426	6.053525334	5.805871396	6.983627503	6.671395685	6.690594371
Adam4	6.006316623	6.282947955	6.241473487	5.822823393	6.029373	6.029558299	6.055081088	6.198539095	6.144530071	5.867713439	5.883665118	6.158857206
Adam8	12.99279636	13.11372623	13.1907743	13.40413185	11.46766022	11.36528594	11.60411357	11.39350451	13.31346225	13.29490666	12.97903095	12.97628246
Adam9	11.37932467	11.26791307	11.55592428	11.41687088	11.27877943	11.31033651	11.23288662	11.15322885	11.52056868	11.6004232	11.38986188	11.60857304
Adamts1	5.729861947	5.675056256	5.526913689	5.8485407	5.25750569	5.812606602	5.677994516	4.761981236	5.912561786	5.412266565	5.695021218	6.289407487
Adamts10	8.692550306	8.372478687	8.660796356	8.476229344	7.854595924	7.852586614	7.689710993	8.021140811	8.036337882	8.358418812	8.232976762	8.086113958
Adamts14	7.111037786	7.244164517	6.818860198	6.924581002	7.771878302	8.306427323	8.46313447	8.04039684	7.259360852	6.5916851	6.860282272	7.177299099
Adamts4	5.79373085	5.730544389	5.661851776	5.78163701	6.518801806	6.980616116	7.300634637	6.468960815	5.892550456	5.493922606	5.242596699	5.954485287
Adamts7	6.869498449	6.793366941	6.64240069	7.042595773	7.278012526	7.328587681	7.445711674	7.409220906	6.982315884	7.007872237	7.041714494	6.678010181
Adamtsl4	8.024656141	8.090272174	7.979442626	7.650098486	8.048781827	8.001896794	7.74365375	8.393408253	7.940003229	7.921272229	8.290344822	7.969934458
Adamtsl5	7.395307301	7.248523135	7.343378581	7.59271307	6.32908766	6.399234691	6.657878484	5.769040116	7.23829828	7.314935414	6.961436176	7.600940054
Adap1	10.0154431	9.983543553	10.15012473	10.23050927	9.183783767	8.88739123	8.823949322	9.077614543	9.973146913	10.301439	10.19829973	9.864249973
Adap2	9.828556497	9.660996755	9.750598068	9.659069513	8.75926788	8.129358921	8.37784347	8.383952968	8.984648077	9.782116778	9.444030916	9.529449973
Adap2os	6.845686131	6.735033256	6.655783423	6.839865886	6.153427597	5.945765326	6.284319785	6.129124847	6.343413456	6.661728603	6.402423976	6.373536452
Adar	10.2984629	10.1449841	10.22967317	10.29787703	9.897998822	9.588150248	9.673394088	9.825132597	9.973143469	10.43647084	10.26653793	10.04659556
Adat1	6.600381517	6.729006466	6.33411528	6.365884488	6.683871198	6.519539955	6.807324654	6.465604702	6.346144628	6.381850922	6.488957409	6.798908154
Adat2	6.446572727	6.294186526	6.514478745	6.386978119	6.216589711	5.921424804	5.943012608	6.494559636	6.247489262	6.695040371	6.453160348	6.029113946
Adat3	6.317249048	6.448377718	6.228058629	6.335258082	6.30362768	6.188413691	6.108144167	6.266807724	5.907682896	5.891768215	6.192356828	5.926493818
Adck1	7.923434237	8.072063571	8.042285373	8.022788598	8.162707491	8.361973091	8.252723885	8.26343883	7.991427932	7.643532998	7.782560401	7.791342232
Adck2	7.462779784	7.391832591	7.408764897	7.310960301	7.512962877	7.515049005	7.484328571	7.667623914	7.186279374	7.255140438	7.268928567	7.183437819
Adck5	7.526433107	7.366118412	7.582418575	7.597530093	7.559274042	7.421342123	7.295704598	7.670566876	7.393699254	7.691945868	7.60128323	7.211309434
Adcy3	9.724594882	10.1325672	9.619047155	9.609243046	11.29064659	11.81485636	12.04071072	11.8252544	10.19610703	9.263924939	9.551590629	9.776851051
Adcy7	12.1676809	12.0517666	12.23400277	12.21435913	11.39524529	11.28477615	11.22220455	11.16380251	11.92555553	12.15193897	12.03227439	12.11032007
Adcy9	9.424568072	9.45227846	9.316500476	9.360385027	9.720382467	10.14355102	9.925709377	9.832105214	9.313846741	8.862967802	9.216587427	9.266307039
Add1	11.28532168	11.29421212	11.26039247	11.3099729	11.38704491	11.69313252	11.6117305	11.39950844	11.32369572	11.00871768	11.12393934	11.28658098
Add3	8.734258734	8.892214155	9.055883862	8.703279915	8.299707089	7.966259087	7.89982214	8.379899461	8.971998775	9.147491355	9.050258595	8.922785222
Adgb	6.650602589	7.040894774	7.079156059	7.354514752	6.748245302	6.696050088	6.656219798	6.274873969	6.894182162	6.556085191	6.557654196	6.663641332
Adgra3	7.955484532	8.391119797	7.803278954	7.702868192	9.194327971	9.816024182	10.03153341	9.858106045	8.490053313	7.432721836	7.805053449	8.078891578
Adgrb1	6.951954191	7.167161844	6.858014248	6.669956871	7.65580577	8.628957281	8.642876195	8.181822276	7.416855584	6.22849642	6.523725102	7.172836399
Adgre1	13.53117111	13.69768651	13.89866664	13.61211829	12.69261487	11.95393859	12.135461	12.30683857	13.33580084	13.90796172	13.52545917	13.64062996
Adgre4	6.681023274	7.108354354	7.536623028	7.263811674	6.285562806	5.926405169	5.451394028	5.540450676	7.016049118	6.947875676	6.994618143	7.178372848
Adgre5	10.93516719	11.0660998	10.78199267	11.03925837	11.34055089	11.46301387	11.56617546	11.22923254	10.93285725	10.67946167	10.86040721	10.94008443
Adgrf1	5.926299044	5.788364319	6.071262306	6.030214303	5.930425252	6.005069341	5.85385025	5.661292993	5.807571337	5.870861973	5.739183077	5.972788338
Adgrg6	7.437010885	7.775904224	7.740844382	7.363710786	6.764167569	6.768641873	6.651193869	6.54680097	7.679013311	7.335645668	7.488153513	7.969680008
Adgrl2	10.3512131	10.39167544	10.34099856	10.52303666	11.03185735	10.8784568	10.90178294	10.82336363	10.50121202	10.61415024	10.64150098	10.53788219
Adh5	9.844001688	9.938994073	10.00523214	9.845892161	10.07053012	10.057038	10.03165011	9.963162926	10.03709004	9.955589771	9.914739591	10.14256675
Adhfe1	6.144450178	6.322638398	6.329844427	6.58266132	6.559791564	6.644221448	6.738998524	6.264246739	6.58806863	6.325450526	6.223467421	6.445402314
Adi1	8.675584367	8.345765909	8.336277088	8.662892166	8.4848193	8.698761981	8.702739627	8.427948481	8.423076894	8.538952671	8.544463847	8.492639915
Adipor1	11.69044578	11.45742469	11.54940122	11.60094869	11.49516678	11.86982186	11.87570281	11.51449238	11.55721507	11.41558108	11.31772359	11.62738656
Adipor2	10.47583934	10.50190324	10.52364949	10.49191621	10.54111723	10.58685979	10.45246053	10.46568686	10.4596087	10.38780224	10.50045525	10.51896219
Adk	8.264222076	8.403186819	8.555219602	8.556217644	7.780899996	7.706899853	7.566239668	7.714898205	8.734179972	8.669215372	8.657842775	8.508186196
Adnp	7.324472948	7.500940989	7.263279363	7.275678212	7.404315258	7.171498654	7.184712475	7.280618199	7.067344126	7.123692689	7.348140494	7.239835921
Adnp2	8.703632436	8.48000033	8.695117606	8.857293993	8.293894503	8.23537653	8.329014924	8.37470927	8.736360125	9.018510203	8.709754533	8.501883801
Ado	9.919066046	9.884994615	9.984059086	10.09088365	9.509198126	9.377516348	9.348265284	9.358216067	9.93563989	10.1013931	10.03157969	9.91480434
Adora2b	6.802276592	6.742686762	6.847983578	7.007316343	6.23551718	6.251143411	6.191386747	6.278806082	6.809004058	6.852967657	6.807427505	6.560675404
Adpgk	8.422116026	8.287469484	8.454317185	8.347446636	8.702075057	8.812583564	8.82009801	8.849630643	8.518937606	8.543075641	8.368713494	8.44605141
Adprh	9.530245602	9.574252069	9.629987351	9.69508818	9.621653734	9.5570257	9.614229118	9.569371317	9.674415674	9.69503724	9.582098541	9.561855513
Adprhl2	8.209556743	8.061093668	8.14338419	8.26985308	7.82955038	7.795490128	7.551402743	7.639560933	7.885859285	8.068382611	8.230179476	8.015552395
Adprm	7.621832509	7.603245804	7.651779678	7.387666052	7.546469847	7.746134143	7.533328958	7.696891185	7.680927368	7.499849778	7.664121089	7.764672487
Adra1a	6.090389348	6.12530229	5.903695743	5.851363249	5.817959885	5.838380006	5.905215542	5.850028427	5.934998485	5.879665423	6.034436433	6.141956043
Adrb2	10.02967041	9.729329879	9.893034652	9.750928938	8.810941623	8.193604501	8.125725362	8.289007734	8.797878254	9.715555908	9.619730275	9.598553618
Adrbk1	11.65619017	11.49684365	11.74376299	11.77049023	11.31993341	11.27182469	11.0922641	11.23757999	11.42837683	11.63583207	11.56847333	11.39643019
Adrbk2	11.2984351	11.55271669	11.4211604	11.35692465	12.61077623	12.62023299	12.53060156	12.57414005	11.50942683	11.24568848	11.4668762	11.48757346
Adrm1	8.392815223	8.4232682	8.27873417	8.520732784	8.438024622	8.473398122	8.349678468	8.184387406	8.162739951	8.096913474	8.365167159	8.288459607
Adsl	8.789091883	8.961040891	8.954872076	8.862659419	9.01912482	8.86887191	8.841413572	9.106902005	9.130565071	9.108868973	9.142496126	8.96922035
Adss	11.01366255	11.18759091	11.01144155	11.13681175	10.91765187	10.67912185	10.85106888	10.67591775	11.26307461	11.32767628	11.3318786	11.38165954
Adssl1	9.688586149	9.828046376	9.658936249	9.664139279	10.29540744	10.70773124	10.88062726	10.6816136	10.24549123	9.693707198	9.689921303	9.883731935
Aebp2	10.74599362	11.01067839	10.72584615	10.81074692	11.26902748	11.1503786	11.16798866	11.10522153	10.87022146	10.72418557	10.99140775	10.96927411
Aen	8.282545968	8.561338974	8.352761051	8.448291291	8.473788718	8.449844206	8.503426024	8.405520268	8.608585952	8.353737458	8.508733563	8.511109079
Aes	11.726472	11.68438387	11.63852114	11.81171755	11.87577096	12.04068515	12.14505285	11.98052611	11.81701577	11.69418971	11.63568474	11.62701508
Afap1	7.354466163	7.280549589	7.122185101	7.22790131	7.329869788	7.843790817	8.210185879	7.823633753	7.477271578	7.037267122	6.829236547	7.110072465
Aff1	11.75619873	11.80066724	11.65137514	11.84223556	11.45331185	11.65928752	11.56605872	11.28625916	11.54389214	11.29344797	11.53596887	11.62490801
Aff2	6.189203592	6.37579233	6.367106734	6.343675676	6.689623885	6.899462157	6.895028185	7.218943195	6.800023646	6.403596637	6.416716205	6.116232252
Aff4	11.9080964	11.83782812	11.70376508	11.94817914	11.84638391	12.08940662	11.99716271	11.68664398	11.70558797	11.53283354	11.75914049	11.82524516
Afg3l1	9.796403811	9.915071083	9.926099566	10.02830129	9.909004929	9.982674955	9.960294529	9.819671319	10.13533782	9.943000517	9.954352461	9.992773945
Afg3l2	10.19843385	10.43635683	10.24006305	10.06983818	10.78373123	10.97864988	11.08047185	11.18409987	10.55006389	10.11722225	10.21169407	10.27829093
Afmid	6.133115349	6.476298014	5.886430247	5.841313465	5.975345364	5.397849208	5.888256508	5.941033679	5.676834302	5.911147793	6.01060826	6.002947871
Aftph	11.01190294	11.00412386	10.92380081	10.94732085	11.05750218	10.99118025	11.03316176	11.03648804	10.87012829	10.9442293	10.98257084	10.95572452
Aga	8.403623324	8.277065352	8.315862955	8.1573055	8.421136803	8.705273347	8.677567369	8.422445544	8.398278334	8.240699761	8.229608137	8.643287417
Agap1	11.51824252	11.92490533	11.45515558	11.44423033	12.64202889	13.03109638	13.08889707	12.93803506	11.86843894	11.07270864	11.4846577	11.64644496
Agap2	5.930937189	5.863173563	5.963807401	6.110712018	5.110710679	5.35358994	5.030611927	5.161439787	5.951622773	5.776507138	5.998851314	5.721118836
Agap3	10.84570636	10.9744414	10.98051846	10.86329215	11.388166	11.59237961	11.40992649	11.571973	11.03231496	10.69936631	10.87574237	10.83092216
Agbl3	6.237400626	6.127182272	5.799784465	6.120388729	5.926520128	5.59538443	6.170658515	6.052677377	5.944014054	6.385368106	6.137491827	5.934868702
Agbl5	7.946658014	8.220660192	7.790252735	7.785438209	7.840352268	7.685391926	7.870524451	7.772033281	7.502103083	7.383061247	7.628336179	7.731641875
Agfg1	11.22678658	11.37683469	11.15959268	11.30341571	11.13242204	10.99648627	11.1190756	10.7401028	11.08121328	11.06710094	11.16175362	11.39690339
Agfg2	9.194194358	9.365575935	9.203433579	9.30426148	10.01631448	10.13646959	10.28174186	10.35094607	9.592723241	9.301186558	9.31805664	9.148024527
Aggf1	9.807153808	9.745378717	9.782187189	9.714721681	9.789157686	9.754628411	9.760943601	9.933002715	9.763771293	9.860075658	9.816951996	9.71235839
Agk	7.856640429	7.92369136	7.847656694	7.864156303	7.897982566	7.999772285	8.122040456	7.827819453	8.079565103	7.910724453	7.864490948	8.142212342
Agl	10.61540839	10.65516229	10.59567567	10.6058281	11.09979293	11.41247092	11.46534544	11.28061938	10.86168906	10.50925717	10.51586927	10.69044291
Agmo	6.250760418	5.739430658	6.205050023	6.68062319	5.892631353	5.830943777	5.939946168	5.135229685	5.494835215	6.06785255	5.493230793	5.82237411
Ago1	10.49204548	10.56135998	10.58475591	10.60260019	10.50922867	10.58215422	10.34052539	10.34481498	10.40914688	10.26690684	10.48513974	10.46300586
Ago2	12.70419466	12.92777519	12.69336765	12.81568572	13.41922318	13.62413138	13.57257861	13.54480467	12.99968059	12.57119186	12.85715217	12.76260804
Ago3	10.97004325	10.80127175	10.92388985	10.94975106	10.79474361	10.83696972	10.76303256	10.7195051	10.70260849	10.82915388	10.78047294	10.79813918
Ago4	9.36320803	9.236979953	9.168473477	9.151625993	9.561275841	9.723942258	9.693538435	9.766328715	9.005147425	8.968709086	9.067619384	9.011676589
Agpat1	9.861527774	9.692055998	9.706979936	9.918955495	10.0092901	10.23693599	10.28838966	10.01059814	9.853057017	9.794882897	9.728505296	9.794321249
Agpat2	7.721500412	7.71016692	7.683704681	7.747275288	7.277075424	7.286451677	7.600676444	7.585779179	7.745134347	7.747091586	7.459329058	7.410655715
Agpat3	8.856525661	8.673383308	8.68376286	8.63981403	8.185559496	8.342909629	8.54915168	8.459375931	8.611159168	8.636951387	8.420329784	8.554054363
Agpat4	9.308409505	9.679643488	9.639569558	9.708642512	10.18028517	10.3176553	10.34645462	10.15120299	10.14989479	9.641290675	9.652565287	9.778743965
Agpat5	9.178043235	9.04670572	9.227833329	9.226095865	9.386516083	9.397155742	9.434660308	9.496317077	9.423099894	9.543797749	9.325165575	9.265246269
Agps	10.86552554	10.8276173	10.92888798	10.79695253	10.92349859	10.81780811	10.812781	10.99417083	10.96135703	11.10495575	11.00871218	10.9592578
Agrn	10.05476937	10.30552754	10.12016141	10.2505961	10.80158887	10.85162499	10.75497464	10.6437965	10.27723958	9.976445282	10.25846177	10.23920522
Agtpbp1	9.354936894	9.211486674	9.463746297	9.593985712	9.307288483	9.24772676	9.28125939	9.27187086	9.537612522	9.740624465	9.454832212	9.333981327
Agtrap	9.36194992	9.189503303	9.353843675	9.347397149	8.669930431	8.515717264	8.545764188	8.559591664	9.023862253	9.350522037	9.156134741	9.148753791
Ahctf1	10.63761947	10.75715956	10.63715152	10.80112185	10.96868644	10.83832641	10.85197704	10.80937931	10.7065443	10.71736425	10.82372165	10.70234906
Ahcy	6.739050955	7.022512451	6.996221787	6.669544457	7.235521897	7.254102933	7.194330595	7.56827509	7.379646038	7.077603505	7.163666507	7.116399343
Ahcyl1	11.29817532	11.27827749	11.37208493	11.3379549	11.17171678	11.09978257	11.04592227	11.13832106	11.38290265	11.47473469	11.43478755	11.37651879
Ahcyl2	10.25211071	10.27593926	10.25127842	10.25332321	9.699011558	9.610918539	9.629872215	9.848305784	10.19853252	10.26279699	10.26850415	10.04802579
Ahdc1	7.171552668	7.169744024	7.341416662	7.466327992	7.161026475	7.476826695	7.018758769	6.853651314	7.058068782	6.744077206	7.030472494	7.070668619
Ahi1	6.264226941	6.371223989	6.085947773	6.581808237	6.115003665	6.056459704	6.322963361	5.559931126	6.334981996	6.286528909	6.305301468	6.572473239
Ahnak	15.87037569	16.05364486	16.01609939	16.05050641	14.99251741	14.68634947	14.79449066	14.658813	15.86057716	15.98347592	15.9128802	16.01415084
Ahnak2	9.980390063	9.840106135	9.908433194	10.02615973	9.092551305	9.297437287	9.461583708	9.345775919	9.985121373	9.92051932	9.68804584	9.686127095
Ahr	9.66877428	10.00219047	9.672941986	9.70926066	8.935596577	8.419375412	8.496738205	8.641221636	9.439663902	9.622468875	9.874354567	9.693552463
Ahrr	9.433309809	9.53445638	9.927922455	9.528631683	8.59216043	8.22966204	8.078647118	8.786450287	9.688214816	9.949566634	9.707115482	9.398603085
Ahsa1	10.28275954	10.24634811	10.23159413	10.44078889	9.907491413	10.01844003	10.13854015	9.580994466	10.44248295	10.36794576	10.26259961	10.61095054
Ahsa2	7.350748664	7.238750075	7.19564295	7.595438752	7.005509117	7.14739773	7.026309842	6.56477661	7.051403383	7.02151336	7.185708373	7.247445803
AI314180	11.67783304	11.71285392	11.63403518	11.63901962	11.60718932	11.57980796	11.65572636	11.55296427	11.67550253	11.66786302	11.67076336	11.76854101
AI413582	8.573349553	8.3843292	8.561129856	8.662673589	8.17557359	8.256106052	8.1931334	7.90693324	8.417114762	8.525602653	8.41177465	8.596431076
AI467606	7.811685696	7.676852843	7.854708541	7.485200515	7.578108728	7.49939456	7.663001483	7.625892525	7.879228307	8.092775328	7.751312708	8.157929691
AI480526	5.733488877	6.001505235	5.715779986	5.231465943	6.257863777	5.980627908	5.97690075	6.426629255	5.221589176	5.230808687	5.520261093	5.554846632
AI504432	6.379746298	6.863904744	6.58043536	6.878796783	6.110155001	5.415271621	5.406191021	5.344927359	6.413430534	6.624155467	6.916705451	6.67960769
AI506816	9.468168404	9.884990954	9.84734985	9.953098042	10.10126701	9.689606319	9.819919044	10.11317311	10.33545543	10.33029357	10.23762195	9.838619687
AI597479	7.593596036	7.617929537	7.692760834	7.46243194	7.930412465	8.048092087	7.837524944	8.112827135	7.661532933	7.51951981	7.655255656	7.610282359
AI606181	8.022758421	8.118959125	7.835561543	7.989622135	8.214997495	8.547702704	8.428213057	8.463922641	8.180654034	7.751748121	8.154635348	7.964865173
AI607873	11.97531433	11.95773836	11.87376087	11.98750867	11.44928908	10.98060135	11.23675173	10.97497031	11.593623	12.07988671	11.90771381	12.05574742
AI661453	6.44468636	6.531975115	6.43403241	6.613320663	6.236812895	6.349398771	6.334335856	6.205873483	6.483812186	6.283937555	6.396943175	6.346117296
AI662270	9.454386706	9.525216679	9.359057667	9.427078577	9.77878388	9.699264913	9.88991387	9.65469018	9.59529247	9.603981464	9.57949152	9.7466943
AI837181	8.603668708	8.439185301	8.59229701	8.558789578	8.369625403	8.486182452	8.352721863	8.507252049	8.459701008	8.507627365	8.487976246	8.366953492
AI846148	7.263643547	7.111968544	7.078088755	7.332854425	6.989458477	6.923214768	7.192628322	6.831634703	6.987630417	7.205549129	6.970015365	7.076243314
AI987944	7.719392159	7.420631227	7.640469815	7.727445813	7.986259535	8.360896076	8.477925194	8.262584711	7.835778874	7.759903266	7.423035559	7.551400044
Aida	9.244492933	9.178228747	9.209944394	9.025777065	8.815382067	8.541307394	8.704613797	8.88868101	9.134539945	9.474878804	9.279856755	9.27995687
Aif1	8.878102973	8.866085699	8.967383318	8.608012573	8.155711723	7.517423894	7.628529269	7.697753059	8.120154138	8.770459241	8.558056247	8.848203202
Aifm1	8.779776868	8.982225263	8.93834036	8.60825766	9.307848493	9.525051202	9.403352635	9.601138714	9.094445262	8.674794159	8.840377627	8.97267425
Aifm2	9.211040371	9.300925921	9.236533777	9.17360303	9.268755975	9.51547038	9.491216079	9.529328974	9.371937863	9.035337909	9.123984353	9.148802206
Aig1	7.679555775	7.873114374	7.653766708	7.842516682	8.303005146	8.397674467	8.604666803	7.721879241	7.946308463	7.658080543	7.670435873	8.364473461
Aim1	10.77680087	11.04165987	10.96611346	10.9822766	10.67508874	10.34695444	10.32431389	10.64597656	11.04575995	11.10903525	11.20722221	10.8693964
Aim2	9.653765531	9.931978568	9.694205437	9.783703062	9.171821707	8.791362815	8.890692907	8.983285765	9.551958621	9.654204477	9.792647515	9.610557032
Aimp1	8.563858696	8.367649765	8.487759188	8.261964318	8.417768187	8.460627848	8.382434772	8.373471499	8.460944741	8.61429401	8.572377663	8.807135807
Aimp2	6.860997743	6.952606999	7.051389297	6.838416667	7.04127265	7.150179991	6.956076686	7.134278416	7.151048065	6.950531467	7.045852475	7.080623374
Aip	9.301086529	9.335069789	9.438694131	9.335496392	9.066788741	8.958386009	8.97183224	8.981062352	9.379466232	9.453885704	9.336815131	9.430782758
Airn	8.365765666	8.346094603	8.43373406	8.498686676	8.39261837	8.101011241	8.090799821	8.06565547	8.222515283	8.533793475	8.456365438	8.416557174
Ajuba	5.876879188	5.736525665	6.006158213	6.136830081	5.880793777	6.127072223	5.803041402	5.569733477	5.660116032	5.554191108	5.608589382	5.711225438
AK010878	6.705188313	6.503047116	6.250840967	6.751876256	6.548617004	6.509185341	6.545165325	5.920335136	6.250067136	6.491639997	6.707866161	6.831661061
Ak1	7.044689989	7.24381454	6.844875954	6.811947521	7.511104793	8.09232636	8.540737018	7.917656239	7.623091082	6.842744964	6.793272892	7.449282104
AK157302	6.907589808	6.850580294	6.649195149	6.567184159	7.258234491	7.665513822	7.600329258	7.427831604	6.805635412	6.455365594	6.721935304	6.976443947
Ak2	10.64840299	10.86761176	10.76416717	10.58229679	11.55713461	11.42000747	11.447026	11.56129143	11.00090164	10.91882002	10.99524608	11.06285103
Ak3	9.958969476	10.10418977	9.860644176	10.07264945	10.27128362	10.45874237	10.52898566	10.41159558	10.19702243	9.864343385	10.03764569	9.943030505
Ak6	7.193533514	7.028588797	7.012691826	7.252535006	7.131639194	7.298600789	7.310490265	6.780354783	7.121736776	7.119719899	7.123727393	7.414019696
Ak8	6.384179761	6.029374113	6.009442144	6.531463984	5.549542238	5.359438758	5.691812349	5.209466886	5.482050434	6.026959562	5.71451794	5.674841563
Akap1	8.445802016	8.425223218	8.52337586	8.441653995	8.913504365	9.14140291	8.912879802	9.165048806	8.672422654	8.465102907	8.595473373	8.425026233
Akap10	10.26399293	10.15178113	10.20082632	10.17242932	10.12151882	10.14200958	10.12339801	10.21645823	10.18233819	10.27405925	10.24362562	10.1789624
Akap11	9.987633156	9.84321143	9.849778113	9.988008938	9.989906489	9.937547162	9.973063525	10.05463084	9.91154741	10.10832846	10.06624542	9.846447276
Akap13	11.85307485	11.98840038	11.79913471	11.88625655	11.3290997	11.36225952	11.40414818	11.12555355	11.67879074	11.51030538	11.6576824	11.84915518
Akap17b	6.413661675	6.571404922	6.472142204	6.286679489	6.967067772	7.054411683	7.375134202	6.971786085	6.623141141	6.378053983	6.156594182	6.745405014
Akap6	11.55559719	12.24157626	11.64986105	11.48642023	13.17756154	13.60598625	13.87166686	13.80850362	12.65473167	11.54032789	11.86636249	12.09296655
Akap7	7.599738503	7.412848055	7.351422561	7.608727382	7.994076609	8.044378523	8.277403666	7.816048072	7.363509263	7.500097797	7.328498148	7.532548921
Akap8	10.02924058	9.843134752	9.894084224	9.950980921	9.975158238	9.930734706	9.953151135	10.19075582	9.859151152	10.08968052	10.01631462	9.721813232
Akap8l	8.685324051	8.359678299	8.493668986	8.352613632	8.283834132	8.519121185	8.309883463	8.455007233	8.034857416	8.125216116	8.200463151	8.196394734
Akap9	10.73266175	10.67926038	10.58981489	10.72861172	10.7318158	10.79928099	10.84291585	10.77440305	10.69777464	10.68371082	10.72952144	10.65923742
Akip1	8.302149709	8.515961242	8.241611578	8.081227705	9.223535655	9.219256604	9.476732497	9.425110655	8.633908619	8.424376138	8.441249908	8.653255623
Akirin1	10.35321278	10.12629063	10.13692347	10.35041363	10.0969901	10.3875241	10.45928892	9.969955757	10.28551437	10.22190253	10.13950487	10.41534787
Akirin2	9.50259852	9.556402503	9.401891438	9.503201665	9.671937187	9.68922939	9.780431985	9.695219975	9.571109985	9.500013799	9.563322269	9.547224052
Akna	10.01109316	10.15070873	10.07772921	10.17311756	8.81778638	8.523477119	8.500016134	8.361350711	9.624736938	9.779430631	9.875871132	9.91914821
Akr1a1	13.92997434	13.8054611	13.89694914	13.98472925	13.61146557	13.80284203	13.87043374	13.48768604	13.85534556	13.78848234	13.62940259	13.92437018
Akr1b10	9.205299077	8.919317917	9.076022547	8.854316859	9.043255575	9.096212903	8.984632539	9.218995284	8.853419152	9.086442983	9.041318718	9.02866166
Akr1b3	7.974029696	8.060709765	8.008464866	7.786897137	7.892551679	7.679631771	7.66512038	7.92856812	7.675048406	7.801288245	7.868044536	7.826164525
Akr1b8	9.89314796	9.91712753	9.881861781	9.83497757	10.13096896	10.13719165	10.39055826	10.11660534	10.06280957	10.0326073	9.814506448	10.13534358
Akr1c12	6.917545857	6.979221352	6.812228163	6.727854004	6.970150202	7.115274336	7.163194251	7.023112903	6.92350909	6.716709461	6.835782735	7.060238242
Akr1c13	8.559567881	8.455603913	8.394070828	8.468719878	8.703508794	9.04391697	9.059140814	8.779070844	8.680911513	8.444467306	8.490776547	8.696197467
Akr1c18	8.429176719	8.793266932	8.319976608	8.000534754	9.722463817	10.11986696	10.73980163	10.12679709	8.992017272	8.230523919	8.083879569	9.016325962
Akr1e1	8.141235697	8.136138167	8.051343194	8.188749238	8.157221321	8.033324146	8.145860775	7.763027995	8.142978477	8.271973182	8.244231526	8.489658262
Akr7a5	7.65862241	7.610337925	7.568181817	7.553958658	7.729341378	7.822497234	7.737841248	7.926801164	7.535905644	7.491034273	7.617846367	7.44310961
Akt1	11.78058612	11.66741685	11.77436906	11.89749573	11.69975206	11.75724097	11.74904334	11.75758661	11.83316536	11.88884572	11.79009113	11.65842119
Akt1s1	8.793694081	8.671057241	8.743433705	8.923551585	8.93929786	9.120953434	9.118452478	8.913955276	8.812314732	8.753295999	8.68342049	8.707799813
Akt2	9.821895063	9.718698888	9.938508439	9.881498059	9.637767159	9.632549656	9.381179434	9.560186996	9.709958609	9.818372287	9.849932958	9.727935776
Akt2-ps	8.32930101	8.176792384	8.247625179	8.446905061	8.131002474	7.998707826	7.998967183	8.100344197	8.076126328	8.360929602	8.28983745	7.989180553
Akt3	9.065228741	8.722677533	8.972171815	9.318555001	7.740252205	7.274877214	7.497183973	7.044411555	8.327636784	9.135562982	8.663761942	8.770151174
Aktip	8.103364106	8.200655943	8.026997677	8.040559696	8.149972573	8.220065479	8.322501975	7.847982123	7.990007701	7.822622959	7.893844728	8.354802561
Alad	6.749153373	6.607751631	6.670226581	6.804505664	6.964818706	6.774777513	6.950989793	6.757627947	6.758486246	7.089929181	6.851241951	6.910324714
Alas1	11.43108446	11.54208689	11.42702646	11.62405122	10.9188577	10.80736029	11.20245569	10.69941069	11.32007861	11.32057358	11.04053861	11.34655885
Alas2	5.774733707	5.612374564	5.780684526	5.489486164	5.908163524	5.850848102	5.705099615	5.444872512	5.431722407	5.651396973	5.628835498	6.180260962
Alcam	12.16931425	11.95429275	12.10615557	12.28818333	10.99821984	11.02777812	11.20547518	10.83151804	12.15594912	12.34141233	12.01185246	12.20378183
Aldh16a1	9.697605039	9.745212271	9.762995281	9.770253441	9.993012774	10.13978732	9.908044606	10.17675045	9.817393888	9.623012105	9.836971814	9.561007806
Aldh18a1	7.82165271	8.56962393	8.416950486	8.480681229	8.482670212	8.657342495	8.520730494	8.984080897	9.34219709	8.419553588	8.708839033	8.181757887
Aldh1b1	7.351968143	7.477133854	7.113336537	7.071427374	7.548796095	8.186703835	8.049391649	8.37096501	7.660974232	6.897900781	7.399010283	7.119346085
Aldh1l1	8.66182333	8.938637202	8.706324489	8.674842237	9.238208892	9.36993334	9.248419947	9.198736951	8.697756837	8.289218517	8.643044623	8.724209872
Aldh1l2	5.014030726	5.90934935	5.611844879	5.344476781	6.279910958	6.176523845	6.146058939	6.135619523	5.950531612	5.1586001	5.486569478	5.764376991
Aldh2	12.85390288	12.68360203	12.7486096	12.8654207	12.06701347	12.03623436	12.05412377	11.91393819	12.455381	12.65646096	12.57356398	12.59693846
Aldh3a2	9.771182742	9.717285479	9.786271716	9.860672935	9.482962831	9.535851559	9.511642251	9.356044428	9.712110819	9.713119354	9.668342425	9.749539029
Aldh3b1	10.23250568	10.21971977	10.44039111	10.43446455	10.08951751	10.23179624	9.971969165	9.97986565	10.45912099	10.32962818	10.36878391	10.36681398
Aldh4a1	8.116457937	8.476617288	8.186906563	8.146798669	9.141761571	9.470060642	9.683795238	9.381813877	8.580336022	7.8918776	7.96785373	8.309942985
Aldh6a1	8.034725991	7.975493153	7.818808667	7.595784223	7.873731161	7.889558243	8.11327712	8.228020013	7.645663689	7.689069446	7.622035055	7.730316606
Aldh7a1	8.27099174	8.389399006	8.292563791	8.456173913	8.727449658	9.019364784	8.922854187	8.766869969	8.430194923	8.019872531	8.213218344	8.205592439
Aldh9a1	10.644882	10.68683227	10.68390362	10.77017264	10.80952361	10.93286162	10.83165821	10.72246125	10.76808417	10.60279589	10.70692794	10.72985588
Aldoa	13.67782709	13.67506184	13.66963661	13.72774277	14.00873159	14.23224404	14.32840435	14.25202506	14.0003304	13.77958319	13.68884811	13.70712124
Aldoart1	8.994460633	9.050102643	9.153095749	9.106767053	9.344976398	9.582721006	9.396244526	9.500839385	9.320032757	9.026646139	9.110129513	9.051863349
Aldoc	8.770433244	9.207618316	8.974788459	8.790033738	9.552589916	9.378516156	9.455909125	9.388829506	9.025263333	8.762152022	8.91758891	9.16942325
Alg1	8.278875577	8.253763573	8.449652292	8.588559742	8.467015459	8.488964361	8.380751559	8.1693852	8.337987484	8.341150587	8.25347467	8.325933579
Alg10b	9.687598125	9.807001062	9.713655973	9.863675621	10.01879396	10.10576529	10.08639495	9.898239973	10.01324473	9.806870466	9.919585891	9.957721225
Alg11	8.316623651	8.238268969	8.275961977	8.198623442	8.407794971	8.461721757	8.525950357	8.334072706	8.378513671	8.402941566	8.301019959	8.570236145
Alg12	7.423364639	7.371171648	7.340748437	7.415273519	7.284280104	7.432447412	7.410449235	7.251144865	7.348715174	7.252740857	7.305162245	7.389941533
Alg13	8.097532866	8.028317454	8.103198979	8.18054138	8.211896471	7.847840192	7.986961886	8.273378234	7.986628776	8.419900468	8.205897248	7.842138499
Alg14	6.520639551	6.475395989	6.832488839	6.7469666	6.709821018	6.437361945	6.554419907	6.264371074	6.747169024	7.06487166	6.590720847	6.966291919
Alg2	8.568665532	8.800921175	8.657505406	8.618647857	9.189385729	9.622610164	9.574482613	9.49639155	9.143940135	8.478460057	8.670003377	8.786951989
Alg3	7.248511876	7.250299053	7.293979586	7.497741771	7.515258607	7.71005538	7.812359586	7.551895874	7.644576711	7.447992762	7.302008022	7.358709549
Alg5	8.381814235	8.118176059	8.358204454	8.194356519	8.33918603	8.584886156	8.464569802	8.387822915	8.398508249	8.416446299	8.296734258	8.537329079
Alg6	7.567446782	7.577333922	7.662694903	7.42339407	7.808527322	7.727350926	7.495111936	8.121429758	7.637761048	7.709050305	7.855928313	7.468911324
Alg8	7.797732878	7.886367315	8.028688016	7.814334754	8.037850826	7.778958862	7.924895763	8.27281136	8.206509211	8.376766737	8.088509135	7.9549468
Alg9	8.699087376	8.893992435	8.786807845	8.825376473	8.956894765	9.039773309	8.93275039	8.851667492	8.982118744	8.704335141	8.91854265	8.961056921
Alkbh1	8.46308065	8.631304322	8.471870181	8.70453472	8.546069641	8.246110298	8.240968718	8.2944806	8.413157222	8.544892892	8.709468614	8.423292193
Alkbh3	8.326160099	8.231473423	8.235706152	8.186790849	8.538631282	8.4759787	8.634597996	8.654656882	8.243067773	8.400407032	8.237555006	8.266411424
Alkbh4	6.86677564	6.970196882	6.969848489	6.469328645	7.35705577	7.192066844	7.473449969	7.701280431	6.850542846	6.91211053	6.631075797	6.90376518
Alkbh5	11.49121689	11.38489368	11.41322919	11.56023587	11.44888155	11.63932791	11.43927057	11.31972777	11.30878121	11.22465807	11.39637989	11.36891601
Alkbh6	7.072916981	7.226825109	7.048401057	7.094015089	7.078903136	7.008527742	7.289056887	7.026937296	7.147193674	7.06366094	6.961555847	7.178061405
Alkbh7	6.828705954	6.690687838	6.954295703	6.524216457	6.880763131	7.068834271	6.755914713	6.867304393	6.667751332	6.617698308	6.667010001	6.985699566
Alkbh8	8.256488365	8.083583918	8.268319799	8.055655787	8.494695141	8.544458473	8.438214654	8.640882637	8.290199881	8.413340996	8.334848934	8.344844963
Alms1	7.968771316	8.092461936	8.17093036	8.167721015	7.69898991	7.1468377	7.085786679	7.835846047	8.004472544	8.432934134	8.415516731	7.668666708
Alox5	9.251849798	9.333143842	9.772171694	9.691879105	8.498284065	8.020256469	7.741264171	8.086673777	9.095443649	9.492177201	9.332141647	9.06702463
Alox5ap	10.21616215	10.3851214	10.61326488	10.29422146	9.382026864	8.726086749	8.949665705	9.07497732	10.10222344	10.5892043	10.13748186	10.33121367
Alpk1	9.194208564	9.110903925	9.262447129	9.374248717	8.435327578	8.106921459	8.006400424	7.976091485	8.656312088	9.068022846	9.017000677	8.935508028
Als2	8.776127843	8.625197426	8.914389208	9.076646148	8.328062661	8.072176618	8.007252129	8.077278032	8.669158278	9.075974738	8.851707445	8.619424603
Als2cl	9.29224666	9.453615901	9.511845307	9.442750359	8.600007631	7.903710537	7.870401281	8.223058425	8.844555732	9.379483586	9.354563435	9.07100124
Alyref	9.637500781	9.511234863	9.624446463	9.222697052	9.248529436	8.829044264	8.916327226	9.314422898	9.524522553	10.07027364	9.869779081	9.87343282
Amacr	7.400586185	7.864932534	7.366399374	6.903911303	8.50778127	8.975288413	9.290230916	9.143516486	7.92031589	6.988462398	7.172053055	7.781255556
Ambra1	10.24510544	10.05563995	10.20269046	10.36524639	9.960663975	9.987870184	9.837872702	9.742355842	10.02386323	10.1861225	10.18906948	10.12203041
Amd1	8.088764537	8.160000654	8.037227178	8.236491317	8.260864218	8.048994323	8.21148857	8.144949874	8.104243535	8.244877313	8.205156542	8.072431099
Amd2	5.478133614	5.649394521	5.707018801	5.917202473	5.697439235	5.641374701	5.390276635	5.486906774	6.047204206	5.932007833	6.125481619	5.818667808
Amdhd2	9.731781338	9.453410661	9.799216899	9.663816292	9.065549905	8.827661954	8.604183671	8.859935245	9.273336158	9.789594786	9.667266831	9.546915864
Amer1	7.757079366	7.531253378	7.763675627	7.627993176	7.571517564	7.677592236	7.388517997	7.496707596	7.626822625	7.74657394	7.803225929	7.830718782
Amfr	11.46437952	11.41765964	11.49084376	11.53332901	11.52311144	11.82314974	11.82005288	11.60461513	11.72806454	11.47474612	11.40465887	11.57761136
Amigo1	6.727632514	6.7189097	6.646150168	6.817854945	7.143245482	7.061583555	6.799373578	7.053201763	6.681396322	6.771781064	7.106750573	6.681217612
Amigo3	6.570344406	6.686983784	6.660424609	6.46613595	6.429484046	6.139119112	6.288243167	6.592843809	6.349707874	6.52343343	6.40086855	6.290556567
Ammecr1	8.056311003	8.009653214	7.999547337	8.162960367	8.183722559	8.292252956	8.279864454	8.115790725	8.341879923	8.280007315	8.302501693	8.303162393
Ammecr1l	9.210899363	9.425648971	9.166642967	9.342764516	9.518535166	9.70394659	9.78911355	9.430099184	9.333353462	8.933192431	9.107031475	9.289924291
Amn1	8.782335015	8.843736936	8.678301271	8.669400119	9.143824002	8.649630628	9.174655581	8.898674477	8.615252155	9.048043608	8.68845432	8.973336576
Amot	6.859387991	7.426993325	6.668549218	6.75504095	8.382262519	8.494786574	8.748543887	8.692709609	7.206447711	6.526318322	7.031005115	7.000347662
Amotl1	6.44678683	6.626090856	6.647823912	6.704043919	6.69752289	6.698099907	6.65017543	6.820227992	6.81395986	6.634078817	6.660270238	6.433997669
Ampd2	9.375608332	9.49368875	9.432985594	9.647063067	9.009910022	8.634213739	8.649718203	8.973860032	9.370388413	9.628004278	9.67320297	9.134983668
Ampd3	10.39951582	10.4001017	10.3147594	10.39070976	9.67537873	9.417701756	9.636608733	9.285619743	9.855950133	10.11304122	9.979476551	10.25451518
Amz1	8.605092851	8.389684003	8.639695836	8.976490405	7.647846208	7.990126373	7.832160317	7.583465001	8.741967675	8.615096358	8.523050582	8.434951328
Amz2	8.247107379	8.147618668	8.118746898	8.247410185	8.464991148	8.210574161	8.446032355	8.441285441	8.08008684	8.433992538	8.227406114	8.103489741
Anapc1	11.3635752	11.43186324	11.46864488	11.54533591	11.41323177	11.42246421	11.34054838	11.44096553	11.54147267	11.46395218	11.50908638	11.3319782
Anapc10	6.874340533	6.510351918	6.778985259	6.765238403	6.827761046	7.11737366	6.960564801	6.54290533	6.742137944	6.816513945	6.704689463	7.13609579
Anapc11	8.975298189	8.798725276	8.952490855	8.911182949	8.723420485	8.59815359	8.635648377	8.723492711	8.847001153	9.148840961	8.957580595	8.911044167
Anapc13	7.803443328	7.761678688	7.600093715	7.291335027	8.084535462	8.130222546	8.351551321	8.175265023	7.611420573	7.607498129	7.547754327	8.032799313
Anapc15	7.234252644	7.208600018	7.18000887	6.961855942	7.718748194	7.375205221	7.431302421	7.44286451	6.837328887	7.206524486	7.179018434	7.385609273
Anapc16	8.231981856	8.209733688	8.345181866	8.182752324	8.269730792	8.111836309	8.240029125	8.204364479	8.262275863	8.442418515	8.178777521	8.376871709
Anapc2	10.80275314	10.82717158	10.86269941	10.93540123	10.76953918	10.76095439	10.67511455	10.73262848	10.79700765	10.781174	10.83148601	10.70127026
Anapc4	9.324493645	9.464611162	9.328270071	9.344598576	9.193452817	9.140521349	9.245452614	9.290087482	9.429812942	9.342626893	9.374036718	9.313073346
Anapc5	10.85211871	10.98589659	11.19428855	11.01241644	10.68293533	10.13820418	10.20008156	10.69846512	11.14596224	11.55691551	11.28664617	10.97013472
Anapc7	9.19430478	9.192813525	9.173548865	9.214892065	9.425911337	9.479487803	9.333126812	9.677360834	9.292185782	9.240100572	9.405726222	9.020149001
Angel1	6.50689786	6.84674737	6.505715203	6.255567882	7.10983626	6.889083493	7.086465358	7.233837275	6.570693228	6.451596485	6.595246787	6.698022191
Angel2	9.28160593	9.192475094	9.186932688	9.28518878	9.372088903	9.420378308	9.474398231	9.495156595	9.201415743	9.242257174	9.193779657	9.074765201
Angpt2	7.02535699	7.051290908	7.164915282	7.341055373	7.245804671	7.184634572	7.290295293	7.193559852	7.455172731	7.490408912	7.271123818	7.191719167
Angptl2	8.180512709	8.141319478	8.135244497	8.439571408	7.333233835	7.197231058	7.596854231	7.29432586	8.306337537	8.481533546	8.087985353	8.086186814
Angptl3	7.029639127	6.836921099	7.090900722	6.337346789	6.300065174	6.201775367	6.097115133	7.034427797	6.813853608	7.104861443	6.955542054	6.771783324
Ank	11.57500666	11.98860657	11.50944361	11.49456602	12.61591638	13.20658272	13.51681465	13.02076048	12.29782692	11.29356067	11.4624917	11.97342346
Ank1	5.945816792	5.658303151	5.8741785	5.796745659	5.927127969	6.244844055	5.915868682	6.515458735	5.994024764	5.963822319	6.076922343	5.554765131
Ank2	8.199524921	8.926132898	8.064768264	8.260432616	9.662278365	10.36870385	10.64624574	10.13635537	9.084606496	7.651573035	8.235395772	8.549621792
Ankdd1a	6.411309101	6.258634432	6.059822557	6.171745812	5.590087938	5.493096973	6.014838551	5.855385045	5.904656471	6.154322106	5.831392403	5.878922653
Ankfy1	11.95347287	11.95187406	12.03365422	11.97872092	11.7831057	11.85622686	11.83694652	11.80117816	12.05476071	11.98323836	11.92073854	12.0114402
Ankhd1	11.26096819	11.1169983	11.19635152	11.43485525	11.25316463	11.26050472	11.26366724	11.14461152	11.14765513	11.28428493	11.20176918	11.08232118
Ankib1	10.03581177	9.911532315	9.972866272	10.17353144	9.929741792	10.09029299	10.03008373	9.720208556	10.02929016	9.993018416	9.991893725	10.10110373
Ankle1	6.456429037	6.601559219	6.839970924	6.500574807	6.43678335	5.778571146	5.774270213	6.449052927	6.515398236	7.028480258	6.794369487	6.458982889
Ankle2	10.04040785	9.999433321	9.951451826	9.977909161	10.04518601	10.06392378	10.09444675	10.14501652	9.906617208	9.928853959	9.946312487	9.869285382
Ankmy2	8.148657795	8.271380751	8.352451426	8.25941119	8.34082652	8.566733459	8.480568555	8.528895801	8.464650576	8.116020681	8.121114911	8.1658279
Ankra2	7.590952257	7.620220604	7.497514881	7.2916405	7.564887693	7.436644174	7.571419335	7.713802612	7.405874558	7.50484973	7.492780292	7.556271397
Ankrd10	9.116818418	9.243114771	9.047732494	8.842338835	9.613143163	9.860341921	9.592337336	10.01303829	9.017223825	8.643728714	9.107115577	8.891808282
Ankrd11	11.80234136	11.73996543	11.88151245	11.88725244	11.53316184	11.39076527	11.32208557	11.39749964	11.66107737	11.86584987	11.79298254	11.71182849
Ankrd12	10.02237144	9.671450127	9.88004952	9.925707877	9.336813566	9.365819328	9.409160376	9.4103678	9.591993186	9.913908737	9.661968297	9.615102515
Ankrd13a	11.82420331	11.83196577	11.85185284	11.94408487	11.8724099	12.15995406	12.06113246	11.95768449	11.98456391	11.68925731	11.76819184	11.77940777
Ankrd13b	9.179864882	9.676493939	9.04233047	9.122081061	10.43515575	10.82468442	11.01249211	11.02483738	9.828686197	8.942528475	9.388884249	9.296788387
Ankrd13c	10.18163333	10.15337015	10.2170564	10.28288971	10.2732711	10.30233118	10.25985664	10.1054806	10.28293286	10.28213597	10.26092425	10.34946698
Ankrd13d	7.327642545	7.032909711	7.223543579	6.764974246	6.341769299	6.390264768	6.341381741	6.586179713	6.691273089	6.937510453	6.795759612	7.009530973
Ankrd16	8.368812235	8.251524913	8.445716827	8.147651182	8.242638145	8.188248196	8.088482939	8.254573435	8.054406789	8.22608406	8.131657402	8.263632552
Ankrd17	12.13227367	12.31206464	12.12521302	12.22552052	12.24429704	12.31542969	12.32544983	12.19955316	12.22949745	11.97857382	12.15540531	12.18099448
Ankrd2	5.119936056	5.346533996	5.238072296	5.327632438	5.7559507	6.493747206	6.484230555	6.118869547	6.072725963	5.108331516	5.226309867	5.502110734
Ankrd24	7.445100959	7.628134601	7.306888911	7.123828834	8.180894962	8.144853305	8.125934793	8.277152873	7.075441522	6.928449537	7.268613739	7.300455736
Ankrd26	7.407483257	7.020602684	7.397858883	7.118460782	7.28357659	7.237994374	7.183558511	7.433211107	7.199001898	7.631464687	7.308644351	7.338389856
Ankrd27	8.748100222	8.551213872	8.783384884	8.741691773	8.307845006	8.211239197	8.137981998	8.212642309	8.585474141	8.8789663	8.720052488	8.687085288
Ankrd28	10.39016143	10.55409677	10.31250521	10.55591785	10.49895923	10.52191778	10.66521982	10.03714349	10.5976419	10.41074801	10.50903753	10.89370122
Ankrd33b	10.81539491	10.70788669	10.81374685	10.92994445	10.10397626	9.589543271	9.485487978	9.412758173	10.17972177	10.80166298	10.79985811	10.75639032
Ankrd39	6.293039663	6.224259237	6.241618613	5.836066364	5.724583124	5.518200719	5.686765286	5.924137694	5.859953906	6.135116737	5.949192794	6.117372635
Ankrd40	10.08473775	9.958685279	10.00336498	10.04106282	10.17100614	10.2935351	10.3837244	10.32467724	10.14089552	10.14441902	10.00955003	10.03089935
Ankrd44	10.55210073	10.27619439	10.46924209	10.63734662	9.766585765	9.7390931	9.622186353	9.603858273	10.10254745	10.40594645	10.3298055	10.18002905
Ankrd46	8.36090344	8.281399563	8.209569969	8.015817277	7.363292559	7.302152233	7.270862181	7.511191079	8.106983871	8.247628074	8.350747719	8.304171514
Ankrd49	7.591034854	7.697388058	7.595775374	7.663797033	7.813040727	7.770117744	7.892338492	7.858751344	7.819964506	7.756534285	7.735926221	7.70149171
Ankrd50	9.959119638	10.25643216	10.04742374	9.95237348	9.876387618	10.00400769	9.968660152	9.902422021	10.09458409	9.6696515	9.914007452	10.07529584
Ankrd52	10.83306873	10.83564236	10.76026143	10.91804094	10.95441098	11.1849633	11.12836829	11.0250457	10.82681461	10.59368867	10.72566461	10.67120768
Ankrd54	7.158735684	7.177966594	7.24476346	7.48536043	7.329624838	6.928994352	6.880961194	7.228318816	7.164862281	7.546261857	7.527498149	6.939543557
Ankrd6	5.34746916	5.34411213	5.212884319	5.368535681	6.009734162	6.649191271	6.465059035	6.503170401	5.591051735	4.954951656	5.270311703	5.076548976
Ankrd61	6.813991646	6.82765221	6.932122251	6.5219766	6.647153395	7.16062375	6.429252174	7.402074665	6.809597023	6.282466104	6.909367638	6.346690799
Ankrd63	5.946966476	5.637256474	5.514683981	5.837485211	5.972907975	5.968779806	6.115515477	5.600816743	5.357755233	5.671593403	5.647430225	5.83932773
Ankrd9	6.094993071	6.095819021	6.122896555	5.964146174	6.500411918	6.263695934	6.275216371	6.647784504	5.753228441	5.989118474	5.950520502	5.736702751
Anks1	9.904165848	9.729499657	9.956916543	10.02225989	9.383772896	9.405923485	9.146527262	9.156196128	9.383463739	9.535979342	9.567958678	9.49294646
Anks3	8.352278007	7.963686099	8.286679202	8.102997654	8.092289644	8.241113096	7.810260257	8.150077325	7.886305046	8.126073502	8.233933238	8.077797717
Anks6	6.716924729	6.883380616	6.484197889	6.327934605	7.384334543	7.865296182	8.142326205	7.976370062	6.901022965	6.25360544	6.375758143	6.697977571
Ankzf1	8.078707826	7.887796182	8.00478855	7.995750088	7.907331561	8.080123651	7.869767186	7.853983905	7.779410614	7.797530168	7.890894265	7.915716008
Anln	9.131789504	9.302088574	9.649568247	9.490813636	9.134373169	8.421765634	8.479687055	9.098421639	9.906258908	10.44856737	10.04316628	9.583186307
Ano10	9.285720139	9.34158431	9.114261215	9.323677024	9.501876171	9.817996863	9.899696205	9.525049972	9.342815171	8.970830309	9.116454062	9.281684486
Ano6	11.57342429	11.63077273	11.68866432	11.85733859	11.31694474	11.22177175	11.20281873	11.16670967	11.74529801	11.78312257	11.744184	11.61161879
Ano8	8.387741681	8.441017376	8.368773352	8.36157322	8.7036627	8.831565728	8.776362187	9.06810358	8.510555213	8.32937649	8.456824055	8.172282794
Anp32-ps	5.933685834	5.879504635	5.742540791	5.478845689	5.805058755	5.418626092	5.944115797	5.816076228	5.701290766	6.141904629	5.753378768	6.145113439
Anp32a	9.450490433	9.145420008	9.197618891	9.149367416	9.043226322	8.949394215	9.138187021	8.767353706	9.017684807	9.41658734	9.175595651	9.594680441
Anp32b	9.764118472	9.613100102	9.751784655	9.668828446	9.536077455	9.334288525	9.233860777	9.548281066	9.736873573	10.08968087	10.05142407	9.819959988
Anp32b-ps1	7.604956228	7.756853654	8.063217467	7.759975419	7.569753786	7.385279398	7.058571062	7.491054243	8.147525224	8.180102186	8.200446709	8.071205575
Anp32e	9.564836048	9.659271577	9.672805227	9.498480068	9.546196601	9.142547165	9.316690845	9.615642064	9.966183829	10.27539774	10.08772041	9.963094346
Anpep	13.29347775	12.93941632	12.88680925	13.36546156	12.06851023	12.37711224	12.50018327	11.72753189	12.73473099	12.78019041	12.70972646	13.00372553
Antxr1	5.644213405	5.804685114	5.493938889	5.101622026	6.48227307	6.650668272	6.632232565	6.820983907	5.395148894	5.066281983	5.395463915	5.599029436
Antxr2	12.13527403	12.3363179	12.03940344	12.08548358	13.14418184	13.41717875	13.71382946	13.38898269	12.57951337	12.10547259	12.10573633	12.38450297
Anxa1	13.62207871	13.71650396	13.75581821	13.60300309	13.41938618	13.39783976	13.63840229	13.52470803	14.08572957	14.01285075	13.73297398	13.99948334
Anxa11	8.833207588	8.750136701	8.914604218	8.74189472	8.639700253	8.870386388	8.872149886	8.834311294	8.921117946	8.773502698	8.607271683	8.817819773
Anxa11os	6.65879386	6.996084343	7.116662677	6.868602544	6.487804424	6.38392901	6.641268268	6.660420869	7.310147256	7.076732189	6.698814596	6.927722128
Anxa2	12.48637277	12.71278851	12.71134561	12.59776786	12.7333843	12.77636448	12.79844025	12.70812967	12.99699381	12.72759788	12.70696502	12.91085335
Anxa3	10.62855686	10.67062486	10.63728186	10.57003243	9.499099239	9.22837877	9.551336044	9.342167648	10.34462642	10.57327889	10.28366462	10.56008245
Anxa4	12.71046157	12.62831497	12.66564215	12.6663982	12.54260086	12.5844675	12.75173822	12.54569262	12.81985851	12.86013847	12.65554057	12.86083011
Anxa5	12.87639987	12.8200871	12.86266026	12.78916718	12.63138105	12.65572697	12.78530276	12.6997387	12.95597503	12.98794188	12.81579292	12.97485007
Anxa6	11.07484252	10.87055621	11.17285734	11.06248109	10.44382497	10.46427141	10.17135724	10.30768326	10.66657434	10.85041421	10.84102726	10.81507749
Anxa7	10.87529123	10.97425469	10.85078034	10.89159211	10.92134273	11.10750791	11.30573625	10.86736761	11.05728229	10.77215365	10.69739967	11.09495653
Anxa9	6.956193444	6.623598658	6.795149345	6.723340221	6.407289119	6.231589085	6.16047949	6.134488598	6.447609814	6.955904634	6.855463543	6.953263559
Aoah	10.67348088	10.64980887	10.82589648	10.60560617	9.710762179	9.021390473	9.233914601	9.294549528	9.953333895	10.66637761	10.27776588	10.43742126
Aoc2	5.947640993	6.343103186	6.026337428	5.808863556	5.952228079	5.677560857	5.913750706	6.166327141	5.877705651	5.756910679	5.837486589	5.802384025
Ap1ar	8.462501278	8.599648662	8.579896991	8.738761226	8.874310678	8.705829233	8.958642136	8.701918305	8.738021375	8.769355435	8.536294203	8.634153799
Ap1b1	11.55961999	11.27948968	11.40766619	11.55610435	11.10351073	11.06423149	10.91985679	10.99019896	10.95977203	11.27918159	11.29537977	11.07659945
Ap1g1	10.98098764	10.96710838	10.97625454	10.97679767	11.12413445	11.29927178	11.27133615	11.20676877	11.05888637	10.89762831	10.91641777	10.98044203
Ap1g2	9.34955446	9.493468775	9.384107087	9.426185719	9.783668263	9.903123469	9.788061382	9.97227841	9.464599723	9.201230202	9.425653977	9.199358318
Ap1m1	9.600625908	9.568974702	9.661651442	9.647222828	9.718788328	9.763850548	9.758160622	9.627625185	9.731209575	9.717798561	9.630811748	9.775775798
Ap1s1	10.12726786	10.22797047	10.33457681	10.48511467	10.38766689	10.5134272	10.58134349	10.27708021	10.71872259	10.49225967	10.31773704	10.47146246
Ap1s2	10.08338338	10.0407794	10.06216259	10.01453055	9.335230389	9.1266822	9.286392632	9.070082305	9.936247679	10.18739985	10.00630622	10.2702486
Ap1s3	6.48440138	7.217610384	6.872077194	6.75661346	7.480566961	7.248054682	7.490255822	7.678875672	7.576655934	7.075959209	7.179291259	7.106135144
Ap2a1	10.47057887	10.57071769	10.49810837	10.65846045	10.33684878	10.50227879	10.40978912	10.30443328	10.47076076	10.20519193	10.37029092	10.31529469
Ap2a2	11.13955219	10.93321814	11.21528475	11.03545148	10.8378022	10.85436694	10.56668163	10.82507516	10.70331985	10.89308917	10.89870786	10.8201476
Ap2b1	11.69321973	11.73771079	11.73311885	11.83056804	11.66100991	11.88123092	11.77778856	11.64988872	11.82846279	11.56375072	11.67178502	11.70223567
Ap2m1	9.821802581	9.809481101	9.805588218	9.858167523	9.775556809	9.722932557	9.820312752	9.671542965	9.866306173	9.931251905	9.837764593	9.933955075
Ap2s1	10.68655957	10.49055579	10.68365342	10.73596761	10.6180862	10.89302023	10.80906766	10.4985871	10.73606561	10.65713537	10.5479903	10.80615667
Ap3b1	11.18044255	11.04599211	11.13060153	11.19765292	10.98681282	11.11117972	11.12646693	10.91516602	11.11617683	11.12626037	11.02636373	11.17061326
Ap3d1	11.93080394	12.09684187	11.93542957	12.04504209	12.26312959	12.58055825	12.44319504	12.37766977	12.10405839	11.6205918	11.91936732	11.87528006
Ap3m1	9.441183891	9.37971822	9.487215628	9.447437701	9.541414924	9.566607954	9.643451237	9.555338281	9.663126529	9.699399169	9.515058479	9.642949362
Ap3m1-ps	7.939904565	7.764041183	7.894686547	7.731925625	7.935688872	7.926729387	8.085128994	8.133629821	8.078960419	8.263783286	7.974738315	8.08899841
Ap3m2	7.855798252	7.919926992	7.649521212	7.82046075	7.510874595	7.449558497	7.694402075	7.687049675	7.62003061	7.617217968	7.642780171	7.479193033
Ap3s1	8.693939696	8.537214729	8.573488289	8.477400031	8.498644821	8.560231948	8.681227749	8.382219009	8.699847917	8.794985756	8.637716396	9.032813394
Ap3s1-ps1	7.069412236	6.85955707	6.976568854	7.194762473	6.727379854	7.057447302	7.031837129	6.567195301	7.17316998	7.052957698	6.961556087	7.208004296
Ap3s1-ps2	6.627235627	6.562972695	6.659796622	6.331145462	6.439742177	6.571632611	6.490458757	6.602775849	6.567839366	6.500211864	6.484561791	6.700895859
Ap3s2	9.054350434	9.070129513	9.128322665	9.230661401	9.193547264	9.310839563	9.311097959	9.265601528	9.27439342	9.141322042	9.082870493	9.026028189
Ap4b1	6.029428659	6.287843833	5.778024168	6.007691008	6.307239586	5.908747205	6.461842299	6.142741863	5.801893364	5.941970569	5.898695141	5.988128738
Ap4e1	8.731723814	8.466140195	8.585935625	8.592992858	8.464206019	8.47972395	8.355557667	8.413165286	8.348324838	8.598390526	8.602761379	8.538096528
Ap4m1	7.650873606	7.696685757	7.678119764	7.796251712	7.492118323	7.216869244	7.011937096	6.96598456	7.184063713	7.413500642	7.636998784	7.564819371
Ap4s1	7.396375659	7.337937041	7.211146678	7.097461077	6.909202937	6.875068387	6.906605156	7.155826775	7.096186062	7.18875923	7.284012825	7.148476806
Ap5b1	8.781551188	8.586431496	8.815994309	8.792036203	8.249036194	8.625074659	8.240795113	8.371008477	8.580938658	8.400019885	8.554736619	8.44848136
Ap5m1	8.029898936	7.865855906	7.965349959	7.859401765	7.845920386	7.926952212	7.91522353	7.906102173	7.998291922	8.081303126	7.993537756	8.108607306
Ap5s1	8.403032628	8.293276798	8.204919458	8.427202411	8.728637682	9.034389197	8.992567616	8.950779911	8.503483344	8.307487658	8.437666579	8.257171332
Ap5z1	9.386217919	9.324413071	9.357803683	9.382734508	9.520882777	9.711914835	9.604838889	9.683463359	9.225224047	9.095996837	9.16968217	9.066126876
Apaf1	10.53387388	10.52546196	10.6594197	10.60633929	9.873556641	9.442959152	9.482292381	9.65923784	10.3202635	10.75927292	10.58598194	10.46211689
Apba1	7.696979369	7.603519034	7.624597998	7.888489525	6.613561687	6.445400452	6.667453333	6.132713819	6.989924577	7.251546147	7.008414302	7.279262288
Apba3	8.13628096	8.020739052	8.266381432	8.269022209	8.376356876	8.663475491	8.349953696	8.408764172	8.234179799	8.062603092	8.130482507	8.069031254
Apbb1	8.338887286	8.919827549	8.200777073	8.152487674	9.918562861	10.46976186	10.68176498	10.6505842	9.076696995	7.944557731	8.451605085	8.53107527
Apbb1ip	11.28540149	11.11694993	11.13622847	11.37068546	10.92452956	11.04707546	11.13711476	10.93571943	11.23099062	11.27689628	11.16757845	11.1345168
Apbb2	10.31854579	10.50117707	10.17706492	10.24549797	10.89739815	11.30627846	11.52147891	11.31914552	10.82124308	10.22973148	10.3386432	10.47254353
Apc	10.99760329	10.90526016	10.88409561	10.93002658	11.06157857	11.41966715	11.36057291	11.28687814	11.03934346	10.773598	10.8538568	10.88162061
Apeh	9.604927306	9.507986254	9.582902836	9.649820956	9.434762637	9.707306307	9.472815312	9.532107604	9.576375612	9.400772995	9.560347408	9.434136996
Apex1	6.451421653	6.502213187	6.553319566	6.428101787	6.279156702	6.130327486	5.818600372	6.35464833	6.507042611	6.605080293	6.865701029	6.454870849
Apex2	7.762185183	7.579907016	7.601552717	7.753038711	7.688950567	7.529366371	7.63448118	7.562452042	7.553875605	7.895737968	7.768977458	7.689520601
Aph1a	8.100644159	8.253718413	8.272541807	8.408052073	8.266700228	8.168722998	8.293954097	8.127281951	8.391794101	8.336697077	8.192642584	8.223804465
Aph1b	8.130291304	8.230248188	7.982020509	8.069898173	8.264140288	8.699717524	8.846221995	8.607895146	8.40344626	7.86791214	7.969635348	8.120084533
Aph1c	9.941812331	9.709315951	9.796973901	9.757378077	8.810268415	8.545254627	8.726368006	8.692108604	9.301367716	9.798877884	9.530106555	9.603961781
Api5	10.98549626	11.025314	10.9937848	11.1468823	10.95554227	10.87517459	10.90834046	10.76178489	11.08015186	11.12070179	11.11906513	11.11252319
Apip	7.62145721	7.630714176	7.64424544	7.236659728	7.64168295	7.631041958	7.526419662	7.813573666	7.465311696	7.466695722	7.557786753	7.678218461
Aplf	6.795255254	6.639030379	6.946238162	6.653477281	6.786414593	6.80093628	6.757307595	6.680916278	6.974534558	7.116237746	6.852658647	7.221810846
Aplp1	6.324034288	6.106360281	5.86534172	5.933846079	5.973970997	6.197161084	6.050417987	6.291589035	5.652253195	5.646737115	6.034498774	5.724823366
Aplp2	12.93329848	12.66813999	12.74428287	12.84544552	12.50987933	12.68311549	12.74043705	12.36403665	12.64229576	12.73421809	12.60075365	12.87599141
Apmap	8.765916423	8.625950286	8.812912685	8.804861831	8.698627421	8.610492963	8.687330671	8.694142586	8.891803705	9.119904301	8.856104194	8.857343133
Apoa1bp	8.578756546	8.605779367	8.641768029	8.529108092	8.905829773	8.94846826	9.023377734	8.975287672	8.714743117	8.64508181	8.534183673	8.694933672
Apobec1	11.98692423	11.85178847	12.02947441	11.88064006	10.8089867	10.23654239	10.44933661	10.73211524	11.65184894	12.359429	11.96894885	11.83500456
Apobec3	10.39696905	10.13831637	10.27364982	10.14228181	9.807833864	8.929208473	9.112043993	9.481239969	9.589349394	10.72662747	10.40845849	10.17063052
Apobr	10.02913193	9.91949716	9.835373761	9.919069319	9.886458032	10.22174573	10.30613081	10.0124239	9.970971151	9.745318232	9.745056542	9.955067894
Apoe	11.95428029	11.09448379	11.32351433	11.62343852	10.49371939	9.616828612	10.61007003	10.27939872	10.37426871	12.11095598	10.88868402	10.91943116
Apoo-ps	7.30260184	7.536812933	7.244422885	7.084161545	8.325172941	8.541167432	8.714991021	8.602210305	7.746064389	7.295858805	7.414425264	7.68746732
Apool	7.481875947	7.599468737	7.513188126	7.48013484	7.82349992	7.891188689	7.718826095	7.626077465	7.556843975	7.371562417	7.630205621	7.756007537
Apopt1	7.37794985	7.279923727	7.442678129	6.987490758	7.333408108	7.274253657	7.393645257	7.889861878	7.484601736	7.641782312	7.359636309	7.318607059
App	13.54185144	13.4675463	13.58911942	13.59287945	12.52881374	12.23455345	12.30378624	12.29835033	13.25679886	13.62536429	13.43455838	13.43623427
Appbp2	9.821596347	9.827159781	9.908846303	9.890646128	9.871468362	9.893091212	9.768006293	9.839063999	9.932925782	9.905739498	9.949137895	9.896280364
Appl1	10.06696364	10.07961337	10.05611594	10.01137606	9.773777097	9.682458286	9.757184498	9.579612256	10.13080412	10.20947321	10.15824442	10.38055655
Appl2	10.26883268	9.938757923	10.2762643	10.23710768	10.03117175	10.21399022	9.893306896	9.895904488	9.854070557	10.00132684	9.984503785	10.02106281
Aprt	9.375736417	9.366405443	9.467126199	9.577180973	9.312747086	9.531412096	9.615218552	9.486135269	9.94945773	9.740123694	9.555596482	9.574624992
Aptx	7.837164679	7.790998983	7.907219847	7.806831773	7.914715738	8.014780867	7.905000464	7.857335247	7.820177822	7.766278389	7.759837928	7.907891219
Aqp9	4.7327041	6.138540569	5.528867574	5.679670611	5.289799946	5.207200244	5.371695462	5.441183368	6.619935814	5.296699046	5.741876823	5.52158588
Aqr	10.2104578	10.21538538	10.27822602	10.26970579	10.13359234	10.15452766	10.13297086	10.15890558	10.34453756	10.31867466	10.27739082	10.25997634
Araf	9.639875168	9.539914891	9.7774043	9.672437837	9.550356681	9.604078339	9.497336193	9.510032273	9.552634531	9.59887315	9.468125887	9.56039627
Arap1	12.55920107	12.56609776	12.61005317	12.67239853	12.23800915	12.32826916	12.12171703	12.20395345	12.41065706	12.31350036	12.47609708	12.3315153
Arap2	9.060456354	9.326063426	8.948634769	8.767298912	9.991441926	10.28825747	10.59362089	10.50175297	9.500047301	8.937624688	9.009689922	9.282893696
Arap3	10.27353669	10.36006467	10.29043624	10.23611169	10.66616542	11.07938996	10.9791008	10.87413205	10.39535748	9.895604957	10.06552254	10.22481585
Arc	6.887932923	6.55000273	6.394186053	6.893194233	6.540381426	6.331802272	6.018391313	5.276946063	5.454954186	6.001463532	6.470691169	6.713128239
Arcn1	11.44484455	11.58337231	11.39625897	11.53325686	11.69095005	11.88861135	11.9452534	11.76197542	11.83235851	11.49616945	11.62664074	11.67292083
Arel1	10.35416416	10.36788317	10.33731815	10.28824654	10.56715379	10.62375585	10.69608941	10.62929626	10.24944422	10.17912316	10.13735462	10.25321938
Arf1	12.23523669	12.33543536	12.32723307	12.23951513	12.67055557	12.89348724	12.90384071	12.82257062	12.66258123	12.33945088	12.33729971	12.50628773
Arf2	9.763047431	9.694769943	9.758413025	9.794742756	9.357942919	9.14726449	9.192203035	9.111109283	9.650522469	9.929478386	9.820896759	9.86566078
Arf3	11.8591161	11.8467151	11.83991403	11.86179169	11.81146453	11.98353019	12.07920503	11.80253676	11.86099197	11.70132731	11.61245354	11.86724416
Arf4	10.89645054	10.76320466	10.67080704	10.90489434	10.95052432	11.18799416	11.17613094	10.56179771	10.75296885	10.6487449	10.75300574	11.13325167
Arf5	9.994668018	9.95628489	10.18194375	10.02721644	10.20937822	10.34561613	10.2408728	10.05122254	10.0972647	9.999409912	9.878494386	10.22287196
Arf6	11.67779334	11.62946544	11.67513076	11.70321245	11.49847968	11.49707521	11.5320667	11.41856176	11.83513219	11.88486456	11.80420776	11.889631
Arfgap1	9.705415604	9.70056324	9.684736127	9.764782487	9.601795784	9.547965679	9.520218497	9.624855486	9.577942741	9.636625209	9.680199505	9.495516155
Arfgap2	9.234688263	9.289692952	9.281240483	9.210308853	9.374017418	9.244275405	9.206726797	9.405277657	9.212914932	9.287652255	9.333653333	9.206034103
Arfgap3	8.968711476	8.776523976	8.975909538	9.000714853	8.43444076	8.558536987	8.434771656	8.283280272	8.794472378	8.862563651	8.78694342	8.913629489
Arfgef1	11.02456033	10.90402495	10.92829484	11.06420213	10.6115581	10.55305621	10.703546	10.5360829	10.87793096	11.05696823	10.88220855	10.91376437
Arfgef2	11.65003589	11.67462547	11.59206339	11.74028457	11.96726677	12.34681414	12.17773445	12.00294634	11.74802961	11.34389267	11.59553443	11.62210137
Arfgef3	9.433541105	10.01514503	9.66934076	9.539242834	10.25744082	10.58461955	10.46029804	10.62930489	10.25591749	9.347134842	9.817260623	9.778351697
Arfip1	6.86055922	6.8117723	6.765677576	7.052186052	6.763363404	6.786229316	6.92613456	6.40277623	6.903647933	6.929568942	6.835758421	7.072608276
Arfip2	8.518925153	8.471837858	8.466388674	8.429529184	8.627323515	8.623490343	8.692626667	8.728346547	8.469284998	8.520205466	8.456518326	8.457657936
Arfrp1	8.358105502	8.359204516	8.248804598	8.2963486	8.377134716	7.921255644	8.103368041	8.358291011	8.015058939	8.469838997	8.398126518	8.095659547
Arglu1	9.481676154	9.270817863	9.276689842	9.363816242	9.564858165	9.303505341	9.349843655	9.435707038	9.028215542	9.500426657	9.448216364	9.275226581
Arhgap1	10.04994064	10.06840918	10.10509238	10.07117358	9.913810374	9.843867987	9.838099578	9.876129056	9.981841675	10.03331552	10.00240073	9.998290053
Arhgap10	11.00435012	11.1586901	11.06037636	11.03105031	11.43319274	11.68436829	11.66713958	11.56121931	11.31687978	10.91136425	11.0269067	11.16215302
Arhgap11a	9.973822184	9.856921756	9.929384587	9.73021076	10.09847204	9.971378969	9.964442432	10.46672831	10.00806282	10.25205632	10.18653003	9.883417976
Arhgap12	9.941282334	9.506480984	9.922865909	9.837264094	9.596469878	9.5862142	9.484501454	9.682041303	9.771646965	10.21670399	9.902031814	9.79009378
Arhgap15	9.083995123	9.039125606	9.299986091	9.022654014	8.236204083	7.536605308	7.622974083	8.12328547	8.805134643	9.549602936	9.202373675	8.979394365
Arhgap17	10.8443143	10.62795782	10.78762344	10.92107988	10.22352789	10.29163563	10.14967647	10.00557901	10.39942599	10.54767474	10.52996827	10.5406093
Arhgap18	10.83543	10.5980487	10.67352681	10.74073604	10.91524931	11.03341357	11.09116165	10.80887967	10.65495965	10.77417669	10.6409505	10.85602324
Arhgap19	9.632319603	9.370183444	9.692789638	9.342094775	9.32432761	8.368751455	8.469910639	9.182795835	8.916448579	10.13416089	9.710395515	9.348205183
Arhgap21	10.4598204	10.57635373	10.50590675	10.48294971	10.60299299	10.60025641	10.58546446	10.5987882	10.55637794	10.44258119	10.52782012	10.53745343
Arhgap22	8.691718694	8.807922477	9.131042227	9.272267651	7.859317087	7.747358938	7.411030686	7.208310719	8.869861209	8.865615576	8.878824078	8.94031862
Arhgap23	9.443880182	9.229918485	9.335130346	9.37065154	9.317195231	9.651805895	9.406418055	9.317466295	9.086083261	8.965434294	9.105610273	9.159040838
Arhgap24	8.074094866	8.18945481	8.431579449	8.57380981	6.992662563	6.967095505	6.960580512	6.669880494	8.604814822	8.515021936	8.27941229	8.427881946
Arhgap25	9.999047102	9.736738039	9.896666638	9.915635011	9.223617138	9.231862414	9.223891488	9.471158076	9.780251464	10.03431525	9.882357578	9.616122617
Arhgap26	7.881645075	7.939138332	8.061097666	8.188094462	7.201176025	7.086488736	6.621376371	6.716778134	7.655753597	7.712947628	8.05610066	7.833702102
Arhgap27	8.755129369	8.865075458	8.763533551	8.76320447	9.193252517	9.348756213	9.243987461	9.328669361	8.710375038	8.444925254	8.651235912	8.566883093
Arhgap27os3	6.026966513	6.495227237	6.039055442	6.064331757	6.230345625	6.304071931	6.322218808	6.332114274	6.004115576	5.462128545	5.900153463	5.864981683
Arhgap28	5.911130819	6.126348886	5.900128741	6.057499082	6.779103044	7.058437226	6.984732616	7.047698209	6.239426069	5.74487382	6.044798574	5.824462641
Arhgap29	7.034417827	7.582574363	6.876479183	6.788210275	8.406051818	8.700473891	8.732514697	8.700545431	7.338087708	6.495509099	7.169563473	7.289801648
Arhgap30	11.60925036	11.47744103	11.6771264	11.65184642	10.72265916	10.24701333	10.39172291	10.54709475	11.25466984	11.862125	11.51773005	11.38763819
Arhgap31	12.14716522	12.19513036	12.00854071	12.26353351	12.37502239	12.84299927	12.78942622	12.28775641	12.13599891	11.62005689	11.86021959	12.1068966
Arhgap33	6.211988265	6.201588783	6.609252589	6.696663392	6.04187198	5.350363199	5.328102239	5.70308222	5.997582817	6.699491079	6.314088234	5.851697449
Arhgap35	9.05681119	9.160803396	9.207462841	9.258456149	9.52476585	9.518518226	9.574803092	9.470032589	9.214056242	9.11631166	9.013367349	9.067144545
Arhgap39	8.93163852	8.779104527	8.993655228	8.870996778	8.926687604	8.992518564	8.784879404	9.058875466	8.656853014	8.743556046	8.736644506	8.585306894
Arhgap4	9.84494033	9.883627033	10.10462712	10.03419357	9.832701598	9.646414305	9.432078895	9.569331367	9.672725838	9.820326429	9.813661752	9.746842833
Arhgap5	9.778280093	9.736193025	9.720325041	9.716079081	9.966543212	9.869137956	10.04698595	10.0700327	9.8807475	10.02023982	9.858259815	9.839459022
Arhgap6	8.817628343	8.533574696	8.715628753	8.807464199	7.91010053	8.06021745	8.131501544	7.976942175	8.697108965	8.831045693	8.577707542	8.640431465
Arhgap9	10.12671047	9.946786325	10.12290602	10.2107255	9.566236219	9.58917961	9.506046343	9.403412915	9.893656911	10.05063766	9.957651238	9.972465186
Arhgdia	13.01461223	12.99338208	13.11865275	13.30151748	12.89103037	12.91741452	12.88439989	12.83095136	13.19485463	13.18970064	13.09744459	12.96802839
Arhgdib	11.64006277	11.58925116	11.70822045	11.69031124	11.10633794	11.12161701	11.22835628	11.11207823	11.78600752	11.82154006	11.59583149	11.73001876
Arhgef1	11.70994501	11.61290603	11.75056333	11.86827134	11.55981158	11.74176237	11.48421963	11.35160252	11.50391833	11.41900652	11.53889197	11.55380106
Arhgef10	6.145316192	6.233038584	5.932206469	6.184559084	5.953241839	5.920815163	5.909824332	5.792883341	5.882573609	5.827277893	6.139100839	6.003689215
Arhgef10l	8.4124589	8.208934712	8.754095338	8.644174896	7.972944704	7.144024789	7.282379843	7.767991202	8.011021759	9.043465862	8.359950182	7.984259265
Arhgef11	10.13257652	10.08686838	10.2225267	10.21512683	10.18199985	10.25005783	10.19034293	10.17957971	10.11139169	10.08904184	10.01309843	10.03126152
Arhgef12	10.81508823	10.95455053	10.65870073	10.80439908	11.27226619	11.68638036	11.87050223	11.33209751	10.97306939	10.41949293	10.53122086	10.92392722
Arhgef18	7.398950624	7.100669195	7.515519179	7.47855834	7.186130999	7.246562177	6.952695859	7.384070552	7.205740062	7.443590312	7.322606647	6.928192793
Arhgef2	11.94957183	11.90975928	11.8954967	12.00817624	11.8768927	11.90852095	11.81209487	11.9392131	11.75862437	11.76680866	11.87749732	11.63769955
Arhgef28	5.669993915	6.048008471	5.72774398	5.867176403	6.575584463	6.765121995	7.345683899	6.91338957	6.38554817	5.817996082	5.557698669	5.850560575
Arhgef3	9.493965329	9.608398752	9.67376906	9.865995595	8.482618767	7.980071023	8.046040227	7.995691302	9.207808738	9.595923059	9.464583547	9.322705936
Arhgef39	6.46843966	6.509322848	6.765150056	6.79071273	6.60167189	5.726288494	5.724822587	6.162608562	6.483229993	7.317730201	7.063368901	6.600020252
Arhgef4	6.758376282	6.776809571	6.671827086	6.874092278	6.311662167	6.16621581	6.128526109	5.987217042	6.372505766	6.499518834	6.64219102	6.581234896
Arhgef40	6.730155802	6.910922269	6.767433015	6.556213972	5.986238734	5.806020816	5.485626544	6.217261576	6.659107879	6.658559329	7.122442856	6.602026866
Arhgef6	11.26545006	11.27780912	11.28366675	11.32828987	11.2126482	10.88875647	10.91910006	10.99689388	11.15398572	11.46551839	11.42931716	11.30690023
Arhgef7	11.77349402	11.90156371	11.94518841	11.96127195	12.1000261	12.37314921	12.22799773	12.19898599	12.05235671	11.65116391	11.75269069	11.76561889
Arid1a	11.54346471	11.49421938	11.5351012	11.57196822	11.31795147	11.36008496	11.09693791	11.28428509	11.3124657	11.31957754	11.54184277	11.31762857
Arid1b	11.13604132	11.02711732	11.12386201	11.17199439	10.77541826	10.83526807	10.6907771	10.75403662	10.93805846	10.98713265	11.03487893	10.92348702
Arid2	10.43896878	10.39393965	10.4096001	10.55974673	10.71553889	10.86704611	10.6965504	10.72169263	10.43354207	10.32706397	10.48189923	10.30661038
Arid3a	9.096106251	8.873828021	8.903696519	8.963877692	9.041941467	9.58458332	9.377795169	9.268046397	8.878701428	8.558337805	8.735257457	8.784825057
Arid3b	7.625577536	7.467820395	7.249904586	7.324422991	7.086484236	7.472415216	7.684444361	7.27246445	7.135700518	6.907526678	6.913413342	7.250874848
Arid4a	9.975240724	9.741095009	9.726595439	9.534769127	9.670126838	9.742801977	9.799910433	9.878851003	9.495951112	9.657421688	9.614812802	9.727698544
Arid4b	10.02844254	10.0030884	9.879724985	9.890243253	9.683002804	9.787474615	9.700293727	9.503854188	9.636915784	9.557798109	9.768342413	9.954263684
Arid5a	9.636313627	9.381856726	9.777153125	9.713555317	8.963146693	8.80917829	8.284871312	8.550436313	9.077740477	9.486165781	9.61517636	9.413209167
Arid5b	10.00694687	9.75772435	9.799051194	9.786296697	9.432430912	9.888035941	9.502000484	9.311635449	9.451525597	9.245143087	9.589851699	9.792971232
Arih1	11.6148819	11.74124399	11.54829451	11.70355234	11.84521788	11.94201722	12.02036886	11.74501395	11.70870193	11.48554049	11.60013833	11.72023541
Arih2	10.03193742	9.960399243	9.894640434	10.13061296	9.999691702	10.11262703	9.911307571	9.985803773	9.817368329	9.775971183	10.04304945	9.732580715
Arl1	9.984968221	9.936586207	9.856193879	9.902397645	9.97121105	10.03153404	10.13812107	9.831718728	9.982811747	9.970870773	9.944676074	10.20487464
Arl10	6.72925001	6.595667873	6.685951149	6.487779478	5.799144159	5.659958489	5.764195212	5.585995953	6.25235123	6.525119037	6.330599038	6.706969969
Arl11	9.493327821	9.262478219	9.347504542	9.376252252	9.013440174	9.317112198	9.429454842	9.293835316	9.50171899	9.428896568	9.231527601	9.338399417
Arl13b	7.396182072	7.204670408	7.254424877	7.49157791	6.627083558	6.553659779	6.776838809	6.45077507	7.176798963	7.441734407	7.168800907	7.257711613
Arl14ep	8.42530257	8.419761087	8.422548829	8.524013688	8.361677217	8.449832101	8.410328719	8.384106596	8.568579921	8.48596652	8.52268216	8.447439425
Arl15	7.870401135	7.654574492	7.510183992	7.77899853	7.511498385	7.572154235	7.673323092	7.604587724	7.452317195	7.607487988	7.650709631	7.450630461
Arl16	6.430780094	6.452686204	6.284481729	6.154989694	6.181935331	6.123591499	6.348292826	6.454441367	6.338404212	6.374841934	6.318345081	6.341688575
Arl2	7.403482525	7.072943352	7.498559325	7.466998956	7.396287779	7.533717363	7.493698397	7.3644165	7.337106589	7.530216178	7.144619171	7.305461436
Arl2bp	8.576015053	8.699204348	8.358986724	8.741395168	8.448799759	8.179604776	8.449515179	8.276871705	8.353728286	8.499733974	8.570041195	8.360276225
Arl3	6.338659387	6.06660098	5.79899306	6.120380984	5.643544958	5.557017358	5.997636629	5.278072264	5.621348549	5.979934555	5.806923204	6.205099647
Arl4a	7.773422848	7.812374052	7.577924841	7.447216498	8.072056346	8.10020478	8.26773146	8.222912881	7.73327057	7.666170932	7.733093463	7.908620386
Arl4c	11.5294871	11.54612893	11.49108515	11.40984121	10.17147407	9.591035704	9.673539069	9.97790806	10.88111383	11.44491036	11.41745077	11.19432572
Arl4d	6.464407481	6.300861208	6.355216388	6.023358971	7.144852562	7.335681588	7.019634269	7.391847539	6.17054864	6.143265888	6.404958025	6.364602173
Arl5a	10.71567113	10.66613682	10.67192678	10.70267955	10.51515574	10.48398134	10.56811587	10.3389645	10.69524621	10.77595493	10.68603044	10.88442903
Arl5b	10.07592776	10.06091972	9.992172795	10.42786431	9.937018071	9.862487275	9.795506408	9.27209568	9.777653533	9.867192365	10.00292016	10.09063937
Arl5c	8.691733478	8.353287965	8.298568414	8.599742913	7.750187317	7.682871151	7.466500133	7.510892954	7.547571513	7.953333192	8.22442376	7.87885644
Arl6	5.660622637	5.650463898	5.690610286	5.505137456	5.549237959	5.273630445	5.650462909	5.599542611	5.952104108	6.237870362	5.82089151	6.057284638
Arl6ip1	11.40433524	11.22298206	11.44678531	11.45488664	11.14480044	10.95950952	11.06125424	11.02522965	11.42418043	11.79082454	11.46527657	11.49319983
Arl6ip4	7.85640483	7.803330186	7.944958647	7.828267212	8.058764433	7.823532167	7.814853023	7.823344799	7.843918434	8.132225344	7.999276028	8.107475686
Arl6ip5	10.79456861	10.79591719	10.79272603	10.75765072	10.94569422	11.08119054	11.14679974	10.88124884	10.89725031	10.76040542	10.69798738	10.99861359
Arl6ip6	8.040206532	8.131072376	8.224117672	7.876403625	8.264823536	8.048144292	7.960831361	8.451098759	8.144500084	8.270313483	8.264581119	8.122027768
Arl8a	10.72808323	10.59063779	10.65886826	10.85158071	10.26260662	10.16291043	10.24368254	9.981063179	10.51205666	10.74919829	10.60019571	10.67010261
Arl8b	12.07516189	12.19489213	12.05333346	12.19587186	12.47038534	12.71118075	12.76642353	12.47992599	12.49237252	12.13184688	12.21816276	12.36212191
Armc1	9.179722648	9.212105408	9.21347397	9.387743259	9.465474097	9.609095623	9.673834979	9.58836469	9.612023826	9.436019541	9.369911623	9.281112622
Armc10	8.548742363	8.674985907	8.451462823	8.462727453	8.321851218	8.045131719	8.322588076	8.158364496	8.452357538	8.602833494	8.548900221	8.701859171
Armc5	8.888119348	8.830500069	8.925159501	9.131243696	8.768899563	8.881346743	8.551245129	8.545588141	8.809529053	8.754701152	8.990143335	8.789716127
Armc6	6.638467601	6.605439853	7.034448451	6.956658276	7.067373474	7.370297223	6.869146215	7.231210184	7.221122002	6.951226	7.02336841	6.739094616
Armc7	7.598997975	7.545895983	7.616944962	7.580496935	7.551888319	7.436012552	7.49512241	7.470519691	7.491534668	7.660512427	7.53035359	7.591404336
Armc8	9.089421396	9.0292943	9.185650304	9.148984121	9.200150627	9.181043477	9.217644775	9.169409377	9.114640463	9.193874708	9.000917406	9.085818987
Armc9	6.898190953	6.7353806	6.765349424	6.953981665	6.781337755	6.787687376	6.85398424	6.855752424	6.809066197	6.965526928	6.86926124	6.678860816
Armcx3	7.529837975	7.179774685	7.428789503	7.39003993	7.135170755	7.045329737	7.132089076	6.983342555	7.28356892	7.723473228	7.387699072	7.575195165
Armcx5	7.167599698	6.997951666	7.093802704	6.841265912	6.636774374	6.456718621	6.426813262	6.557195979	6.591547829	6.941251615	6.875305936	6.99746001
Armt1	7.850293509	7.88893113	7.824196964	7.852239797	8.236955485	8.024996105	8.169467888	8.374716302	7.825367876	7.998689636	7.918952018	7.685660771
Arnt	10.40052422	10.45442368	10.27105813	10.27695313	10.26795593	10.32056362	10.30682437	10.38125843	10.22546858	10.11896143	10.31606622	10.23573716
Arntl	7.606137627	7.519519326	7.568115424	7.507127659	7.421968986	7.444990526	7.19153936	7.369882725	7.343933507	7.407530268	7.612385336	7.495029736
Arntl2	5.346406814	5.628614758	5.418195082	5.203818118	6.040652599	5.784172271	6.041320267	5.554144508	5.422952791	5.397225175	5.350496854	6.052049577
Arpc1a	9.450496505	9.369126766	9.345471247	9.419873334	9.471449452	9.608292856	9.472400941	9.516215629	9.341836489	9.286362824	9.445910258	9.327693483
Arpc1b	13.19972448	13.16030568	13.28354323	13.21977367	13.09886936	13.21462585	13.14245017	13.23654831	13.3667178	13.29038011	13.23931825	13.20898966
Arpc2	12.82536887	12.90732337	13.01275111	13.01218116	12.93899192	13.10721965	13.04823856	12.95767031	13.24845169	12.99826946	12.95182282	13.04296101
Arpc3	11.18111215	10.9524401	10.98339813	10.94202051	10.97515077	11.05532691	11.23300813	10.84934527	10.86637585	11.01487175	10.80623251	11.23127299
Arpc4	11.44414237	11.44473053	11.52790398	11.55957341	11.55645814	11.75935467	11.64183148	11.65664527	11.72854773	11.52506304	11.55941279	11.51292955
Arpc5	12.11735668	12.06011173	12.13056514	12.03411875	11.92962941	12.02469359	12.07833073	11.93216039	12.30394823	12.266129	12.14203846	12.38465518
Arpc5l	8.196902553	8.122701054	8.145956793	8.023476333	7.948863592	8.023568879	8.084910228	8.233249425	8.338434743	8.337930954	8.253333866	8.227475129
Arpin	8.088205587	8.452548479	8.204128805	8.025988489	9.258031341	9.416689699	9.659589623	9.493360472	8.578440285	8.055439035	8.060958785	8.405328251
Arpp19	8.958295011	8.986949941	8.634558978	8.808875806	9.405526887	9.465562043	9.722069304	9.261847955	8.939607939	8.850917854	8.946801556	9.232706078
Arrb1	12.09701644	12.02695775	12.15570197	12.12003388	11.7508926	11.73217814	11.52918104	11.75073685	11.79662058	11.88539372	11.95964661	11.77375889
Arrb2	11.20728148	11.08134703	11.27714513	11.28284688	10.41874343	9.933621159	9.983894651	10.10763339	10.65070078	11.2617575	11.01568591	10.88624542
Arrdc1	9.059662536	8.92307258	9.010750732	9.243617641	8.715827252	8.603672505	8.475835298	8.414897506	8.593034722	8.841779425	8.881938479	8.710009362
Arrdc2	9.153993999	9.048832167	8.863615024	8.917748403	9.764315516	10.02617201	9.484308424	9.765605839	8.656869414	8.500174749	9.227255481	8.891824687
Arrdc3	9.374724858	9.464857659	9.217894784	9.094868866	9.511210998	9.749615451	9.855696642	10.19768498	9.546522278	9.217985025	9.358866708	9.139904285
Arrdc4	9.056462472	8.993975527	9.068976755	9.252671269	8.513182482	8.671594079	8.606428055	7.928429466	8.693549099	8.597624448	8.587789243	9.082093318
Arsa	9.319228791	9.355594052	9.443239757	9.472955769	10.03179124	10.07491719	10.04561331	9.90657239	9.451219713	9.371728503	9.313386672	9.422711583
Arsb	11.32743585	11.86346481	11.13847937	10.84580363	12.51565655	13.15903374	13.68269877	13.17019005	12.12805344	10.94864729	11.1499677	11.95515217
Arsg	6.965074676	7.220335901	7.01076433	6.922268738	7.506616071	7.729775163	7.602053736	7.720385995	6.946642889	6.468222572	6.80551557	6.775678902
Arsk	8.08461555	7.909706608	7.934189725	7.834520065	7.613318204	7.828479806	7.725018967	7.645900169	7.90733259	7.86707993	7.946057652	8.124846111
Art2a-ps	8.512334981	8.369945245	8.761922914	8.755569759	7.870823238	7.485515421	7.198290737	7.617197807	8.305428228	8.833125781	8.728372797	8.315818882
Art2b	5.876848559	5.784244766	5.918048933	6.176880944	5.610618321	5.279209377	5.222162092	5.194331544	5.741198394	6.165211131	6.088454249	5.857452786
Art3	6.806296019	6.078905134	6.424588791	6.249106298	5.813368017	5.829111709	5.446768383	5.505552442	5.58592499	6.297572183	6.334231852	6.450930287
Arv1	6.384271281	6.728051171	6.341533739	6.315413709	6.471990495	6.20474592	6.413250098	6.688566758	6.57212827	6.495592955	6.673606209	6.424409578
Arvcf	7.076440632	7.387026016	7.048086954	6.608463239	7.888595516	8.211512885	8.289411593	8.59514008	7.297701522	6.664198768	6.925239123	7.059134351
As3mt	6.273124681	6.368353603	6.274235122	6.591894708	6.540070544	6.610985762	6.679736394	6.239006711	6.448040008	6.281895867	6.307263717	6.430333812
Asah1	11.83677896	11.76721014	11.7717589	11.69702181	11.77173858	11.85359775	11.93711943	11.77330886	11.84826967	11.83597932	11.74790888	11.98645653
Asah2	8.56836832	8.53205544	8.298543578	8.542088796	7.922633945	8.053910161	8.122268028	7.522692356	8.020915381	7.925952046	8.091106041	8.447136496
Asap1	11.91995826	11.93295958	11.95471625	12.02717602	11.64404451	11.43761495	11.41837476	11.51493128	11.73323925	11.92666749	11.92415102	11.75513473
Asap2	6.853745892	6.848468505	6.540360461	6.558472891	6.393089271	6.195410494	6.422010971	6.555780709	6.63384288	6.836799044	6.918306611	6.766424444
Asb1	8.018272393	7.813542247	7.89885124	7.901848519	7.967268112	8.185978349	8.146755052	8.148608618	7.961917371	7.947937281	7.901851583	7.897000739
Asb13	6.96061888	6.768434371	6.994105294	6.797946433	6.866199983	6.900881854	7.057374276	6.823169322	6.788382137	6.945884774	6.56372143	6.994085245
Asb2	6.652151042	6.675072205	6.52236333	6.850236006	6.170760989	5.356101139	5.25786678	5.806085	5.89205575	6.683794437	6.934737672	6.058646776
Asb3	7.604211018	7.539239672	7.718627966	7.724366149	7.36359285	7.316427259	7.388510795	7.291974331	7.624054232	7.736191168	7.484719338	7.57551762
Asb6	8.81363203	8.738781109	8.705380906	8.932287431	8.798030482	8.791254225	8.773374762	8.647358462	8.585861148	8.667488326	8.718767992	8.617877768
Asb7	8.203140124	7.976954836	8.185356651	8.278915407	8.101355329	8.401614222	8.17229876	8.073107005	8.228526214	8.15445261	8.175366257	8.180999256
Asb8	8.767841406	8.7020431	8.718548636	8.608694738	9.121054746	9.276347289	9.404096099	9.384625622	9.028236369	8.938742132	8.794487786	8.923812161
Ascc1	7.842738729	7.74706507	7.612421426	7.564844529	7.75288241	7.988403644	7.900329815	7.850135075	7.624477986	7.48463041	7.707347883	7.80511952
Ascc2	10.26611522	10.30505335	10.16927121	10.37545367	10.22666439	10.54008689	10.50783881	10.29943599	10.32626608	9.973905453	10.14193567	10.14415603
Ascc3	10.94077981	10.93543659	10.93502547	11.14712482	10.87388432	10.97363141	10.97842313	10.72405415	11.11801632	11.02361244	11.01923184	11.06150147
Asf1a	7.91962514	8.22132835	8.188449421	8.291105788	8.215608245	7.833786894	7.76430966	7.86623389	8.207655134	8.287773275	8.390129438	8.185548841
Asf1b	8.016430615	8.024010246	8.41109154	8.34102052	7.522383835	7.077541875	7.170224377	7.295456709	8.497671917	8.934934247	8.45517045	8.400009139
Ash1l	11.04235327	10.84679612	11.03904188	11.065919	11.03356283	11.02723949	10.99684242	11.05509432	10.88095481	11.0828353	10.92098661	10.83585759
Ash2l	9.495871223	9.386128472	9.519581447	9.421374273	9.210954602	9.178345898	9.075347675	9.157171283	9.469197989	9.611549444	9.581094692	9.597478257
Asic1	5.648251678	5.769524648	5.811508241	5.903977161	6.078619859	6.10042154	5.990005621	5.559124107	5.550792459	5.407717808	5.476150133	5.814562727
Asl	9.30567486	9.356404176	9.29931726	9.332359867	9.413428108	9.445055412	9.336281264	9.501078519	9.298763091	9.216406472	9.382267535	9.184427673
Asna1	9.753589748	9.69283361	9.822366864	10.14154957	9.708384082	9.745003945	9.73778455	9.282141615	9.849119834	9.873256109	9.750942251	9.887402474
Asns	7.855174378	8.648441818	8.552737896	8.335146316	8.909048989	8.996325959	8.845836754	9.588734131	9.566199253	8.685654844	8.931847971	8.406542174
Asnsd1	6.736539151	6.885057312	6.814676719	6.762101773	6.606257068	6.68732534	6.971416462	6.666285008	7.05539091	6.825804476	6.612093948	6.969800347
Asph	11.16596293	11.0555463	11.05163865	10.9612686	11.17757926	11.36098677	11.57792717	11.40114734	11.27462706	11.20163619	10.98860343	11.25575332
Aspm	9.014158709	9.197468658	9.331983475	9.157744502	8.774322968	8.068460378	8.119048772	8.782074225	9.521327365	10.04388001	9.858776795	9.369990315
Aspscr1	8.736957976	8.627576694	8.677855888	8.737304177	8.826097027	8.814730548	8.840855611	8.833602749	8.650667427	8.771415189	8.695010931	8.642815504
Asrgl1	6.063800363	6.347022235	6.242547223	6.384789704	6.299333438	6.389453534	6.16946548	6.519840559	6.411999614	6.038657646	6.363120712	5.870503151
Ass1	8.714391644	8.916301218	8.822341221	8.945279234	7.189813585	7.18327371	7.281013439	7.001913326	8.754283389	8.55891369	8.555133958	8.711296058
Aste1	7.888488624	7.973373926	7.699808319	8.146202367	8.374611807	8.459839827	8.55551804	8.153654763	7.94238618	7.772272858	7.950160252	7.905629481
Asun	8.57489457	8.565662347	8.42467901	8.691733877	8.661824717	8.544460257	8.35999782	8.444669513	8.297577552	8.424174234	8.749620008	8.397893448
Asxl1	10.68099278	10.53995732	10.65665481	10.75047816	10.5102267	10.35618845	10.09763868	10.46529546	10.41300864	10.70808236	10.84993463	10.38845451
Asxl2	10.73741052	10.71000233	10.8050164	10.77310761	10.90775188	10.89419438	10.83101732	10.94666115	10.80369198	10.84465767	10.81282065	10.72908561
Atad1	9.984959479	10.07769782	9.948798272	9.817233816	10.30290289	10.27876089	10.49571125	10.36695065	10.18923153	10.12063519	10.03258438	10.29290944
Atad2	10.57933185	10.50827306	10.71062352	10.64052041	10.18920492	9.905503922	9.744015665	10.42350312	10.76546246	11.12022225	11.07936004	10.46997569
Atad2b	9.418277813	9.187312214	9.283578553	9.381808758	9.329183402	9.374191879	9.247435532	9.128781061	9.063865857	9.249822978	9.280312986	9.300737252
Atad3a	8.927698672	9.133327918	9.062082448	9.094820364	9.683811906	9.65534312	9.619868792	9.789078559	9.321275342	9.144114882	9.25083468	9.048886997
Atad5	8.639680178	8.725823337	8.836586188	8.758461415	8.411427833	7.675037294	7.749279486	8.402763914	8.813062952	9.463310333	9.278305289	8.702945633
Atat1	6.516108942	6.401188877	6.142205477	6.155575764	6.53678059	6.200228102	6.48273773	6.711794559	5.76473923	6.216211783	6.192685554	5.950258438
Ate1	9.954036223	9.815928899	9.89766974	9.845628852	9.951546761	9.962066608	9.944666043	10.02184009	9.813986997	9.941574474	9.877234198	9.852101041
Atf1	9.648033212	9.604251829	9.618041981	9.506425596	9.766339287	9.764179423	9.680821032	9.800859234	9.665427659	9.711368906	9.780937145	9.772515329
Atf2	9.857570904	9.963299278	9.794183149	9.91347194	9.974559365	9.915199218	10.13628412	9.91330102	9.913787636	9.867419408	9.815450638	9.919144944
Atf3	12.84774523	12.7253447	12.94990106	12.58949394	11.58003915	11.31445674	11.00189025	11.38016526	12.29901462	12.68699756	12.7750077	12.7571398
Atf4	11.4518312	11.41588338	11.29104496	11.43701758	11.54407432	11.50744155	11.58549072	11.48999296	11.48885272	11.56143331	11.60822257	11.5577477
Atf5	8.297292711	8.153197806	8.190976684	8.427778534	7.923134405	7.610508155	7.829907726	7.689721614	7.77139642	8.228117574	7.970939126	7.874323387
Atf6	11.15427706	11.31213824	11.24443585	11.28818453	11.42657348	11.44635317	11.48227003	11.51112244	11.48369207	11.3060512	11.33783673	11.26523564
Atf6b	9.675052205	9.561777084	9.73016897	9.927562484	9.314495963	9.18903243	9.087990915	9.007844664	9.453927128	9.692665783	9.625315412	9.508068149
Atf7	9.891747828	9.746086605	9.77064121	9.739571558	9.788593518	9.804206069	9.876471121	9.958316814	9.714869486	9.844918158	9.7480985	9.697322459
Atf7ip	10.50665356	10.55228115	10.60576129	10.69633919	10.71306266	10.68036109	10.5663771	10.75446355	10.59939394	10.58646792	10.64697177	10.36830742
Atf7ip2	6.895574813	7.265570383	6.853866307	6.776668267	8.337483342	8.003882467	8.557287978	8.604761322	7.215755282	7.179360587	7.037659152	7.067383848
Atg10	7.392475628	7.503207166	7.527095189	7.328338245	7.611937323	7.742098877	7.792338444	7.791715683	7.635578026	7.394684934	7.320557344	7.51993705
Atg101	7.952613699	7.973355008	8.173186879	8.088980308	7.942218901	7.98685023	7.89462339	8.046484688	8.029362584	7.963989947	7.856384915	7.788730189
Atg12	9.792142935	9.718368933	9.721708362	9.736645392	9.476024996	9.604419003	9.554012345	9.311552539	9.75616393	9.701543926	9.748611154	9.97613393
Atg13	9.809599112	9.952789427	9.977980701	9.957710738	9.479273357	9.528583161	9.384004239	9.339408916	9.95317396	9.760673841	9.880061488	9.944926775
Atg14	8.474266634	8.478856906	8.437442318	8.623862572	8.577823686	8.473691598	8.243311817	8.539239135	8.314242075	8.41378389	8.685578259	8.203230687
Atg16l1	9.741981476	9.720490681	9.640749615	9.693200128	9.745165543	9.772800878	9.724836993	9.87653636	9.532793248	9.526648708	9.654353659	9.450203779
Atg16l2	8.545358704	8.759430222	8.60235975	8.700260442	8.681761964	8.072529986	8.453307136	8.419437365	8.415278813	8.810439272	8.586732595	8.522701673
Atg2a	11.40142479	11.49449059	11.43808931	11.47216167	11.18937032	11.1147247	10.78132019	10.98662542	10.99745857	10.97903839	11.36884419	11.1294666
Atg2b	10.06016638	10.01582439	10.01820505	10.13579965	10.16767952	10.33991109	10.13820125	10.28766071	10.01691522	9.889025641	10.08835483	9.82130077
Atg3	9.686766732	9.652071719	9.563919366	9.509796102	9.81474646	9.940647544	10.00582497	9.974137224	9.717255965	9.626049895	9.649024819	9.734835831
Atg4a	7.661611687	7.75720559	7.739766054	7.710603286	7.911771789	7.844603345	7.829650827	7.767632615	7.785622699	7.75719724	7.789589294	7.880770274
Atg4a-ps	6.119821491	6.192772963	6.041765262	6.326971409	6.053054247	6.087600351	6.198455344	5.73301732	6.26885615	6.161358574	6.201511283	6.381743159
Atg4b	9.267403833	9.242640922	9.239875859	9.378832275	9.192659843	9.342411666	9.328271325	9.121404347	9.178090875	9.053101964	9.070007368	9.137917929
Atg4c	8.926298584	8.936126243	9.025856821	8.831163944	8.948424642	9.169247505	9.065317827	9.042748836	9.1312738	8.900623277	8.914822378	9.132084245
Atg4d	7.803344797	7.781485122	7.941228941	7.975427855	7.941030223	8.027688749	7.874583094	7.849971732	7.762475048	7.697676196	7.691038032	7.681450481
Atg5	9.331093153	9.398918015	9.408408816	9.436463636	9.537171661	9.575060423	9.62731379	9.558581049	9.553489777	9.447776153	9.386031986	9.426709906
Atg7	10.4655147	10.33536242	10.54935271	10.59448153	9.91209306	10.09404139	9.867940267	9.911718187	10.4507326	10.39893655	10.41104739	10.32214065
Atg9a	9.045617461	9.096572098	8.930877805	9.148158741	9.073228503	9.232393184	9.270796493	9.262444618	9.033171284	8.823051966	8.950342951	8.74141389
Atg9b	6.196078444	6.350394956	5.941451041	5.839333305	6.905152639	6.942155777	7.239147662	7.41870748	6.04822494	5.85690529	5.96885732	5.891415238
Athl1	8.345947115	8.259390615	8.430033319	8.527045707	8.65600124	8.7248696	8.587875202	8.529325216	8.284615682	8.302303823	8.268655517	8.230193115
Atic	9.754361148	9.977911308	9.981061783	10.02933866	9.893151727	9.806197545	9.735936131	9.984386637	10.29219759	10.15560162	10.22271255	9.925985171
Atl1	5.950660601	5.910198525	5.989811292	5.950775313	5.792248268	5.681973622	5.616619517	5.581854003	5.845508893	5.996245614	5.981986953	6.055788446
Atl2	8.916049955	9.008879718	9.106939988	9.100159746	8.87627042	8.624465689	8.554194981	8.70099425	9.075245172	9.23422014	9.206430579	9.066411551
Atl3	11.65806528	11.66332823	11.73912633	11.70653664	11.77434794	11.70181098	11.70374407	11.73405198	11.78387832	11.85115232	11.77342114	11.77570292
Atm	9.301793023	9.33724531	9.321688209	9.171598496	9.37980885	9.353995293	9.365881843	9.762982688	9.514799543	9.505160814	9.508831364	9.261820232
Atmin	9.452030735	9.41871872	9.331682988	9.507955638	9.464525859	9.591967458	9.614301474	9.674541856	9.374052195	9.279922611	9.344624327	9.108111296
Atn1	6.130731006	5.87213727	5.764925677	6.115862135	5.86668641	5.936871292	6.146914624	5.789689174	5.779679339	5.968088194	5.865256454	5.871545446
Atox1	10.50915135	10.56344616	10.70020282	10.83135778	10.81177536	10.84736807	10.88976765	10.44451366	10.68665609	10.59676857	10.41761233	10.73171136
Atp10a	7.057277136	7.2354976	7.314184333	6.941481003	6.182492227	5.614070959	5.924158684	6.483546625	7.0701309	7.460331704	7.071557246	6.884872635
Atp10d	7.838368177	7.65680046	8.043980061	7.787491023	7.571999293	7.361032851	7.295799443	7.734637137	7.712296552	8.104830711	7.782884517	7.600535862
Atp11a	10.36035962	10.46874599	10.52753921	10.43937492	10.06419847	9.873026324	9.828926868	10.09214057	10.31993611	10.40272188	10.38802811	10.2129787
Atp11b	10.60620724	10.6689307	10.59568711	10.51350782	10.62868343	10.51671764	10.53844188	10.46113427	10.53830477	10.5875471	10.63906645	10.79855334
Atp11c	9.614761177	9.527242395	9.646859034	9.504577638	9.324481554	9.246691412	9.296926239	9.285314885	9.643889695	9.809198619	9.639347153	9.793239904
Atp13a1	10.10790865	10.18940976	10.11485992	10.24843092	10.29574522	10.40230113	10.45616431	10.33349912	10.24811804	10.06006102	10.08074769	10.06984188
Atp13a2	12.63828996	12.52432649	12.62302411	12.77133225	12.42102075	12.86277691	12.52886722	12.39676392	12.473017	12.14522431	12.38043638	12.36423155
Atp13a3	11.81943895	12.06654581	11.95439829	12.03569809	12.26838941	12.1473197	12.07222842	12.10567975	12.01775479	11.89171765	12.07895644	11.96420531
Atp1a1	13.48086587	13.79556614	13.72856166	13.71984618	14.27812754	14.45212336	14.47250723	14.41816072	14.08803935	13.59934327	13.64596388	13.70902586
Atp1a3	10.7651915	10.89296278	10.79233808	11.06976434	9.450075282	8.994714529	9.267117726	9.124252032	10.46467357	10.79226304	10.62048454	10.48592398
Atp1b1	5.469902689	5.859868965	5.321667887	5.092628642	6.086987239	6.59386572	7.042954352	6.996506656	5.918731882	5.021887124	5.11099957	5.386486511
Atp1b3	12.23329744	12.22633663	12.13753521	12.24623091	12.65072724	12.84097311	12.96257538	12.50838098	12.32986747	12.1465824	12.11378155	12.45928026
Atp2a2	11.94245152	12.06182213	12.08798415	12.18902577	12.21493554	12.21842351	12.18315614	12.23703759	12.25866509	12.13580651	12.14491187	11.9899888
Atp2a3	9.87183439	9.895733604	10.11308523	9.981803364	8.983223111	8.454808574	8.291898936	8.699420253	9.446821992	9.951337315	9.896895331	9.620655877
Atp2b1	13.07118376	13.10023975	12.99919684	13.13427973	12.55515553	12.41320698	12.53791663	12.24827123	12.88195609	12.99484865	12.9711819	13.12574442
Atp2b4	9.450301689	10.03471041	9.275155194	9.161847034	11.05969267	11.57527882	11.94907913	11.70195709	10.13760232	9.037607443	9.423362352	9.783792547
Atp2c1	10.98740371	11.12227175	10.95626446	10.92110457	11.7114025	12.05182968	12.18704862	11.84709833	11.34631564	10.87102041	10.90180876	11.27691895
Atp5a1	13.2577705	13.55139535	13.35391208	13.30931188	14.08305798	14.26897861	14.31446326	14.34024029	13.77864139	13.29909591	13.45109453	13.4699177
Atp5b	13.58243731	13.90421371	13.75568799	13.62020134	14.54320959	14.67208111	14.729003	14.88163326	14.21290881	13.7622609	13.85386472	13.83672111
Atp5c1	10.76298013	10.84858539	10.69277136	10.60814818	11.29231079	11.48929697	11.63680222	11.57624451	11.04182076	10.75922932	10.7675381	10.91271898
Atp5d	10.73397904	10.8900461	10.75948041	10.7855825	11.48264683	11.68775093	11.87463728	11.79109479	11.11150838	10.75033722	10.69401655	10.75145696
Atp5e	9.816184612	9.867402982	9.894611649	9.78059572	10.11152155	10.28761693	10.19078066	10.15925032	10.03135047	9.804036723	9.873664327	10.0192106
Atp5f1	10.59239264	10.6670138	10.52687506	10.35613663	11.10722307	11.28777396	11.49420603	11.37373875	10.87760144	10.62242939	10.55613607	10.84734177
Atp5g1	8.354787866	8.558292006	8.437749497	8.056229791	9.068163177	9.576923489	9.508001964	9.658553501	8.882488897	8.170224445	8.359688479	8.590656648
Atp5g3	11.09510106	11.38585771	11.23330126	11.02710896	12.04868738	12.31516071	12.33617365	12.38913488	11.69558425	11.13835427	11.26989778	11.42312885
Atp5h	8.758342225	8.833258197	8.847364969	8.699046362	9.444221985	9.488870885	9.706328936	9.337677015	8.948697314	8.829132442	8.597567618	9.114538146
Atp5j	9.309980954	9.355537742	9.234169502	8.886771959	9.693508302	9.914494886	10.06194688	9.916766912	9.450552408	9.184009036	9.157925278	9.650502792
Atp5j2	9.494604956	9.303198751	9.218397137	8.986442426	9.691038665	9.989100351	10.13173184	9.962062434	9.349163734	9.242508253	9.184678377	9.586302495
Atp5k	7.853860224	7.130034925	7.043065694	6.998606639	7.289715568	7.573205421	7.979660074	7.81848433	7.015994594	7.45633004	7.136844617	7.342479417
Atp5l	6.324793886	6.433272685	6.220079932	6.531225431	6.654711956	6.680229384	6.9334096	6.107676545	6.409579279	6.275583052	6.235595588	6.750183144
Atp5o	9.789966202	10.02501579	9.932712897	9.77870263	10.64897018	10.76137957	10.87294226	10.92265346	10.30439953	9.956940548	9.937680754	10.04197982
Atp5s	6.211843519	6.18917627	6.084747268	5.746291678	6.118280815	6.257297988	6.272475041	6.802602202	6.145047516	6.028697592	6.11794954	5.92627797
Atp5sl	7.870904022	7.701982267	7.97490008	7.878414991	8.100772623	7.869017305	7.67745452	8.139969927	7.622799043	8.023476116	7.942121088	7.57609077
Atp6ap1	12.64865454	12.74487312	12.58934064	12.69474771	13.17840736	13.42941931	13.64940863	13.23945147	12.87398601	12.52675548	12.46229864	12.76684873
Atp6ap2	12.55125123	12.77283108	12.51095239	12.49211593	13.28274771	13.58866269	13.78539076	13.49404538	13.0225988	12.49510397	12.56025458	12.87043643
Atp6v0a1	11.95255879	11.97828629	12.04903326	12.11153841	11.02158897	10.54866659	10.82774545	10.73600078	11.58584798	12.03304286	11.68321703	11.71245655
Atp6v0a2	9.659858855	9.739567246	9.788034894	9.653979715	9.763279416	10.0127936	9.900691502	9.916940357	9.8560746	9.526852026	9.590486475	9.7082928
Atp6v0b	11.90190711	12.03181774	11.85244186	11.9227343	12.63460813	12.89636688	13.01737427	12.68207611	12.19772189	11.80605251	11.86442101	12.12942672
Atp6v0c	10.76742173	10.6494419	10.39601437	10.55305244	11.10817811	11.18063549	11.51415983	11.23118978	10.51386378	10.55938624	10.47928942	10.6052214
Atp6v0d1	11.42857098	11.39488562	11.4216975	11.5932829	11.48456939	11.75556006	11.69480493	11.36873992	11.54597895	11.30867363	11.34261688	11.4970965
Atp6v0d2	12.80185949	13.1274841	12.42528184	12.3324504	13.95589095	14.4546758	15.10193388	14.66869197	13.30076679	12.47635732	12.53130151	13.05737486
Atp6v0e	11.32174179	11.44699397	11.25695328	11.2206943	11.99624271	12.33077224	12.49551237	12.12584137	11.66640398	11.20662227	11.23192282	11.6378528
Atp6v1a	14.07617167	14.28767367	14.07692265	14.07245759	14.77990134	15.25525554	15.40309545	15.0275808	14.68235941	13.99550321	14.05841431	14.43839403
Atp6v1b2	14.23104775	14.58255114	14.19985925	14.12808752	15.36255393	15.74552391	16.05096406	15.68365009	14.76166138	14.02718801	14.10443975	14.54352545
Atp6v1c1	12.21155329	12.39831254	12.19484189	12.22491607	12.9643765	13.40619153	13.50907144	13.19307768	12.72687754	12.09830326	12.198894	12.48481359
Atp6v1d	11.49741993	11.7729791	11.35074385	11.39738893	12.44768738	12.85085363	13.10506504	12.71091643	11.98042969	11.30170427	11.46972812	11.81723164
Atp6v1e1	12.17617884	12.32990751	12.08119239	12.18743632	12.98778263	13.26274572	13.54600168	13.04750831	12.47750634	12.04881458	12.01427375	12.40652318
Atp6v1f	10.65709213	10.77187791	10.66651985	10.68578408	11.23537425	11.54870983	11.69354743	11.35469478	10.99995383	10.57183247	10.53235293	10.85194135
Atp6v1g1	10.75736439	10.81460356	10.65787259	10.61584449	11.43668544	11.86545387	11.99104902	11.48457132	11.05856626	10.57255865	10.60369447	11.15220028
Atp6v1g2	6.202660561	5.858867267	5.753416066	5.857628331	5.856138726	6.002231419	5.885674024	5.728486578	5.359406013	5.557106615	5.779115211	5.832090391
Atp6v1h	11.91401503	12.20573688	11.91701647	12.00281783	12.68866908	12.96061551	13.0439205	12.7112429	12.45432911	11.89066084	12.09607626	12.3429525
Atp7a	10.44529281	10.46933808	10.46877966	10.73155197	9.727622523	9.75199263	9.79860509	9.368729943	10.32029809	10.27188272	10.22582867	10.39293152
Atp8a1	10.46006659	10.29459815	10.3559389	10.33115494	9.81958049	9.711263383	9.537773457	9.722482676	9.918288155	10.19207371	10.30422288	10.14429762
Atp8b1	6.15012842	6.010263572	6.119795439	6.498526619	7.114082216	6.978898678	7.267111202	7.238320373	6.338250507	6.613298894	6.215554503	5.865614152
Atp8b2	8.263678249	8.549909748	8.443222313	8.486051488	7.638641203	7.080529841	7.217661489	7.275908283	7.970170643	8.242050507	8.211606294	8.110530325
Atp8b4	10.32971652	10.5231057	10.70968444	10.67490466	9.455849063	8.955287993	9.100449195	9.336825919	10.67586189	10.98303378	10.65129383	10.44969689
Atp9b	10.97538066	11.08134601	11.09957532	11.17389267	11.29627565	11.42194356	11.35996595	11.28257371	11.24606392	11.01443066	11.05817897	11.06125386
Atpaf1	7.145652121	7.107023837	7.033303305	6.979702866	7.328521237	7.363730667	7.366288008	7.637589153	6.953800248	6.957219102	7.028382293	6.810681587
Atpaf2	8.265517687	8.261137214	8.210521108	8.47332029	8.6512318	8.826624139	8.758871407	8.654702685	8.554658301	8.383646435	8.502015272	8.343384812
Atpif1	8.642013717	8.100021394	8.069665548	8.040529837	8.069510762	8.023039086	8.335103958	8.280062976	8.004689391	8.593153391	8.311444365	8.395621057
Atr	9.239038398	9.270690842	9.415372857	9.28634928	9.633660365	9.271332303	9.494021959	9.826895355	9.559124715	9.889800333	9.522428662	9.318578842
Atraid	8.293392656	7.858913968	8.175033536	8.165206072	8.16781747	8.443833532	8.345687541	8.28817599	8.103792395	8.262255021	8.044281444	8.111620458
Atrn	9.768893432	9.832840516	9.774311365	10.02808171	9.889125292	10.06248048	9.953547147	9.757831307	9.90092351	9.663621235	9.831083722	9.773029214
Atrnl1	10.38074535	10.44840936	10.43932666	10.4278457	10.91584517	11.21146906	10.92904285	10.93390538	10.4017212	10.03843329	10.32994221	10.33656063
Atrx	11.82016398	11.6100782	11.60983267	11.65045609	11.5381094	11.44634181	11.5561626	11.46740647	11.43602736	11.73788073	11.62830547	11.67643818
Atxn1	10.57327251	10.39168685	10.39604204	10.51540901	10.5047787	10.86306435	10.70648884	10.37692903	10.26681188	10.09011189	10.2423322	10.45252505
Atxn10	10.13225764	10.10775476	10.09831994	10.11107985	10.28409266	10.56071252	10.66039657	10.53042673	10.49068825	10.23857126	10.14832204	10.26553197
Atxn1l	10.29768251	10.22339869	10.24070907	10.28303255	10.3543844	10.29745547	10.32817817	10.18995071	10.24338411	10.37459685	10.32656378	10.42246776
Atxn2	10.25095479	10.17414615	10.11601687	10.16566048	10.7911095	11.01882842	11.06909801	11.01426069	10.15111163	10.00020135	10.00806104	10.01325474
Atxn2l	11.31668522	11.24641929	11.18834106	11.28275147	11.07975052	11.14601802	10.9915903	11.02361023	10.93542068	10.9394191	11.15192505	11.02549472
Atxn3	10.31882459	10.33791247	10.31489686	10.35538539	10.49664681	10.54627212	10.70661183	10.51500593	10.44637357	10.37766038	10.24033628	10.39145365
Atxn7	9.282561778	9.109192674	9.332386573	9.148419553	9.029608933	8.920591511	8.798062127	9.010327273	8.990730105	9.273116632	9.172452117	9.144153991
Atxn7l1	10.07549085	9.837887763	9.981588049	10.27563655	9.87102046	9.852923462	9.762780835	9.706557338	9.775090079	10.03079017	9.977232507	9.739407502
Atxn7l1os1	6.637527798	6.820372572	6.839652724	7.062351223	6.689476625	6.866251688	6.723548638	6.720757125	6.925908587	6.56628875	6.689711648	6.469804661
Atxn7l1os2	5.739905404	6.046067902	6.141197286	6.144817761	5.875475822	5.821865719	5.903434991	5.656293156	5.922853834	5.670301439	5.493602782	5.737124143
Atxn7l2	6.394230959	6.474481817	6.51823064	6.537774716	6.209167279	6.27522263	6.113197913	6.246048507	6.343497288	6.197191079	6.315466973	6.163072303
Atxn7l3	9.847267587	9.788018734	9.878374213	9.86600869	9.840150971	9.84593911	9.700529756	9.921052485	9.721122197	9.774582911	9.829636785	9.62147958
Atxn7l3b	9.863795219	9.885845655	9.866069507	9.875543682	10.26914018	10.40268596	10.43797959	10.32863561	9.981017581	9.825421366	9.809903878	9.909773685
AU019823	8.544037072	8.529007372	8.282717252	8.246510481	8.222562312	8.158025642	8.226443275	8.056830029	8.274223157	8.353789528	8.531662015	8.737482032
AU020206	8.636361652	8.64644583	8.435287397	8.269912156	8.24664839	8.302486598	8.468469101	8.708047255	8.72009943	8.654177045	8.699352975	8.625150062
AU022252	7.683887425	7.740478977	7.597557919	7.661023281	7.93550647	8.073954202	8.087732987	8.112114279	7.751711937	7.556672653	7.685814926	7.597968272
AU040320	9.862371252	9.879304725	9.85751539	9.97814685	10.28385121	10.55229101	10.44507998	10.28841377	9.919904466	9.634531195	9.763531554	9.79956631
AU040972	6.138340401	5.790996065	6.282675255	6.287461646	6.089146287	5.943959164	6.270824434	5.942608593	6.200630764	6.693162222	5.874617763	6.198047213
AU041133	6.014285908	6.0150048	6.08688485	5.788214548	6.35091977	5.986690641	5.989075379	6.591624033	5.939967539	6.303477776	6.229212988	5.925334635
Auh	8.738583219	8.575704436	8.766480997	8.537456759	9.005991888	9.15318753	9.068517864	8.95094528	8.674958605	8.690641745	8.584534851	8.931131673
Aunip	5.607918782	5.590747464	5.900863849	5.901460615	5.505657781	5.130291344	5.206138449	5.830931782	6.33804537	6.730583125	6.344619634	5.719229535
Aup1	10.34176209	10.18936479	10.18802812	10.37034255	10.33208879	10.40410677	10.44115123	10.34048559	10.13535334	10.21573267	10.18002488	10.09837609
Aurka	8.035771851	8.189590123	8.388287118	8.532866327	7.959409496	7.38925987	7.551507512	7.668130493	8.623937574	9.040268927	8.67932429	8.4181221
Aurkaip1	8.800652751	8.760213482	8.779815266	8.818501218	8.9590974	9.001610606	9.106016335	8.966844226	8.943746427	8.941672489	8.817664976	8.918151134
Aurkb	8.089159162	8.228872357	8.46042706	8.556455572	7.754986866	7.011938837	7.018686058	7.200615576	8.428472867	9.031807701	8.793505776	8.515547747
AV356131	6.109389511	5.772582461	6.180345614	5.821395078	5.912137444	5.56228348	5.514387892	5.39366304	5.505555649	6.192216662	5.832349099	6.312024486
Aven	7.280068538	7.498281363	7.459259906	7.257756995	7.788718775	7.688285292	7.635833092	7.731548581	7.653643813	7.535864472	7.627338129	7.733125551
Avl9	10.32431925	10.42539155	10.29037027	10.29153437	10.49936632	10.64685956	10.6089092	10.56471844	10.40089487	10.15232934	10.32530097	10.36832763
Avpi1	7.73002872	7.791424034	7.708043464	7.573259555	8.017609772	7.946293161	7.764591463	8.276191527	7.77975663	7.789677928	8.054760196	7.677944039
AW011738	8.358940012	7.385656531	7.995126557	7.956878191	7.940736086	8.136251353	7.844258927	7.282048595	7.144181843	7.921950057	7.604472457	8.204931155
AW112010	6.35542887	5.815611789	6.155995369	6.338380815	5.554598277	5.735255652	5.630866737	4.946710407	5.576345633	5.93550534	5.699510675	6.201281559
AW209491	6.702144007	6.625895195	6.753523662	6.758401504	7.111006722	7.325747412	7.33120257	7.374861397	7.189695967	7.05120409	6.918120466	6.869583795
AW549877	10.27776996	10.11364499	9.959586138	10.01624192	10.59463128	10.65267517	10.74022487	10.6033294	9.898372385	10.00445345	10.07096261	10.1512023
AW554918	7.923224374	7.846585673	7.9909325	8.12270828	7.697795501	7.549720814	7.611452302	8.004226652	8.097842323	8.32255571	8.116477396	7.591927266
Axin1	9.835895072	9.864390527	9.990602493	10.07305814	9.638796269	9.560827961	9.376586982	9.47462431	9.796454233	9.845927086	9.903956099	9.723463128
Axl	9.364840455	9.141430025	9.406345474	9.736219324	7.675754442	7.032047487	7.266580204	6.928373974	8.810913355	9.67803074	9.178582575	9.186914955
Azi2	10.10492958	10.06934066	10.08424693	9.960514106	10.07185485	10.09049075	10.14564648	9.994402551	9.984773253	10.00172627	9.931664284	10.20664103
Azin1	11.72436712	11.813164	11.79563385	11.94812908	11.72722398	11.78000738	11.77401826	11.63476072	12.11915372	11.97757344	12.00109271	11.98785501
Azin2	7.383498773	7.352458743	7.185063979	7.012733823	7.478554349	7.21734593	7.470522165	7.450828914	7.076630769	7.368879219	7.283097748	7.475121155
B130006D01Rik	6.874438936	6.76904749	6.496209858	6.602297777	6.581224755	6.675869613	6.456939412	6.956789658	6.388843143	6.399589731	6.891357565	6.285419399
B230118H07Rik	6.098044255	5.955524244	6.160395145	5.890652098	5.982013235	5.999230278	6.052230734	6.064323159	6.112834588	6.238137556	5.980266199	6.237916821
B230216N24Rik	6.960497018	6.961230297	6.886406081	7.009449055	6.555606413	6.420445473	6.680218267	6.225586551	7.084207256	7.218634917	7.033686338	7.365275081
B230217O12Rik	6.1643374	5.981085389	6.156367353	5.556410733	5.583984844	5.525365138	5.087384611	5.870958393	5.599054032	5.840925748	6.103624311	5.920007149
B230219D22Rik	10.05765034	9.998593609	9.995388933	10.15909766	10.19844939	10.14532076	10.3120866	9.844405807	9.983730259	10.09591562	9.932354456	10.23632652
B230303O12Rik	6.341158545	6.414243849	5.93995308	6.128955361	6.417889728	6.239186565	6.36847255	6.367825517	5.699216166	5.804834026	6.149838809	5.961483561
B230307C23Rik	6.36323242	6.374283494	6.254179813	6.281626139	6.286855825	6.181144389	6.290514175	6.045353877	6.487896008	6.58255637	6.593290266	6.811004238
B230319C09Rik	7.311357735	7.414611144	7.501513737	7.482681903	7.158489275	6.633137712	6.3997095	6.945069164	6.837581424	7.259679579	7.406205199	6.879677368
B230354K17Rik	7.569532095	7.762678338	7.529508562	7.523322728	7.88585799	8.031615923	8.195973595	8.304565357	7.679974823	7.341070647	7.409882751	7.307476823
B230369F24Rik	5.901294715	6.393448876	6.077778822	5.925185401	5.996162217	5.721110152	5.540480349	5.857853251	5.936669912	5.719567817	6.215867673	6.051088192
B2m	14.25446996	13.89675451	13.97040721	13.85451343	13.51614373	13.09788434	13.53593157	13.25810177	13.52193625	14.29791108	13.78621115	14.17993473
B330016D10Rik	5.767537426	6.094230699	6.013317618	5.782720147	6.545896618	6.025669099	5.907541799	6.010193402	5.519221388	5.712755633	5.911796014	6.039741883
B3galnt1	6.499231015	6.353633277	6.516588647	6.420958588	6.756553483	7.121182002	7.177133521	6.971287432	6.983671222	6.764640441	6.545733552	6.8472097
B3galnt2	7.612288607	7.74030244	7.659385522	7.574437831	7.537883604	7.675136026	7.489796557	7.65474309	7.667044016	7.401777762	7.668034148	7.588035306
B3galt2	7.806409803	7.859420039	7.807774382	7.741820073	7.551246289	7.340067197	7.157367889	7.51450279	7.531574759	7.689743614	7.924088579	7.632907987
B3galt4	6.511015843	6.696213166	6.498788661	6.428513372	6.624502914	6.485597906	6.577786674	6.48839902	6.350783371	6.304491056	6.409726794	6.569389736
B3galt6	6.933078343	6.864602495	6.933248363	7.005417451	7.234938752	7.157230311	7.245019144	7.355234427	7.22917252	7.37535681	7.218922109	7.036537737
B3gat3	8.828390733	8.814729767	8.913074946	9.068668182	9.258349077	9.471817754	9.274905208	9.109610904	8.9387205	8.738912789	8.837480155	8.847181223
B3glct	7.149001269	7.04165484	7.361537829	7.158192186	6.720314427	6.480194221	6.551460456	6.848623714	7.385229551	7.732696187	7.341546962	7.247729348
B3gnt2	6.455266059	6.327800658	6.48141642	6.189050794	6.243470822	5.931230117	5.819936267	6.191317573	6.162126261	6.601832367	6.559510454	6.480494774
B3gnt3	8.456148655	8.533843889	8.698459784	8.551851031	7.739325229	7.297548648	7.363286974	7.559331442	8.249250883	8.61333223	8.38297801	8.333542294
B3gnt5	5.487307793	5.982230851	5.593901861	6.01994156	5.979626823	5.74035408	5.913549882	4.926676462	5.550036761	5.294386446	5.509519635	6.070353356
B3gnt8	8.535675714	8.521208334	8.659968131	8.428460315	8.115939981	8.010736314	7.783527166	8.170535912	8.288208125	8.407879172	8.496328522	8.340827593
B3gntl1	6.889888362	6.900207351	7.092253131	7.044914455	6.934281528	6.755195538	6.716350961	6.985564749	6.941768783	7.110535783	6.957334582	6.735459469
B430306N03Rik	9.362954807	9.405356845	9.388216689	9.428164587	8.389298086	7.861333788	8.417137841	8.343819402	8.999505264	9.485067524	8.946403627	8.979774168
B4galnt1	9.804785116	9.549168914	9.659880818	9.84004817	9.007784984	9.167823884	8.954202204	9.068018162	9.569424979	9.665002282	9.767912058	9.473928748
B4galt1	10.94153376	11.02165089	10.92956723	11.08411733	10.71612398	10.94413907	10.87197968	10.60032083	11.00943087	10.70129866	10.86554171	10.98265046
B4galt2	5.526562228	5.74991679	5.61205869	5.848869874	6.279414483	6.341421193	6.330739016	6.064507338	5.747253786	5.461892513	5.61043279	5.639853284
B4galt3	7.304116434	7.467586747	7.199374842	7.178940651	7.652317926	7.707366246	7.760764733	7.577814102	7.268342491	7.049823858	7.264637275	7.468022097
B4galt4	6.351851875	6.486704713	6.212508752	6.369690069	6.54576481	6.492887998	6.770612975	6.699255851	6.521457034	6.439481009	6.435951992	6.350127799
B4galt5	11.18149153	10.96448876	11.05144578	11.26541719	10.28362641	10.26964224	10.37851463	10.06531013	10.84562032	11.07660726	10.88077785	10.98001094
B4galt6	10.69337406	10.7643663	10.87430572	10.83075329	9.87639184	9.287899508	9.458548784	9.521323212	10.33099503	10.84849512	10.56790643	10.54868442
B4galt7	8.764750416	8.886389278	8.688411423	8.536990931	9.273312598	9.670696749	9.591676276	9.691080369	9.005274396	8.486251382	8.763249709	8.81526611
B4gat1	8.308739421	8.132333267	8.173605964	8.221239804	8.259811463	8.489526231	8.379754307	8.380369816	8.221428608	8.168119995	8.236619221	8.188369872
B930036N10Rik	8.10277608	7.992779177	8.129463372	7.980794552	7.978869412	7.798834799	7.153435407	7.492174088	7.845869207	8.135900723	8.64461592	8.454546059
B9d2	7.230323617	7.137145919	7.448166153	7.411813521	7.332576322	7.318469466	7.218423697	7.301795328	7.308437567	7.415722121	7.204747656	7.157728658
Babam1	9.349008043	9.103571931	9.40042543	9.393970362	9.145607677	9.039414697	9.080388889	8.992414371	9.306474899	9.658103992	9.3202763	9.414705886
Bace1	9.027308323	9.034445011	8.910594263	8.854541994	9.041325873	9.059123841	9.097462849	9.149429389	8.778079245	8.753144589	8.838656329	8.842742059
Bach1	11.94972347	11.79340433	11.93646447	11.92105776	11.33897908	11.31605072	11.06624673	11.08372516	11.62241195	11.80165944	11.90840329	11.90633157
Bach2	6.025930423	5.954538226	5.983807974	5.874271859	6.153054097	6.660719272	6.758268899	6.540935315	6.272128918	5.83585594	5.709036565	6.035906265
Bad	8.253176145	8.193027167	8.215932169	8.199416669	8.574757458	8.772182701	8.879126921	8.666627538	8.300363207	8.163086942	8.033237721	8.262252604
Bag1	10.31051234	10.20267822	10.30205341	10.18808293	10.10159915	10.25939007	10.24131765	10.28602952	10.49613584	10.44617904	10.36487627	10.43413488
Bag2	5.872957969	5.822778088	5.937174641	5.447770163	6.234174092	6.983992624	6.466502097	7.123158771	6.403734454	5.704095803	6.107189777	5.939937581
Bag3	10.1182041	10.13185728	9.710940036	10.22453181	10.21100661	10.62915212	10.39530531	9.826340487	9.865111744	9.433313054	10.08807711	10.14345016
Bag4	7.92905389	7.739611297	7.927829965	7.618858413	7.950325669	7.882821555	7.709383398	8.223217485	7.695818279	7.952764985	7.937984474	7.733121939
Bag5	8.212372297	8.110536932	8.305393037	8.427423142	8.423239559	8.364905779	8.392510466	8.153348101	8.312589558	8.472758702	8.250297911	8.367430171
Bag6	11.65103354	11.6490678	11.73661832	11.90214127	11.76560075	11.93216204	11.71292377	11.67331324	11.71688751	11.55229195	11.6839797	11.55806728
Bahcc1	6.982385536	7.342664773	7.53574746	7.142049944	7.63108965	7.410188381	7.060544139	7.995674918	7.679758545	7.540380577	7.696942132	7.155508868
Bahd1	10.05341964	9.926319391	9.899098378	9.971476211	9.976177966	10.15272547	10.1029118	10.01502537	9.782820749	9.733373489	9.810408175	9.825916771
Baiap2	11.1744732	11.30915863	11.09036115	11.15675003	11.00727205	11.23502841	10.90336992	10.76307738	10.89581386	10.53337207	11.08382804	11.1577317
Baiap2l1	7.830349001	7.715143704	7.98507453	7.847672622	7.763300869	7.544797769	7.27783924	7.24800344	7.446033071	7.779741468	7.776769172	7.94400688
Bak1	9.467006467	9.436093547	9.386250532	9.707462559	9.184559944	9.262087659	9.480567703	9.068932973	9.600473751	9.553858957	9.385221928	9.47564463
Bambi	6.825403295	6.510849432	6.26323769	6.437810103	6.731638299	6.765703459	6.817192626	6.492960341	5.928611618	6.209100321	6.405222896	6.554882767
Banf1	8.892251143	9.138023429	9.226374824	8.880919563	9.488786152	9.30128454	9.327231928	9.768457314	9.49875113	9.440480457	9.326181672	9.230411547
Bank1	7.37398356	7.250837048	7.592312485	7.51324498	7.154510395	6.334488985	6.507553369	7.012584455	7.129888175	8.073056097	7.558516276	7.132552695
Banp	7.531620093	7.666682606	7.773522875	7.597433854	7.666877459	7.801427819	7.687910512	7.644786558	7.595694482	7.326081609	7.332758646	7.551971622
Bap1	10.03108324	10.07385323	10.00689773	10.07835145	10.15386557	10.20809905	10.11498458	10.11271536	10.01144129	9.914437821	10.07450779	10.00532329
Bard1	7.448332068	7.782846245	7.973947176	7.863608516	7.573216912	6.617853102	6.798103916	7.066197454	7.938336108	8.559185742	8.187833996	8.030079118
Basp1	11.21428148	11.11863127	11.13683617	11.20619381	10.9525067	11.06800384	11.11265182	10.80506264	11.20092016	11.18107323	11.11822035	11.35645189
Batf	6.303029039	5.81883258	6.058508807	5.911391155	5.638103001	5.900214854	5.613768628	5.348705603	5.871833226	6.093917832	6.140687831	6.552868509
Batf2	6.242816074	6.345814179	6.14495096	5.98634222	5.939295106	5.456752003	5.685446422	5.452904964	5.598202397	5.977747395	5.949916195	6.341066393
Bax	9.393963845	9.308655402	9.646832112	9.348432948	8.752787183	8.421920316	8.281588388	8.57375843	9.1327061	9.548881409	9.351036627	9.35726575
Baz1a	10.42681687	10.42082708	10.37810336	10.5929896	10.25387523	9.975204718	10.03611935	9.817884379	10.19562646	10.48028676	10.46209586	10.46544458
Baz1b	11.17968822	11.11289054	11.25566561	11.27277692	10.99384599	10.76905707	10.75190191	10.9335641	11.1174232	11.40900978	11.28338988	11.08461639
Baz2a	10.81876542	10.69093942	10.64421182	10.7092747	10.71975705	11.0599198	10.96523416	10.78113422	10.44097989	10.22864314	10.37005638	10.48909344
Baz2b	11.15004156	11.04309942	11.13501022	11.22831586	11.19628274	11.26070931	11.20863349	11.18382455	11.15022446	11.19274002	11.15290504	11.08440835
Bbc3	9.541177626	9.713876008	9.472158653	9.376249212	9.091522233	9.049569035	8.636572426	8.934970451	9.262720754	9.131975571	9.786689534	9.584200951
Bbip1	7.845835275	7.774522142	7.712283584	7.790333667	8.114603945	8.248389666	8.202449939	8.198625973	7.862628077	7.800155488	7.908333774	7.834107656
Bbs10	8.373584799	9.045247441	8.792969121	8.801018833	7.73255331	7.672736844	7.734902999	7.009158491	8.616849714	8.005003538	8.195115704	8.912810499
Bbs2	6.568332423	6.173378429	6.297596462	6.184215655	6.697954017	6.847567217	6.612319248	7.044094179	6.238286626	6.48362742	6.594657356	6.276263233
Bbs4	6.653348731	6.23990944	6.296673417	6.272701553	6.922575665	6.901652774	7.025889313	7.126582739	6.297708752	6.732070933	6.551070418	6.474348855
Bbs5	5.797639604	6.144632003	5.755709338	5.667363315	5.691600944	5.512066668	5.691811784	5.634644513	5.847036596	5.679578473	5.888756022	6.034269317
Bbs7	6.679366917	6.644559412	6.606198394	6.228992601	6.166798764	5.882616544	6.194370616	6.075197163	6.212007988	6.530997713	6.257604659	6.753983906
Bbs9	8.072830782	7.951411109	7.864509592	8.175014609	8.244930463	8.455876363	8.522397225	8.029017716	8.111975816	8.02244959	8.042830245	8.225704736
Bbx	11.05074725	10.94919322	10.94199219	10.9869306	10.67083245	10.81683627	10.8695556	10.48707423	10.89189947	10.84744968	10.80193138	11.13947434
BC002059	6.298744311	6.075446994	6.185889783	6.16677453	6.287401181	6.209958307	6.40679571	6.394247785	6.160468551	6.461208742	6.153928549	6.185591728
BC002163	8.014808753	7.784989848	7.946722161	7.58763111	8.336308131	8.647613699	8.942042287	8.553258464	8.148192276	8.066705613	7.610544712	8.358419586
BC003331	9.226522825	9.211245637	8.993773702	8.884650224	9.223404564	9.203713526	9.435499238	9.23344528	9.185314983	9.220283208	9.205969431	9.517146867
BC003965	7.885747404	7.753672659	7.798332121	7.821654217	8.345211506	8.46909126	8.486009259	8.340989375	7.933454748	7.941649739	7.880072278	8.001770066
BC004004	8.93243071	8.878490891	9.00687877	9.263315209	8.922024367	8.912964151	9.062709596	8.784633064	9.068667159	9.131667194	8.85353387	8.875173963
BC005537	13.28450691	13.21145824	13.29710128	13.36956372	12.70684812	12.49387189	12.57779639	12.57995758	13.08368164	13.36970653	13.200139	13.12551537
BC005561	7.685796964	7.514355925	7.290438888	7.388269362	7.66047695	7.301583321	7.647787828	7.684289303	7.132557747	7.662892414	7.540604944	7.406272996
BC005624	9.078033468	8.940853245	8.84715891	8.872314469	8.936872514	8.756822617	8.905561304	8.732683604	8.690983761	9.008213881	8.95316953	9.100891671
BC017158	7.665645602	7.663369361	7.727941398	7.917761367	7.806378297	7.855338428	7.653266377	7.753570226	7.736269021	7.689585132	7.827085145	7.536961328
BC017643	9.320079716	9.228942957	9.208581189	9.280413985	9.079174698	9.222485447	9.26523439	9.338942089	9.279795025	9.227621036	9.20523386	9.059693365
BC022687	6.442873325	6.43092408	6.312989131	6.267865681	6.086725761	6.670525396	6.221590661	6.541296051	6.471515677	5.899665286	6.46653497	6.19195303
BC024978	7.415237095	7.275310502	7.381666575	7.713099127	7.591492687	7.589083329	7.521894571	7.360974128	7.142718123	7.285054074	7.245886759	7.07537465
BC026585	7.471603918	7.530850875	7.38611961	7.440788533	8.052814809	8.185114631	8.4071661	8.364413991	7.640396044	7.448849265	7.371529061	7.359612247
BC028528	6.562857386	6.199684312	6.537570827	6.343992824	5.991415504	5.68392621	5.99342059	5.527795185	6.018991542	6.689653909	6.042273014	6.701476422
BC028777	5.524461861	6.183916426	5.794717594	5.944721471	5.967589521	5.825794144	5.359935892	5.705300589	5.88435726	5.366698072	6.221755155	5.726386582
BC029214	6.752967481	6.485066038	6.38646347	6.742261454	6.721227672	6.877684056	6.92535984	6.709241979	6.396348508	6.507793568	6.558720353	6.419040229
BC029722	7.375292541	7.086966086	7.305532984	7.191706615	6.875896199	7.041612952	7.291445436	7.313433268	7.156386458	7.278996161	6.810596779	6.902435315
BC030336	7.595085534	7.672804745	7.655551091	7.522437284	7.291825516	7.096844821	7.27466786	6.991723855	7.540285639	7.657547123	7.496977738	7.91303555
BC030867	6.850371819	6.939930611	7.123098391	7.350386734	6.578240933	6.048744404	6.112759876	6.260548344	7.073069463	7.513007201	7.265823948	6.890747137
BC031181	9.428548092	9.36024923	9.389326848	9.368989439	9.635547222	9.859483429	10.07917021	9.604846095	9.633520081	9.477882735	9.229118338	9.72377986
BC037032	6.315881202	6.139136135	6.116232183	5.952315244	6.060983073	6.672469979	5.920874241	6.164674128	5.99765137	5.56290953	6.337409221	6.257526272
BC037034	9.372925006	9.257472837	9.272802097	9.483651455	9.315734812	9.428075449	9.473614146	9.393719402	9.055896133	9.059007665	8.998139708	8.867185093
BC046401	5.797785026	5.722212404	6.008757725	5.551768144	5.635407771	5.476485578	5.435488011	5.582958538	5.605799851	5.840294666	5.594746911	5.904265966
BC048403	7.5515472	7.442072339	7.486482179	7.273787159	7.612810646	7.605689933	7.656795807	7.77199106	7.550243166	7.666838741	7.571323026	7.668822793
BC049715	6.327523184	6.384127553	6.316852479	6.32556179	6.461370801	5.972654244	6.060753696	5.618206584	5.941868635	6.373980822	6.353156444	6.786994245
BC052040	6.934062159	6.722994757	6.676202984	6.403103149	6.456943659	6.328100137	6.39454062	6.981727933	6.615698928	6.955609852	6.935961142	6.621873664
BC055324	6.61807974	6.765786076	7.048309213	7.253191588	6.641587142	6.07999981	6.067283627	6.188547655	7.000241555	7.414122551	7.144315596	6.818169193
BC065397	5.36354188	5.512405835	5.331401203	5.458064813	5.98088831	5.972801179	6.222080797	5.734619223	5.647332356	5.506555531	5.438280546	5.79907851
BC068281	6.231672002	5.967287828	5.881259981	6.244079082	5.713545016	5.968474738	6.23071777	5.59754911	6.132027161	6.141481613	5.965266428	6.235615987
BC100451	7.342624089	7.490038905	7.417705745	6.669359025	7.252004181	7.817068767	7.434934208	8.116955796	7.353568394	6.641088992	7.095556711	7.161881844
Bcam	7.01884317	6.875319131	6.774368262	6.778932022	6.806890549	7.23691489	7.186725653	7.278322713	6.946481399	6.659981098	6.811121203	6.714960383
Bcap29	9.106993564	9.180287307	9.12483661	8.930419435	9.256653455	9.181865422	9.48712511	9.640987751	9.554881379	9.556375669	9.306566678	9.347121213
Bcap31	10.42372454	10.4061049	10.43418324	10.34440755	10.40604426	10.48867027	10.64562655	10.38845348	10.51820356	10.4531972	10.26816258	10.61511133
Bcar1	7.219320824	7.674284573	7.145265017	7.232081047	8.632443047	8.857408423	8.9946449	9.024212837	7.725190757	7.045261632	7.437044711	7.320660744
Bcar3	9.611536386	10.04378335	9.628380294	9.690278551	11.08797402	11.38859414	11.66105025	11.31708913	10.3835948	9.650727725	9.793674667	10.07573753
Bcas2	9.062303204	9.045680484	9.040564579	8.972511447	9.067056916	9.063671863	8.91722369	9.112637257	9.028536199	9.048543973	9.20010805	9.072747616
Bcas3	9.440902738	9.398058844	9.436121838	9.383762378	9.361556055	9.521179394	9.39809214	9.202702657	9.258004621	9.141225177	9.226249437	9.473998379
Bcas3os1	6.552839269	6.556554643	6.541588549	6.77124256	6.427230152	6.288024924	6.202444815	5.72886863	6.34322052	6.478710374	6.579256578	6.823178751
Bcat2	10.13371501	10.11737317	10.30979493	10.22001545	10.02229154	10.01865084	9.666131904	9.934339554	10.09381773	10.11380027	10.27389745	10.09546928
Bccip	7.870846057	7.666699339	7.730521464	7.658896422	7.712012786	7.648441197	7.873209301	7.591818629	7.957978159	8.225696465	7.937106237	8.290121952
Bcdin3d	5.843785247	5.894793675	5.992588195	5.940858896	5.804007347	5.691115462	5.889390524	5.702371653	5.910744758	5.972628213	5.676558632	5.915306802
Bckdha	7.824403536	7.54710461	7.662681625	7.801673004	7.868774494	7.937660474	7.86366977	7.950641564	7.448994518	7.657407464	7.615821153	7.38985798
Bckdhb	6.845752702	6.856686828	6.828428177	7.079823305	6.723817548	6.630427736	6.802439276	6.654645359	6.948367082	7.030822767	6.887069878	6.783468667
Bckdk	9.388257741	9.413680285	9.364596443	9.484533229	9.448375896	9.381301735	9.482778477	9.601615816	9.603344003	9.64499562	9.592602721	9.353828595
Bcl10	10.21135694	10.0991779	10.23061624	10.22769538	9.95118426	9.659044841	9.694273959	9.541224472	9.861609271	10.26592773	10.09926027	10.25523062
Bcl2	8.256710513	8.251609201	8.400182964	8.710472657	7.853683767	7.619879687	7.848298674	7.5189332	8.306933807	8.5458392	8.168846449	8.187922229
Bcl2a1a	6.942772726	6.950444499	7.09535731	7.238053401	6.756558001	7.227383338	6.967776421	6.602060512	7.362448496	6.883951385	6.998645492	7.22166531
Bcl2a1b	6.713580657	6.470993874	6.197809765	6.483699418	6.279661154	6.722858349	6.995237494	6.326099389	6.564488413	6.363878	6.364682965	6.747931416
Bcl2a1d	6.84695104	7.041133133	7.037955513	7.109656757	6.404949973	6.272427023	6.131639872	5.829058206	6.553899025	6.492239882	6.636204652	6.867085075
Bcl2l1	10.10473061	10.08808705	10.25056586	10.30321959	9.161500964	8.989234527	9.091384474	9.063234107	9.946050103	10.13496009	9.870331343	9.845827975
Bcl2l11	11.74474796	11.6852184	11.56691511	11.89211537	11.90464864	11.5599225	11.7052885	11.51374975	11.35922554	11.76348124	11.73641853	11.60275702
Bcl2l13	9.648042885	9.870625798	9.728278777	9.82204906	10.32940333	10.44129736	10.49069176	10.32670591	10.03115541	9.696678462	9.789631089	9.859846652
Bcl2l2	8.461461074	8.394547793	8.344146534	8.313445928	8.413252325	8.457573627	8.607658325	8.559111181	8.196697159	8.219289139	8.119605699	8.198853451
Bcl3	8.737201584	8.880953422	8.653082517	8.793465342	8.857629382	8.464243969	8.519604189	8.701104547	8.564320742	8.813954318	8.986465003	8.66458182
Bcl6	9.260089917	9.063858119	9.282764579	9.326421464	8.399472069	8.386503878	8.438627623	8.515890413	9.06978009	9.278980079	9.007949873	8.887030199
Bcl7a	6.66518922	6.126740105	6.463884724	6.65021816	6.859864534	6.695486344	6.656100986	6.922463398	6.522137965	7.22496527	6.927206009	6.47451016
Bcl7b	8.783400852	8.619721778	8.680884824	8.539262209	8.573832886	8.717210885	8.626867035	8.664209006	8.580075202	8.600376277	8.629557082	8.733837725
Bcl7c	6.940958895	6.785390067	6.959591653	7.189866203	7.019752301	6.83065349	6.932799367	6.786643967	6.788576813	7.133244452	6.85689699	6.772777839
Bcl9	8.11650874	7.992732145	8.186477858	8.102892193	7.279280394	6.953278612	6.897172991	7.069631487	7.496569747	7.946348125	7.808708032	7.719835201
Bcl9l	8.17579031	7.997863159	7.975132919	8.057947285	8.01828545	8.232830905	8.19379013	8.186377104	7.786885982	7.750267677	7.812038693	7.736637353
Bclaf1	11.13317215	11.15056732	11.07919371	11.21861537	11.25136942	11.11519281	11.22921046	11.19491914	11.19385056	11.31263199	11.26998795	11.16485762
Bcor	9.831647639	10.07822394	9.850160095	9.893658343	10.2569735	10.2760094	10.26306153	10.2601962	9.87892349	9.613311293	9.854323005	9.813690083
Bcorl1	7.458696659	7.429050933	7.431556428	7.600095294	7.225161758	7.444965693	7.245699952	6.908508873	7.185888282	6.995730073	7.192490319	7.361142533
Bcr	7.99007957	8.411980225	7.82543792	7.816007982	9.183068631	9.766358975	9.729562631	9.584914046	8.27325662	7.268065621	7.89140427	8.045482793
Bcs1l	7.203182845	7.293452993	7.148171993	7.075928115	7.258652937	7.096099076	7.122156229	7.265469804	6.984845618	7.057129331	7.176353178	7.10528348
Bdh1	9.432871754	9.981680534	9.225249869	9.198107068	10.75491371	11.33855499	11.70703307	11.2892551	10.02027221	8.887822146	9.275774731	9.720695499
Bdh2	7.358754732	7.712327352	7.254475169	6.856442213	8.586159774	8.941267277	9.355382946	8.960084296	7.651781843	6.943101718	6.986838233	7.780169839
Bdp1	10.10295559	10.09054605	10.09301813	10.08375112	10.13230229	10.05883832	10.17335612	10.10454976	10.11329094	10.19916446	10.08217457	10.16024795
BE692007	7.031001381	6.625827753	7.011975168	6.949925432	6.407632871	6.1574446	5.997731486	5.837995466	6.29650414	6.95186604	6.725431739	6.947217495
Becn1	9.504483446	9.384147594	9.479580726	9.553985607	9.388726091	9.44623189	9.340499589	9.219485833	9.339790641	9.402620695	9.412919863	9.459528739
Bend3	8.283384461	8.142822091	7.891257117	8.33885837	8.553825408	8.705683354	8.60881915	8.651784774	8.102689952	8.091394377	8.439823555	7.949256678
Bend4	7.970494604	8.17222255	8.043630049	7.924184919	8.603342026	8.873149629	8.694902031	8.746919269	8.210924869	7.739389321	8.046229419	8.113657311
Best1	8.378564835	7.918792974	8.372576275	7.976555746	7.487833488	7.342242305	7.228903175	7.449401927	7.579775832	8.185138877	7.844694705	8.020216482
Bet1	8.253000912	8.237405244	8.205404987	8.051229957	8.575354045	8.817519298	8.926172639	8.892542808	8.554291845	8.327722259	8.251069174	8.438874036
Bet1l	7.800187332	8.034668684	7.867015381	8.040474775	8.025005482	7.856006547	7.903768906	7.629941928	7.809412036	7.743929619	7.863820564	7.964188147
Bfar	8.749234129	8.968934311	8.828206928	8.805479408	9.268320607	9.574539772	9.407890544	9.340176497	9.006579515	8.480660169	8.788036779	8.878478346
Bhlha15	6.527455477	6.237106275	6.280803062	6.412745433	5.859288057	5.931976649	5.926802898	5.953383707	6.072685451	6.290346061	6.251823025	6.093299845
Bhlhe40	12.57917642	12.88782274	12.64442181	12.7651584	13.20420612	13.0482123	12.9165876	12.84692865	12.7383984	12.5857459	12.96077153	12.90969389
Bhlhe41	10.28361433	10.29543848	10.06415195	10.30845675	9.236767036	8.670765907	9.105569783	9.067435323	9.885261171	10.43943815	10.23592081	10.02975046
Bicd2	10.38211903	10.3073818	10.46259615	10.42335773	10.14174485	10.11849539	10.04083067	9.990521175	10.34410362	10.44209031	10.36454068	10.4540886
Bid	8.862184646	8.618506257	8.810291971	8.821577163	8.341852006	7.957616602	8.154774662	8.431745081	8.659196653	9.287110447	8.898166673	8.609911062
Bin1	10.43568345	10.44809942	10.44364678	10.42037105	9.705177112	9.079735364	9.160213566	9.378115713	9.851166606	10.46419238	10.38816682	10.19354041
Bin2	9.315065032	9.112822784	9.160576741	9.118878063	8.2805724	7.875001219	7.96727546	8.041482357	8.580863794	9.188677223	9.048649025	9.016140805
Bin3	9.558015304	9.276205626	9.46027898	9.672173951	9.147378577	9.110288027	9.196896023	8.91276874	9.366937169	9.685837396	9.415156047	9.487388359
Birc2	9.697659851	9.687311318	9.656342513	9.794617658	10.45329248	10.22028849	10.12936323	10.32332244	9.565190227	9.808542745	9.930436812	9.59820246
Birc3	11.45624049	11.53262473	11.59732805	11.70638001	11.55203668	11.23647209	11.23384263	11.21891408	11.48213277	11.72131312	11.65923926	11.56511584
Birc5	7.6325744	7.910651332	8.212503176	8.162410325	7.692501628	6.822354445	6.922814297	7.031084118	8.286071626	8.878141877	8.47583018	8.41765321
Birc6	12.79518528	12.92456761	12.87071738	13.04658944	12.88843113	12.90907855	12.87566035	12.81212194	12.94912631	12.79909656	12.886365	12.77403135
Bivm	7.707843909	7.756811017	7.777488383	7.814504156	8.107163107	8.256084784	8.243223481	8.163638057	7.999981563	7.802092778	7.794276715	7.836846365
Blcap	9.572297375	9.494883385	9.403732645	9.323390873	9.594004396	9.800886678	9.923960515	9.689139885	9.401193705	9.271725413	9.239802317	9.554964718
Blm	7.937088249	8.003684223	8.22783648	8.20943486	7.766186704	7.062408411	7.16153762	7.655471267	8.061570433	8.698752752	8.375471286	7.89993926
Blmh	8.68126616	8.727468372	8.854409058	8.706821043	8.364183555	8.185355071	8.227201341	8.457092789	8.932853375	9.065479647	8.89669269	8.814389258
Blnk	9.86099031	10.02660273	9.775817109	9.966861986	9.047649407	8.60404827	8.953897908	8.787329175	9.751021966	10.02901069	9.929946667	9.905470522
Bloc1s2	6.489351326	6.687192494	6.444981355	6.327684992	6.421579368	6.547197216	6.410939872	6.625658882	6.617776357	6.294317342	6.672785825	6.575363177
Bloc1s2-ps	6.228422168	6.232541068	6.424598075	6.064168368	6.615891513	6.361118083	6.474856411	6.53462985	6.373923005	6.624577535	6.318782201	6.619438468
Bloc1s3	7.897142331	7.78212225	7.804603922	7.96078478	7.811321271	8.224454813	7.875922267	7.782873331	7.78239896	7.484285499	7.810336373	7.747204452
Bloc1s4	7.446598079	7.395365956	7.529183193	7.298742175	7.399002513	7.658005428	7.384531461	7.700063015	7.514349929	7.306579137	7.446235867	7.361145331
Bloc1s5	7.312836196	7.362946308	7.221002871	7.238878132	7.567302967	7.783587987	7.930999682	7.845335767	7.672308631	7.4059135	7.400445242	7.468233895
Bloc1s6	8.930748319	8.954970782	8.82479656	8.86546795	9.090839463	9.134192481	9.373205118	9.164781438	8.936018164	8.868442682	8.759604269	8.927356557
Blvra	9.734173925	9.585832125	9.787932666	9.735776084	9.487050623	9.544580142	9.585588122	9.205877547	9.577796949	9.668609229	9.425500709	9.857367865
Blvrb	11.17672699	10.99062951	11.12848482	11.06429206	10.4070459	10.09931582	10.29606844	10.16393116	10.6230897	11.11691727	10.78230933	10.97863937
Blzf1	8.080040954	8.033507568	7.88916456	7.990040066	7.987465641	8.054812727	8.253789628	7.944774728	8.023736666	8.002922965	7.948289072	8.156428466
Bmf	8.362398232	8.665524687	8.499279796	8.326131114	9.366326825	9.211789389	9.148940595	9.662176648	8.545360967	8.396771947	8.625865633	8.285778262
Bmi1	8.852799857	8.945932352	8.820059733	8.857964716	9.092002681	8.908339054	9.20771292	8.977470293	8.981819276	9.072350408	8.898849162	9.091186806
Bmp2	9.306617685	9.229491006	9.420942255	9.130221973	8.661034387	8.382174221	8.058602735	8.060868222	8.718125302	9.074112147	9.206232383	9.494687178
Bmp2k	10.41473758	10.32990506	10.31577221	10.38937332	10.18360493	10.35276882	10.31064705	9.960457816	10.09703417	10.01270281	10.06895743	10.34554554
Bmpr1a	7.008782446	6.480103918	6.914707242	6.765827241	7.19120337	6.99183489	7.071397324	7.1065109	6.612756584	7.340803592	6.826637835	6.940404259
Bmpr2	11.17912929	11.28710954	11.07517153	11.16267836	10.96015635	11.13243063	11.23557314	10.90605985	11.11562157	10.83536704	10.94416254	11.186169
Bms1	9.478026533	9.439442373	9.461379165	9.640735625	9.461534305	9.37836106	9.368750081	9.362820922	9.556653073	9.678410478	9.666084665	9.492657364
Bmt2	10.29923405	10.46151761	10.37207285	10.47978841	9.818947874	9.737678983	9.834439199	9.624662071	10.44693947	10.3659248	10.35860935	10.46067092
Bnip1	7.86518093	8.182792975	8.013995967	8.080710585	7.858585071	7.646010463	7.640741657	7.600160509	7.905398815	7.800361377	7.974427192	7.948293722
Bnip2	10.70931454	10.69239682	10.7033343	10.74563674	10.98871789	11.15610221	11.13649963	10.90941009	10.76210841	10.6116418	10.62030691	10.80509401
Bnip3	6.948124816	7.035660315	6.955525695	7.152779748	7.505212365	7.725840585	7.559583285	7.237945743	7.02596009	6.717796371	6.964188291	7.088571781
Bnip3l	9.945788767	9.934159086	9.774179533	9.979516026	9.963417718	10.24041483	10.35845364	10.01833403	9.964502273	9.699134837	9.741075584	9.875858698
Bnip3l-ps	7.999870523	7.782316254	7.845867371	7.928149293	7.779128177	8.160679248	8.160705823	7.839649091	7.766671013	7.602674211	7.539096518	7.777871328
Boc	6.634437248	6.763974946	6.47242663	6.378188024	7.859359763	8.048166799	8.285229463	8.302443849	6.769137045	6.450792311	6.505277963	6.582302183
Bod1	7.829676645	7.83242424	7.819588819	7.762453391	8.182211464	8.406438447	8.262928832	8.406449375	7.887421619	7.66044704	7.816792077	7.730406961
Bod1l	10.36347459	10.15646195	10.14339992	10.10489254	9.967661044	9.940830042	10.07160518	10.12770337	9.997118164	10.23096181	10.1132487	10.09565789
Bola1	6.379430284	6.071808829	6.54731957	5.69878133	6.278203788	6.345272232	5.904734211	6.450955126	6.12944674	6.369999751	6.33502703	6.637344356
Bola2	8.195890731	8.022276408	8.154875782	8.385111843	7.818832065	8.164256257	7.849238303	7.51766811	8.204454905	8.032645036	8.215063616	8.316397749
Bola3	7.833659052	8.078255421	7.75758086	7.784834514	8.478543326	8.475712025	8.697957987	8.419150143	8.04486414	7.803099073	7.901527671	8.153081861
Bop1	9.397143328	9.305885419	9.451892884	9.643183903	9.355698161	9.375560561	9.291097327	9.515212423	9.563620467	9.635015977	9.573471746	9.158065631
Bora	7.601644019	7.672166711	7.696464845	7.640337506	7.802818134	7.217354582	7.162699124	7.837313882	7.584723248	8.099664108	8.130021431	7.511534012
Borcs5	6.773033689	6.859543875	6.804314908	6.798096576	7.093925265	7.187944315	7.115941778	6.888283473	6.906950567	6.726421331	6.853652836	7.087529471
Borcs6	7.938061241	7.820859935	7.67736626	7.971552762	7.744682345	8.107798205	8.126621342	7.666593415	7.697782725	7.451868171	7.576538709	7.742380133
Borcs7	6.986991521	6.77215607	7.065573195	7.520754909	6.914004854	7.052874372	6.943834416	6.625390723	7.019100575	7.095066507	6.910689338	6.773951318
Borcs8	7.526430536	7.346204494	7.442411133	7.492885311	7.333302625	7.527464922	7.566619663	7.523137417	7.393353332	7.379417077	7.244055697	7.237063765
Bpgm	6.92166895	6.540630068	6.906143146	6.839606325	6.552886516	6.631372231	6.491116166	6.432731034	6.67970017	6.982253338	6.756996325	6.881918278
Bphl	7.77887201	7.584194507	7.665912676	7.729308787	7.437053982	7.533237822	7.698825487	7.352469161	7.652870657	7.751364321	7.504058486	7.787018702
Bpnt1	8.564762622	8.519684051	8.440535994	8.342891254	8.820898003	9.00105531	9.184879579	9.228419794	8.871631608	8.736552873	8.631876661	8.685981185
Bptf	11.18561856	11.07876018	11.09674201	11.21341012	11.05904663	11.11181205	10.97571026	10.9886831	10.93242168	10.98651463	11.1046346	10.97499364
Braf	10.30925414	10.40903112	10.18317391	10.53076205	10.4345441	10.55939698	10.75472739	10.22893062	10.3158456	10.09121574	10.12174255	10.29995117
Brap	10.37703017	10.4009198	10.3266241	10.38057272	10.63851642	10.96561361	10.84226067	10.90088323	10.5317762	10.18078937	10.37843802	10.26586683
Brat1	8.091453639	8.170668818	8.173216553	8.185180116	8.355546949	8.324323535	8.232310893	8.235832551	8.061756714	8.013764948	8.103229857	8.087744635
Brca1	9.192088344	9.646110739	9.593049021	9.693542719	9.461644982	8.856600486	8.902009235	9.333574744	9.892250021	10.04327212	10.05092509	9.518865884
Brca2	7.83485875	7.912887203	8.054813964	8.124584487	7.879592728	7.237824641	7.333428915	7.571926897	8.152821614	8.716561247	8.479030213	8.170761707
Brcc3	8.665974005	8.674558652	8.603266371	8.41909983	8.651168703	8.525795857	8.522884453	8.554720005	8.650796866	8.767585065	8.84178875	8.994119738
Brd1	10.69698082	10.61665711	10.57604759	10.59148588	10.53152149	10.58464634	10.36082898	10.59660491	10.33121732	10.35841616	10.62284306	10.37162883
Brd2	12.78924564	12.79371516	12.5141604	12.82721701	13.09426149	13.36325509	13.23533596	12.81928044	12.528273	12.25480988	12.66228376	12.76528267
Brd3	8.97089826	8.848701566	8.934465604	8.785865627	9.189697413	9.003746824	9.036954412	9.257120793	8.837338483	9.145485765	9.026514139	8.954947735
Brd4	10.98924425	10.90472464	10.76321441	11.0262307	10.75180829	10.86737446	10.70445762	10.73625598	10.62282081	10.59177425	10.89620132	10.60138667
Brd7	10.29295608	10.21452069	9.994152537	10.03231341	10.1578824	10.29068275	10.30197745	10.15665396	10.11843498	10.06407003	10.27314348	10.3803061
Brd8	9.904645792	9.80688488	9.866917844	9.869923051	9.782134579	9.641095387	9.587270419	9.947548529	9.745144919	9.983945024	9.977737027	9.61445371
Brd9	8.899102084	8.861586103	8.809298285	8.824812106	8.944091362	8.664021836	8.762695478	8.822465504	8.661948672	8.979534178	8.933148355	8.857864508
Brdt	6.05233658	6.152944098	6.081061579	5.866481016	5.821202587	6.036504749	5.789058133	6.165932689	6.074266892	5.758357211	6.077686347	5.915392352
Bre	8.749120628	8.737757003	8.655602302	8.865751898	8.861000756	8.796580952	9.028925357	8.845701303	8.613553635	8.689337064	8.53914736	8.512221818
Brf1	8.993738582	8.91273656	8.881412973	8.898776428	9.044013702	8.989548519	8.889060502	9.194163841	8.686199441	8.821666647	8.953478251	8.631011456
Brf2	7.002183761	6.988729947	6.99306677	6.989559407	6.912883504	6.809966795	6.83034438	7.039125562	7.03051707	7.146887592	7.122173184	6.916899365
Bri3	10.26662752	10.03073958	10.30587869	10.22417686	9.539312358	9.527081951	9.321535712	9.393489682	9.988568887	10.23668724	10.16709436	10.17684222
Bri3bp	9.038752681	9.131204557	9.040713616	9.009019289	9.475621558	9.512560029	9.664947759	9.777264564	9.390034721	9.260644373	9.198747585	9.118125107
Brip1	7.539158503	7.946924039	8.105432725	8.178302621	7.837083778	6.977767575	7.169587632	7.277933866	8.324039805	8.775590472	8.425261729	8.244045599
Brip1os	9.901885274	10.16146614	10.14300788	9.994980785	10.47705147	10.51179064	10.49005569	10.58324994	10.41654908	10.12222906	10.16242226	10.21725511
Brix1	8.506282306	8.639325122	8.3628115	8.484693357	8.840562984	8.521084653	8.791302688	8.665719809	8.529343782	8.715779298	8.722074885	8.725775907
Brk1	10.24843084	10.11785795	10.28862628	10.23635348	10.09671992	10.08584281	10.14583853	9.992370029	10.31234656	10.45379655	10.2230325	10.42877381
Brms1	9.235826651	9.168451964	9.25149919	9.376568996	9.172853071	9.239712555	9.302703913	9.131007653	9.332009647	9.33252485	9.186486267	9.23311272
Brms1l	6.956192359	6.987096085	6.875200886	7.027428825	7.025737497	6.856470313	7.021714631	7.061766926	7.139323998	7.277687457	7.224338336	7.032058102
Brox	10.00454923	10.12999029	10.17771966	10.02089594	9.851380588	9.811230856	9.839382038	9.913459877	10.17413882	10.08884748	10.01296693	10.09571281
Brpf1	10.45036358	10.47979189	10.46674741	10.56749661	10.26477742	10.23639946	10.12070112	10.27698925	10.35030502	10.34925467	10.47799749	10.22096016
Brpf3	9.015846435	8.932516102	8.935973193	8.988821241	9.108083156	9.10765134	9.10649318	9.152866319	8.776446298	8.860208447	8.857909516	8.75868833
Brsk2	6.708639057	6.832994844	6.920971273	6.619315747	6.361902797	6.203046064	6.264683794	6.351529774	6.86216355	6.896664496	6.747050337	6.961859882
Brwd1	10.38421571	10.41201302	10.31446143	10.2739746	10.40040206	10.42898765	10.391594	10.52063819	10.21868399	10.16230108	10.29724632	10.20868898
Brwd3	8.849257649	8.621797507	8.815756838	8.870201393	8.874830757	9.022630456	8.900254053	8.804362949	8.75405323	8.833713673	8.762130745	8.803577295
Bscl2	9.318691724	9.182149478	9.406830799	9.473753527	9.021654333	9.169149265	9.087370614	8.868895593	9.246557766	9.235605081	9.092702411	9.244254704
Bsdc1	9.477106097	9.493764291	9.362082552	9.323291579	9.707991668	9.86750388	9.881049833	9.775141564	9.516261655	9.340091249	9.458227034	9.602926278
Bsg	10.81530304	10.89055437	10.89967563	10.77418682	11.20460158	11.41875079	11.49523429	11.45726627	11.11757551	10.82817497	10.74257022	10.90602704
Bsn	7.133064938	7.011640962	6.742325738	6.905600006	6.132677144	5.86272772	6.22891036	6.026832698	6.791417695	7.182791095	7.085923679	7.124727074
Bst1	8.675277349	8.831262006	8.89587098	8.655489432	7.820869455	7.279496569	7.772619024	7.842115465	8.747049712	9.132437941	8.574706511	8.745591618
Bst2	10.30951521	9.991955501	10.20875835	10.09682987	9.176231028	8.630420206	8.781366034	8.705184069	9.473815829	10.33718636	9.969437688	10.15754813
Btaf1	11.00746673	10.9749674	10.99160878	11.26078378	10.78384071	10.79280255	10.76756497	10.66152951	10.92941864	10.95295612	10.96155233	10.79841278
Btbd1	8.935819209	8.914779829	8.783698291	8.76949672	9.196804502	9.307395898	9.390358449	9.087661306	8.782474688	8.692922672	8.741041658	9.057940372
Btbd10	8.544588176	8.589481573	8.728381112	8.624234925	8.679098015	8.751555789	8.571695268	8.423970341	8.835904795	8.718553623	8.759514606	9.011385719
Btbd11	8.314915657	8.763855165	8.685176952	8.391025104	9.296286101	9.272690256	9.080297615	9.738336545	9.100406152	8.675062489	8.946133343	8.582246261
Btbd19	7.587108939	7.410329903	7.262654641	7.744498908	7.310039892	7.376208981	7.421061971	6.803640047	7.123144379	7.233754327	7.336576599	7.472154255
Btbd2	8.671209838	8.690161672	8.636048987	8.795793488	8.648286572	8.844266397	8.865696384	8.564968753	8.514945612	8.300013953	8.332696651	8.473679781
Btbd3	6.574416306	6.630103464	6.651468257	6.263166493	6.500001915	6.849003716	7.045851357	7.132989455	6.977902102	6.573213143	6.355000709	6.656164375
Btbd6	7.72643597	7.75334415	7.760892771	7.617877599	7.872982646	8.189502667	7.978336428	8.227656698	7.859215554	7.515787353	7.71940497	7.613099873
Btbd7	9.286811979	9.119013952	9.128190555	9.329396795	9.376143243	9.537397808	9.500199874	9.368929455	9.219625054	9.226168517	9.254189847	9.184254026
Btbd9	9.78653461	9.770188602	9.73155146	9.934767817	9.818521424	9.924033732	9.82638992	9.819215366	9.743421858	9.654255558	9.790536513	9.594494709
Btd	7.219911586	7.161101981	7.426548841	7.406282819	7.0642477	7.115579738	7.066592883	7.067769956	7.401193361	7.408670928	7.192210922	7.211299872
Btf3	8.847994434	8.695967594	8.847245343	8.885227651	8.934188059	8.864943777	8.852267642	8.75753853	8.868881911	9.090153033	8.95155142	9.008298223
Btf3l4	7.450208172	7.696000503	7.456093898	7.210643019	7.960890329	7.779108734	8.042454007	8.142866536	7.629399831	7.565389095	7.541950427	7.686988777
Btg1	13.10333026	12.96969782	12.99255587	12.95990073	12.52913289	12.09857908	12.07544043	11.95055691	12.40391349	12.96809975	12.96838035	13.125919
Btg2	11.05881005	10.56010466	11.02500335	10.64967366	9.911933558	9.557197658	9.0607257	9.912828871	9.87995602	10.73339731	10.76497058	10.28819711
Btg3	5.777543638	5.926331632	5.635456247	5.638635735	5.645833257	5.871015963	5.862439708	5.805451736	5.786480423	5.412509724	5.711961363	5.765769848
Btk	10.25866334	10.13131583	10.16062687	10.15052399	10.32856964	10.47661318	10.45014584	10.44292578	10.2325322	10.21183617	10.20899247	10.22631541
Btrc	8.019376847	8.083114334	8.097137752	8.18413868	8.109039397	8.187300675	8.172966648	8.036140443	8.12554223	7.983543464	7.983854073	8.03367935
Bub1	8.491957436	8.715563795	8.917084962	8.917593046	8.627598678	7.846453049	7.796596779	8.369655322	9.115522337	9.673061607	9.521396709	8.947830083
Bub1b	9.021524638	9.404184757	9.623300063	9.335923012	9.215534713	8.404581599	8.433683873	9.008224892	9.730399616	10.15869261	9.910475032	9.623311065
Bub3	9.842662826	9.874651739	9.98791081	9.807366925	9.787221751	9.580532014	9.691505353	9.963982981	10.19212638	10.3668272	10.1425948	10.05066105
Bud13	7.41413553	7.45422259	7.582544086	7.526761296	7.387508536	7.151853138	7.251096076	7.336174626	7.450414213	7.64598255	7.418418117	7.389122356
Bud31	8.814219291	8.612314752	8.466433566	8.692913632	8.775641414	8.960495866	9.212139355	8.689217947	8.572442231	8.589492319	8.483730015	8.780171357
Bysl	8.034094888	7.975744421	8.166019472	8.496517824	7.877253697	8.060402991	8.00236822	7.866225677	8.53880988	8.414011052	8.281770773	8.087414965
Bzrap1	8.230336598	8.650718167	8.093954244	8.321941945	9.004712605	9.335017735	9.334510104	8.951035667	8.225390418	7.474703719	8.031975273	8.18746201
Bzw1	11.56120301	11.70143762	11.62585475	11.64692158	11.90752709	11.84746821	12.00621581	11.85862773	11.93523933	11.85506359	11.77189886	11.89842011
Bzw2	8.425413199	8.674758196	8.733106684	8.678046404	9.312796597	9.091036487	9.026529807	9.265327111	8.910590005	8.883005118	8.889163311	8.705426286
C030005K06Rik	6.839144125	6.971994241	6.696397261	7.077607843	6.576590111	6.148824489	6.300115429	6.284769323	6.404800343	6.699715849	6.824021887	6.458157412
C030013C21Rik	5.493394044	5.669633208	5.319502437	5.926828269	6.520918828	7.066566722	7.14282756	6.522414685	5.887681221	5.165794163	5.439664096	5.452751139
C030013D06Rik	6.162039305	5.701730139	6.176314754	5.728743262	6.062054263	5.784589882	5.644965993	6.517552881	5.716908103	6.454681649	6.119720924	5.694705528
C030015A19Rik	6.318548807	6.717915607	6.579335577	6.394839488	6.323478366	6.599035923	6.080575961	6.588736121	6.480384608	5.805460252	6.462500244	6.138836172
C030017G13Rik	6.426885806	6.658532497	6.30999116	6.456786088	6.596058101	6.59410259	6.571012305	6.655957619	6.453518831	6.223827651	6.595459272	6.36371903
C030034I22Rik	6.411050783	6.111374497	5.909644816	6.126221108	6.311020008	6.720729177	6.726499058	6.553184735	5.91563651	5.805603626	6.001563426	5.958301457
C130023A14Rik	6.924849556	6.684492125	6.836236433	6.872403642	6.930709173	6.637026573	6.627745969	6.66168537	6.731602999	7.26564303	7.123179327	7.053072717
C130050O18Rik	7.706814493	7.612276109	7.600208471	7.772518557	8.071354581	8.13859579	8.023703501	8.332715699	7.596562374	7.623859549	7.750819476	7.269497192
C130083A15Rik	7.306235071	7.647227741	7.477267146	7.502801528	7.232688776	6.973116681	6.78181067	7.07292818	7.518380535	7.436959961	7.798226567	7.481574675
C130089K02Rik	6.46831068	6.878043567	6.648181663	7.009190792	7.161690973	7.194059125	7.260318229	6.992928172	6.861889811	6.419788771	6.583391571	6.489772499
C1d	8.607295928	8.537175838	8.620425268	8.329382512	8.876871566	8.822651063	9.036321771	8.948947143	8.755111287	8.879451881	8.582531743	8.960949127
C1galt1	9.779449722	9.946254397	9.904948697	9.954949817	9.866466674	10.06419224	10.19185527	9.866043244	10.30252633	9.93799609	9.85163876	10.12744967
C1galt1c1	7.614842362	7.510984863	7.663261166	7.754978862	7.770523314	8.069163153	8.007384709	7.473241238	7.855055151	7.660272811	7.569774951	8.012200727
C1qa	11.52138547	11.48492378	11.64701131	11.50631316	11.14798614	10.24002414	10.5915092	10.84870667	10.68776432	11.632188	11.11861541	11.0021161
C1qb	12.92235476	12.82296839	13.04045787	12.99602391	12.21374663	11.33060211	11.68152018	11.69190978	12.06535409	13.04788499	12.47947743	12.51352179
C1qbp	9.756980945	9.999005391	9.875558876	9.900212603	10.38422353	10.3814303	10.45201865	10.61122203	10.27238131	10.0331501	10.08600826	9.902151153
C1qc	11.81535862	11.80858761	11.69869314	11.62385453	10.95645165	10.35734728	10.53225787	10.55061181	11.19261059	11.79848596	11.73346985	11.78995452
C1qtnf6	5.938024876	5.902620541	6.274742185	6.346672597	5.865701777	5.89451009	5.86961162	5.678838977	6.008505617	6.015101639	5.667878465	5.786720696
C230096K16Rik	6.432061274	6.369191322	6.086263402	6.301179652	6.60584076	6.505674444	5.99153901	6.330497564	5.542337763	5.705374031	6.502437384	5.948562581
C2cd2	7.677303148	7.924522946	7.789889743	7.778058192	8.072506163	8.230205519	8.237993515	8.235119728	8.044722919	7.639803764	7.766648972	7.78135431
C2cd2l	9.090304779	8.852545503	8.902923376	9.239767893	8.576898337	8.731199804	8.864274257	8.423967619	8.925143812	9.008601622	8.825149296	8.928611417
C2cd3	8.916020667	8.852131639	8.993808975	8.945597667	8.538333341	8.39204087	8.413631286	8.433276467	8.840041904	9.050223403	8.886955652	8.915521778
C2cd5	9.064615135	8.920345513	9.182204838	8.879420058	8.640590408	8.587614873	8.431433311	9.032593953	9.002186705	9.199431864	9.0937541	8.795378237
C3	13.28234112	13.52452411	13.59757203	13.58827579	12.28465272	11.59933953	11.46288355	11.8295115	12.85058052	13.29371073	13.35711878	12.99978707
C330006A16Rik	8.64096053	8.55782658	8.501430221	8.529412872	8.938411426	9.211375459	9.271242803	9.133805437	8.654380431	8.464550347	8.461079363	8.570534077
C330007P06Rik	9.5165093	9.530095027	9.480997567	9.519802459	9.429964434	9.311661918	9.36173194	9.273820958	9.376813791	9.48153058	9.480558018	9.529664108
C330018D20Rik	6.698507438	6.488250068	6.586782909	6.454245797	7.074800017	7.448262435	7.383244789	7.284735175	6.894229926	6.731024878	6.697509683	6.928556409
C330027C09Rik	9.113092896	9.175877325	9.387745255	8.995780699	9.44061751	9.136905581	8.695431936	9.689869137	9.400940517	9.641868017	9.871473732	9.269001087
C3ar1	12.33243581	12.36550735	12.48070869	12.35442315	11.33781504	10.92395071	11.31576305	11.22624256	12.35696006	12.73775284	12.23073917	12.44654519
C430019N01Rik	7.625939266	8.053450514	7.816589418	7.774713637	8.626153297	8.709531106	8.810493498	8.367858313	8.045726611	7.534837554	7.670736259	8.155247224
C430049B03Rik	5.976295818	5.901975302	5.923431924	5.70680082	5.805179574	5.215872889	5.484842474	5.711550383	5.579638714	6.243265915	5.952839707	5.942762902
C530043K16Rik	6.950311122	7.327527202	6.943061784	7.101925882	7.302712383	7.095370871	7.316871302	6.996764902	7.109846441	6.939971874	7.102936861	7.264179163
C5ar1	11.97487461	12.05449383	12.37331644	12.32438353	11.05707839	10.46200818	10.69365546	10.55394296	11.90583271	12.4212837	11.87081381	12.05945922
C5ar2	6.516785084	6.308900075	6.64999086	6.514358698	5.976010392	5.691377088	5.873783421	6.072864231	6.412830259	6.905348572	6.381851454	6.318402806
C730036E19Rik	5.26360255	5.555531231	5.459924688	5.287802108	6.67192141	6.44120388	6.204737638	6.2696868	5.240596697	5.179385546	5.511458331	5.618631749
C730045M19Rik	6.55398186	6.793516713	6.56613838	6.442703324	6.495116049	6.561709737	6.650685286	6.740131128	6.708513444	6.402384903	6.540787687	6.574776901
C77080	11.56094671	11.78192304	11.27317122	11.34707987	12.4579306	13.10375957	13.15495248	12.86877444	11.81196088	10.94515558	11.40271449	11.61498389
C78197	6.302687906	6.35478466	6.25639972	6.349757848	6.477409932	6.445453093	6.408183884	6.617540365	6.315995863	6.295855949	6.431510098	6.128795489
C87436	7.455017425	7.348782069	7.294776166	7.489598904	7.558985766	7.506406421	7.471110862	7.520949037	7.306004426	7.464819127	7.554120589	7.309459676
C920009B18Rik	9.178819811	9.269928328	9.300445158	9.531731263	8.596521584	8.21191747	8.210769128	8.20459655	8.971457812	9.264953409	9.235584922	9.010471395
Caap1	7.282285691	7.167310889	7.331535372	7.336052007	7.341631288	7.039472355	7.103654842	7.275141214	7.215925939	7.633059674	7.404652704	7.228649697
Cab39	11.6777468	11.57932525	11.64606127	11.56638684	11.71614859	11.89463721	11.87885294	11.82524129	11.80117449	11.72110741	11.67015567	11.80344175
Cab39l	9.146960142	9.167285256	9.176533082	8.887083447	9.225303188	9.304995797	9.408114438	9.452645893	9.344605233	9.244587511	9.132221044	9.377139224
Cabin1	10.83707391	10.78277085	10.81422671	10.83903555	10.85529272	10.83276431	10.64892487	10.87774103	10.65716486	10.73399633	10.8863799	10.6327549
Cables1	6.409319102	6.68293484	6.092164183	6.378626011	6.765731426	7.094759132	7.098565031	6.774348561	6.272366037	5.669722593	6.25668735	6.294441993
Cables2	8.021550527	8.246377704	8.024882331	7.982377647	8.255246188	8.266290896	8.208982608	8.43723078	7.993558156	7.757686271	8.036489931	7.850746444
Cacfd1	9.00033252	9.080945782	8.966058505	9.009253544	8.84897674	8.974553173	8.94018174	8.759456959	8.918105342	8.711915647	8.861174357	8.998704099
Cacna1a	7.994490691	7.924684264	7.840899313	7.811111306	7.407381644	7.155173022	7.56501884	7.111548287	7.433731846	7.755746894	7.429686028	7.912944588
Cacna1b	7.398478593	7.533250084	7.566876755	7.312159332	7.881042332	7.607629044	7.737898377	8.14383134	7.533673267	7.672315064	7.508419059	7.357203519
Cacna1d	6.807705727	7.097674016	7.29427503	6.935423132	6.260437715	6.053662827	6.015251853	6.431957915	7.1032462	7.020052799	6.861862759	6.804008595
Cacnb1	6.716000758	6.40846844	6.389550918	6.4501075	6.573697589	6.997903869	6.774678592	6.797251269	6.044204698	5.927530736	6.169673536	6.086544276
Cacnb2	6.23616096	6.637982237	6.343888353	6.266174619	7.35396117	7.578514463	7.805603937	7.585497545	6.728467877	6.102093307	6.169097717	6.466917843
Cactin	8.822864496	8.862299106	8.853015004	8.89038324	8.768454897	8.475631069	8.359758428	8.682451528	8.573609491	8.826998709	8.952155453	8.592094116
Cacul1	11.31582159	11.22218331	11.24478018	11.45347421	11.08345311	11.03110022	11.14791499	10.86708109	11.35410202	11.5000932	11.36068156	11.43282142
Cacybp	9.476361187	9.423265596	9.36385144	9.323616078	9.78211457	9.876298346	9.95005826	9.737849145	9.671558349	9.630470163	9.616124405	9.868568883
Cad	9.088634945	9.457763041	9.620202642	9.634288002	9.364423171	9.059341182	8.75699771	9.42168529	9.763588137	9.69954203	9.839445902	9.160672961
Cadm1	8.702550417	8.755703022	8.407278601	8.373297446	9.896066152	10.2797497	10.55247028	10.5070031	8.969419108	8.532582958	8.608286793	8.687735131
Calcoco1	9.20342362	9.113169758	9.174736779	9.059781034	8.921128632	8.876037216	8.784471474	8.731696739	8.646013063	8.78135834	8.811357062	8.979087542
Calcr	9.897657289	10.31742744	9.478300586	9.280319922	11.55031411	11.92525509	12.67944551	12.2186645	10.15058091	9.355869774	9.440806206	10.09956788
Calcrl	10.31586293	10.34361062	10.47607438	10.33880971	9.691156181	9.420284684	9.587386311	9.597093239	10.51125596	10.75437978	10.45481438	10.58237212
Calhm2	7.476600072	7.507783387	7.594799478	7.355551935	6.648368018	6.405167079	6.507507633	6.954369459	7.383448531	7.595466155	7.40610951	7.198495227
Calm1	13.27468771	13.27728991	13.29924628	13.34201586	13.38068726	13.60398728	13.66662338	13.42497785	13.61148046	13.38557823	13.30098576	13.49986171
Calm2	11.4339273	11.15326502	11.33232404	11.17638702	11.14868711	11.08891789	11.19803834	11.169461	11.3311533	11.6715848	11.38340533	11.56791969
Calm3	11.23314994	11.09061772	11.22758133	11.31225855	10.9803301	11.08250439	11.1059051	10.95217787	11.32542854	11.36578647	11.20542215	11.27447216
Calr	13.7786816	13.97273559	13.81884787	13.9565632	14.30144972	14.6434872	14.65429685	14.35909133	14.2647526	13.72866113	13.8717392	14.02922939
Calu	11.11976389	11.34373841	11.20572738	11.34265354	11.81589242	12.10991984	12.23908746	11.90497281	11.76181337	11.24381143	11.25265484	11.44984333
Camk1	10.11177919	9.838642444	10.05621224	10.13583429	9.600843904	9.758244174	9.70481365	9.431454335	9.829454187	9.945190661	9.781051391	9.974788656
Camk1d	10.65735762	10.77529383	10.83793181	10.76843285	9.821861185	9.110762699	9.179010974	9.653301609	10.28068191	10.87384418	10.74295793	10.33816625
Camk2a	7.439887674	7.767980758	7.333207662	7.206455631	8.325958006	8.621629676	8.730343521	8.633821473	7.711828339	7.088063585	7.414122836	7.637396915
Camk2d	10.9792389	10.85617965	10.98625127	11.09292552	10.84462551	10.99401894	10.95205384	10.95018267	11.19576283	11.16942864	11.08132214	10.97651905
Camk2g	8.929644502	8.76331266	8.7811457	8.802148671	8.651716709	8.739712772	8.650521715	8.795559175	8.784018987	8.862354766	8.933712783	8.767672352
Camkk2	10.27972688	10.41674222	10.43662494	10.20335339	9.541267244	9.119874666	9.129603532	9.567465465	10.16369572	10.44807296	10.41846137	10.21387099
Camkmt	6.177279498	6.116282499	6.145167582	5.975053809	5.963523235	5.714606353	6.031448388	5.636813245	5.760893083	6.070806965	5.725079847	6.289828763
Caml	8.136808387	8.002720136	8.085027979	7.812880288	8.008826734	8.31842268	8.326350457	8.310606314	8.197347314	8.02183962	7.931604	8.219495833
Camsap1	8.533096388	8.450641414	8.679437013	8.720253154	8.738672956	8.886244843	8.643413995	8.733353988	8.742074525	8.676957613	8.690992863	8.560236728
Camsap2	10.06026365	10.12488991	9.957322177	10.21288389	10.00879405	10.21140803	10.17400742	9.965149358	10.11285292	9.845612682	10.05058102	10.00387738
Camta1	7.518994503	7.371471562	7.376591947	7.349807426	6.984498272	6.828634273	6.99903203	7.229098314	7.179975313	7.483362254	7.30784411	7.104562348
Camta2	10.54542743	10.42255797	10.47779682	10.68178014	10.32277414	10.42863243	10.25058313	10.13818353	10.19860325	10.21561443	10.33842489	10.24684117
Cand1	10.70738025	10.83074833	10.75084021	10.8774932	11.0008082	11.06085649	10.9484035	10.96581583	10.99026731	10.80685094	10.99921205	10.85514673
Cant1	10.32996663	10.30867097	10.32503629	10.44555813	10.72646328	10.85797714	10.71497251	10.83833618	10.35188103	10.24166284	10.36830215	10.12441664
Canx	13.24861381	13.21881177	13.20616056	13.21786331	13.34270815	13.39411623	13.46457611	13.27200045	13.42397686	13.40237083	13.34456216	13.52543506
Cap1	13.27517646	13.35978508	13.36924218	13.42241738	13.2742192	13.36040197	13.421327	13.18536041	13.47279437	13.30200298	13.23162085	13.41441225
Capg	13.2040342	13.26089774	13.42664562	13.36543212	13.35732533	13.62742014	13.53200748	13.44070409	13.63679463	13.30983627	13.23950106	13.39201795
Capn1	10.01792624	9.908027203	10.06365196	10.2106052	9.443457992	9.694703246	9.464537197	9.194097132	9.896073309	9.754727088	9.829268378	9.952755202
Capn10	7.041473305	6.694951851	7.088426494	6.838395445	6.682510226	6.914091898	6.648289247	6.650519638	6.671354712	6.786294494	6.658622503	6.90642316
Capn15	8.344717407	8.194224133	8.240290831	8.529612967	8.117571441	8.273847505	8.227703446	8.060808199	8.065353967	8.059571177	8.059648538	7.93722165
Capn2	11.18918224	11.26953602	11.21420016	11.34175257	10.55382011	10.67260981	10.83060959	10.60364464	11.52426513	11.32512165	11.22245773	11.32187027
Capn5	8.724102449	8.99811587	8.771630714	8.715255053	8.581615284	8.715041468	8.849259984	9.010190602	9.038523059	8.631083454	8.723350094	8.618795137
Capn6	5.32660404	5.529227181	5.458313993	5.029874664	6.470124619	6.811619971	6.846891617	6.519598865	5.631496326	5.087377834	5.123019375	5.878751457
Capn7	9.793791265	9.819736471	9.851471404	9.793674457	10.06882726	10.15862969	10.10950599	10.02778994	9.91208663	9.796338998	9.813727762	9.953240755
Capns1	11.86073968	11.86110847	11.877088	11.90493999	11.69009528	11.72444163	11.84401616	11.58144737	11.88764571	11.85293056	11.7173765	11.9520933
Capns2	6.374794083	6.53792977	6.485611402	6.028653294	5.248300155	5.379405504	5.187531281	6.073008524	6.151207752	5.856966717	6.101159308	5.672640173
Caprin1	12.62594424	12.73154766	12.67747269	12.71261628	12.60742303	12.62425618	12.67063833	12.6687554	12.93688647	12.8144499	12.82214272	12.78888206
Caprin2	6.942392142	6.866441295	6.943679311	6.585465197	7.821433127	7.468353423	7.590085727	7.627981941	6.636288163	7.065318713	6.866348393	7.186666293
Capza1	10.18447427	10.34102576	10.26155079	10.11400822	10.41221753	10.35396374	10.40443886	10.39744512	10.48367146	10.38537377	10.41437363	10.56890993
Capza2	12.12307804	12.14943544	12.11936251	12.09239041	11.90127565	11.76917066	11.87324006	11.6710199	12.18719825	12.29294585	12.21894938	12.44814164
Capzb	12.20640359	12.05025027	12.12268951	12.16724516	12.07048355	12.46904083	12.40550907	12.16887983	12.2920137	12.04960974	12.04070225	12.23277584
Car13	9.193756559	9.272261696	9.279716742	9.295447801	8.941986741	8.698104956	8.95339484	8.531799336	9.377463202	9.54283985	9.280094921	9.685959365
Car2	10.3980747	10.81064328	10.13091648	9.869896219	12.17816661	12.53111096	13.12295613	12.79458275	10.67553518	9.910022251	9.997903875	10.58729752
Car5b	6.874205105	7.159614598	7.240168169	6.702521841	6.285853673	6.058252561	5.925244781	6.650091642	7.306872789	7.249064409	7.301518617	7.114318085
Car9	6.480593524	5.935384824	6.397416309	6.281595911	6.389661774	6.89270364	6.576756483	6.889128365	6.490337602	6.532504435	6.386420108	6.189868624
Card14	7.533980997	8.188458199	7.580649583	7.543956017	8.969076769	9.593938002	9.858072988	9.739733742	8.524591103	7.245252668	7.588926299	7.743959111
Card19	10.12534317	9.920930784	10.08293324	10.2089621	9.652835914	9.453171652	9.567818912	9.364798284	9.901074278	10.30515092	10.02850121	10.10549298
Card6	6.127122075	6.365296352	5.934553492	6.474865957	6.349991246	6.674533174	6.630950488	5.930334171	6.169916323	5.607200118	6.081525665	6.241829516
Card9	8.824280543	8.667722715	8.852855844	8.736456429	8.238201552	8.360998732	8.110747597	8.316544965	8.63364188	8.667402528	8.732520535	8.643122582
Carf	7.421975378	7.226593436	7.194821992	7.285449676	7.755693355	7.704747918	7.991026814	8.131001942	7.227427527	7.473754906	7.219247454	6.988644641
Carhsp1	9.183437597	9.154196251	9.289394502	9.242414197	8.771240115	8.697082003	8.691879645	8.816257317	9.171251444	9.274650903	9.144655009	9.067257643
Carkd	8.388897964	8.459419375	8.54645521	8.692359506	8.485041002	8.55319444	8.582550925	8.164567017	8.644306042	8.505631194	8.389238873	8.661318486
Carm1	8.765724302	8.862794666	8.684815389	8.785909322	8.709036279	8.67500559	8.567843477	8.752909737	8.732579289	8.669539613	8.954681003	8.668520811
Carnmt1	6.758439982	6.604975839	6.577499122	6.618600168	6.863168844	6.988695691	6.819713135	7.093949404	6.775942309	6.803879604	7.000338878	6.685001563
Cars	9.429753537	9.468702538	9.44928095	9.561276685	9.351024435	9.557089628	9.504667442	9.547556156	9.85388978	9.608875586	9.68071936	9.525834911
Cars2	8.101194052	8.069830058	8.157352063	8.287832513	8.063003283	8.154299827	8.044969608	8.059409676	8.22701888	8.16708633	8.188894544	8.043974026
Casc3	9.601644025	9.771611475	9.632670338	9.560773311	9.791847946	9.665643358	9.642795028	9.799673132	9.516673537	9.472910675	9.634700142	9.549719065
Casc5	8.625602137	8.90018688	9.066960945	8.759163883	8.660638741	7.659177443	7.874538497	8.976135656	9.209103188	9.935979742	9.553844623	8.760044527
Casd1	8.940083437	9.045555047	8.986257706	8.970781247	8.840566726	8.794925616	8.866360431	8.905326554	9.158631773	9.098801274	9.086663799	9.063174135
Cask	9.344968749	9.359971928	9.35999732	9.350479897	9.532426003	9.554359486	9.496894514	9.496601258	9.214998973	9.178062311	9.235501891	9.245312571
Caskin2	7.523320311	7.496616716	7.581288326	7.265201009	7.214591797	7.274205199	7.082723325	7.600383784	7.414822863	7.381913056	7.48872332	7.287150178
Casp1	9.669273324	9.688465972	9.756255566	9.569359768	9.050723718	8.650099387	8.817698521	8.765071255	9.533455379	9.914887061	9.679498333	9.919021397
Casp2	8.725408886	8.643267308	8.775687546	8.577057258	8.515907155	8.294319794	8.12381271	8.620970272	8.715449689	9.019178628	9.057265473	8.758738199
Casp3	9.227105587	9.234191341	9.281209588	9.244459821	9.28698164	9.011739892	9.163059351	9.15286161	9.195770181	9.463926174	9.265588468	9.312535977
Casp4	9.728961049	9.987837465	9.923904051	10.0079272	9.42412973	8.901418444	9.11236578	8.955944512	9.895863091	10.15969796	10.01268404	10.08508216
Casp6	8.110667478	8.236665337	8.165172639	7.838897698	8.734828018	8.665520338	8.850520799	8.7795088	8.073588228	8.01689805	7.903390286	8.300677226
Casp7	8.223756024	8.164219335	8.310609372	8.386770784	8.309638585	7.965508679	8.198269382	8.327861451	8.420909086	8.82457568	8.445424941	8.23967146
Casp8	10.18692442	10.08403495	10.12346204	10.14026337	10.46375084	10.73146217	10.68439736	10.51052027	10.24696574	10.08214388	10.0897816	10.24685737
Casp8ap2	8.5528547	8.182790426	8.530119022	8.559835969	8.266767869	8.050219007	8.087761074	8.207529754	8.556842771	9.143455907	8.758585244	8.609099617
Casp9	9.132275452	8.946588627	9.096769561	9.031793545	9.019355345	9.297121649	9.186297242	9.148401589	9.065819167	8.973739689	8.934383161	9.037254831
Cass4	7.076892817	7.145753232	7.356969669	7.159746945	6.60163293	6.273625216	5.969435585	6.294572585	6.997101825	7.256249123	7.349222317	7.221308041
Cast	10.98110381	11.03750635	11.0175129	10.98303674	11.09125729	11.3443181	11.33938883	11.11354065	11.27805993	10.96859658	10.9935193	11.25384365
Casz1	6.764506482	6.863877456	6.674101048	6.728705373	6.720535141	6.784175588	6.617478595	6.647085663	6.597344783	6.434333363	6.790806764	6.706595371
Cat	12.81336479	12.49002275	12.49082085	12.53041029	11.90900565	11.70653871	12.06195462	11.66391488	11.99586863	12.52167761	12.16546361	12.5239139
Catsperg1	6.108719822	5.600262797	5.867569235	5.516740435	5.925878412	5.76636861	6.005935207	6.023836546	5.428043771	6.096010598	5.589137562	5.922065023
Cav1	7.918450445	8.852287467	8.797968069	8.762069516	7.750318922	7.120116335	7.628984107	7.340067504	9.63710524	9.333470806	8.878922432	9.203737587
Cav2	10.31660226	10.37111246	10.41138854	10.2093579	10.47264536	10.57533601	10.66693703	10.51475908	10.83473984	10.67753899	10.54566189	10.89987048
Cbarp	6.668911472	6.408264378	6.354161534	6.381730613	6.22074516	6.218238735	6.201018635	6.284620796	5.955950774	6.219104294	6.290427237	6.179255997
Cbfa2t2	9.291745722	9.180151441	9.101445285	9.322274788	9.402803805	9.575665995	9.507910148	9.401416073	9.122280343	9.061012433	9.207474437	9.093139008
Cbfa2t2-ps1	6.359889576	6.368754453	6.214935358	6.505456877	6.380115454	6.491120545	6.448766496	6.366108604	6.234905048	6.115035079	6.311208224	6.103344596
Cbfb	10.58904868	10.550472	10.69647132	10.60409529	10.3763922	10.15000418	10.22714478	10.37957122	10.81196121	11.0769259	10.85378598	10.79373559
Cbl	12.48001462	12.34024865	12.36957836	12.5006164	11.8816365	11.93862542	11.87139376	11.76082144	12.09745809	12.18023514	12.21813709	12.19767137
Cblb	10.1398514	10.228676	9.851003243	10.29329752	10.71609496	11.32613805	11.44902377	10.79943264	10.44852576	9.749658063	10.00444511	10.21174195
Cbll1	8.025018282	7.877799864	7.878795758	7.913043984	7.919602817	8.049054686	7.974299425	8.097472384	8.041281118	8.059047667	8.132807033	7.975385849
Cbr1	8.327196324	8.0658939	8.279749183	8.347467128	8.263962907	8.269058583	8.248280804	7.969598706	8.043295132	8.29950188	8.106424377	8.31738853
Cbr2	6.328520722	6.357423364	6.275612293	6.19889413	6.485169111	5.852353534	5.713350454	5.685762742	5.539968898	6.143881833	6.364695983	6.469001859
Cbr3	8.28248656	8.159350545	8.322323472	8.217932832	7.464707425	7.469106138	7.18884678	7.412640938	7.911205996	8.029943298	8.147229729	8.027826211
Cbr4	7.539688525	7.450554161	7.471764797	7.190335713	7.889834041	8.23054064	8.392877771	8.304111364	7.779403341	7.527831107	7.34428334	7.71447883
Cbwd1	6.881716242	6.852915793	6.505190141	6.570280868	6.958086028	7.056294711	7.228265721	6.997244495	7.016895203	6.947486969	7.123241611	7.28917211
Cbx1	8.928822112	8.893355262	8.861765011	8.760029696	9.1843882	9.219792249	9.164336504	9.292895309	8.924856561	8.924919362	9.011965357	8.985141869
Cbx2	6.064090101	5.738813219	5.95438872	5.782091745	5.510976329	5.549581165	5.293227172	5.839699116	5.855804042	6.142476089	6.183254581	5.809079611
Cbx3	7.33102776	7.115909283	7.044878593	6.931698952	7.096199609	7.184738768	7.126989276	7.450835985	7.072688068	7.199267386	7.328047569	7.117380501
Cbx3-ps6	5.804244277	5.554782839	5.695603288	5.640675646	5.836781838	5.821957333	5.531844807	5.799765301	5.692032276	5.956318219	6.105610296	5.892617445
Cbx4	8.839879645	8.304114092	8.241970027	8.408101776	8.206334508	8.039425144	8.034191586	7.888570172	7.595099908	8.297774825	8.365152448	8.344642112
Cbx5	9.942256322	10.18783397	10.42988595	10.13897069	10.07929392	9.41946587	9.531666163	10.16645206	10.50111784	10.91536824	10.56111597	10.21724533
Cbx6	6.725952164	6.572118333	6.72153806	6.952894124	6.279269505	5.754416858	5.789549099	5.962715748	6.192317195	6.871003673	6.686451705	6.281928993
Cbx7	8.051754006	7.946018357	7.699809483	7.835338509	8.684668399	8.471804936	8.640371159	8.804340873	7.69955064	8.018149753	8.095792404	7.796293664
Cbx8	6.858764996	6.651136111	6.474409603	6.410337579	7.066366814	7.277334439	7.435980355	7.497161682	6.578019092	6.574680352	6.592760944	6.595651641
Cby1	6.293909	6.569941254	6.246993108	6.294590804	6.425885084	6.176753106	6.417262572	6.182394262	6.270547884	6.243647608	6.326086288	6.513356902
Cc2d1a	9.017827647	8.973595203	9.029767309	9.03454178	8.772851545	8.764781521	8.763890311	8.92572993	8.861480143	8.913782611	8.858501714	8.691887625
Cc2d1b	9.62827552	9.524054476	9.769711289	9.622181036	9.318607485	9.288898021	9.133853316	9.269655159	9.514984718	9.648915225	9.558303117	9.570031528
Cc2d2a	6.626237227	6.800469389	6.860459753	7.043193759	7.101477858	7.091769931	7.188234803	7.162115032	7.2833636	7.118839365	6.962384129	6.805769894
Ccar1	10.05714451	10.031876	10.06267264	9.903049773	10.187089	10.15146882	10.23554903	10.25823422	10.08278444	10.14367312	10.02879628	10.16573396
Ccar2	9.513896171	9.428504035	9.704410999	9.616972225	9.474059047	9.418264513	9.185011904	9.260843304	9.450759505	9.591946175	9.54929182	9.560899194
Ccbe1	6.109633401	6.21819718	5.773646421	6.462955322	6.156196035	7.000273041	7.033702035	6.137593412	6.438867481	5.486226695	5.89734846	6.104148182
Ccdc107	6.932313143	6.985950602	6.914406801	6.875655096	7.229003696	7.301056774	7.391490051	7.372876597	6.983266371	6.857575835	6.838686359	6.896051517
Ccdc109b	8.477572358	8.540986686	8.5148914	8.630947879	7.580544041	7.286867451	7.438952845	7.395246254	8.555286074	8.785548336	8.659558228	8.587208339
Ccdc115	8.575561397	8.306249299	8.516178269	8.400292424	8.468544999	8.424688771	8.48479754	8.518285682	8.301664481	8.614832807	8.344795068	8.427192772
Ccdc117	8.982529273	8.891415902	8.904602892	8.776022196	8.984038252	9.28076902	8.798943863	9.317651762	8.92789421	8.722276813	9.190914981	8.800787777
Ccdc12	8.571418737	8.394718577	8.459695155	8.340708085	8.134705232	8.14152883	8.028361502	8.159679514	8.288841534	8.458718096	8.506908846	8.494577904
Ccdc122	6.803214784	6.893940481	6.736835386	6.932519268	7.513038664	7.307757471	7.655262868	7.337626101	7.139518648	7.254074143	7.063673841	7.185626726
Ccdc124	8.097530936	7.963416893	7.865442068	8.210075646	7.995698648	7.985591436	8.210160588	7.667596704	7.90730251	8.051523767	7.92492944	8.122859746
Ccdc125	6.638410165	6.249767288	6.562713087	6.26409491	5.66075211	5.831383513	5.712793451	5.747274365	6.093374574	6.311386049	6.117030312	6.381167574
Ccdc126	6.46715191	6.179873789	6.221660112	5.977029064	5.788011536	6.031854936	6.078491106	6.522805522	6.188412519	6.23184724	6.143424747	5.943741379
Ccdc127	8.756682659	8.951178448	8.667072404	8.696054803	8.808433664	8.915771552	9.011351465	8.86743	8.938684579	8.636850902	8.825377033	8.940316099
Ccdc130	7.317651976	6.853523852	7.129038572	7.097920948	7.243194296	7.407140081	7.412555016	7.393179848	7.057033574	7.357215914	7.076286259	7.12677905
Ccdc134	7.050504306	7.349429012	7.19590573	7.4760226	7.405143147	7.191228329	7.218519941	7.304951716	7.257252391	7.172242503	7.298474173	6.931925528
Ccdc137	7.018434408	7.095338519	6.739792154	7.047698945	7.063082055	6.954208985	7.170309473	6.876161864	6.760371821	6.79234078	6.931786657	6.918027476
Ccdc14	6.966006851	6.75925752	7.129186668	6.900636266	7.030841613	6.653149151	6.715791592	7.309455916	7.169847948	7.754289741	7.321718151	6.95660423
Ccdc146	6.799394647	6.705891402	6.870524346	7.129174257	7.402564283	7.058839498	7.093880805	7.36101342	6.640503174	7.077731204	6.878056953	6.352274428
Ccdc15	6.625055208	6.739080593	6.750090259	7.068121008	6.898768842	6.2598244	6.615020388	6.38058501	6.656147091	7.181066148	6.814860494	6.731265122
Ccdc154	5.934412869	6.087550524	5.982276364	6.197995043	6.254683313	6.245704224	6.121372745	5.929736285	6.148386823	6.004228258	6.233833896	6.209751677
Ccdc157	6.502454102	6.568733805	6.25138597	6.488466584	6.607355543	6.708536145	6.713459706	6.858580807	6.156526009	5.989065703	6.301489976	5.919288262
Ccdc163	7.257802674	6.901713073	6.987588448	6.878935	7.304216916	7.364673616	7.52046078	7.468107248	6.609163747	6.904796649	6.66313411	6.82414109
Ccdc166	5.933121106	6.12624101	6.060300973	6.129609461	6.503735424	6.234979708	6.398404305	6.504439872	5.936396311	6.012032122	5.914547563	5.739203508
Ccdc167	6.727113307	6.871133479	6.768762275	6.486676992	6.675696416	6.119651705	6.604312329	6.607461382	6.43212978	6.844154319	6.461864899	6.740801129
Ccdc17	6.095416747	5.695213435	5.722836116	6.292146327	6.41433054	6.174933193	6.277214006	5.729460775	5.476683951	6.116284609	5.986381116	5.964824135
Ccdc171	6.889394883	6.544597532	6.546593978	6.183067508	6.29979397	6.387420538	6.581604544	6.448501671	6.4317095	6.688880284	6.492699832	6.989329176
Ccdc174	8.246775377	8.048057078	7.918987994	8.050647926	8.081098149	8.117167384	8.138855185	8.173848575	7.984334839	8.146983903	8.254365185	8.087711864
Ccdc18	5.739215231	5.720990493	5.898623109	5.818974216	5.861826993	5.053407991	5.2739159	5.44078207	5.771546146	6.598189886	6.200049361	6.112832084
Ccdc181	6.382946379	6.411873984	6.133915868	6.133431219	6.403933838	6.143344264	6.336489234	6.399524118	6.253480957	6.485142926	6.569956072	6.507405837
Ccdc186	9.750133164	9.76460985	9.646491196	9.718030052	9.607773503	9.51021672	9.442412326	9.625712611	9.683937712	9.76701781	9.952940858	9.698101718
Ccdc189	6.181679508	6.406175106	5.880009939	6.219915876	7.118294749	7.390702979	7.739278238	7.11452593	6.181891419	5.68498759	5.862577498	6.14742387
Ccdc191	6.676391448	6.115408858	6.486870513	6.112585206	6.162907025	5.987354741	6.306046763	6.423145026	6.161237829	6.897772704	6.207619026	6.464806071
Ccdc25	7.897599435	7.71953958	7.773934676	7.815928737	7.795866007	7.992907569	7.800284335	7.623294084	7.879922782	7.860941075	7.999169213	8.134165403
Ccdc28a	6.551723635	6.242631731	6.45767544	6.571398955	6.371727331	6.139062626	6.485661601	6.197903106	6.473785848	7.015542457	6.453899773	6.627934753
Ccdc28b	6.55137294	6.106728853	6.460557567	6.371598897	6.416005281	6.42257674	6.396435931	6.561446265	6.220350403	6.658423031	6.330735126	6.254683462
Ccdc32	7.97305535	7.996118138	7.975899758	7.754659377	8.244081392	8.318373739	8.452623178	8.351520643	8.098130203	8.000775067	7.886744009	8.209086925
Ccdc34	7.095687944	7.098985064	7.040478356	7.300403893	6.576270651	6.111097411	6.839036242	6.433541588	7.213718813	7.675594933	7.00616281	7.151731926
Ccdc43	8.03110884	8.030216394	8.066423839	7.909658544	8.144318613	8.254967961	8.278826541	8.024456024	8.268925187	8.159168285	8.09910226	8.510238072
Ccdc47	9.566619801	9.538426941	9.509343292	9.392663315	9.706567919	9.802055096	9.93944059	9.746732249	9.715396318	9.648102	9.539800155	9.849188473
Ccdc50	11.71384108	11.71492422	11.84658076	11.8608389	11.45857173	11.03123903	11.05510066	11.19276757	11.63286561	12.05911518	11.903597	11.75167195
Ccdc50-ps	7.062404483	6.919005798	7.061534967	7.030002902	6.86553089	6.46032616	6.408908864	6.631084711	6.861366866	7.409970281	7.318858408	7.128214624
Ccdc51	6.324076777	6.395316398	6.547907294	6.208577851	6.629879923	6.662331881	6.40944053	7.0734286	6.344258925	6.240567345	6.3408678	6.016209173
Ccdc53	7.833099937	7.756790928	7.877633485	8.037813708	7.892201422	7.862904113	8.002707386	7.524727081	7.77751795	7.883124267	7.622478437	7.940278519
Ccdc57	6.886563994	6.91893294	6.989383873	6.58025332	6.598665123	6.432631642	6.277079597	6.98907297	6.665982939	6.799647474	6.884748586	6.581885767
Ccdc58	6.805840392	6.715307741	6.620430624	6.324868788	7.055462357	6.877073402	7.204750287	7.260929028	6.663342846	6.932264453	6.699464685	6.93884778
Ccdc59	8.620150442	8.406264699	8.262550484	8.307444549	8.606265012	8.615807405	8.803567883	8.619302482	8.213624305	8.417967655	8.373921392	8.513292727
Ccdc6	10.40147503	10.26302514	10.30561675	10.45490337	10.37622543	10.56541638	10.51807159	10.34886552	10.38776021	10.33701914	10.34177232	10.36169176
Ccdc61	6.986715435	6.997816069	7.153519421	6.747072822	7.1995174	6.839642092	6.904425643	7.357542096	6.89630612	7.245080794	7.024593891	6.977924036
Ccdc64	6.033969074	6.328767168	6.424607158	5.936650026	6.398951724	6.371403218	6.706909136	6.790531213	6.356813256	6.089563669	5.658217761	6.062552816
Ccdc66	6.784843165	6.591524312	6.573084897	6.434970478	6.601597589	6.385624502	6.651718074	6.498384412	6.591692813	7.000984753	6.753330596	7.044778676
Ccdc71	8.616461715	8.536622536	8.622648384	8.729802414	8.639558856	8.595555972	8.589776557	8.398155326	8.4144678	8.538309863	8.458063431	8.542530632
Ccdc71l	9.411692449	9.554032982	9.469940642	9.4905649	8.979419368	8.806156171	8.86266802	8.781533092	9.274128141	9.305050806	9.332631297	9.393141967
Ccdc77	6.687404474	6.490056796	6.588413858	6.139167295	6.575494825	6.465437574	6.502139213	7.019692226	6.693710887	7.001115816	6.866057115	6.797750666
Ccdc82	8.290242785	8.246937013	8.153462175	8.06635234	7.830996452	7.411563369	7.606841695	7.557575727	7.794753808	8.257492663	8.155689174	8.292064977
Ccdc84	6.892947449	6.78951494	6.73334662	6.88014817	6.868309914	6.502690339	6.637601862	6.785516568	6.404122839	6.873174922	6.79443172	6.499715464
Ccdc85b	6.884834047	6.81463472	6.975926065	6.770904202	6.201712469	5.938679857	5.813032094	6.14173378	6.680782546	7.014014484	6.978370902	6.85469108
Ccdc85c	6.263134293	6.657699886	6.249438807	5.893909217	7.438414887	7.916111152	7.93669412	8.017003272	6.509200474	5.636938615	6.024616727	6.299837165
Ccdc86	9.012309332	8.886327405	8.771654078	9.041497356	8.486181341	8.633790835	8.445588908	8.442286364	8.798147814	8.776520247	9.0793955	8.812854766
Ccdc88a	11.31188784	11.47133056	11.31711369	11.46471686	11.84376374	11.78527794	11.90651421	11.61440551	11.4744177	11.37346077	11.40644138	11.5509469
Ccdc88b	10.30482115	10.20936508	10.2593849	10.36827226	9.764995415	9.659244562	9.330476447	9.799465071	9.986566244	10.18777317	10.46652146	9.888645475
Ccdc88c	5.311863175	5.881132262	5.129413049	5.293917726	5.836587957	6.123156773	6.394458746	6.222929191	5.866868316	5.011030414	5.491447653	5.498472531
Ccdc9	9.699427265	9.541674464	9.456238489	9.635274929	9.397458609	9.252578351	9.17699643	9.241988657	9.083751492	9.386384552	9.547402447	9.30337378
Ccdc90b	7.16809912	6.995807624	6.987258911	6.744430505	7.278779443	7.414397069	7.501607315	7.362901638	7.015484057	7.052157928	6.973496395	7.355030478
Ccdc91	8.007361525	7.978704244	8.00714742	8.019243194	8.265087522	8.374786822	8.424509898	8.099462318	8.157620885	8.076578866	7.998412614	8.311364419
Ccdc93	10.11009346	10.1468124	10.18169129	10.40750624	10.30246031	10.40717417	10.36775991	10.08077143	10.26474142	10.12330862	10.127844	10.18901751
Ccdc94	7.143638976	7.103063003	7.071361814	6.980508691	7.139857546	7.072439028	7.110647738	7.27580645	7.133996384	7.241990875	7.235483354	7.161177766
Ccdc97	9.699230286	9.678165403	9.62532967	9.676266203	9.621472608	9.669527687	9.541544632	9.555384403	9.346675233	9.319685037	9.500503825	9.435727522
Ccer2	5.809981859	5.866239277	6.102621571	6.418071464	5.419498522	5.519716611	5.293185176	5.016261245	6.068433576	5.911958068	5.902107209	5.863581247
Cchcr1	5.957693453	6.021693857	6.320209586	6.068312587	5.987044503	5.47103012	5.248851091	5.78649275	5.935071119	6.387085098	6.310748398	6.025003737
Ccl12	6.213758775	5.766885876	6.184503902	5.97039108	5.665270248	5.287739332	5.498130884	5.536847807	5.571816395	6.396220212	5.768210633	5.943606532
Ccl2	10.2888071	10.35251158	10.61686447	10.12372929	9.381177464	8.865956849	8.868526509	9.107888869	9.734880001	10.18639614	9.919473582	10.17324641
Ccl25	7.624081159	7.720137627	7.49274462	7.280430928	8.097634325	8.130623248	8.07285794	8.455499308	7.463229931	7.334184538	7.619342855	7.449015178
Ccl3	10.14011726	9.56485979	9.763042201	9.589893387	8.752683204	8.287555918	8.225407387	8.359074134	8.75093096	9.791315715	9.655281834	9.694763901
Ccl4	9.835065077	9.188340407	9.628419186	9.33535886	8.418803502	8.451199964	7.938231917	7.962013554	8.673029844	9.287358051	9.36024732	9.629526008
Ccl5	7.240209571	7.010864967	6.902694117	6.991652231	6.610281831	6.087741729	6.585866975	5.630193742	6.294240848	7.046125555	6.656171159	7.522886278
Ccl6	11.18087816	11.31992294	11.17315446	11.27963799	9.427621883	9.162477557	10.1193667	9.356091678	10.95570695	11.0818065	10.27168584	10.92847732
Ccl7	8.696121944	8.745915143	8.960042843	8.610381347	8.103512961	7.312011499	7.887257075	7.511734636	7.967383857	8.70909212	7.919718844	8.644902778
Ccl9	13.48788698	13.69051311	13.67745097	13.85546981	14.07995683	14.2315179	14.43701336	14.08221962	14.15193059	13.7977434	13.60531008	13.78208498
Ccm2	9.125590482	8.647192925	9.095668233	9.023624512	8.518635726	8.805388472	8.631269376	8.508431269	8.94897548	9.14062029	8.866264079	9.061145907
Ccna2	8.690327728	8.996363737	9.308807935	9.216182612	8.642857093	7.906469591	7.88992547	8.207006109	9.397966459	9.828317952	9.532417875	9.307962559
Ccnb1	7.500894224	7.885568465	7.99816176	7.756951961	7.564767366	6.73748589	6.947870081	7.323408688	8.234824344	8.677431579	8.354454094	8.220125285
Ccnb2	8.001399838	8.179551537	8.058175171	8.129182322	7.741507484	6.951567141	7.236470417	7.531033216	8.257146136	8.868934779	8.705407869	8.33983792
Ccnc	8.608745485	8.591967683	8.554321569	8.733977238	8.329986946	8.24731426	8.461414347	8.08660371	8.714783911	8.814234399	8.637780427	8.832935394
Ccnd1	11.15699327	11.65878421	11.81506071	11.67292236	10.27809617	9.849662061	9.940125351	10.27758201	11.96075082	11.887394	11.6406542	11.4453359
Ccnd2	8.243568258	8.757316631	8.82080793	8.941326441	6.43776754	6.388941929	6.517434207	6.387251307	8.761647948	8.296725185	8.104741609	8.114405998
Ccnd3	9.143121093	9.030113071	9.320954038	9.295785522	8.202340291	7.888326376	7.671161839	8.075004119	8.849645739	9.276667676	9.202991246	8.824317482
Ccndbp1	8.707736127	8.690412941	8.663156293	8.588269938	8.526643227	8.569584381	8.465438324	8.578503091	8.625375403	8.599757435	8.73116014	8.692981728
Ccne1	6.941654268	6.810606013	7.201497566	6.922537841	6.628728295	6.362225554	6.323938444	6.908841027	7.189194145	7.586745141	7.234140698	6.928197841
Ccne2	7.741996115	7.920693548	7.762981972	7.668023968	7.982538931	7.610690596	7.711124309	8.0798976	7.972580571	8.165731473	8.223009335	7.949194049
Ccnf	9.33248333	9.880724155	9.849265722	9.496489358	10.10400851	9.713375471	9.423591912	10.37604731	10.02255165	9.864943864	10.18618586	9.586506826
Ccng1	11.46716637	11.56305129	11.45554765	11.32882977	11.34323028	11.40156844	11.58420562	11.51725835	11.70278712	11.54856404	11.47343049	11.66709565
Ccng2	9.16733803	8.940937963	9.152603565	9.086883109	8.815929234	8.811813046	8.570309468	8.562737021	8.856889203	9.087405458	9.117243434	9.190536337
Ccnh	8.073809461	7.840421988	8.001198903	8.160427926	8.197155761	8.180254929	8.109903228	8.147474244	8.146420978	8.396709283	8.306284069	8.10948403
Ccni	11.24991841	11.19745393	11.06925475	11.1866021	11.23457775	11.38014745	11.4819829	11.28287264	11.18092164	11.08781642	11.11418014	11.19594306
Ccnj	6.334791985	6.275557807	6.373307235	6.467841799	6.486710803	6.42229796	6.515792766	6.375193516	6.392956873	6.516603894	6.325359659	6.371424345
Ccnk	9.516161502	9.598244846	9.568133199	9.609439385	9.570147425	9.433958048	9.31933855	9.426780241	9.374245131	9.428351162	9.573082307	9.424334431
Ccnl1	11.73373514	11.58207208	11.66025759	11.61297926	11.33647401	11.091623	10.85579955	11.03553828	11.20043122	11.59694529	11.75458323	11.62212283
Ccnl2	10.43415526	10.42931463	10.38980382	10.41448468	10.60564009	10.41560919	10.39187221	10.39661864	10.02611555	10.22098707	10.28423486	10.25480758
Ccno	6.279027409	6.210437394	5.88605035	6.288154627	5.851736228	5.557812785	5.685966104	5.180022522	5.573097687	5.935611144	6.131844869	6.235684174
Ccnt1	10.10482718	9.995074412	10.00022111	10.01329935	10.07917759	10.06691439	10.0568371	10.138718	9.921038251	10.04305423	10.04798482	9.95302568
Ccnt2	10.36137177	10.46612804	10.29129379	10.31275784	10.47929196	10.28274682	10.42014515	10.39960642	10.18678116	10.27857003	10.31600595	10.31508064
Ccny	10.95020259	11.07172134	11.02337401	10.94030699	11.24249659	11.51216863	11.43559915	11.35603492	11.27438783	10.88319704	11.00811385	11.17074509
Ccnyl1	7.179999973	7.27541109	7.019325691	7.162273937	7.168235539	7.265049179	7.277263441	6.919808022	6.967798916	6.77557416	7.019445297	7.23395247
Ccp110	7.274728185	7.144133279	7.360685772	7.331001264	7.015515904	6.382157994	6.605933872	6.8687752	7.114974842	7.878927656	7.438599286	7.205442465
Ccr1	10.91481469	11.27924731	10.63201881	10.59728122	12.29049864	12.64013937	13.22207739	12.82985754	11.41241227	10.69833891	10.76362939	11.19058683
Ccr2	6.633941495	6.552571381	6.778802554	6.683574721	5.536401394	5.35491816	4.992213972	5.738333909	6.640500196	6.903353545	7.039826559	6.388934455
Ccr3	7.756052819	8.235419304	7.570891032	7.852946187	9.142825915	9.444201884	9.94676068	9.297974964	8.74689496	7.966152506	8.128121981	8.494852543
Ccr5	10.25769297	10.23063716	10.58901844	10.17289493	9.008411504	8.226448175	8.596527464	8.839349342	10.54505562	11.35407476	10.62561419	10.79891582
Ccrl2	11.1567859	11.12829411	11.40541946	11.24141191	9.607985673	9.280389998	9.194585045	9.508487654	11.03751981	11.39360728	11.20228688	11.05239182
Ccs	7.603134631	7.26182158	7.45517657	7.461731613	7.172093713	7.425180005	7.280673027	7.129011431	7.39715979	7.485386549	7.436538537	7.581645091
Ccsap	7.670180585	7.386711102	7.66452158	7.4394025	7.045876407	6.748920321	6.87528098	7.359357167	7.63751067	8.217936239	7.813765102	7.554807996
Ccser1	8.299596881	7.747397945	8.028884979	7.999441276	9.186777872	8.570479508	8.65771068	8.85781526	7.451673812	8.620171113	8.251452906	8.080792029
Ccser2	9.845741234	10.0138477	9.829743954	9.938985983	10.37928422	10.45974718	10.64409855	10.3462402	10.07570912	9.82713969	9.826892067	10.01550839
Cct2	11.199303	11.29076859	11.29202748	11.19321129	11.42450176	11.48485889	11.51579972	11.65325589	11.66318677	11.51136406	11.47916433	11.44052436
Cct3	10.7436975	11.14570684	11.05363825	10.96872103	11.45995854	11.60546083	11.58757655	11.57210966	11.58585932	11.0383477	11.14830056	11.24868468
Cct4	10.92004927	11.06700995	10.95656981	10.92885472	11.10303899	11.13312571	11.06243392	11.13448811	11.19446738	11.01741999	11.19855191	11.15421281
Cct5	10.85740932	10.91163227	10.94593675	10.99068535	10.85831508	10.85730659	10.82840412	10.95406724	11.29196282	11.23874836	11.23334635	11.06293463
Cct6a	10.73798367	10.96253518	10.87887806	10.85307445	11.27618392	11.1773101	11.33006225	11.50497612	11.35469597	11.22901827	11.15992324	11.01081299
Cct7	10.59797118	10.71240393	10.77279159	10.836181	10.7013659	10.67567855	10.63803428	10.74690075	11.11552616	11.02678076	11.00403737	10.83178149
Cct8	11.1471195	11.26680251	11.20320131	11.2080615	11.2835136	11.2948731	11.32418129	11.3120581	11.56286562	11.43182312	11.46611613	11.47337913
Ccz1	9.573634772	9.605771516	9.611408562	9.575570661	10.00432129	10.06198463	10.10851885	10.02853731	9.826448873	9.736648785	9.684477519	9.800296963
Cd101	5.74207636	5.735739596	6.094084277	5.95629737	6.329810735	5.784718012	5.75574196	5.897679974	6.031178271	6.582607758	6.253239128	6.249088022
Cd109	9.844473407	10.51002927	9.593053303	9.32677413	11.23506175	11.89145575	12.46898644	12.0492233	10.95456019	9.632610326	9.972055607	10.65809792
Cd14	10.97107059	11.0142165	11.21825428	11.10495014	9.840214306	9.472971146	9.529265014	9.332655981	10.5959991	10.92009634	10.6597647	10.96967787
Cd151	9.193535177	9.26824235	9.246609859	9.066485847	9.272073059	9.514038351	9.587849298	9.567910549	9.43595759	9.119285124	9.067106668	9.26716943
Cd163	6.686441459	6.478801417	6.49113638	6.612456379	6.276351465	6.076524783	6.056950633	5.996395511	5.823610053	6.231076777	6.238315963	6.177551086
Cd164	10.9314854	10.80314916	10.85312302	10.93598547	10.59324049	10.67024676	10.64584	10.29083143	10.58230866	10.63363864	10.60807155	10.88021766
Cd180	11.62513191	11.55079126	11.42746765	11.71729316	10.89474681	10.75946054	11.33426861	10.63999806	11.54466242	11.75428934	11.30280488	11.70724993
Cd1d1	7.025056349	6.956941117	6.813411419	6.826059058	6.467266998	6.920770581	6.839425091	6.670451311	6.620983292	6.235594942	6.46047013	6.61679627
Cd200	9.193813765	9.710907845	9.097801572	8.930710469	10.48591212	10.90642814	11.39314722	11.05243926	10.04593066	9.108320555	9.234707745	9.742506812
Cd200r1	9.794967267	9.590045099	9.802241175	9.720131075	8.732873171	8.55238936	8.990652233	8.617367361	9.580727826	9.966133805	9.315674857	9.771069829
Cd200r4	8.422440598	8.171661297	8.331733522	8.432288732	6.901653294	6.716870239	7.03016081	6.479468547	8.075928202	8.511490558	8.038127762	8.488264816
Cd207	5.721896435	5.964072531	6.521376251	6.301652275	5.330324922	4.773555283	4.659609484	4.596907727	6.372446607	6.68704015	6.243682228	6.526107961
Cd22	6.269076804	6.268421349	6.053953782	6.178424213	5.816103162	5.689111283	5.978856729	5.679035156	6.101915105	6.229562438	6.154284559	6.329635702
Cd244	6.233583753	6.201457686	6.261045554	6.369303601	6.350091472	6.090252362	6.059633595	6.358911872	6.28708372	6.579048896	6.550079795	6.142543471
Cd24a	8.491275221	8.534971283	8.399293143	8.46454904	7.856595944	7.50634523	7.338527557	7.504918194	8.072807357	8.379362009	8.682857823	8.451211288
Cd274	11.40588102	11.42090871	11.46739229	11.5914269	10.62979178	10.09545307	10.14519626	10.00329007	11.21682065	11.73613167	11.63990491	11.65777649
Cd276	7.089735222	7.712881683	7.029403876	7.18955033	8.163516653	8.7731517	9.042282027	8.672380217	7.977520856	6.744739349	7.159086828	7.368842185
Cd28	9.738756873	9.399661661	9.886469802	9.86483224	9.186163744	8.694862234	8.79718866	8.682238093	9.16023849	9.99063521	9.401500644	9.538088774
Cd2ap	10.05355781	9.776380541	9.932478836	9.892231948	9.464061161	9.277950012	9.461361477	9.485498279	9.792615314	10.25590374	9.916393976	9.932504063
Cd2bp2	9.343260318	9.344807083	9.322274791	9.259127831	9.361213887	9.001400849	9.149644532	9.241094709	9.149293348	9.507559622	9.38184823	9.353545013
Cd300a	10.99526883	10.83779185	11.03002632	10.82820018	9.898826249	9.10361349	9.306457703	9.570109831	10.25000552	11.20269525	10.80761657	10.74579058
Cd300c2	10.41706888	10.37206818	10.50094914	10.39017231	9.27449507	8.814225246	9.151718325	9.012071528	10.10704726	10.61231778	10.14594374	10.39636738
Cd300lb	10.65471357	10.44045727	10.84057795	10.68245906	9.551080591	8.831200399	9.174577744	9.371438048	10.26884044	11.20297693	10.4594789	10.42073749
Cd300ld	10.86061739	11.1485313	11.15831535	11.07404142	9.569763906	9.142614332	9.603895303	9.474875698	11.05690261	11.19613827	10.72507325	10.93836678
Cd300lf	7.323846362	7.486998713	7.538919722	7.723173312	6.316303215	6.041737835	6.158710373	5.909772345	7.305066497	7.416479527	7.24758598	7.312270418
Cd302	8.870720595	8.811459721	9.019406035	8.754399934	7.946598204	7.67559249	7.809264718	7.558626711	8.530398925	8.860665513	8.519046971	9.034691079
Cd320	6.584736051	6.716017623	6.669131241	6.841676711	7.004614742	7.032087405	7.198168847	7.21482976	6.922266714	6.763512479	6.644317419	6.455111036
Cd33	10.58576061	10.66668785	10.75010132	10.56614931	9.652356371	8.930591375	9.163556125	9.368411852	9.931932131	10.57276989	10.25639167	10.23548795
Cd34	6.039988154	6.996542869	7.312389152	7.087814858	5.575469691	4.815141499	4.811764981	5.338757789	7.141407408	6.945180884	6.632711119	6.330292605
Cd36	12.86527533	12.88729198	12.65233842	12.82599131	11.46895291	11.17039851	12.11044127	11.37582478	12.67863264	12.95517039	12.25008118	12.81104479
Cd37	11.02638799	10.86163862	10.877454	11.08721747	10.37938658	10.41197753	10.5560077	10.28949743	10.76250704	10.89466547	10.73481991	10.79156672
Cd3eap	7.045012165	6.611985086	6.751456673	6.63191804	6.66457078	6.631233381	6.641484326	6.928226777	6.676213072	7.142577549	6.992855017	6.825651199
Cd4	6.942903552	6.9310877	6.666721814	6.997286682	6.86489713	6.116912705	6.387740228	6.120440178	6.012715636	6.772515912	6.766054276	6.702789458
Cd40	7.711219106	7.480815359	7.740671554	8.080716444	7.640734146	6.923156777	6.821084934	6.722462678	7.015011792	7.962992909	7.805208557	7.563785922
Cd44	13.53399644	13.80776239	13.57507789	13.9077961	13.77190841	13.97304409	14.18501365	13.44241866	14.16035414	13.6854525	13.70616744	14.11604422
Cd46	6.121769358	6.163453032	6.149984798	6.342801362	6.016042504	5.884289695	6.0706497	6.175533408	6.070969346	6.161038481	5.98814671	5.690446438
Cd47	12.30897726	12.25008024	12.3762269	12.43495285	11.96645587	11.97338828	11.88874947	11.74014802	12.24567119	12.29763579	12.25612795	12.34600344
Cd48	9.717035738	9.740848165	9.663419302	9.422176607	8.904933623	8.424121716	8.802417029	8.830402052	9.357691788	9.814691268	9.513824819	9.727082491
Cd5	6.349483124	6.869111998	6.355669156	6.555742374	7.568239785	7.681797951	7.852914641	7.702779309	6.825943804	6.192756765	6.535082916	6.48514503
Cd52	10.85495971	10.70821085	10.75682609	10.58652236	9.965232686	9.654464392	9.881794605	9.713027861	10.3472779	10.80479505	10.52884959	10.86792007
Cd53	12.05597917	11.86121168	11.94673479	11.98862477	11.13785006	11.18336574	11.41667622	10.86579694	11.83262216	11.98187397	11.66304038	12.17202967
Cd55	8.959082712	8.974255754	9.049970008	8.605227213	8.719555053	8.572497498	8.483165915	8.491474126	8.5038344	8.635718913	8.649336241	9.085770825
Cd59a	7.349174849	7.541783941	7.479330333	7.165336452	8.298990807	8.500197911	8.664694073	8.75105941	7.68448446	7.290668264	7.188625709	7.416254253
Cd5l	7.979055595	7.818702924	7.618563453	7.572729429	7.040184615	6.55351777	7.427113508	6.522715078	7.073273682	7.720293198	7.04683693	7.997069385
Cd63	11.45275027	11.26477836	11.45445566	11.30768022	11.34519131	11.72649277	11.50971085	11.21221348	11.40196515	11.2086356	11.23574023	11.68001304
Cd63-ps	11.92371607	11.86419476	11.93699485	11.95839418	12.21146208	12.43985855	12.49894089	11.96714736	12.0290825	11.86020733	11.7283249	12.23871911
Cd68	13.20829236	13.10097075	12.97389825	13.13689114	13.31562696	13.64656112	13.89589033	13.46045164	13.19395763	12.97034508	12.84808837	13.12053417
Cd69	8.120600202	8.279063962	8.497956468	8.614254613	8.295841715	8.298641363	8.062207292	8.438303105	8.489196755	8.327933346	8.345474911	7.853080953
Cd72	9.682087984	9.867001083	9.855996802	9.707232864	9.222379883	8.661575219	9.007919105	8.883274111	9.600666273	9.976557839	9.641218233	9.914627165
Cd74	12.5742437	12.47041758	12.67648995	12.94611643	11.41298232	10.63133406	10.52783754	10.44396172	11.49090493	12.3763793	12.27380345	12.08805279
Cd80	8.451079879	8.715669383	8.656566035	8.403687926	7.692815002	7.135902733	7.410643733	7.601401696	8.148648094	8.44097086	8.225333207	8.287453354
Cd81	11.34830004	11.39735605	11.57978566	11.32427591	10.39056632	9.815726947	10.07311458	10.26078318	11.16908355	11.69486691	11.25504967	11.32289082
Cd82	10.87593746	10.95257698	11.00846753	11.18052	11.2451457	11.318415	11.19112523	11.15201973	11.17879087	11.02888204	11.10028127	10.9673343
Cd83	9.609978647	9.394277578	9.436841491	9.777940322	9.148322301	8.831301163	8.738332417	8.739789404	9.027752357	9.560474564	9.610879396	9.268323578
Cd84	12.55402619	12.36082289	12.39865651	12.52969693	11.9573358	12.2231568	12.44006323	11.88600471	12.38937241	12.31675471	12.06201466	12.48503276
Cd86	9.501633539	9.621969872	9.772964549	9.476365729	8.820326494	8.21514504	7.911715793	8.355541093	8.676098404	9.160943525	9.313378095	9.166151615
Cd9	10.85271634	10.87712599	10.6017895	10.81237533	10.66177782	10.70722567	11.267965	10.6311926	10.83066712	10.76080963	10.47540678	10.90159336
Cd93	13.09417057	13.09940112	13.26108071	13.23788051	12.04927242	11.35887006	11.58797198	11.7403392	12.53167763	13.21684944	12.82606792	12.69690091
Cd99l2	9.335615392	9.478124981	9.18569249	9.353391686	10.01607145	10.43204796	10.57048024	10.24177661	9.690744816	9.132258708	9.286258928	9.447263356
Cdadc1	8.573019907	8.399331036	8.3670199	8.34187961	8.611147599	8.81584425	8.863917622	8.801658681	8.376390633	8.345382854	8.329620617	8.417019848
Cdan1	8.59225972	8.539444078	8.536099984	8.235368411	8.511241656	8.499728299	8.345090988	8.870346883	8.373382506	8.437711503	8.595692909	8.371168587
Cdc123	8.873440881	8.702928021	8.822142918	8.719206473	8.635339677	8.366044199	8.518451032	8.626796272	8.692075229	9.131883567	8.860261837	8.854853041
Cdc14a	7.401344372	7.445039022	7.419382301	7.440444839	6.484490632	6.314675067	6.339053905	6.545080653	7.341552197	7.467673111	7.468950994	7.241861709
Cdc14b	8.089951686	7.967214274	7.935678494	7.90881625	8.1545279	8.584681805	8.619022927	8.625838432	8.187853772	7.880437279	7.877631937	7.897678676
Cdc16	9.153613426	9.148257043	9.083452858	8.804544754	9.183222722	9.254368191	9.226676903	9.56086748	9.144663798	9.078874712	9.171370185	9.116087712
Cdc20	7.88202553	8.120859149	8.354512454	8.721817379	7.8782441	7.253898631	7.046012755	7.218021363	8.566797188	8.952309037	8.926541608	8.387228076
Cdc23	8.368285798	8.255570964	8.302793978	8.309559426	8.481868249	8.395191897	8.406505804	8.570617643	8.353280378	8.552671565	8.494134644	8.323257357
Cdc25a	8.384070567	8.348123796	8.304243244	8.275777102	8.281419886	8.088591915	8.205052221	8.733805726	8.484238683	8.713013423	8.64043367	8.140146307
Cdc25b	8.739301769	8.949781627	9.124035043	8.903243536	8.69652962	7.883462783	7.921727883	8.648575877	8.912279796	9.514866776	9.30234826	8.796291773
Cdc25c	6.312657686	6.492542397	6.347191122	6.165340601	6.116773127	5.449266652	5.688141604	6.259745755	6.514846989	7.002468752	6.908945077	6.519191446
Cdc26	8.273075335	7.968366872	8.050347858	7.991078427	8.103370956	8.343019708	8.402051247	8.318965251	8.15835574	8.223415451	8.082402925	8.224758352
Cdc27	10.20287439	10.12876776	10.13958024	10.20731564	10.1834022	10.12106389	10.214447	10.18501555	10.29255296	10.4289979	10.32480231	10.28649837
Cdc34	9.573103754	9.550056407	9.559760705	9.609474664	9.427190683	9.630724047	9.572779389	9.546341227	9.720779358	9.540293341	9.588533701	9.565257904
Cdc37	10.9202433	10.8975645	11.02351218	11.04867815	10.87362846	10.89837373	10.8306107	10.82588071	11.0799095	11.07784303	11.01965837	10.99922241
Cdc37l1	8.257279004	7.986724672	8.053545759	8.09625748	8.10756595	8.272674199	8.163102638	8.109209853	7.9676366	8.073082683	8.115833156	8.127014221
Cdc40	8.819696856	8.640718342	8.848844	9.005758043	8.95477954	9.049201221	8.945255829	8.817860121	8.977781199	9.062338032	8.958157766	8.928639431
Cdc42	13.16796021	13.18210945	13.17319358	13.04489233	13.18662605	13.23850329	13.3627816	13.27005255	13.43314543	13.36711896	13.25175652	13.47278682
Cdc42bpa	9.014901902	9.211731584	8.997607168	9.170136442	9.725025346	9.965421916	10.10915639	10.06432287	9.34457805	8.907351797	8.977741738	8.850045984
Cdc42bpb	11.00614715	11.04361689	11.04215395	10.94519699	11.0153473	11.41591103	11.06230456	11.15821517	10.98779689	10.54976342	10.90483284	10.90587919
Cdc42bpg	9.341439574	9.560066838	9.366732247	9.314917336	9.109373648	8.853789707	8.820517598	8.693432998	8.881177912	8.918134589	9.144741289	9.3236408
Cdc42ep2	8.619584042	8.997288783	8.784297272	9.154345124	9.533296967	9.428915179	9.493151546	9.082797667	8.972534646	8.699211694	8.847966836	8.888272864
Cdc42ep3	8.294239769	8.198221853	8.322960912	8.062632018	7.364040915	7.074986968	7.11060376	7.409295608	8.090817979	8.475889843	8.315533991	8.277171037
Cdc42ep4	9.3756541	9.460048117	9.655135294	9.795582922	9.587362298	9.594605118	9.308521153	9.266097626	9.729738741	9.638101904	9.729098691	9.63107459
Cdc42se1	10.39202932	10.31178425	10.50451182	10.34947113	9.495461635	8.85862238	9.025041373	9.300515114	9.992041176	10.7091255	10.34997894	10.22954589
Cdc42se2	11.52567217	11.37390799	11.4684496	11.49082732	11.41496317	11.61862261	11.50918423	11.34305063	11.47143902	11.41954377	11.43444053	11.57819641
Cdc45	7.312336902	7.619656282	7.793699431	7.72962831	7.369846153	6.604841934	6.463295555	7.611890572	7.731716994	8.189401833	8.156905064	7.072381168
Cdc5l	9.472045049	9.430405187	9.442713658	9.644140318	9.745617135	9.608932005	9.760687833	9.727469303	9.641808823	9.820133814	9.656069517	9.487861386
Cdc6	7.174053977	7.328758169	7.470952457	7.355772295	6.887355105	6.045996674	6.190151104	6.660378634	7.279508171	7.966162409	7.679813692	7.324766323
Cdc7	6.594480275	6.704138505	6.947704182	6.926932926	6.755951705	6.398016333	6.10887435	6.622132291	6.946740177	7.195017319	7.240593625	6.748106941
Cdc73	9.947280528	10.0364628	9.900397984	10.08538288	9.91896062	9.751596076	9.880120201	9.785870513	9.968086105	10.04626838	10.05380907	9.96307386
Cdca2	7.832181437	7.891790967	8.170615522	8.061196082	7.646190726	6.93866355	6.951829092	7.603261703	8.160643536	8.808561182	8.516571085	7.974557914
Cdca3	7.974861425	7.947123817	8.237782457	7.910232642	7.842383759	7.101437798	7.170861522	7.813365189	8.103803788	8.872487357	8.512404994	8.197451142
Cdca4	8.387171927	8.207511273	8.528251921	8.165965819	7.94263938	7.645241574	7.371050338	8.086399965	8.304015684	8.781074145	8.734524732	8.381461207
Cdca5	7.248516138	7.401145445	7.675916237	7.679356234	7.184825914	6.405698037	6.38307541	6.549983378	7.662800986	8.289299556	8.037151392	7.866803427
Cdca7	6.085736451	6.258919258	6.40812744	6.263820049	6.171559429	5.960996021	5.640457461	6.568913177	6.978560671	7.015941272	7.18727165	6.403123325
Cdca7l	7.915063526	7.826636257	7.760178149	7.796130006	6.615527317	6.337053556	6.679024966	6.89576125	7.897296629	8.264197659	7.988684357	7.735996216
Cdca8	8.319089459	8.36883589	8.577009579	8.245749559	7.766898761	7.224923282	7.270671174	8.070771555	8.695628621	9.187857669	8.933936088	8.465095727
Cdh23	7.854377913	7.485976662	7.601937612	7.410780737	7.592001567	7.878260044	7.912076522	7.610019173	7.506898618	7.589041392	7.439263963	7.932478188
Cdip1	9.052555911	8.901106739	9.038272156	9.106271798	9.037929476	9.287957925	9.211829071	9.178629346	9.043054969	8.944475693	8.883439129	8.848639213
Cdipt	9.837366168	9.891389734	9.970250761	9.947877877	9.766135292	9.892676485	9.936542856	9.797538447	10.05825249	9.877687727	9.754960329	9.916337623
Cdk1	8.66206974	8.837342309	9.051465407	8.985306466	8.568147341	7.678561008	7.949607768	8.301957445	9.148817068	9.863130832	9.377960974	9.091770238
Cdk10	7.434914866	7.24003234	7.408636335	7.559959288	7.373049355	7.253635555	7.274630468	7.299706684	7.135260066	7.449556392	7.259957484	7.083558315
Cdk11b	9.786629916	9.550538677	9.461359707	9.530404424	9.395981007	9.339008675	9.338447666	9.169121685	9.09020221	9.38326578	9.47300576	9.573287023
Cdk12	10.748963	10.82825084	10.66838703	10.87435744	10.62245911	10.56722598	10.50615438	10.38077214	10.61780431	10.59374961	10.81468501	10.73409684
Cdk13	10.96898029	10.84604228	10.82868642	10.85130607	10.91824434	10.96019051	10.91018244	10.91798648	10.68402228	10.76501411	10.83237805	10.80195435
Cdk14	10.95278925	11.17436587	11.27801155	11.32563941	10.31971875	9.994930089	10.14117331	10.24990987	11.47910071	11.58231275	11.33242385	11.17605944
Cdk16	9.703012148	9.635825782	9.47916367	9.66709242	10.12553468	10.3374103	10.38251232	10.11415235	9.571055675	9.426366414	9.537926507	9.61835773
Cdk17	9.336843828	9.206992839	9.275629346	9.348579031	9.080029062	9.017907582	9.076174615	8.990540016	9.266303003	9.458275472	9.331371932	9.344056846
Cdk18	11.57074178	11.63754143	11.51638876	11.74723845	11.81777602	12.0983443	12.11276209	11.83007723	11.62466973	11.27730179	11.38403668	11.43587185
Cdk19	9.553193839	9.41973096	9.562984674	9.560572177	9.114516693	8.74508166	8.800775685	8.924933607	9.303191102	9.806089014	9.607141274	9.485395849
Cdk2	8.502598518	8.508214703	8.636820823	8.750618231	8.704268324	8.403493275	8.480122412	8.568346334	8.60431437	8.899473234	8.694237977	8.492216648
Cdk20	7.697904051	7.775369942	7.920242087	7.835721594	7.257328031	6.77790817	6.856208068	7.120033469	7.625954865	8.027908835	7.804736792	7.625431884
Cdk2ap1	7.008289254	7.044132647	6.90885227	6.841904538	6.825043679	6.889593045	6.76179952	7.390767871	7.007439429	6.90704667	7.170120573	6.608099953
Cdk2ap2	8.642427166	8.648085437	8.583953468	8.624998355	8.888022881	8.922348384	8.92428261	8.964450424	8.501791861	8.461808086	8.524005829	8.442793128
Cdk4	10.08314015	9.957203005	10.13987279	10.21290949	10.06211157	9.866806606	9.875044605	9.933581509	10.12912034	10.45036245	10.25945466	10.12788106
Cdk5	8.38157196	8.27285847	8.415890284	8.489106113	8.612138538	8.82386292	8.849271098	8.382650282	8.359143632	8.256132741	8.08769275	8.481097736
Cdk5r1	5.961810045	6.211600768	6.0529455	6.350098058	6.381110514	6.475947376	6.512912961	5.650276144	6.137958041	5.793330457	5.91502014	6.480504399
Cdk5rap1	7.392519975	7.025909503	7.09906016	6.883067385	7.432190924	7.811052494	7.574156495	7.484192858	7.0580053	7.045754202	7.209499544	7.515455956
Cdk5rap2	9.618261389	9.793479057	9.786506772	9.756326507	9.900536267	9.870571853	9.875000321	10.2572253	10.12370457	9.978451314	9.980995131	9.628950414
Cdk5rap3	8.034753313	8.103923303	8.215435634	8.353957763	8.109235711	8.279200688	8.035701697	8.15753886	8.290610293	8.051475326	8.183461987	7.923102694
Cdk6	12.21112339	12.34943904	12.29490102	12.36888852	12.17025265	12.12634653	12.26461744	12.15979737	12.49570518	12.40129564	12.31756276	12.34839534
Cdk7	8.450656359	8.372601685	8.468174387	8.557913979	8.716388178	8.8488962	8.799302114	8.84409232	8.541078722	8.486625375	8.440646759	8.30611696
Cdk8	9.271459624	9.362660711	9.385582652	9.191337663	9.740907952	10.00944023	9.852602164	9.977432239	9.416730333	9.056996971	9.190913093	9.260328007
Cdk9	10.33960727	10.08500138	10.16262678	10.24408045	10.07088169	10.23290268	10.15918576	10.00583331	10.03644556	10.12903045	10.12512198	10.19702075
Cdkal1	8.797799007	8.783682123	8.97176275	8.916176335	8.869985215	8.681001559	8.687131652	8.757061102	8.916730739	9.11983128	8.925620559	8.911277525
Cdkl2	7.568673679	7.363968064	7.497547403	7.749912317	7.147165292	7.158091855	7.226461703	6.668898537	7.402715197	7.59649425	7.394545064	7.699743315
Cdkl3	6.257671426	6.465386025	6.126794405	5.943244928	6.646276876	6.152058644	6.685208269	6.919466947	6.267918658	6.55442229	6.359864286	6.309155085
Cdkl5	5.821101224	5.988845999	5.775077869	5.562503823	6.35680008	6.190702911	6.296504674	6.81677087	5.904112096	5.90246449	6.010430858	5.702738707
Cdkn1a	11.97818759	12.12452925	12.21525778	12.12380037	10.80423082	10.53588871	10.48182337	10.62523088	11.85054374	11.97254419	11.935881	11.8839309
Cdkn1b	9.71489011	9.482659317	9.469618036	9.4679328	10.09217371	10.09647633	10.1767191	10.0591496	9.266079619	9.494007796	9.426806308	9.546061041
Cdkn1c	6.35850076	5.727827256	5.940829409	6.585658259	5.203060861	5.479483684	5.657086087	4.284029243	5.611674627	5.965925308	5.575320752	6.303548745
Cdkn2a	7.410102255	7.072278327	7.601202153	7.344036874	6.41881053	6.460122994	6.320234115	6.079576198	6.976609419	7.273120882	6.884085936	7.381909131
Cdkn2aip	7.549960226	7.604263173	7.170502235	7.021227203	7.386027025	7.467318415	7.324528917	7.829074464	7.337267425	7.201673087	7.778223523	7.422953009
Cdkn2aipnl	8.672336458	8.896255931	8.877634316	8.6572902	8.585144047	8.305679056	8.422039524	8.849189744	9.039113738	9.094659255	8.996920403	8.790114299
Cdkn2b	7.723202477	8.010632481	7.867308579	7.695966313	8.686123075	8.734765082	8.858667583	8.906626707	8.006680385	7.670608374	7.690029774	7.813412917
Cdkn2c	8.958142981	8.970681751	9.134789092	8.995342051	9.522295898	8.994429179	9.044698852	9.246379696	9.099634927	9.614962876	9.400585862	9.338352059
Cdkn2d	7.687665817	7.309549779	7.71515244	7.53997471	7.051152461	6.877891998	6.802183035	7.088707486	7.5107919	8.062168401	7.732274704	7.620927982
Cdkn3	6.478947709	6.793579968	6.811227335	6.171662793	6.663748977	5.897201321	6.212278444	7.004014485	6.898128724	7.350044121	7.017319631	6.865148133
Cdon	7.196159309	7.515883137	7.055300917	7.08036613	8.597380906	8.901968601	9.237526413	8.847373393	7.444095529	6.819784007	6.944808414	7.309896222
Cdpf1	6.284386551	6.019713488	6.515332914	6.366365631	6.969751165	7.075833228	6.994845036	7.109098177	6.693858526	6.852449526	6.437818292	6.472532433
Cdr2	7.437464879	7.481823172	7.375472294	7.766488323	7.081530562	7.087874438	7.037810874	6.76521693	7.472108748	7.421406579	7.577821022	7.459398937
Cds1	8.361455251	8.379830442	8.512462278	8.444302304	8.250435625	8.385665215	8.211899852	8.158640683	8.265978244	8.112373462	8.15350699	8.274926132
Cds2	11.42570519	11.21010024	11.26644021	11.28121362	10.88342354	11.02015495	11.07813073	10.7149382	10.9672646	11.04613814	10.93182239	11.2802415
Cdt1	9.58361982	9.735076715	9.732812835	9.851616472	10.01859836	9.764133637	9.719768946	10.14074497	10.00487326	10.10788109	10.15450966	9.61473
Cdv3	11.08437975	11.23474878	11.06513985	11.17140133	11.42486094	11.39880918	11.38972955	11.26118188	11.26918546	11.1448682	11.32355674	11.34584294
Cdyl	8.780709055	8.80123421	8.842334545	8.71561182	8.453491325	8.521281688	8.428926435	8.471895539	8.865962333	8.777646815	8.828901732	8.912655354
Cdyl2	8.055949324	8.079960428	8.151475774	8.034238584	7.585764407	7.49489874	7.543710238	7.839360456	8.162987468	8.229842031	8.109515188	7.931102159
Ceacam1	8.497206275	8.301497694	8.361273827	8.026964996	7.918390911	8.216881241	8.023067756	8.118700471	8.298033033	8.195251283	8.329288635	8.567964751
Ceacam16	6.856411686	6.870221834	7.128023746	6.81692005	7.170306481	6.93179247	6.749646742	7.093522553	6.752918312	6.977622176	6.901965991	6.869193877
Ceacam19	6.418253057	6.048716311	6.538372731	6.5260302	5.780565803	5.765257263	5.463201421	5.493691752	6.265306434	6.65015172	6.462551142	6.444403343
Cebpa	10.17799928	10.20161211	10.20108058	9.967029603	8.893623402	8.395072567	8.739667208	8.811568681	9.569237852	10.04417585	9.700112741	9.862262248
Cebpb	11.1056806	10.91220081	11.00843439	10.87042759	9.980670139	9.692710514	9.416059644	9.670848285	10.21688124	10.69832066	10.87873795	10.7619561
Cebpd	8.354472909	8.249035265	8.485673843	8.028283998	7.944988351	8.045972799	7.715726241	7.988900547	8.016420002	8.020873198	8.114481179	8.298696717
Cebpe	5.885149761	5.875552041	6.357839323	6.355505407	5.59928799	5.545440702	5.457939992	5.406010556	6.276411815	6.339856822	5.945070251	5.999333602
Cebpg	9.144110222	9.174839342	9.033846641	8.95866099	8.923032703	8.962122472	9.040890274	9.169134866	9.230431801	9.160612912	9.222837811	9.169778869
Cebpz	9.269499962	9.252843056	9.129816705	9.14090044	9.170353342	9.320909247	9.168539826	9.376803341	9.302232313	9.168333313	9.443729086	9.224381836
Cecr2	6.995831751	7.117683304	6.682233849	6.717393696	7.178387016	7.018915413	7.151738738	7.434254545	6.730904089	6.768524138	7.071150269	6.753474615
Cecr5	6.93591569	6.774329186	6.936815013	7.068347364	7.07031427	7.173207498	7.108167911	6.746292572	6.842621487	6.901314763	6.803868523	7.034211511
Celf1	10.75511414	10.67198228	10.68839355	10.7508009	11.01451005	11.17722645	11.22324527	11.00301573	10.69274983	10.61316528	10.5507352	10.70855739
Celf2	11.44987655	11.44569341	11.61940596	11.57620099	10.52887298	9.894504862	10.08382104	10.31763726	11.3104507	11.94900196	11.58597323	11.39536198
Celf3	6.888648876	6.834977893	6.732219682	6.796282185	6.695270465	6.635718706	6.660343868	6.443394188	6.494125555	6.607348297	6.685481345	6.838368522
Celsr1	6.456473827	6.977491267	6.114557115	6.156470598	7.13726112	7.558180797	7.199704006	7.724343184	6.445840019	5.503902903	6.725313845	6.158761185
Celsr3	7.657153043	7.69741917	7.443606089	7.447529846	7.234146221	7.065243605	7.157854319	7.364809109	7.30666344	7.435299928	7.596502296	7.385623749
Cenpa	10.06354312	9.555103348	9.728781813	9.611685173	9.643099144	8.817064111	8.984040891	9.494576186	8.820708075	10.15518288	9.814527637	9.421088981
Cenpb	11.79841872	11.70599317	11.93739713	12.05255639	11.53983459	11.44902574	11.33834782	11.30625492	11.76526921	11.94850361	11.82777757	11.74471121
Cenpc1	8.498201267	8.459861598	8.628408492	8.838687237	8.419165715	8.252256088	8.297270863	8.090180245	8.777895324	8.98314462	8.769582952	8.766394825
Cenpe	9.227591491	9.376261811	9.51987239	9.081369126	8.952648703	8.326043128	8.525031437	9.466533239	9.801455358	10.27939061	9.936791726	9.433793187
Cenpf	9.127646148	9.201223968	9.412623418	9.51008211	8.850761885	8.032528922	8.191144075	8.717298195	9.629687288	10.37434243	10.00432783	9.380715016
Cenph	6.198586995	6.106234177	6.403288648	6.369116247	6.080206333	5.657164399	5.51528734	5.858183483	6.339073407	6.854468159	6.699290748	6.390567006
Cenpi	7.491907788	7.78121593	7.912015488	7.402186012	7.52028156	6.851185044	6.961052052	7.79476108	8.098110049	8.477898423	8.237231859	7.913352305
Cenpj	7.318641539	7.12295604	7.399549706	7.373024617	6.826853315	6.681362729	6.701175726	6.815611764	7.22983851	7.571014595	7.27460793	7.186696982
Cenpk	6.184748172	6.130906154	6.21560603	5.95968802	6.07104175	5.68510599	5.54538725	6.230930843	6.376565658	6.816343436	6.8713623	6.441736717
Cenpl	7.987590234	7.995725851	8.077654988	8.109280675	8.131335481	7.68845902	7.619436007	7.976477326	8.0637286	8.498469444	8.485563319	8.096896313
Cenpm	5.608880417	5.853994157	6.008595798	6.122160902	5.500046909	4.924853644	4.812527201	5.072643883	6.004122652	6.334202178	6.291926979	5.918245193
Cenpn	7.247052	7.2941271	7.465203934	7.451835573	7.153432782	6.42041617	6.501884597	6.66804706	7.231606373	7.917547885	7.665002624	7.512208523
Cenpo	7.602549614	7.515019594	7.801306627	7.602961501	7.615952137	7.385353072	7.39268095	7.782790821	7.764509008	8.082638094	7.789023182	7.597258438
Cenpp	6.086839274	6.255299023	6.263869786	6.082895757	6.312597627	5.746447832	5.900848008	5.846227289	6.100383786	6.498073832	6.335102893	6.570697641
Cenpq	6.887376795	6.719538227	7.0184701	6.593013291	6.921740693	6.289752577	6.226833915	6.958193653	6.65144656	7.451273244	7.215260033	6.909357104
Cenpt	7.283700293	7.343439014	7.313337946	7.324447705	7.25656478	7.01105463	7.082287781	7.14268322	7.338825763	7.524597191	7.483465109	7.411959911
Cenpu	6.787328728	7.023879559	7.017300425	6.945534844	6.446935822	5.595211497	6.0147239	6.043751319	6.655763341	7.270936835	6.858003565	6.900741728
Cenpv	6.340049518	6.341863919	6.234267057	5.857574869	6.5552608	6.165613798	6.572534272	6.893053553	6.283897114	6.671729715	6.372406103	6.42857901
Cenpw	6.03141938	6.356121684	6.085650985	6.0637317	6.334568627	5.649251059	5.960982381	6.193860688	6.27870001	6.639315274	6.598054651	6.387095629
Cep104	8.831698373	8.827771086	8.812119464	8.71435872	8.832971735	8.803969854	8.892644302	9.080340684	8.76987592	8.802805088	8.729782262	8.639846624
Cep120	9.539235788	9.378443829	9.362642026	9.394379644	9.121573366	9.137890112	9.243671928	9.154245115	9.220483713	9.364958926	9.274978912	9.332668108
Cep128	9.099046845	8.998403224	9.2062566	9.11693158	8.933130817	8.555731704	8.650898645	9.145137997	9.263230753	9.741273486	9.438253169	9.033338838
Cep131	7.193077271	7.111660766	7.235110131	7.553636551	7.119082089	7.093836653	7.046302455	6.422310344	7.054645814	7.161307755	7.085392587	7.390858278
Cep135	8.587124578	8.43479201	8.516892215	8.237608024	8.338476718	8.269147355	8.319409283	8.77307277	8.514382601	8.736044532	8.603682398	8.429303102
Cep152	9.234792733	9.447510552	9.341178481	8.824968336	8.719892791	8.343601223	8.110715251	8.781492686	9.155012565	9.318586315	9.657804357	9.503237067
Cep162	8.595213053	8.606866303	8.576214441	8.825220666	8.265245235	8.184664024	8.183410598	8.097106042	8.652878658	8.721806619	8.753711907	8.591010238
Cep164	9.078046017	8.954258375	9.040718516	9.207280032	8.784460429	8.522962115	8.528707782	8.511171026	8.780381531	9.165667486	9.073461678	8.924436918
Cep170	10.90019612	10.93660777	10.87766191	10.87660921	10.68787997	10.54218388	10.6191019	10.61089421	10.74614113	10.85542558	10.83745342	10.8467138
Cep170b	9.289218747	9.445441943	9.332697836	9.421538435	9.265994093	9.557209627	9.511015046	9.624449143	9.396201103	8.948762373	9.107701062	8.905426366
Cep19	6.14029538	6.10234411	6.087604263	6.03420326	5.806727221	6.227917502	5.962547691	5.511380211	5.974007332	5.59076832	5.870877979	6.375446461
Cep192	10.39315872	10.33376655	10.57172586	10.46151424	10.10787765	9.784528122	9.738441052	10.0517754	10.38589145	10.76863314	10.5767609	10.37363816
Cep250	9.821299975	9.625731896	9.735420337	9.806772982	9.389132141	9.701774928	9.367550916	9.453869663	9.645434533	9.528359825	9.752895396	9.595224004
Cep290	7.623723769	7.365928538	7.325873926	6.860061802	7.249133878	7.496819552	7.450099641	7.80375223	7.498407176	7.508516732	7.595291256	7.70745079
Cep295	8.788225412	8.64806508	8.730709531	9.065588996	8.983325087	8.368708564	8.578195545	8.576549769	8.656510247	9.411287102	9.11915567	8.78592198
Cep350	11.6168503	11.6537266	11.64284144	11.76720578	11.67336051	11.73145964	11.70906463	11.62469078	11.68984077	11.59486534	11.62814552	11.58815503
Cep41	6.348067594	6.081715276	6.230849535	6.047622025	6.387230277	6.137978755	6.385409745	6.694353675	6.277019671	6.792623511	6.396058262	6.270341843
Cep44	7.314531371	7.275240236	7.418315185	7.267464274	7.328909198	7.054884131	6.958567603	7.268898853	7.295553952	7.608870154	7.562111732	7.402631394
Cep55	7.462327302	7.59080789	7.818393049	7.624236882	7.290897691	6.648876411	6.704231004	7.017811202	7.894600235	8.408140927	8.125201176	8.005777144
Cep57	9.078889576	9.131645026	9.013963649	9.064103138	9.578059051	9.338559211	9.458382582	9.585172384	9.002722814	9.189467204	9.187325209	9.010395918
Cep57l1	6.767076478	6.894708797	6.871260541	6.704459806	7.00231981	6.615758039	6.675189858	7.113505553	6.833628905	7.092558357	7.056574794	6.785059834
Cep63	8.081224074	8.034392701	7.931920914	8.065824184	8.047899083	7.921588882	7.668618866	8.065305811	7.86494611	8.038087684	8.393529486	7.862939271
Cep68	8.972089708	9.053888446	9.127664117	9.080132218	9.14353205	9.069067355	8.816840059	9.037392545	9.088499141	9.081165098	9.259616724	9.086596135
Cep70	8.552849903	8.4699951	8.450569157	8.440123992	8.862685603	8.847392811	9.060660427	8.96980834	8.533167101	8.631314697	8.437473023	8.538770276
Cep72	5.953574338	6.244056831	6.207904859	6.319666042	6.622384443	5.990244312	6.340684826	6.473982411	6.415888061	6.757545698	6.443257156	6.198198389
Cep76	7.395380684	7.325672371	7.447477438	7.52323688	7.491922486	7.711858427	7.680097519	7.818640459	7.837944684	7.687717056	7.597672897	7.383370516
Cep78	7.589663399	7.377327414	7.578554616	7.695711389	7.134931097	6.926186325	7.052652536	7.199424771	7.49651105	7.917591808	7.589898394	7.325969386
Cep83	9.041952413	8.996085375	8.924777579	9.019763962	9.289815747	9.141075428	9.213539854	9.174806136	8.993281068	9.187888424	9.186731794	9.13047913
Cep83os	7.267090745	7.352333358	7.190507039	7.223086897	7.429760365	6.941450784	7.450101397	7.689789361	7.109197853	7.512264822	7.165440527	6.893172704
Cep85	9.212501133	8.980224646	9.164123455	9.283622002	9.637100491	9.565405424	9.140331209	9.55015594	8.97339302	9.277364573	9.51853998	8.989216701
Cep85l	7.508967139	7.672665127	7.450806042	7.830569168	7.385305378	7.363968563	7.289055348	7.064187534	7.37649499	7.234133817	7.530906117	7.376010805
Cep89	7.297292582	7.123416404	7.046093453	7.716922308	7.080696515	6.930504891	6.943483649	6.508694559	7.058005977	7.382073779	7.446417972	7.210378207
Cep95	7.406337895	7.319199097	7.322908243	7.163613758	7.759873712	7.580713233	7.561264068	7.758820775	7.014112827	7.280412104	7.296152124	7.257889902
Cept1	9.626318154	9.590596788	9.641856491	9.537082398	9.352626327	9.422950216	9.491375562	9.227644973	9.57667058	9.542068056	9.422383008	9.79088769
Cercam	7.056487869	6.839161856	7.000038222	7.019629054	6.164766724	6.013188784	6.068331158	6.06942736	6.638892711	7.007796664	6.791777924	6.771090891
Cerk	11.84488554	11.4997081	11.7792576	11.86345429	11.21434112	11.31533	11.09673411	11.1543341	11.44668464	11.69087319	11.62991957	11.4881229
Cers2	11.21143812	11.07119168	11.09026077	11.19282405	10.9269318	11.00917058	11.13976977	11.07750565	11.18437731	11.24238497	11.09271669	11.05241753
Cers5	9.560653542	9.515199513	9.709675152	9.683828173	9.137713202	9.027698984	9.087185771	9.114314109	9.717215586	9.872683833	9.618721407	9.617440048
Cers6	11.54586075	11.60478682	11.56891044	11.71205459	11.27374583	11.31248892	11.33490241	11.19725902	11.57577216	11.478103	11.49156589	11.48606513
Cetn2	7.811058293	7.670707148	7.76625934	7.469624822	7.864995899	8.009975416	8.059678083	7.877763742	7.947210008	7.942581636	7.797326777	8.275875636
Cetn3	8.116495046	7.836306004	8.061499627	7.884581101	8.053256101	8.072483815	8.102009103	7.928035472	8.143252989	8.404214317	8.149495406	8.500387563
Cfap157	6.201933283	6.298178799	5.95635649	6.198326363	5.874645067	5.861974865	5.820592695	5.573925381	5.888323248	5.804747934	6.187952415	6.192649855
Cfap20	8.596534147	8.724283804	8.880703792	8.69044885	8.717088037	8.544328202	8.418767747	8.557109956	8.658104341	8.703114518	8.672254985	8.724167719
Cfap36	7.382753943	7.008455281	7.144769752	7.180024408	6.975740326	6.788808467	6.962116894	6.662702164	6.987169432	7.548399953	7.238777055	7.50293713
Cfap43	8.082191433	7.901600568	8.234297186	8.213860989	7.561066587	7.274634474	6.930985834	7.555042435	7.688192419	8.155215398	8.166167419	7.562547016
Cfap45	6.416258671	6.088939676	6.264718472	6.243447879	6.556647632	6.923087436	6.911433039	6.763665319	6.547766935	6.508646126	6.344521726	6.51356004
Cfap97	7.992829515	8.088607702	7.953495414	8.006850174	8.025185548	8.113523849	8.193725397	8.059756022	8.14045893	7.956342442	8.011253182	8.091867797
Cfdp1	8.776369589	8.455554087	8.434080909	8.299556068	8.592639745	8.607634638	8.948914694	8.778641924	8.622137302	8.927957911	8.608151033	8.912948643
Cfh	8.335080513	8.200503709	8.285141499	8.318609325	7.525898301	7.961065123	7.910455873	7.015649237	8.105888469	7.805298451	7.771269912	8.632608721
Cfl1	13.11255332	13.07002604	13.14639637	13.20013422	13.0059665	13.17780334	13.31342373	12.96752683	13.41838507	13.28907551	13.0770848	13.36924384
Cfl2	8.324672014	8.329482735	8.089591131	7.986125031	8.83069765	8.749013122	8.962567245	8.839379887	8.065602803	8.142476609	8.16881409	8.395467548
Cflar	11.52540224	11.71417437	11.64694986	11.89513386	11.22123848	10.88809557	10.98422972	10.52101788	11.57657658	11.72094735	11.69203772	11.90706556
Cfp	12.89506738	12.7483541	13.04523963	13.07750396	12.47614821	12.29783892	12.13324856	12.07661446	12.60395205	12.92897462	12.79667945	12.82104923
Cggbp1	10.80431443	10.88397311	10.85539094	10.86411125	10.80020933	10.65471489	10.7846948	10.70718505	10.95012289	11.01595866	10.91456091	10.98335035
Cgnl1	11.03593249	11.25184479	11.07389105	11.17608448	11.46011331	11.67475981	11.73128844	11.65059894	11.37403427	10.94347547	11.06490059	11.04339666
Cgrrf1	8.260041396	8.182194137	8.116780868	8.191678043	8.262553284	8.386688245	8.459422143	8.344506741	8.091270296	8.044982595	8.037661964	8.077680192
CH25-588N10.2	5.53925296	5.60367628	5.683557371	5.716347633	6.261459167	6.140451055	6.08666613	5.810752788	5.91053343	5.967118223	5.941022058	6.184145137
Ch25h	5.666861171	5.957549317	5.758931624	6.34191439	5.330388141	5.030211055	5.324149922	4.616596808	5.842097664	5.851586605	5.756265431	5.880835778
Chac1	5.285936004	5.621301531	5.523998067	5.657485103	5.803354301	6.557453927	6.229955757	6.366424262	7.099147534	6.00968238	6.434484014	6.164528473
Chac2	5.842045995	5.958646015	6.013319252	5.477664702	5.956674198	5.934841404	6.04553525	6.043468414	6.072145721	5.977378495	5.812011412	6.349732798
Chaf1a	8.27724707	8.441686569	8.620685472	8.524808494	8.439311582	8.07651574	7.960966594	8.761817621	8.889258216	9.087614559	9.024164802	8.319190753
Chaf1b	9.209988911	9.233456175	9.292071991	9.391796278	9.745655379	9.443901297	9.470290074	9.612910848	9.303461469	9.581748286	9.496743693	9.254398631
Champ1	8.512491521	8.69743327	8.586988158	8.684111652	8.748984924	8.615132576	8.625864051	8.773556877	8.70166559	8.650576189	8.750289826	8.505473507
Chchd1	7.618091644	7.763888646	7.649624615	7.597410351	7.813970764	7.769647672	7.92987032	7.853452992	7.832237229	7.730763319	7.684804702	7.813436294
Chchd10	8.661615658	9.040781707	8.596923079	8.708780523	9.72416241	10.18061049	10.38984455	9.873700498	9.24531295	8.409698819	8.644323394	9.048609998
Chchd2	9.943570495	9.952431674	9.869952172	9.864947336	10.34645615	10.59021805	10.58935193	10.34589907	10.13134139	9.878718309	9.962063926	10.21052162
Chchd3	9.559916648	9.768095301	9.571746324	9.506045887	10.35631563	10.57022926	10.71441626	10.69817569	10.09547422	9.673381945	9.725543916	9.807484926
Chchd4	8.175023806	8.235946501	8.25168074	7.991509343	8.616703451	8.467703054	8.648840158	8.990989501	8.468377226	8.556454927	8.359583584	8.27760564
Chchd5	6.806913855	6.618434046	6.773201403	6.688678952	7.005807679	7.308293319	7.251726585	7.205478374	6.927575778	6.813569948	6.715369324	6.846139987
[truncated: 10,588 more rows]
