# Supplementary material for: Dissecting the phenotypic and functional heterogeneity of mouse inflammatory osteoclasts by the expression of Cx3cr1
Source: eLife. 2020 May 13;9:e54493. doi: 10.7554/eLife.54493 (PMC7220377; doi:10.7554/eLife.54493)
Supplement: Source data 3. — Statistics (Deseq) for the comparison of expressed genes in Cx3cr1+ i-OCLs from WT Cx3cr1GFP/+ mice versus Cx3cr1+ i-OCLs from deficient Cx3cr1GFP/GFP mice. In each group, the 4 i-OCL samples have been obtained from 4 different mice. [file elife-54493-data3.xlsx]

## Sheet: Cx3cxr1vsKO_Deseq
Cx3cr1pos OCLs from WT GFP/+ mice versus Cx3cr1pos OCLs from deficient GFP/GFP mice _Deseq
Gene	baseMean	log2FoldChange	lfcSE	stat	pvalue	padj
0610007P14Rik	146.565545701998	-0.171913478263137	0.172324104713736	-0.997617127033502	0.318465052787891	0.790398931120878
0610009B22Rik	144.46468034433	-0.0634696128348315	0.153129687469806	-0.41448274259259	0.678520603024428	0.926177746349514
0610009L18Rik	41.4421330735571	0.540022076745828	0.269869615104456	2.00104808589439	0.0453872081097854	0.471416806556656
0610009O20Rik	302.356272483097	0.0135995836956721	0.125784009603265	0.108118541765098	0.913901660169149	0.983725024576116
0610010F05Rik	475.725628401356	-0.0394579707039284	0.0995181988942987	-0.396490000244457	0.691743583369588	0.930394891105894
0610012G03Rik	747.472294104728	0.0175042299106404	0.181923634546411	0.0962174593437712	0.923347864597859	0.985675661740449
0610030E20Rik	259.13836953224	0.19040277799191	0.151950943006022	1.25305427018221	0.210185956862595	0.708260052264379
0610037L13Rik	194.801838763595	0.025884068220598	0.169628912914371	0.152592313278953	0.878719787122805	0.976406212390727
0610038B21Rik	134.11268619566	0.025104626470455	0.204436338256413	0.12279923757472	0.902266078018734	0.980502671193999
1110002J07Rik	181.389277258262	-0.236910190238542	0.26064087792446	-0.908952548522357	0.363375173893835	0.816997890420706
1110002L01Rik	47.9094519025154	-0.0945215153945307	0.252933595624265	-0.373700912135623	0.708626846633009	0.937009595397262
1110004E09Rik	63.8005896025562	-0.176514184114318	0.221768147708593	-0.795940201233323	0.426066793394598	0.84797417679484
1110004F10Rik	698.844168043516	-0.3092601721155	0.122724236436449	-2.51996004290192	0.011736815675445	0.322776046870184
1110008F13Rik	521.85341683564	-0.0460800699824141	0.112946406432416	-0.407981727245011	0.683287090144136	0.926731302174099
1110008L16Rik	148.180960013378	-0.046083438632236	0.172602693321858	-0.266991422586336	0.789475765236934	0.958765303946085
1110008P14Rik	854.621664085418	-0.1039063332065	0.24865015897446	-0.417881627886564	0.676033665690931	0.92582635805075
1110012L19Rik	67.0932127706097	-0.0991938862162872	0.247289090370479	-0.401125201551264	0.688327947163454	0.92892532821683
1110019D14Rik	37.8431064211187	-0.089085576542824	0.262436149638308	-0.339456194070834	0.734266092051882	NA
1110032A03Rik	129.166285751271	0.264023261296435	0.193413420485999	1.36507208565472	0.172230394533799	0.671506441177159
1110034G24Rik	52.9814897524819	0.206129593331685	0.244293144040156	0.843779689935966	0.398792526842545	0.837236972345073
1110037F02Rik	1123.43563726054	-0.00586915634195041	0.0988830231807653	-0.0593545398710269	0.952669721111211	0.992792037070193
1110038B12Rik	223.353933036123	-0.0358718911391419	0.192487116128091	-0.186359959360973	0.852162490134843	0.971819914777289
1110038F14Rik	126.08784841946	0.0626125146920298	0.166192818275235	0.376746211670447	0.706362217017573	0.93623704527233
1110046J04Rik	30.9006267143498	0.118158455982919	0.29211995167926	0.404486086293256	0.685855307387715	NA
1110051M20Rik	138.943728316855	0.185981767952722	0.176431403001208	1.05413075444086	0.291823057474917	0.773657827830231
1110059E24Rik	182.253412514734	-0.202566544333131	0.166665756756293	-1.21540590146141	0.224211318313486	0.718214926627424
1110059G10Rik	97.982919452181	0.00516936377133632	0.255364616841981	0.0202430698319302	0.983849470157785	0.997567816063321
1110065P20Rik	36.8499229725036	-0.0600576567327932	0.277755765601498	-0.216224698712318	0.828812602106392	NA
1190002N15Rik	350.112912201913	0.214276225346094	0.125803602005455	1.70325985846416	0.0885194491321357	0.566817055839805
1190007I07Rik	43.2705063006814	-0.145507619083858	0.276283257265394	-0.526661009154405	0.598429016810671	0.901751733569397
1500004A13Rik	59.6568903549281	-0.0542255320338511	0.246056971669755	-0.220377954202533	0.825576813373711	0.96624311344422
1500011B03Rik	56.1784602025706	0.246536395562162	0.233240656586796	1.05700437981068	0.290509588552223	0.773257141053508
1500011K16Rik	140.548582391892	-0.250212185078769	0.20754847222554	-1.20556023561988	0.22798709927765	0.721078647210282
1500015A07Rik	62.8034914000072	-0.332505422380524	0.237549861062759	-1.39972897013262	0.161594495096786	0.662288275098873
1600002H07Rik	156.696843749303	-0.0583669957424963	0.167249509409831	-0.348981566214779	0.727103148647264	0.943038040694846
1600002K03Rik	68.3303403157301	0.112262667937796	0.208729425907287	0.537838244175793	0.590688726409418	0.898770948434017
1600012H06Rik	382.122420312716	-0.0416786419506274	0.132247494901578	-0.315156381462241	0.752642921751822	0.950628206029993
1600014C10Rik	166.904497975568	0.123849250944975	0.174945361344304	0.707931036257836	0.47898808504532	0.869870127033298
1600020E01Rik	111.136137144118	0.112482638854904	0.23192486524576	0.484996029794872	0.627679161788212	0.912181672588409
1700001K19Rik	47.7776530312118	0.333819989501073	0.419255053074619	0.796221743907424	0.425903161359235	0.84797417679484
1700003N22Rik	75.2176821113472	-0.0662799829864742	0.22660074121512	-0.292496761621588	0.769906835532038	0.954671589241683
1700008B11Rik	46.6767703068743	0.224790080823658	0.296913994678732	0.757088196758411	0.448997024967374	0.859906565994228
1700008J07Rik	44.0263346291397	0.0921379787985027	0.257895342550507	0.357268874603496	0.720890528898848	0.940737421639288
1700010I14Rik	34.4435566681581	-0.395756335790459	0.293729982118953	-1.34734742750976	0.177868363945997	NA
1700015E13Rik	31.2976623992491	-0.00104341252776488	0.418158486523839	-0.00249525613228323	0.998009075722819	NA
1700017B05Rik	2118.60280322182	0.125781089521903	0.136936218171672	0.918537777669722	0.358337390477622	0.814935394261638
1700020I14Rik	1754.30918863827	0.0402142133915937	0.141923395022532	0.283351545988659	0.776907367581109	0.956212530185575
1700021F05Rik	135.202536338057	-0.339129374280491	0.249654058690649	-1.35839719994584	0.174337682288907	0.672007983144849
1700023H06Rik	102.439934229747	-0.493842349207584	0.296828649196002	-1.66372872209343	0.0961666537450223	0.579771764940604
1700025G04Rik	698.958050527061	-0.0530894790915016	0.111822339854971	-0.474766304839949	0.634953552199434	0.91403594278477
1700025N23Rik	40.2481986526524	-0.268712131511846	0.355303701047151	-0.75628857993851	0.449476193613594	0.860129370826917
1700029I15Rik	38.3400855498276	0.0734227518964327	0.312142172833437	0.23522214646597	0.814036317773044	NA
1700030K09Rik	55.8582580723823	0.031783878514949	0.224621907525323	0.141499459536758	0.887475386974394	0.978419033234799
1700034J05Rik	122.4961788384	0.0516530993401657	0.241323216488102	0.214041152326148	0.830514965824502	0.967248641192754
1700037C18Rik	35.858549012903	-0.0861286930801515	0.278156278268854	-0.309641377200565	0.756833687189516	NA
1700037H04Rik	245.979089317154	0.155350190873107	0.159771580615247	0.972326807276275	0.330887991603917	0.798293377667663
1700052K11Rik	29.3074386122531	-0.423330731207973	0.309434567303272	-1.36807834657035	0.171287553750071	NA
1700056N10Rik	41.7838099827751	0.0668034378438284	0.241625279263696	0.276475367343178	0.782182976609035	0.957488927876767
1700060J05Rik	36.4396279372344	-0.717233643620173	0.45062476431927	-1.59164276003262	0.111464996451368	NA
1700066M21Rik	105.214045907687	-0.291288985494435	0.205562890038035	-1.41703098959417	0.156473867250684	0.656511900482605
1700071M16Rik	131.373146736275	0.261140851539215	0.287325513013981	0.90886760733464	0.363420014270134	0.816997890420706
1700088E04Rik	46.2959715899139	0.190137032405914	0.381805788502823	0.497994106248362	0.618488196305936	0.907856419915079
1700099I09Rik	28.3612380212173	-0.00743200141026416	0.315584917535063	-0.0235499258593004	0.981211614434862	NA
1700101I11Rik	29.2363873157144	-0.0857998885939131	0.341297279834005	-0.25139341466666	0.801509958599941	NA
1700109H08Rik	235.421785417295	0.166227017137849	0.190626551980841	0.872003482256532	0.383206477851588	0.827047775304967
1700112E06Rik	157.90196496505	1.241427990183	0.33360049065314	3.72130145178285	0.000198198667567408	0.084500070366406
1700123O20Rik	246.45393723828	-0.242775938641207	0.1397965698572	-1.73663730726154	0.0824512100551841	0.558453824448056
1810011H11Rik	193.60927472197	0.0362325149577957	0.211832089932862	0.171043560818756	0.864189513678759	0.973344881710843
1810013L24Rik	2030.53162233197	-0.180947537472589	0.114668438932745	-1.57800646068547	0.114564125572416	0.605488975310752
1810014B01Rik	38.0737886327883	-0.041661368023629	0.271368321157872	-0.15352332890541	0.877985594571628	NA
1810022K09Rik	84.6462093055584	0.198485642935175	0.25586188315847	0.775753076171339	0.437894794691515	0.854795840915614
1810026B05Rik	685.342223891913	0.0711552648120913	0.185396310076419	0.383800868435632	0.701126044353916	0.933679368705562
1810026J23Rik	629.138297766904	-0.0462359980143488	0.114084506175377	-0.405278504192955	0.685272805344691	0.927344787144602
1810030O07Rik	467.32577065825	-0.0823214528921704	0.107979636098775	-0.762379425106286	0.445833582436337	0.859302757799466
1810032O08Rik	43.2837862316052	-0.0792311240435557	0.278518347989527	-0.284473624863433	0.776047443761886	0.956212530185575
1810034E14Rik	60.0414260714366	-0.0438160962688407	0.292610990814631	-0.14974179933179	0.880968328855821	0.97726884435452
1810037I17Rik	262.815209181799	-0.0207231785046982	0.187415891492406	-0.110573219483567	0.911954784988956	0.983290815867665
1810043G02Rik	138.242013447956	0.385566810872402	0.168640186464261	2.28632818165268	0.0222350663808959	0.389841285312667
1810043H04Rik	77.7809055584852	-0.134439322613295	0.184589882899144	-0.728313602575663	0.466421637432324	0.866007262963103
1810055G02Rik	86.3449262573314	0.227846786294116	0.215276607934348	1.05839082323149	0.289877301425286	0.772636755968948
1810058I24Rik	697.915981141727	-0.00734328534015427	0.136815835660857	-0.0536727733648978	0.957195875231499	0.993893237941803
2010107E04Rik	530.786129150333	-0.16799421746815	0.153402409948144	-1.09512111005908	0.273463581458557	0.758036443177802
2010111I01Rik	1127.56355972875	0.0829867783727809	0.148838828731384	0.557561350624108	0.577143954557738	0.894469677173
2010315B03Rik	366.650301915219	-0.146717654060252	0.147239368358779	-0.996456692905284	0.319028298974893	0.790398931120878
2010320M18Rik	66.2243242367238	0.0308495172566062	0.245456110967471	0.125682416848422	0.899983320809768	0.979979945483724
2210008F06Rik	66.8087933724789	-0.263846867636275	0.415353967220899	-0.635233772778564	0.525275959684511	0.882017382914846
2210013O21Rik	90.4882772129409	0.145902348012544	0.196996811850212	0.740633041937156	0.458915968031211	0.863143600297358
2210016F16Rik	545.666997918371	-0.106596078009718	0.122275307463636	-0.871771089526144	0.38333326930924	0.827170806685312
2210016L21Rik	235.687283258104	0.12755311917129	0.144696556404851	0.881521456629591	0.378035645817333	0.823989795857457
2210406H18Rik	88.5709298740715	0.183771683050219	0.219944561673062	0.83553638086032	0.403415771910236	0.838606407580697
2210408F21Rik	60.592560266591	0.18123315711495	0.269459779855191	0.672579622874869	0.501214769051276	0.876161312177623
2210408I21Rik	65.9092292482904	-0.108298023987967	0.239611265232644	-0.451973841391882	0.651287827313457	0.918598849608919
2300009A05Rik	84.8060104594993	0.0557918984608623	0.283170215426165	0.197026012700159	0.843807181563242	0.970387252244778
2310001H17Rik	158.571386068538	0.107636618879756	0.201644915009803	0.53379287483904	0.593484843936982	0.899888817741872
2310009B15Rik	43.9162266375822	-0.262307047235857	0.2910255307196	-0.901319710979537	0.367418356562093	0.818022392212314
2310011J03Rik	346.472813342295	-0.0726962124409688	0.132122546371489	-0.55021806979536	0.582169811154627	0.896062442990182
2310015A10Rik	77.9758561316716	0.0472802221500527	0.295915519726134	0.159776081341762	0.873057466325529	0.97552320403059
2310022A10Rik	961.385779794957	-0.0839306391196317	0.114519767399134	-0.732892155003333	0.463624208264079	0.865576867283427
2310022B05Rik	166.681302404841	0.0938838054654232	0.142474492224548	0.658951676188161	0.509926800336485	0.879340012178426
2310033P09Rik	108.232069232168	0.18262530102124	0.177865778119489	1.026759070531	0.304533926548391	0.782153982963831
2310035C23Rik	999.572119500969	0.0623243907044724	0.0982560150018961	0.634306110453082	0.525881069515102	0.882017382914846
2310036O22Rik	786.615905608152	-0.0146007957357403	0.104010465321779	-0.140378140705068	0.888361228015937	0.978419033234799
2310039H08Rik	67.2273697303313	-0.480744362663343	0.224323411552798	-2.14308599951991	0.0321061934527909	0.420385943342777
2310043M15Rik	33.5151745683096	0.00249023008314026	0.344369652761523	0.00723127041878093	0.994230331261794	NA
2310043P16Rik	67.886772823687	0.194578301847503	0.298359152523204	0.652161330403196	0.514297102943591	0.879576510212934
2310057M21Rik	343.925517869922	-0.107302679441865	0.11039073291184	-0.972026153024628	0.331037537902106	0.798329183469718
2310058D17Rik	82.0543650911599	0.00510441935500447	0.264365237940061	0.0193082093348513	0.984595235048153	0.997982497094729
2310061I04Rik	137.319737939739	0.462687683623745	0.239443159197111	1.93234872599914	0.0533164780838818	0.493570497748061
2410002F23Rik	226.825016875187	-0.0293346825863442	0.191129790108326	-0.153480431123365	0.878019421167652	0.976406212390727
2410004B18Rik	158.286493880207	-0.0203008558850707	0.20246640398967	-0.10026777522115	0.920131740182375	0.985279828768369
2410006H16Rik	254.429149760547	0.150340487169207	0.221073296184052	0.680048154907151	0.496473970402215	0.874934465923885
2410015M20Rik	488.234112455496	-0.172793943872944	0.146956214420957	-1.17581923672839	0.239667117597095	0.729338727824997
2410016O06Rik	151.892708834295	-0.229546820381263	0.164745856149902	-1.3933389630899	0.163517313589779	0.664154567883581
2410022M11Rik	67.1197620735942	0.440157562777114	0.268314006406837	1.6404568985106	0.100910203195537	0.587968070310187
2410089E03Rik	401.809904564306	0.180181255473173	0.129606909045533	1.3902133520511	0.164464100136064	0.664868000993441
2410131K14Rik	750.188605182812	-0.0977591066123766	0.128142906281882	-0.762891286368452	0.445528233274157	0.859302757799466
2500002B13Rik	84.3376018251217	0.124504195848538	0.25959767953874	0.47960442508485	0.631508699230499	0.912944269438469
2510002D24Rik	54.550720987532	-0.0283488190096786	0.230471056943492	-0.12300381395235	0.902104077806775	0.980502671193999
2510009E07Rik	428.631201939977	0.113225539135143	0.11374355603283	0.99544574729546	0.319519518266144	0.790398931120878
2510016D11Rik	124.564056354567	0.0697326161714684	0.192131840471669	0.36294148851268	0.716648593496241	0.939249975080009
2510039O18Rik	1578.73319136805	0.00738729728836548	0.10534712163148	0.0701233899318803	0.944095450051258	0.991279447075315
2610001J05Rik	568.655469288723	-0.135343775210258	0.115678712205293	-1.16999725040218	0.242002075356452	0.732037017361752
2610002M06Rik	275.674033753153	-0.0516914529495635	0.141759684608592	-0.364641421799768	0.715379090555185	0.938846881498248
2610005L07Rik	57.0571102395801	0.270646742077964	0.285992254605854	0.946342908660102	0.343973714529087	0.805919077881303
2610008E11Rik	103.892852110654	0.0247329887726309	0.172209168903767	0.143621788143302	0.885799134581813	0.97813905548416
2610012C04Rik	28.5890108612195	-0.518014828142827	0.307752405525884	-1.68321942848066	0.092332621087959	NA
2610020C07Rik	102.178840927838	0.274861817255773	0.179056485903747	1.53505647041195	0.124769957464149	0.621720544082125
2610020H08Rik	95.924441385186	0.079682180515239	0.211602686468469	0.376565070345232	0.70649684986693	0.93623704527233
2610021A01Rik	129.127395611492	-0.128761239808152	0.179293912539861	-0.718157342790575	0.472660276534933	0.867310374465193
2610024D14Rik	117.093081863343	0.044323598979026	0.230790007772735	0.192051637793056	0.847701757088528	0.971113683981483
2610037D02Rik	90.4516993562097	0.0106839001402466	0.252915232300235	0.04224300783736	0.966304977844909	0.995287989169824
2610044O15Rik8	69.647096689903	-0.0171551159366627	0.215386737204419	-0.0796479679265541	0.936517243482635	0.989806567969854
2610301B20Rik	97.8231343087617	-0.161210911113389	0.174003917634408	-0.926478629361102	0.354197298110134	0.813206933776762
2610306O10Rik	54.2849487401341	0.356380314242031	0.37708382175327	0.945095741803568	0.344609999075014	0.805919077881303
2610318N02Rik	35.2774199928596	0.250991781214092	0.319178076744735	0.786369113361208	0.431651272982828	NA
2610507B11Rik	9452.08872719669	0.127689886229701	0.102633269926456	1.24413736716369	0.213449010420341	0.708548838668287
2610507I01Rik	73.7026367319547	0.279317864144038	0.242160506044257	1.15344103258931	0.248729407738953	0.736093381400618
2610524H06Rik	29.9452625244726	-0.336293870067937	0.329902044704619	-1.01937491890673	0.308025008652658	NA
2700038G22Rik	55.1933318193039	0.0352685312910313	0.29520445351896	0.119471542080804	0.904901784662238	0.980958556210125
2700049A03Rik	216.120790586077	-0.406628651603816	0.158222327481847	-2.56998274564296	0.0101703580367147	0.297552751109153
2700060E02Rik	442.90864063965	-0.110589290568715	0.151673182770023	-0.729128831801448	0.465922859655015	0.866007262963103
2700062C07Rik	73.3083430318903	-0.264425489502728	0.199409085457602	-1.32604534490456	0.184824678045813	0.683747474680719
2700081O15Rik	68.9353633533996	-0.0664833640338412	0.227041669150518	-0.29282450346049	0.769656297748334	0.954671589241683
2700094K13Rik	210.393788691838	-0.374619123865511	0.197296081444485	-1.89876616465351	0.0575952277537645	0.5044635638004
2700097O09Rik	50.5474576165391	0.164516328763782	0.292131755540519	0.563157978013668	0.573327314613424	0.894282609432778
2700099C18Rik	46.8585516883462	-0.583028396986252	0.375995799686147	-1.55062476089606	0.120991634734929	0.618558440546841
2810002D19Rik	47.1574176807771	-0.177507307234497	0.241723417500667	-0.734340549500163	0.462741210110746	0.864848874715023
2810004N23Rik	223.998570498022	0.018760348107259	0.122757817249318	0.152824060639309	0.878537022965402	0.976406212390727
2810006K23Rik	95.7022189207028	-0.0756594820602333	0.185978736230804	-0.406817916895284	0.684141726426773	0.927075784078718
2810013P06Rik	190.63212537705	0.189173773920032	0.225323158199473	0.839566493882359	0.401151492287574	0.837337859186443
2810021J22Rik	64.2907999583227	-0.257587846032903	0.209541780951332	-1.22929109824035	0.218962683632735	0.713388196744856
2810025M15Rik	323.532627148881	-0.346197862747108	0.293443277146524	-1.17977779594604	0.238088602879488	0.728228394489874
2810402E24Rik	50.6792838103653	-0.217574985134921	0.24655975571135	-0.882443221551692	0.3775371713136	0.823970792276835
2810403A07Rik	672.621435800291	0.343936028715899	0.109569404898782	3.1389787051743	0.00169537767743516	0.179422425094991
2810403D21Rik	28.0961012111614	-0.145167339412259	0.337087688496918	-0.430651561495954	0.666721744058654	NA
2810405F17Rik	32.4616142131794	0.0148390386419199	0.333809980047124	0.0444535500101737	0.964542877068871	NA
2810417H13Rik	445.891054223431	-0.634174701246453	0.205471539007933	-3.08643573853782	0.00202571727488075	0.188960506087171
2810428I15Rik	239.179683516016	-0.0219800851326127	0.136180115006482	-0.16140451292442	0.871774812477549	0.975377275089333
2810455O05Rik	30.6283066007782	-0.153534365989767	0.297205452845481	-0.516593368391496	0.605440045994382	NA
2810474O19Rik	4315.65639352954	-0.063257106200896	0.169993564265682	-0.37211471195481	0.709807443076799	0.937628143493461
2900026A02Rik	75.199406598675	0.240012276373779	0.231343217578562	1.03747271645115	0.29951560462683	0.778763364864222
2900076A07Rik	28.3214691980299	-0.0322099546212207	0.334449391238521	-0.0963074099251368	0.923276426176245	NA
2900089D17Rik	85.117200667242	0.240039360298875	0.240593410659935	0.997697150726028	0.318426235274867	0.790398931120878
2900093K20Rik	31.4320630009815	-0.245226089268369	0.339402695900809	-0.72252251449422	0.469973288211737	NA
2900097C17Rik	679.124568621407	-0.0122093068969716	0.116229864314043	-0.105044490665351	0.916340505534724	0.984296265193965
3010003L21Rik	32.0035083565684	0.111452347406448	0.31412389933961	0.354803781694919	0.722736595087598	NA
3010026O09Rik	114.275946450435	0.235751773958621	0.249839291308524	0.94361368351583	0.345367097194549	0.805919077881303
3110001I22Rik	89.3730052225381	-0.0662078156749393	0.183216794764611	-0.361363245984081	0.717827919736892	0.939445726645748
3110002H16Rik	745.79193917034	0.229780709069529	0.108524040910581	2.11732540680879	0.0342322400628317	0.429996176493392
3110040N11Rik	77.9953956707162	-0.0114814609907531	0.207644693891205	-0.0552937846645327	0.955904413712067	0.993630170298148
3110043O21Rik	1698.21203022518	-0.151556571186071	0.129994660173103	-1.16586766705845	0.243667953351097	0.732913147829857
3110056K07Rik	58.7854013195302	0.323983208936763	0.228600932920635	1.41724359912933	0.156411718736618	0.656511900482605
3110062M04Rik	181.522206687619	-0.101590197144794	0.156932889724237	-0.647348030889563	0.517406722332078	0.882017382914846
3110082I17Rik	202.009708135594	-0.151925115578624	0.166879762178838	-0.91038669755421	0.362618610624385	0.816997890420706
3830406C13Rik	295.106853748665	-0.179084004892807	0.155080775919764	-1.15477888107461	0.248180987544968	0.736093381400618
4632404H12Rik	91.3281460333531	-0.0354830046682691	0.212778331172412	-0.166760423736558	0.867558559844791	0.974198227290118
4632415L05Rik	118.076809877058	-0.414925846830555	0.191740436902854	-2.16399760808295	0.0304645329769694	0.412681267858307
4632427E13Rik	325.581263084267	-0.154417308754123	0.195666900305346	-0.789184621993547	0.430004108594253	0.85109229437348
4732440D04Rik	76.4868892154015	0.15056119067851	0.240224771889298	0.626751310842714	0.53082226379222	0.882198021975489
4732487G21Rik	74.3110411781749	0.192616459461036	0.227012035323149	0.848485672518855	0.396167548311476	0.835984880299822
4833418N02Rik	130.301938502043	0.366410542445281	0.244024975351227	1.50152885751921	0.133218828547468	0.63060813689023
4833420G17Rik	625.668060089813	-1.01540137402754	0.2770330607332	-3.66527147099396	0.000247076356313113	0.084500070366406
4833421G17Rik	32.1009387787347	-0.0188638518439818	0.346529775466001	-0.054436453025182	0.956587436584366	NA
4833439L19Rik	689.74562234671	-0.0256705352062329	0.0910755014392709	-0.281859938189305	0.778050909231572	0.95649911050407
4833445I07Rik	88.0084702856582	0.192932085299436	0.227804747479937	0.846918632880678	0.397040475969396	0.836346323381064
4921511C10Rik	38.545979617901	-0.170626645463392	0.291148622265916	-0.586046549475178	0.557844233784411	NA
4921524J17Rik	85.3034702171518	-0.296422644381558	0.202841376052121	-1.46135196945908	0.14391887458751	0.641546402816579
4921531C22Rik	117.873275815312	0.394950184991561	0.290592052533144	1.35912245895477	0.174107787130131	0.671890486576448
4930402H24Rik	635.661170094972	0.163919745098735	0.122523355819281	1.33786529109203	0.180940353415707	0.678054381611246
4930404N11Rik	120.321158080503	0.299792404397169	0.233279145780193	1.28512303744308	0.198749292384172	0.696687392374735
4930405O22Rik	60.4183290138209	0.326156624163945	0.242297878444055	1.34609773002718	0.178271000633418	0.67617477456253
4930412M03Rik	61.6369573595865	0.288276388304568	0.253799233118986	1.13584420552374	0.2560217726063	0.740152700171336
4930413G21Rik	33.6863075678491	-0.185645310202208	0.295272704597112	-0.628724928894167	0.529529154776988	NA
4930427A07Rik	114.371807599583	-0.608003589477023	0.229194239024508	-2.65278740017548	0.00798301345482592	0.283649450664517
4930430E12Rik	317.892815927305	-0.0655366593135232	0.195692264941082	-0.334896524056557	0.737703144256047	0.946817711044993
4930430F08Rik	75.1381798691328	-0.116175150430971	0.200229402713168	-0.580210243134941	0.561772846905335	0.893022133018112
4930444A19Rik	28.0113535461355	0.390690349348763	0.316400235581064	1.23479790914589	0.216905725730552	NA
4930453N24Rik	350.486751252728	-0.186837760628059	0.171694090649854	-1.08820146296758	0.276506179038362	0.760777098454434
4930469K13Rik	46.8874344232341	0.00330356519291504	0.240834714773427	0.0137171470318262	0.989055643381367	0.999115007797442
4930503L19Rik	229.080661860507	-0.130210014128254	0.194416855750582	-0.669746528023786	0.50301938577485	0.876161312177623
4930513N10Rik	37.3124821451779	0.377439921560957	0.263288459842504	1.43356044464211	0.151697738216988	NA
4930513N20Rik	29.0775830524507	-0.206209349906561	0.315592777826403	-0.653403260134142	0.513496337614662	NA
4930517G19Rik	120.413997834214	0.118487429149038	0.246449254195423	0.480778201321248	0.630674144657133	0.912944269438469
4930523C07Rik	552.710289301174	-0.161088002811379	0.217448139304022	-0.740811134677755	0.458807962928869	0.863077413838421
4930533B01Rik	54.4073760150194	0.112792615974886	0.265661189168938	0.424573180326914	0.671147847554471	0.924046397614489
4930551O13Rik	41.9421898250779	0.207048947432628	0.307592553810574	0.673127307106844	0.500866302707961	0.876071911528097
4930556M19Rik	59.527465036986	0.0909361794540921	0.299551140515048	0.303574806284284	0.761451847937557	0.952417099067698
4930565N06Rik	121.212141901126	0.216088105579825	0.181064588127102	1.19343107238693	0.232700591879809	0.725651174835932
4930577N17Rik	87.1607635588643	0.000367297646834946	0.170901728548397	0.00214917455753487	0.998285208122163	0.999799152536572
4930579G18Rik	75.574367755321	0.129989228851059	0.186376498277495	0.697455044238024	0.485518064147448	0.871379635557166
4930579G24Rik	60.7112293601911	-0.710435003706104	0.256543711074394	-2.76925519137004	0.00561846095184117	0.260694847290098
4930589L23Rik	35.6783897089767	-0.0692268128242402	0.364485713464087	-0.189930113217075	0.849363895011672	NA
4930594C11Rik	32.2599084362273	0.374939626136232	0.360833034755861	1.03909451192548	0.298760783082527	NA
4930595D18Rik	119.770367816916	0.29394484158996	0.173215598896933	1.696988282013	0.0896988759454606	0.566817055839805
4930596I21Rik	58.6762647433355	-0.026581109836769	0.283580977941403	-0.0937337547452197	0.925320655900922	0.986762147302941
4930599N24Rik	37.7068310192101	-0.2696939292162	0.258850998909382	-1.04188869408464	0.297463286448925	NA
4931406C07Rik	402.557266141829	0.0170350644125692	0.119141294388027	0.142982032384912	0.886304371461461	0.97813905548416
4931406P16Rik	458.06439864371	0.0332035802234208	0.12062344892247	0.275266380791036	0.783111591349146	0.957522353235139
4931413K12Rik	93.9255983380083	0.375864444156501	0.272374972722996	1.3799522048553	0.16760136127663	0.668309685603534
4931414P19Rik	53.4807000967156	0.238049079320691	0.235442491809336	1.0110710156494	0.311982441622278	0.788302681847978
4931422A03Rik	49.1394885821607	0.280082153189169	0.272017228273273	1.02964858133101	0.303175001029473	0.782074627805898
4931428F04Rik	47.3055969447064	0.279940173142994	0.246613205729969	1.13513861641909	0.256317243798709	0.740465096452865
4931440P22Rik	219.34201365039	0.0815080189826485	0.198543578504186	0.410529615698097	0.68141748308799	0.926177746349514
4932438A13Rik	2839.01757546236	0.0853073603508942	0.0830730618206974	1.026895584215	0.304469633833509	0.782153982963831
4932441J04Rik	65.2440664565921	0.100688829698693	0.238857769583466	0.421543037407908	0.673358591394089	0.925692343283941
4932442E05Rik	115.357228403629	-0.0571724751507973	0.218247302012561	-0.261961887379973	0.793350825800913	0.959062651939419
4933400F21Rik	192.012583443794	-0.215402889068128	0.201200083188802	-1.0705904572912	0.284353616107536	0.768454950233157
4933406P04Rik	27.9651680610366	-0.134820262097445	0.348178455121402	-0.387215981099222	0.698596320004215	NA
4933421O10Rik	93.7930657762347	0.384668086156257	0.277832702865518	1.38453134634209	0.16619581672057	0.667767154976635
4933423P22Rik	580.20439606673	0.205140317469963	0.174423743181152	1.17610317109701	0.239553650898761	0.729180643067028
4933427D14Rik	132.710179636161	-0.0586643841189942	0.194346779180752	-0.301854161752964	0.762763240312025	0.952704812861294
4933433G15Rik	51.1859717980382	0.3133596944456	0.271102851306805	1.15587015383683	0.247734272343026	0.736093381400618
4933434E20Rik	533.700932679235	-0.195327086313423	0.103177572040054	-1.89311574648797	0.0583424785587541	0.505506870143942
4933439C10Rik	116.154089017434	0.31486177302742	0.191260645395412	1.64624443453318	0.0997134443293601	0.583840787185765
4933439K11Rik	46.4216131452726	-0.0505089192491533	0.300265870091444	-0.168213987269919	0.866414937488354	0.973792552062343
4933440N22Rik	83.8475382712476	0.00567038403192213	0.245384416928407	0.0231081667813344	0.981563991277291	0.997201371986595
5031414D18Rik	38.6889923220874	0.475179277854263	0.397756436915898	1.19464886989305	0.232224246999361	NA
5031425E22Rik	334.347038097997	0.0675843933530752	0.169068233063224	0.399746257049966	0.689343418165787	0.929449358318105
5031434O11Rik	69.3421451484811	0.323804293323336	0.222414982365404	1.4558564799891	0.145432298511698	0.643901359675526
5031439G07Rik	9264.80515623203	0.0260071293585974	0.149678062716757	0.173753781192451	0.862058969031854	0.973234113718884
5330406M23Rik	563.438577574447	-0.0530229887874572	0.128690757142168	-0.412018624840954	0.680325772008004	0.926177746349514
5330438D12Rik	33.7695589061927	-0.0427051256753656	0.31167097928125	-0.137019897630022	0.891015067412672	NA
5430427O19Rik	161.368961441075	-0.0492509469643586	0.175016563761379	-0.281407347429746	0.778397983296843	0.956594224574129
5430434F05Rik	139.380622659607	0.282231094906086	0.220780595003922	1.27833288474049	0.201132077522783	0.6999467160533
5530601H04Rik	100.232185673787	0.173637156703546	0.18771713283573	0.9249936544444	0.354969208209764	0.813464390693725
5730409E04Rik	148.6035135947	0.084356698480656	0.161946537088325	0.520892264801242	0.602441824221602	0.904357236039896
5730455P16Rik	231.935456530313	-0.0836618756750081	0.135153400932159	-0.619014209764524	0.53590699787663	0.884683652674293
5730480H06Rik	120.185138777324	-0.0743039337227886	0.169450356676856	-0.438499718619578	0.661024074082908	0.921453410573292
5730507A11Rik	37.611560097532	0.0274366209221629	0.335392551169989	0.0818045028920665	0.934802175288307	NA
5730508B09Rik	361.30382514286	-0.128207286275821	0.208148190101753	-0.615942354402155	0.537932566415887	0.886412355711485
5830417I10Rik	112.876263243009	0.278630949584384	0.17458915409863	1.59592359000135	0.1105058539989	0.597979959590197
5830432E09Rik	330.714025037002	0.0929950953419542	0.257808967226217	0.360713191408717	0.71831386240779	0.939961825029757
5930403N24Rik	46.560272891453	0.222893096329591	0.38122235209798	0.58468003017909	0.558762884180059	0.891545322751228
5930420M18Rik	48.5697366560792	0.0759315505474831	0.291848630746929	0.26017442793256	0.794729228742652	0.959062651939419
6030400A10Rik	165.097838005213	-0.0875978393612834	0.152455175800285	-0.574580947491318	0.565574740500197	0.893199739973878
6030458C11Rik	372.087988376614	-0.0685506257565694	0.122822792260131	-0.558126260567202	0.576758169600677	0.894469677173
6230400D17Rik	45.903255622877	0.195438473663927	0.263164995840926	0.742646160213733	0.457695933913447	0.862538989177867
6330403L08Rik	205.176503351363	0.134592516173745	0.173830070162606	0.774276372596769	0.438767372882894	0.854817500128361
6330408A02Rik	43.3237482596595	-0.361513970771074	0.326043905087489	-1.10878923092909	0.267521117268999	0.749451147007668
6330549D23Rik	65.837751816604	-0.400376386541211	0.204494815678341	-1.95788037566185	0.0502440511449128	0.48071588598842
6430511E19Rik	75.4638098592008	-0.0595493251248136	0.251720895068773	-0.236568859762492	0.812991280805289	0.962696739938401
6430548M08Rik	856.997648857808	0.246998768054548	0.123923198727457	1.9931600425984	0.046243924952145	0.474438526566058
6430573P05Rik	47.5032116466524	0.0378514975842797	0.26645109422431	0.142057955117327	0.887034228245949	0.97813905548416
6430590A07Rik	31.2594574687786	-0.125061486646111	0.345949205228077	-0.361502453990784	0.717723870828688	NA
6530402F18Rik	39.8622693516085	0.567824899034304	0.325606533083798	1.74389897418971	0.0811767075500088	0.556512378561821
6530409C15Rik	50.6193292812699	-0.201890224237354	0.230512912724329	-0.875830433320648	0.381122222808396	0.825673227217677
6720427I07Rik	94.1759375147867	-0.234201094339315	0.205575154185477	-1.13924805391614	0.254599707859834	0.739545779034598
6720475M21Rik	45.1577674027466	-0.24212020577456	0.261824486702393	-0.924742405968199	0.355099915527101	0.81349039403609
6820402A03Rik	44.5116511146706	0.166167120472575	0.281342166261737	0.590622879892051	0.554773131134429	0.890276815948786
6820431F20Rik	70.2923516914523	0.306067046231978	0.202897351264624	1.50848221686639	0.131431154670922	0.629423496439573
8030453O22Rik	41.4032254354127	0.0955382298443966	0.305489590706952	0.312738085848705	0.754479657589676	0.951265544241083
8030462N17Rik	340.049531776287	-0.113278572486788	0.111221551324665	-1.01849480732487	0.308442867302875	0.785608260028903
8430408G22Rik	61.0914599090802	-0.000658637398811523	0.209453771007473	-0.00314454781904129	0.997491017979359	0.999799152536572
9030617O03Rik	1247.92216642638	-0.0331131664746041	0.0983866138154485	-0.336561704793673	0.736447328716216	0.946245006750494
9030624J02Rik	1653.79858246422	-0.00496050968288544	0.103153195680243	-0.0480887639997324	0.961645500875941	0.994970681030248
9130008F23Rik	61.9215785273604	0.0737875760252009	0.255684348246738	0.288588552765049	0.772896256531296	0.9556074995521
9130011E15Rik	414.518394747887	0.0819751684727286	0.106363863982083	0.770705062826014	0.440881770356909	0.856403084896827
9130019O22Rik	40.0534223129188	0.0745823839631622	0.289494200050884	0.257629976524756	0.796692492538767	0.959062651939419
9130023H24Rik	58.585657916543	0.0958147171353156	0.241788808393714	0.396274408943265	0.691902603962802	0.930394891105894
9130230L23Rik	88.6273632623007	0.161090726247809	0.348956865568938	0.46163506766135	0.644343042453017	0.915354708771883
9130230N09Rik	87.4891165082287	0.144597108926499	0.253587168054836	0.570206726293152	0.568537494529809	0.894189389398781
9130401M01Rik	51.6019868866147	0.0110221739402965	0.253047569674218	0.0435577150750223	0.96525695816648	0.995246688432371
9230112E08Rik	104.551274516587	0.179599987436525	0.210447365077523	0.853419986372199	0.39342644191037	0.83478327565115
9330020H09Rik	30.4996707292587	0.193625614350995	0.361783317747987	0.535197740891614	0.59251312829474	NA
9330151L19Rik	36.5851120051826	0.0297545912720926	0.277226770828556	0.107329429921808	0.914527637687431	NA
9330159M07Rik	48.7496348075323	0.124994961137873	0.265078764755858	0.471538945237638	0.637255915113656	0.914785417132227
9330160F10Rik	39.3036604750683	0.452246558862332	0.288888866336868	1.56546897980823	0.117472985348283	NA
9330162G02Rik	848.07498526152	0.165437676371472	0.166236103488467	0.995197029404323	0.319640446299274	0.790398931120878
9330175E14Rik	29.8660514377323	0.180984166405406	0.43012715141929	0.420768988444959	0.673923778910999	NA
9330182L06Rik	41.3680783272443	-0.165185572890144	0.363112953513997	-0.454915120189388	0.649170304620507	0.917664355476072
9430015G10Rik	134.066754746813	-0.194519780796405	0.197516726737451	-0.984826875219388	0.324709117110985	0.794674655338725
9430016H08Rik	147.504715031011	-0.0703383306231817	0.15853433825675	-0.443678835743881	0.657274799133867	0.919642961258458
9430018G01Rik	35.3933301514785	0.108832163760821	0.338295257845125	0.321707624440439	0.747674201216231	NA
9430020K01Rik	79.5009503462584	-0.250832783296659	0.303769155483926	-0.825734867310886	0.408954508674373	0.839656641489234
9430025C20Rik	33.3204091569999	0.778199674333474	0.307029422175026	2.53460944824321	0.0112572754660609	NA
9430034N14Rik	240.880541007554	0.0563582598775053	0.198905341744902	0.283342113304253	0.776914597636209	0.956212530185575
9430038I01Rik	188.562313525045	-0.128703916519924	0.158744539141215	-0.810761221873795	0.417502807657157	0.844949652122102
9430053O09Rik	45.4956152916386	-0.226951563247872	0.274656457720536	-0.826310676003823	0.408627878910615	0.839285270483232
9430076C15Rik	2019.38726826648	0.214705116478705	0.151106801532494	1.4208832051318	0.15535071628323	0.655018479185446
9430091E24Rik	58.9087571567731	0.0253934018902617	0.215598984058454	0.117780712191932	0.906241412601043	0.981442785873656
9430092D12Rik	37.9869244955544	-0.149113822540883	0.342001870519696	-0.43600294441166	0.662834593284189	NA
9530003O04Rik	29.4473886860582	-0.240279148128134	0.363248187256198	-0.661473770710563	0.508308530148237	NA
9530068E07Rik	1941.50718049992	-0.0684110169374887	0.0966874697246581	-0.707547908041304	0.479226051749684	0.870058100129066
9530082P21Rik	103.105124964521	0.17310543718339	0.184626685915308	0.937597056055032	0.348451524872751	0.808310193785867
9530085L11Rik	33.9007191243977	-0.16849932347121	0.328948760879841	-0.512235775020171	0.60848600810596	NA
9630010A21Rik	70.2997477326743	0.390498124135364	0.229713539364544	1.69993516801665	0.0891431209655598	0.566817055839805
9830144P21Rik	212.108513262643	0.343494184960778	0.205095903056342	1.67479788646201	0.093973893719942	0.576538593303557
9930014A18Rik	37.5457597907833	-0.440619766521514	0.421405339083093	-1.04559607023544	0.295747564406816	NA
9930021J03Rik	573.232059892321	0.082602115339358	0.114013531389426	0.724493964292899	0.468762531319954	0.866404124284443
9930022D16Rik	52.7890816816604	0.032024763561135	0.26726133034581	0.119825653489407	0.904621259808569	0.980833863200784
9930104L06Rik	91.4518395123603	-0.148189353977083	0.225436319654477	-0.657344629313549	0.510959346077629	0.879486029854958
9930111J21Rik1	126.544468884744	-0.000159592596876514	0.220252409135675	-0.000724589562960038	0.999421861225385	0.999855680944743
9930111J21Rik2	314.425666569049	-0.0181159779887507	0.222885041216646	-0.0812794698552331	0.935219700644602	0.989746349262542
9930120I10Rik	40.8556521682216	0.135679235878965	0.336169607293265	0.403603517198991	0.686504298874262	0.9278542886977
A130010J15Rik	61.9677735406499	-0.0206263796613019	0.200460063119292	-0.102895206857374	0.918046141883701	0.98458017121548
A130048G24Rik	111.529075922815	0.23470619017359	0.248202002699352	0.945625690449768	0.344339536073119	0.805919077881303
A130050O07Rik	34.727727893293	-0.0928780721020064	0.279718596465351	-0.332041105867308	0.739858220124268	NA
A130051J06Rik	113.838523829437	0.195055210501262	0.178955442052277	1.08996523528064	0.275728458266405	0.759775520180688
A130071D04Rik	880.94400523742	0.0968487773981052	0.183648012535709	0.527360879439267	0.597943004781272	0.901565686146123
A230046K03Rik	1362.54404212406	0.0774131192339243	0.0954856856551475	0.810730097425352	0.417520685247975	0.844949652122102
A230050P20Rik	182.802444993813	0.158395717183026	0.155077281420872	1.02139859386075	0.307065631274391	0.784795108805723
A330023F24Rik	183.051596541601	0.490731290788707	0.153918480633881	3.18825451477779	0.00143134488855004	0.16633069572533
A330074K22Rik	85.7559233731981	0.25986859759417	0.249881361590982	1.03996791093021	0.298354809300323	0.778405327970325
A430005L14Rik	205.382628997887	-0.120905198052697	0.137765481876667	-0.87761605015788	0.380152116174882	0.825673227217677
A430027C01Rik	54.4603777454006	-0.0269538205409913	0.222895544847381	-0.120925793108368	0.903749812138502	0.98060660227734
A430033K04Rik	44.4229440398444	-0.468944629133021	0.346038777136173	-1.35517941952639	0.175360400057165	0.673399433287697
A430057M04Rik	33.8131557928432	0.344460279528951	0.298014083184773	1.15585235384792	0.247741554294328	NA
A430110C17Rik	180.647115365907	-0.0739866504441173	0.229149105179532	-0.322875580884991	0.746789470317165	0.948531460744681
A4galt	29.6242325276526	0.598232938957415	0.31733247811302	1.88519291348536	0.0594037972350268	NA
A530013C23Rik	120.771759479232	0.294820330920585	0.215903561584907	1.36551860819879	0.172090108582044	0.671506441177159
A530017D24Rik	128.494625968708	0.0314909026175069	0.189888796724703	0.165838654837345	0.868283925141198	0.974198227290118
A530041M06Rik	35.7716639596401	0.179616467986717	0.345046087869111	0.520557903136848	0.602674781381157	NA
A530064D06Rik	52.8620777539757	0.453367189328211	0.252168674634134	1.79787275317203	0.0721971748154808	0.53703120248297
A630001G21Rik	207.869023293622	0.304808163505646	0.186510244341197	1.63427035647457	0.102202095178232	0.589033494848096
A630033H20Rik	560.006731749785	-0.290235303519231	0.160954568680434	-1.80321258289646	0.0713548350912003	0.5339115661079
A630081D01Rik	766.751279826242	-0.224517182394149	0.160165064492998	-1.40178623287705	0.160979090765341	0.661537246920411
A730017L22Rik	56.9676549493248	-0.170304691481895	0.243667630200965	-0.698922098685968	0.484600716188985	0.870797794033905
A830010M20Rik	50.8855662636034	0.108203412424563	0.259737833279275	0.416587029538436	0.676980498109587	0.92582635805075
A830080D01Rik	222.07133484919	-0.0056855425393333	0.153801304829665	-0.0369668030165937	0.970511474994132	0.996640797379354
A930004J17Rik	244.444165849072	-0.00490566645679768	0.158959235312374	-0.0308611603922065	0.975380264675312	0.997011087024843
A930006L05Rik	65.5250680696187	0.133155964220092	0.217022114782187	0.613559426207475	0.539506502020069	0.886471530712798
A930007I19Rik	72.7634428102913	0.221065086911668	0.28883929610955	0.765356687574196	0.444059176766152	0.858001549548994
A930011G23Rik	5272.2322009374	-0.0517229500069256	0.124189761188005	-0.416483206925768	0.677056453157471	0.92582635805075
A930033H14Rik	35.2258485429989	0.139470104680004	0.330248261289286	0.422318967359628	0.672792215495779	NA
AA414768	38.4216983779899	0.307765278001463	0.24485287647977	1.25693960563657	0.208775505627493	NA
AA415398	43.2750925538923	0.118633030247116	0.246613788918222	0.481047839082733	0.630482498754415	0.912944269438469
AA474408	42.5539756638144	-0.122602845857297	0.270494274933916	-0.453254864219398	0.650365230018984	0.91803966552519
Aaas	210.747092901968	-0.115903596254246	0.17536430035731	-0.660930394715967	0.508656952731585	0.878751036398117
Aacs	437.962616463444	-0.0966642691900362	0.145718622944721	-0.663362494351228	0.507098420527293	0.877971155439239
Aaed1	276.221368510444	0.0324936896452557	0.148453974947341	0.218880563196653	0.826743087683192	0.966491353753868
Aagab	1445.74779124386	0.0499455255705344	0.120288918728348	0.41521302293296	0.677985966172825	0.925932441185217
Aak1	2071.28872659237	0.167661893007335	0.127942467178027	1.31044755275854	0.190044475771674	0.688808316436252
Aamdc	70.3879174807716	0.279840400073203	0.212452277362398	1.31719181148553	0.187774337984318	0.68554337863637
Aamp	1026.47015147071	0.0279040262746242	0.100234940507494	0.278386220746426	0.780715895870065	0.957144475728685
Aanat	42.6676729157427	0.438634198589249	0.274717713874133	1.59667242568208	0.11033874528314	0.597963796984262
Aar2	454.577965521557	-0.0134637989438356	0.108710575157986	-0.123849946744087	0.901434084426534	0.980502671193999
Aars	2214.67978530495	-0.195881730635112	0.153774569953129	-1.27382395343272	0.202725814053661	0.701989212380382
Aars2	138.10978954105	0.0536092001212086	0.163672372360571	0.327539702321337	0.743259719362452	0.947602178509535
Aasdh	106.118926740732	0.186506753520441	0.170305477217535	1.0951306826275	0.273459388276718	0.758036443177802
Aasdhppt	159.812069555863	-0.281029491024982	0.146911442397323	-1.91291764915721	0.0557585957625973	0.499929376379778
Aatf	257.106099377009	-0.236830164163027	0.137712654751733	-1.71974147611912	0.0854794449407155	0.561338788231935
Aatk	306.36699597704	0.366558405695412	0.199071007604823	1.84134500601448	0.0655710163119996	0.519978942308265
AB124611	911.977526673854	0.137378801416598	0.182774717829327	0.751629125998051	0.452274122729571	0.86135580382557
Abca1	5185.20868263863	0.12210820582307	0.141093119074285	0.865444088444738	0.386795091264352	0.830708863336902
Abca2	1953.59721045422	0.194867442732564	0.193678254772022	1.00614001794854	0.314348220875388	0.788873755889249
Abca3	1205.14008186762	0.277244202690237	0.11172330963178	2.48152514997975	0.0130821478134969	0.336361600940083
Abca5	96.384775378663	-0.13359573139856	0.242796980863604	-0.550236378242322	0.582157255185449	0.896062442990182
Abca7	934.975194409336	0.291228192190663	0.134886341430672	2.15906361683289	0.0308452318113606	0.413978476635755
Abca8b	53.0017071036891	0.195418057334474	0.324527468694196	0.602161838937021	0.547066414779434	0.888636181222507
Abca9	59.5061841846539	0.319501325070324	0.337188784895756	0.94754434127784	0.343361472609083	0.805919077881303
Abcb10	270.197814205041	-0.0840951299465446	0.169933556340548	-0.494870652727455	0.620691427648289	0.90951011613642
Abcb1b	463.680654301238	-0.14259179960557	0.184961872003873	-0.770925369973465	0.440751168518279	0.856312767024402
Abcb4	1563.40699007541	-0.0351803059019812	0.196081588271151	-0.179416671458884	0.857610541850007	0.972328695426226
Abcb7	1688.94886224706	-0.290415728392393	0.0990523637104145	-2.93194142485525	0.00336850273823643	0.215885560931404
Abcb8	874.437577023844	-0.130242164828951	0.162064369690531	-0.80364465722882	0.421602224518256	0.845903674641025
Abcb9	72.8133194754739	0.324388499078952	0.251199823404992	1.29135639779477	0.196580122614332	0.695882341388236
Abcc1	6703.72071979788	0.168807313926366	0.103936577858205	1.62413769439918	0.104346424688902	0.590387932815675
Abcc10	162.435557005188	0.576027570059917	0.185034715960947	3.11307835974678	0.00185146852710971	0.180474965518559
Abcc3	1312.16242923705	0.361933372309407	0.149685151119765	2.41796443803447	0.015607602077587	0.345111499840795
Abcc4	392.282460781936	0.0793390445934827	0.133616306405065	0.593782650696556	0.552657494419625	0.889792078423772
Abcc5	2601.78995316012	0.170702173532404	0.0909323313527729	1.87724400103812	0.0604846593853308	0.511189792165046
Abcd1	1235.73006076488	0.198708479490581	0.119576926458582	1.66176272777348	0.0965603582616854	0.580979658109522
Abcd2	69.4213917274542	0.19257249887938	0.322390544663182	0.597326758080236	0.550289242872427	0.889457641252763
Abcd3	859.103431900128	-0.00846287192005958	0.149247002519362	-0.0567037982485558	0.954781148321316	0.993445164905308
Abcd4	89.8372304535961	-0.0178533759344329	0.178041501124763	-0.100276485098393	0.920124825554882	0.985279828768369
Abce1	1506.5525306812	-0.254283337367557	0.0932278775532613	-2.7275461379273	0.00638073336623981	0.272501620175231
Abcf1	1591.0351294534	0.0343547831597371	0.101873552240999	0.337229657786598	0.735943781702293	0.945947834578684
Abcf2	808.364685008163	-0.071113867117138	0.109041528219271	-0.652172326254779	0.514290010244668	0.879576510212934
Abcf3	647.662400667371	0.138977975191163	0.113277162318989	1.22688432819142	0.219866069657274	0.714046725574455
Abcg1	2762.1447929678	0.0523440701550268	0.113588171993574	0.460823246261837	0.644925422259152	0.91540466838469
Abcg2	54.8917406861761	0.0151841190818201	0.220048124318324	0.0690036287691984	0.944986731046496	0.991279447075315
Abcg3	289.087029266361	-0.220712905518605	0.240955152912675	-0.915991639318017	0.359671280058687	0.816232755607049
Abhd10	201.179699956832	-0.248912798795033	0.159287881091624	-1.56265999076136	0.11813258970357	0.610576837355566
Abhd11	146.436203567284	0.0216213786780557	0.173901276863	0.124331339413275	0.901052934543666	0.980502671193999
Abhd12	1477.09734877125	0.168116793954438	0.110233224430946	1.52510093778262	0.127233923361536	0.624421250179541
Abhd13	647.603122218289	0.0180889872064912	0.140779856428734	0.128491303126511	0.89776018027524	0.979652801545349
Abhd14a	40.582873739248	-0.116866564658459	0.292425937930009	-0.399645002374688	0.689418005389549	0.929449358318105
Abhd14b	55.3510570136941	0.0419742685402631	0.240651866561883	0.174419044156757	0.861536148639264	0.973107296533371
Abhd15	40.8914667266463	0.199254666965022	0.237962910070545	0.837334973361826	0.402404305973253	0.837818064061299
Abhd16a	538.536765703945	0.0918725512379971	0.11463832485435	0.801412192255277	0.422893059112528	0.845903674641025
Abhd17a	624.534036012431	-0.00156982989019717	0.104674164394812	-0.0149973004253089	0.98803433408958	0.998893265342896
Abhd17b	566.130771963227	-0.104028709573802	0.114590845501978	-0.907827402076421	0.363969418449705	0.816997890420706
Abhd17c	890.352460404072	0.0615698324346631	0.0929016073764296	0.662742380604753	0.507495561889828	0.877971155439239
Abhd18	90.9294720948146	0.175059101958618	0.192390259193015	0.909916659465543	0.362866463254955	0.816997890420706
Abhd2	1587.30691535227	0.0149921518612669	0.102519337254722	0.146237307640967	0.883734054884851	0.978065055992312
Abhd4	789.965155011751	0.231257132720175	0.103491724617219	2.23454709616171	0.0254470973455629	0.402165926449277
Abhd5	690.998445171235	-0.0802910450575168	0.142318545775144	-0.564164316183871	0.572642310309291	0.894189389398781
Abhd8	145.6294600783	-0.000104205031932829	0.160437627543433	-0.00064950494175451	0.999481770071245	0.999855680944743
Abi1	4061.23608732131	-0.0953364500442339	0.07772540727834	-1.22658025712014	0.219980393374786	0.714046725574455
Abi2	546.324694740286	-0.0760608883821036	0.12807139804853	-0.593894417809682	0.552582732855524	0.889792078423772
Abi3	87.9857071541534	0.228980120531629	0.192668487683174	1.18846690128261	0.23464951245493	0.727291589603417
Abl1	1692.80593511357	0.267323213177638	0.120678274185019	2.21517265624623	0.0267482159476687	0.403970473495378
Abl2	5605.61563522946	-0.00131883967011751	0.149572883003686	-0.00881737146221227	0.992964846602774	0.999799152536572
Ablim1	1156.76841624441	-0.0716179891974701	0.389278718408097	-0.183976122533342	0.854032186636427	0.97199233025551
Abr	7429.57183695919	0.170955209329696	0.128880727163043	1.32646062055055	0.184687170654226	0.683747474680719
Abracl	298.36047910523	-0.20641826503628	0.134899543213363	-1.53016281685847	0.125976432610276	0.621817708105929
Abt1	167.226401461668	-0.139177355014689	0.172071455972867	-0.808834645047897	0.418610265337551	0.845903674641025
Abtb1	355.898548029664	0.271982932183411	0.132767583294944	2.04856430638794	0.0405047379147115	0.455073108673011
Abtb2	259.847274338071	0.374918485559445	0.14914687769185	2.51375349830695	0.0119453894475777	0.324550779583873
AC122844.3	35.7062800326868	0.639065358642069	0.307525261350244	2.0780906122513	0.0377010141513282	NA
Acaa1a	1080.38885404934	0.0510276636615442	0.120018205223221	0.425166028492413	0.670715646939697	0.92377324694123
Acaa2	1469.40463121455	-0.102009635148741	0.161392944084486	-0.632057589180237	0.527349246789125	0.882017382914846
Acaca	519.981579205448	0.0827565015625373	0.130224456792799	0.635491240283781	0.525108078010957	0.882017382914846
Acacb	33.9051888786936	0.288440439335775	0.320219975468991	0.900757171420452	0.367717443701622	NA
Acad10	230.853923515757	-0.177399668487064	0.281562444144101	-0.630054441480387	0.528658965635098	0.882017382914846
Acad11	499.955102417254	-0.231879905496116	0.154426864327835	-1.50155160182398	0.133212950574958	0.63060813689023
Acad12	134.372234481459	0.324055835666577	0.196745934635857	1.64707767032823	0.0995420821961256	0.583651340627123
Acad8	319.196158254287	-0.00617439311503861	0.12283287659683	-0.0502666166103443	0.959909926210347	0.994504013733341
Acad9	302.696513215736	-0.204093525377451	0.175383299444901	-1.16369988490021	0.244545656091461	0.733407257905149
Acadl	1052.94842918918	-0.0966204312957224	0.104337096280438	-0.926041022226893	0.354424661953334	0.813206933776762
Acadm	1062.42795397671	-0.128922213289768	0.12223404358221	-1.05471609636361	0.291555187839069	0.773657827830231
Acads	714.206832866515	0.0850910997684381	0.176156024761404	0.483043937235132	0.629064539416557	0.912181672588409
Acadsb	709.402398175675	-0.0168814119110663	0.110191216025805	-0.153201067380116	0.87823971596194	0.976406212390727
Acadvl	512.280647712024	0.0129291308325575	0.137346873254279	0.0941348756343437	0.925002016625807	0.986762147302941
Acap2	8356.23213391471	-0.146802572135688	0.169952775680958	-0.863784492765635	0.387706288125611	0.831310172422733
Acap3	521.757830209305	0.173049521117326	0.117517530889633	1.47254217993949	0.140874525452961	0.637384892732345
Acat1	1137.16217654492	-0.257989497809412	0.134105692245264	-1.92377738401721	0.0543824934120178	0.496751863519183
Acat2	116.247855511428	-0.458859459855668	0.198092043708296	-2.31639520328928	0.0205367004202139	0.386383349334596
Acbd3	1362.51509682149	-0.0460705216041294	0.127348315242486	-0.361767813860795	0.717525546133047	0.939445726645748
Acbd4	71.0185843277386	0.0553742829624762	0.225294824412399	0.245785863509738	0.805848000729544	0.962035823693129
Acbd5	1109.85058390305	-0.0358772426997184	0.149524351753713	-0.239942472774021	0.810374853929474	0.962684050658319
Acbd6	324.217080711894	-0.063244652765622	0.119148934373601	-0.530803343715299	0.595555062737064	0.900739052659247
Accs	153.436586680297	-0.113612070780706	0.207173479726776	-0.548390995462063	0.58342345799745	0.896980598430533
Acd	196.153186954268	0.12869564862726	0.155748665452955	0.826303379569785	0.408632016869884	0.839285270483232
Acer2	62.4441116895273	0.433658671170211	0.355996608102011	1.21815394107897	0.223165478824886	0.718035652624977
Acer3	1269.15265077608	-0.148597952318431	0.102596373589034	-1.44837431499932	0.147512394117111	0.646621452466758
Acin1	1668.62394160071	0.0871166273066022	0.094753983950159	0.919398041906353	0.357887413137189	0.814935394261638
Ackr4	35.2979654566699	-0.208327659098603	0.307240416772931	-0.678060722891706	0.49773319288592	NA
Acly	4163.5008313928	-0.0835804639185133	0.131384298189644	-0.636152607809121	0.524676959260002	0.882017382914846
Aco1	1628.721961733	-0.121228145612174	0.150964608686758	-0.803023613724687	0.421961086157964	0.845903674641025
Aco2	7841.01936006846	-0.0939081360904092	0.184282548200235	-0.50958778792429	0.610340281229541	0.906164127159078
Acod1	2469.37955792157	0.507744398777147	0.126919514950401	4.00052268538504	6.32027276142387e-05	0.0681038118555974
Acot1	41.7964197069269	-0.272951771256283	0.299623899309424	-0.910981306515883	0.362305223278797	0.816997890420706
Acot10	76.2789389222642	0.0261914026846987	0.200179048326016	0.130839880115939	0.895901974385341	0.979652801545349
Acot11	206.247255600773	-0.0430167365835903	0.176909578617445	-0.243156627921267	0.807884064530691	0.962684050658319
Acot13	256.07649699887	0.0330074622467749	0.168493855700492	0.195897126987513	0.844690686034227	0.970666766794081
Acot2	206.564633591479	-0.311134672797598	0.137155008828319	-2.2684893206274	0.023299399185904	0.394787844028368
Acot7	865.484625974086	-0.21567872998108	0.140045447056787	-1.54006241912045	0.123545139177555	0.621720544082125
Acot8	212.686453192869	0.12071666095634	0.171830116579812	0.702534941831743	0.482345618758676	0.870252053235847
Acot9	447.921607322499	-0.0687679054415709	0.136022951031456	-0.505561046280108	0.613164833250196	0.90749915378462
Acox1	1653.81030362471	0.103936718347043	0.109347273100968	0.950519527369206	0.341848336495767	0.804707085186835
Acox3	1411.51816728692	0.379846971280268	0.109342788988464	3.47390966330977	0.000512933694142118	0.108567912083331
Acoxl	41.4200973363084	0.258168365595168	0.273575353861917	0.943682835280091	0.345331747979042	0.805919077881303
Acp1	259.028022172952	-0.373242411684966	0.14114923680894	-2.64431051929943	0.00818575230525905	0.283649450664517
Acp2	2234.45976435944	-0.00394480359467336	0.0916980720923625	-0.0430194823583638	0.965686003552993	0.995246688432371
Acp5	67407.3951328612	-0.0692280699747432	0.267921830616472	-0.258389060030882	0.796106658838258	0.959062651939419
Acp6	219.33553243236	0.0568042846125645	0.138042613974429	0.411498181446254	0.680707274459662	0.926177746349514
Acpp	329.754942029435	0.331148208093936	0.132261432311697	2.50373976983349	0.0122888383023356	0.330911958691065
Acsf3	247.738371967865	-0.0978987637407528	0.130804034346729	-0.748438411931911	0.454195760583708	0.86135580382557
Acsl1	2988.3784025735	-0.0882459140515453	0.121192670339666	-0.728145636235419	0.466524440280759	0.866007262963103
Acsl3	569.130417683739	-0.0897665220051692	0.151289077928443	-0.593344365861144	0.552950713144313	0.890022379535516
Acsl4	2307.80707111107	-0.0253940168758867	0.141304839367866	-0.179710878901869	0.857379552368219	0.972328695426226
Acsl5	1568.87531395533	-0.146096520186261	0.100528503905685	-1.45328453632739	0.146144768973336	0.644294941445925
Acss1	63.4505328046677	0.647303613815967	0.220701686302157	2.93293460807436	0.00335774604962825	0.215885560931404
Acss2	171.776364169447	0.193406864732887	0.161210313068775	1.19971769207084	0.2302489995416	0.72212822580531
Actb	106989.950333414	-0.200999778696849	0.110341829294936	-1.82160999125355	0.0685141838488181	0.529513314391284
Actg1	2244.0550518475	-0.12271761208112	0.171433974995933	-0.715830173593249	0.474096218571402	0.867506393064361
Actl6a	459.579814051893	-0.29358864665773	0.119466744807247	-2.45749264476419	0.013991067571607	0.342690730796263
Actn1	6838.32298928083	-0.0587940723604138	0.143323388307655	-0.410219665154773	0.681644816500705	0.926177746349514
Actn4	5178.79746242324	-0.111889358708683	0.107553077069941	-1.04031759719828	0.298192371274591	0.778347099034954
Actr10	704.224488315869	-0.100606044632446	0.119771298363515	-0.839984587351628	0.400917028257999	0.837337859186443
Actr1a	2251.22818729331	-0.0399422681763619	0.0963886442265431	-0.414387695738153	0.678590198554782	0.926177746349514
Actr1b	1448.1691915583	0.0582816585452158	0.121358761313293	0.480242694590127	0.631054831442913	0.912944269438469
Actr2	12489.84201145	-0.253967793658787	0.101666223680391	-2.49805475668288	0.0124876903127772	0.334647547428289
Actr3	6731.88387834851	-0.177160146482309	0.0963061441765739	-1.83955185826454	0.0658340577623023	0.519978942308265
Actr5	206.619382952078	0.0241017881657795	0.183094688451236	0.131635649125881	0.895272486945173	0.979652801545349
Actr6	85.6766813083069	-0.279600573863797	0.2026075926885	-1.38001034489201	0.167583459695962	0.668309685603534
Actr8	420.742022019286	-0.119705481749427	0.104385318434226	-1.14676549868317	0.251478551965267	0.73740459410284
Acvr1	424.564946878055	0.112161652973316	0.128485492014286	0.872951889080557	0.382689301701726	0.826622177864584
Acvr1b	399.13528480857	0.123652662563983	0.135413274704357	0.913150227213319	0.361163537067569	0.816804313081835
Acvr2a	423.113404687124	-0.198863994355699	0.145952254142592	-1.3625277356896	0.173031397188301	0.671732458386179
Acvr2b	80.8538009555376	0.23204397993851	0.255405162145659	0.908532850272517	0.363596765926273	0.816997890420706
Acvrl1	140.303670160106	0.335991138486751	0.248145390412585	1.35400918763031	0.175733446543932	0.673399433287697
Acy1	167.486772018638	-0.103612103381037	0.196068419231633	-0.528448710848382	0.597187936385198	0.901551751113336
Acyp1	36.6263427074062	0.297950895634488	0.290275101738107	1.02644317011835	0.304682738097082	NA
Ada	61.3157942176452	-0.251497389822211	0.222579357656272	-1.12992234531738	0.258508947355001	0.741640414397366
Adal	91.4521733436511	-0.119166555815746	0.214070746003748	-0.556669036009523	0.577753576337988	0.894476637974683
Adam10	3108.22313880493	-0.153211996634353	0.0944796599371063	-1.62164000946176	0.104880450683057	0.590477792508547
Adam15	1239.45457471276	0.168387982855851	0.114298575794212	1.47322905544356	0.140689282965848	0.637384892732345
Adam17	3675.71563253059	0.00325612286940209	0.10506750766023	0.0309907690961114	0.975276901332555	0.997011087024843
Adam19	33.2159360003735	0.538935055751178	0.380364435526146	1.4168912900747	0.156514713419848	NA
Adam22	65.6464906611139	0.192023737849972	0.293798261201112	0.653590450348267	0.513375698343318	0.879576510212934
Adam33	106.7724465643	0.701931907429903	0.354887709203723	1.97789861194364	0.047940145586125	0.474658745512801
Adam4	41.5053719176667	0.147116371596518	0.273716020690156	0.537478117742519	0.590937396146026	0.898770948434017
Adam8	7158.31433883465	0.0326138083107169	0.136650418457103	0.238665996628141	0.811364585607758	0.962684050658319
Adam9	2680.36840935666	-0.124690261832414	0.103845219707868	-1.20073184093775	0.22985523862829	0.722097573141033
Adamts1	30.764694494231	-0.299137053021636	0.427733557143721	-0.69935371687736	0.484331004622	NA
Adamts10	275.502204589273	0.416061071263463	0.149549772576237	2.78209096607863	0.00540098993152485	0.256106142589273
Adamts14	160.375720587775	0.0415093400617755	0.242175952445033	0.171401576592114	0.863908015183186	0.973344881710843
Adamts4	49.5401539578298	0.118357160829429	0.391951172911478	0.301969145672539	0.7626755838256	0.952704812861294
Adamts7	107.981714706724	-0.130971843221691	0.195812415614207	-0.668863834863942	0.503582341823835	0.876386772629453
Adamtsl4	231.41839779584	-0.0992833296228943	0.188943741069309	-0.525465035576249	0.599259953241659	0.902430215445736
Adamtsl5	115.892334277802	0.130777288146663	0.224298119516114	0.583051201805852	0.559858832476537	0.892330774459806
Adap1	874.94496073132	0.00414247703406598	0.145435518001276	0.0284832556104323	0.977276722698668	0.997201371986595
Adap2	648.273169119013	0.272787613991484	0.200550953307816	1.36019106113545	0.173769470532865	0.671732458386179
Adap2os	64.7862415435306	0.452292032269541	0.220260822103646	2.05343840974457	0.0400300773368193	0.453610427029942
Adar	1071.10876420818	0.0549420016994544	0.13854838089789	0.396554628378853	0.691695916170687	0.930394891105894
Adat1	68.3285541241351	0.0199043717345082	0.244348554644591	0.0814589296976177	0.93507698564436	0.989720437731918
Adat2	53.8877129205031	0.0663845833047058	0.275861227509599	0.240644848513174	0.809830387324956	0.962684050658319
Adat3	46.5372819636595	0.530743938985371	0.245484277119835	2.16202823745931	0.0306159997195731	0.413787280132383
Adck1	234.30687021652	0.23011059035605	0.141428050127033	1.62705057553549	0.103726356760607	0.589108053034729
Adck2	141.342097895315	0.212835345738401	0.145934768699847	1.4584279513003	0.144722620936655	0.643429535912159
Adck5	152.398642634131	0.0439149020258748	0.181460563424476	0.242007966894428	0.80877399001046	0.962684050658319
Adcy3	1717.37661191833	0.0517243168015716	0.229242552997776	0.225631394019911	0.821488121524505	0.964794379221003
Adcy7	3760.19615933606	0.112139561520665	0.100003366585874	1.12135786373121	0.262135564305082	0.745184527710913
Adcy9	710.136638100959	0.221581157655535	0.146725471470557	1.51017512797701	0.130998743398018	0.629191395564054
Add1	2567.65990108579	0.0968685737324233	0.117590576355318	0.823778373529866	0.410065497929133	0.840729359137326
Add3	405.015155511776	-0.179772457303453	0.154861782984018	-1.16085746812049	0.245699867760851	0.734271516522292
Adgb	90.3303956258405	0.488651417714665	0.242280045887394	2.01688676393011	0.0437073316601736	0.464764285026835
Adgra3	432.75558732231	-0.0192814053162821	0.276548489307959	-0.0697216078255654	0.944415243073271	0.991279447075315
Adgrb1	162.590553492404	0.0105366759359264	0.344498468649048	0.0305855523168101	0.975600064341165	0.997011087024843
Adgre1	10654.7713710134	0.074479278482637	0.183074727217417	0.406824467880739	0.684136914621187	0.927075784078718
Adgre4	97.106105793855	0.195205360581368	0.302316538767425	0.645698582608944	0.518474578700403	0.882017382914846
Adgre5	2175.06719902341	0.103160581418118	0.123019360223282	0.838571922589096	0.401709572024742	0.837337859186443
Adgrf1	33.6511858124263	0.187635090968974	0.277631546720025	0.675842112273332	0.499140894168185	NA
Adgrg6	149.225204427956	-0.046701790902938	0.205147799146294	-0.227649485382167	0.819918746076348	0.964228820915787
Adgrl2	1574.08681955689	-0.17632846241433	0.0963929423506425	-1.82926735209421	0.067359566995908	0.525617477026003
Adh5	987.374428914311	-0.106009371067365	0.0995407806688127	-1.06498432456617	0.286883023398108	0.769822748446368
Adhfe1	60.9587715747121	-0.0836381442911388	0.246554762047503	-0.339227454365795	0.734438388565067	0.945632833605951
Adi1	341.965282343406	0.0123611825593547	0.145176284934081	0.0851460179254993	0.932145306099832	0.989151196119206
Adipor1	3086.260163092	0.0933257076313393	0.135823047267411	0.687112456309408	0.492011865292829	0.873509812852559
Adipor2	1414.7691033324	0.03112872893032	0.0834885720778929	0.372850177642008	0.70925995486598	0.937433053380008
Adk	291.188775088682	-0.213354273610702	0.134712880966637	-1.58377040175944	0.113245977123521	0.603282951391055
Adnp	125.640692850287	0.176988864713541	0.171412910704476	1.03252937008158	0.301824196233956	0.781288970945857
Adnp2	359.270508658733	-0.0661162143781025	0.152735272691743	-0.432881109994421	0.665101143991595	0.921548279191846
Ado	873.230204585383	-0.0268422044009555	0.103506789377624	-0.259327958700631	0.795382209154604	0.959062651939419
Adora2b	75.051528021643	0.119787714012626	0.197018154163852	0.608003432582175	0.543185197283235	0.887581776415558
Adpgk	351.913994338046	-0.0980037575203455	0.116447854774527	-0.84161067380851	0.400005912690117	0.837337859186443
Adprh	754.191398547786	-0.0223367680295047	0.0941737500786483	-0.237186774561386	0.812511895981754	0.962696739938401
Adprhl2	226.524461066664	0.127929160935354	0.149231447020357	0.857253370450149	0.391304872610483	0.833129070244313
Adprm	169.198317440757	-0.0955647471211699	0.153567249665202	-0.62229900795589	0.533745273394389	0.884397237140872
Adra1a	38.0379289535475	-0.00436933587087107	0.265859907976084	-0.0164347302462172	0.98688757275679	NA
Adrb2	657.789663508297	0.384785020892239	0.230922239327786	1.66629694053005	0.0956542858088029	0.579771764940604
Adrbk1	2860.03652078586	0.162234824006703	0.111215922366945	1.45873738718298	0.144637401643233	0.643429535912159
Adrbk2	3849.62432056125	-0.0214223319609784	0.102724418198739	-0.208541769684527	0.834805971985024	0.968735233973196
Adrm1	294.502230674349	0.186412043223151	0.13356741043535	1.39564016862765	0.162822879890259	0.66380341845697
Adsl	490.852123587003	-0.206189936219745	0.114789130687072	-1.79624965347844	0.0724548210342841	0.53703120248297
Adss	2179.7025459848	-0.240483566289091	0.100210132030885	-2.39979292927159	0.0164043486574828	0.354172576752538
Adssl1	1131.08605400702	-0.190171089636355	0.171898990229614	-1.10629555986532	0.268598612993282	0.751404144396832
Aebp2	1994.32154592466	-0.0663007423779956	0.112213706850976	-0.590843527395862	0.554625267241265	0.890276815948786
Aen	325.279498212661	-0.0919649202786643	0.126891191199823	-0.724754172524408	0.46860285467095	0.866404124284443
Aes	3579.98359250344	0.0207866058229137	0.100597123495931	0.206632208760466	0.836297104123417	0.969091329964221
Afap1	145.97868040017	0.142044060739377	0.249804472955272	0.568620966065768	0.569613393370947	0.894189389398781
Aff1	3131.21416641622	0.261221207350217	0.121147245362636	2.15622902995682	0.0310657858031268	0.415913789053699
Aff2	70.4895387731867	-0.196260463574874	0.260587250616054	-0.7531468370417	0.451361681794337	0.861024152261157
Aff4	3648.04510141161	0.143367809762551	0.124930696780124	1.14757872530621	0.251142516552813	0.73701219329054
Afg3l1	965.747330651723	-0.0942926229341789	0.102243064642674	-0.922239794588697	0.35640351001723	0.814430461583618
Afg3l2	1483.97645471972	-0.0569807160143958	0.14611311880332	-0.38997672817522	0.696553755481888	0.931911531425944
Afmid	35.7795704851807	0.340139639041893	0.358357298790748	0.949163419273643	0.342537503349353	NA
Aftph	2004.77575877476	0.0343326886996728	0.0763801875840103	0.44949730794927	0.65307294963708	0.918837000310646
Aga	313.12192929511	-0.101168896436253	0.15604811370781	-0.64831861169232	0.516778898706189	0.882017382914846
Agap1	4671.02593565815	0.050778853891107	0.189776692150837	0.267571603844519	0.789029091023668	0.958765303946085
Agap2	27.6419721029874	0.156749042914225	0.310579586559001	0.504698472462055	0.61377063411053	NA
Agap3	2203.15708205826	0.0535481429657906	0.110719482211447	0.483637946061986	0.628642839660438	0.912181672588409
Agbl3	40.1345621243727	-0.04935463891118	0.315249453617633	-0.15655741300996	0.875593668053149	0.976235137411937
Agbl5	196.197693185907	0.437820641452883	0.171254484890326	2.55654993055084	0.0105715898090078	0.302041901756186
Agfg1	2262.88315489277	0.0873844148016522	0.129405129532542	0.675277827991179	0.499499267824352	0.876071911528097
Agfg2	789.103980341325	-0.0856866778153852	0.138782754162359	-0.617415890991343	0.536960443109871	0.885570075439168
Aggf1	857.5950592703	-0.0261849294195272	0.0916468755335126	-0.285715462388591	0.775096060894777	0.955999493206543
Agk	218.996682986676	-0.147140701264311	0.141683169735863	-1.03851926476957	0.299028371102172	0.778405327970325
Agl	1887.46583564336	-0.0347229226798136	0.126945837909697	-0.273525491276947	0.784449299966641	0.957971957200645
Agmo	38.2691346177281	0.845357361219236	0.393793393041166	2.14670275367181	0.0318169534144402	NA
Ago1	1399.19641323121	0.15412352353891	0.104049218527016	1.48125594522261	0.138538383208025	0.634945077189728
Ago2	8721.87956893535	-0.0181488703385306	0.120258770654495	-0.150915149387919	0.880042649877935	0.976843839195062
Ago3	1837.17531899951	0.138297136945358	0.0854018481085521	1.61936936973041	0.10536781316529	0.590477792508547
Ago4	643.372975745347	0.232745226618725	0.107737109396428	2.16030695386786	0.0307489150055594	0.413978476635755
Agpat1	939.613366784778	0.00311437807900484	0.116397048463666	0.026756503881428	0.978653945659737	0.997201371986595
Agpat2	165.781763389933	0.136366943341575	0.169164379106606	0.806120910689111	0.420173135593253	0.845903674641025
Agpat3	356.941662335951	0.172846840181663	0.134861069887611	1.2816659420373	0.199959857174852	0.698327692131268
Agpat4	955.671065877742	-0.236271709633996	0.156916111458633	-1.50571988712761	0.132139096531153	0.629423496439573
Agpat5	623.35349460227	-0.233709829586056	0.111001211025156	-2.10547098925876	0.0352503300462401	0.433875557671946
Agps	1921.04601878945	-0.155272390993532	0.0901499726408506	-1.72237868126841	0.0850009429847971	0.561338788231935
Agrn	1353.17589967098	-0.00798251110295718	0.116957524199488	-0.0682513686707478	0.945585535983203	0.991402582212539
Agtpbp1	652.658883836542	-0.1176571186755	0.134151195174345	-0.877048605661631	0.380460238103901	0.825673227217677
Agtrap	515.585402829891	0.151160258984967	0.11889888092422	1.27133458120022	0.203609644864365	0.702791240703937
Ahctf1	1728.28227312375	-0.0299655644734033	0.0916437987408245	-0.326978637781571	0.743684042506228	0.947687425329262
Ahcy	117.363923633132	-0.394135051111108	0.194332659510639	-2.02814623184597	0.0425453256302435	0.460971409535243
Ahcyl1	2480.76999870062	-0.0963699190597843	0.07790077715358	-1.2370854641128	0.216055355634264	0.711406030596784
Ahcyl2	1054.79576589942	0.0635541188196913	0.100325355003908	0.633480128898781	0.526420153205538	0.882017382914846
Ahdc1	113.53635535853	0.373911848460817	0.208271820238354	1.79530696007217	0.0726048067363601	0.53703120248297
Ahi1	49.9135540768259	-0.0773066158826567	0.255324596273797	-0.30277778565351	0.762059213742801	0.952704812861294
Ahnak	53291.9919336122	0.0556416929583582	0.1067916299917	0.521030468049629	0.602345546813691	0.904357236039896
Ahnak2	853.863283752852	0.118745791176331	0.129821404415963	0.914685769350141	0.36035661720646	0.816520796893359
Ahr	767.616337726791	0.108645946173417	0.158299693503009	0.686330742461939	0.492504567084509	0.873509812852559
Ahrr	641.271562878649	-0.0830457644038381	0.19741671977203	-0.42066226457281	0.674001719954827	0.925797526821551
Ahsa1	1178.96729038218	-0.127436169968029	0.140477430176022	-0.907164729653358	0.364319692158704	0.816997890420706
Ahsa2	114.811518494329	0.260199385065699	0.182691305301542	1.42425708019451	0.15437206688066	0.654318694416015
AI314180	3195.41468528035	-0.0301905506545456	0.0745760969281482	-0.404828784263586	0.685603369059167	0.927360120216627
AI413582	311.023401724075	0.064037686803376	0.127968729397137	0.500416680739576	0.616781710340161	0.907696371491129
AI467606	195.23751593252	-0.285076380711163	0.168964913417738	-1.68719277242109	0.0915662907106766	0.570029014597505
AI480526	30.8390721805576	0.63432304492229	0.369408079536026	1.71713365262339	0.0859547546505135	NA
AI504432	77.8725331317467	0.0182129001784801	0.261861583027719	0.0695516309337828	0.944550536576148	0.991279447075315
AI506816	1069.4114786791	-0.412138315880284	0.173588574975883	-2.37422489318519	0.0175858356528667	0.364901152717486
AI597479	185.529026579255	-0.0192282804498413	0.144800703880237	-0.132791346551359	0.894358398201499	0.979652801545349
AI606181	257.672034883459	-0.0383072221196084	0.163816943287397	-0.233841636590685	0.81510792421909	0.963422897698916
AI607873	3482.06392899778	0.0271455264393294	0.150801200711425	0.180008688997613	0.857145746793293	0.972328695426226
AI661453	56.933744385238	0.170067770466498	0.210440967770232	0.808149536036083	0.41900450416129	0.845903674641025
AI662270	758.274075318221	-0.197762825817351	0.105227607637637	-1.87938156399383	0.060192411803059	0.510301675739295
AI837181	330.589577400018	0.103840642723757	0.115010358449284	0.902880785034223	0.366589169680687	0.817527848137409
AI846148	110.469554003236	0.169266192912083	0.179200857406103	0.944561289282753	0.344882897888948	0.805919077881303
AI987944	209.365615979669	-0.0256040565676327	0.186989286957368	-0.136927933061054	0.891087759395662	0.979587075796088
Aida	514.646025615333	-0.13346997918649	0.131327911699917	-1.01631083186237	0.309481392085976	0.785608260028903
Aif1	354.404803202636	0.255644312659049	0.223066355881834	1.14604603481519	0.25177610481934	0.737582699671327
Aifm1	518.201801332645	-0.0722730223537923	0.149569395702852	-0.483207289928325	0.628948559726227	0.912181672588409
Aifm2	598.155655540626	0.0582912876167075	0.123450182244115	0.472184702825632	0.63679495753157	0.91467894227117
Aig1	231.387507424096	-0.194171758659116	0.234799966885078	-0.826966720800915	0.408255924257099	0.839285270483232
Aim1	1876.19499603547	-0.119511074592876	0.133207445488733	-0.897180140001891	0.369622800843062	0.818488801588431
Aim2	737.228992564062	0.118825492048661	0.130842922458567	0.908153760370865	0.363796990228773	0.816997890420706
Aimp1	330.249842455505	-0.20234801958376	0.134832137287032	-1.50074028087977	0.133422750183019	0.630937483661134
Aimp2	104.085022538495	-0.156959730138538	0.175094089298628	-0.896430774832373	0.370022737043708	0.818488801588431
Aip	584.314599851252	-0.0478951193529924	0.0967047054654177	-0.495271860066003	0.620408231654568	0.909323453666575
Airn	296.412486027422	0.00228005764902311	0.140947333800552	0.0161766639179533	0.987093452524165	0.998893265342896
Ajuba	30.8417189681754	0.535518926808888	0.307578479575777	1.74108060989018	0.0816694496648867	NA
AK010878	64.5564787721302	-0.0337297529403546	0.265381094890346	-0.127099305827688	0.898861800876446	0.979732965987102
Ak1	154.025312281725	-0.28468546677267	0.304563306456614	-0.934733307451875	0.349925757273964	0.809808854780681
AK157302	105.167532294745	0.00655816069164187	0.221800745786102	0.029567802706878	0.976411743798371	0.997019785343297
Ak2	2203.8386509378	-0.278039586488491	0.101229132168316	-2.74663607731209	0.00602099029293782	0.266696559568955
Ak3	1114.02943789786	-0.0161446425549272	0.122335504954472	-0.131970212253063	0.895007852818144	0.979652801545349
Ak6	116.611444664701	-0.0953160441853498	0.180642524727864	-0.527650088642984	0.597742221135023	0.901565686146123
Ak8	33.2312451861481	0.830097574298719	0.333473310490962	2.48924740956508	0.0128013846936943	NA
Akap1	390.371824353484	-0.0911901877208641	0.127717246546395	-0.714000576952137	0.475226822692302	0.867506393064361
Akap10	1144.0017185	-0.0214594417821564	0.0832413447327155	-0.257797874975011	0.796562904595872	0.959062651939419
Akap11	970.240953091776	-0.070614796196417	0.105483790009002	-0.669437419629979	0.503216488283889	0.876161312177623
Akap13	3214.4140886887	0.205746221629897	0.112352226595513	1.83126074012415	0.0670616345423661	0.524608173014378
Akap17b	78.4465287454759	-0.0618031972275184	0.251272092100991	-0.245961247469849	0.805712231124069	0.962033552484495
Akap6	6953.29172351775	-0.333854534790397	0.252389483218566	-1.32277514313575	0.185910165792535	0.684555036757474
Akap7	177.934303114441	0.0747612514432141	0.168739718500294	0.443056632473188	0.657724772323178	0.919642961258458
Akap8	967.849853547492	0.00270910863808989	0.122685697993436	0.0220816988646454	0.982382785107748	0.997201371986595
Akap8l	301.436694412733	0.377150883069968	0.140801961745106	2.67859111048982	0.00739326151970016	0.279418107063236
Akap9	1663.39153813859	-0.0105134957145565	0.0820451447948988	-0.128142813823277	0.89803595478678	0.979652801545349
Akip1	417.994995052476	-0.265674622222741	0.149652021520346	-1.77528254896724	0.0758512453818521	0.54095355686588
Akirin1	1191.79655448805	-0.0243933852506345	0.143021933646982	-0.170556953249172	0.864572148192049	0.973344881710843
Akirin2	739.496842049913	-0.0571280959029854	0.0919205655543862	-0.621494173348887	0.534274527011944	0.884397237140872
Akna	791.425932252063	0.309963986076149	0.132286456881842	2.34312713018693	0.0191228658828124	0.379148953297034
Akr1a1	14488.2246584702	0.102333509624098	0.119743823949909	0.854603655107136	0.392770603437536	0.834619928745986
Akr1b10	497.811652277881	0.0207585767723631	0.129017848892383	0.160896937521245	0.872174574384133	0.97539609936645
Akr1b3	202.331985360737	0.196651946616306	0.145106831401079	1.35522183702541	0.175346889312557	0.673399433287697
Akr1b8	1024.49424409716	-0.137620971854516	0.117293097238408	-1.17330836250994	0.240672169991704	0.730480550978789
Akr1c12	96.2683788302531	-0.035271099846026	0.188405399092005	-0.187208540816826	0.851497128622683	0.971819914777289
Akr1c13	378.110458207896	-0.12281437913539	0.142977347374445	-0.858977882795308	0.390352718415305	0.833129070244313
Akr1c18	645.152705624224	-0.25143563033105	0.294195138691723	-0.854655965592013	0.392741634926387	0.834619928745986
Akr1e1	256.230977497644	-0.178446251282618	0.139541873845754	-1.27880073819181	0.200967233911157	0.699578450381481
Akr7a5	172.002888025201	0.0872751759282101	0.138074476525329	0.632087682854258	0.527329583257709	0.882017382914846
Akt1	3475.11630521616	-0.0133219858677603	0.0931588773311776	-0.143002859731778	0.886287922668409	0.97813905548416
Akt1s1	434.143331246899	0.0455477147520326	0.118329647772977	0.384922254137177	0.700295017482253	0.933679368705562
Akt2	825.207609763788	0.0675770136034338	0.110465380002484	0.611748346874959	0.54070426921595	0.886931594660483
Akt2-ps	264.6014293468	0.131098330537394	0.145741920435062	0.899523830522099	0.368373708339063	0.818022392212314
Akt3	346.087993850415	0.299906369373155	0.224697753601962	1.33471013646367	0.181971234699364	0.679554204439684
Aktip	243.735961942489	0.0759617975682749	0.171979228521135	0.441691698593354	0.658712317654164	0.920361323740975
Alad	86.535433781198	-0.262434241333802	0.191933853455446	-1.36731606545232	0.171526258218665	0.67132197436774
Alas1	2421.55802759497	0.248348117048491	0.137235253193501	1.80965248556304	0.0703496951930763	0.532929683700447
Alas2	27.4745168668526	-0.108128259762368	0.365593154472565	-0.29576117178223	0.767412477464863	NA
Alcam	3713.37421604545	-0.0491066596975855	0.126617758131311	-0.387833905941209	0.698138952297128	0.932641630048361
Aldh16a1	893.778869745217	0.0298167616009023	0.116216408864354	0.256562407084047	0.797516598544952	0.959399598351093
Aldh18a1	358.755663348662	-0.404763165574971	0.273229434657086	-1.48140395665264	0.138498961014807	0.634945077189728
Aldh1b1	165.075621374079	-0.0459886649975644	0.25663040664098	-0.179201933237403	0.857779145795082	0.972328695426226
Aldh1l1	457.430970930864	0.156230980032712	0.143354499452909	1.08982264685757	0.275791275946634	0.759775520180688
Aldh1l2	37.4088394224067	-0.202657578936268	0.430640810974475	-0.470595386623215	0.637929702741079	NA
Aldh2	5947.29243948342	0.218749931823127	0.0919192647277745	2.37980506557543	0.0173217985792233	0.364154138286763
Aldh3a2	782.28489913941	0.0750966825328536	0.0900679056087485	0.833778492186448	0.404405817350096	0.838745823662387
Aldh3b1	1205.48866395071	-0.048385772296769	0.111146007072815	-0.435335227698015	0.663319118201173	0.921548279191846
Aldh4a1	401.794764957304	0.0265769206771001	0.206588654770427	0.128646564384834	0.897637319365971	0.979652801545349
Aldh6a1	208.893542850503	0.228134525212316	0.163732899116237	1.39333345005001	0.163518979933657	0.664154567883581
Aldh7a1	336.222274147802	0.135487229576607	0.146444047313175	0.925180859600685	0.35487183797768	0.813464390693725
Aldh9a1	1687.00093447951	-0.00767591317906953	0.090732220066095	-0.0845996402763861	0.932579685062143	0.989151196119206
Aldoa	15474.1331326876	-0.111683043461119	0.111195302283866	-1.00438634697002	0.315192428265699	0.788873755889249
Aldoart1	573.527386685351	-0.0586093357173474	0.121633706598951	-0.481851103252104	0.629911723536673	0.912644378325411
Aldoc	541.266362345572	-0.0317026081241941	0.150221447997607	-0.211039159499376	0.832856714561128	0.968290927365154
Alg1	301.0154269397	0.0861948610555937	0.133863313586218	0.643902042661434	0.519638957133508	0.882017382914846
Alg10b	939.389421270784	-0.165230205240051	0.102244810169372	-1.61602535098203	0.106088832249959	0.590859927892198
Alg11	302.270930699977	-0.168444230735011	0.123021946977455	-1.36922097945564	0.170930210011453	0.670674634709978
Alg12	134.782998509549	0.0722720449359096	0.147772958651649	0.489074899733714	0.624788670970332	0.91156602737555
Alg13	247.944134047318	-0.0277276717922352	0.178097676133248	-0.155688004438026	0.876278952939744	0.976297159368851
Alg14	74.5840732455922	-0.263547661009113	0.233433705907403	-1.12900431402848	0.258896013820713	0.742362931630459
Alg2	492.410154304143	-0.136588820428973	0.177475860559298	-0.769619147068942	0.441525843772611	0.856782048442186
Alg3	154.942492480148	-0.153757921338562	0.170989977560179	-0.899221834709274	0.368534512310281	0.818022392212314
Alg5	306.578298712347	-0.156462616278344	0.136313053896533	-1.14781828890068	0.25104358565265	0.73701219329054
Alg6	177.538821188427	-0.128223346890069	0.179144672526181	-0.715753056353546	0.474143843516785	0.867506393064361
Alg8	238.844375866519	-0.309721768107788	0.164717522450854	-1.88032070601474	0.0600643829938762	0.510301675739295
Alg9	443.917325928276	-0.100820375736205	0.119220948017579	-0.845659906355879	0.397742495804619	0.836806187098594
Alkbh1	331.365338047352	0.0446785337162085	0.14470379257085	0.30875855374926	0.757505198961964	0.951667079281622
Alkbh3	303.387736467002	-0.0428484061037536	0.119576725678092	-0.358333997362531	0.720093378784307	0.940668827841127
Alkbh4	106.088399529898	0.0275888482436091	0.216443791627151	0.127464262366712	0.898572956922385	0.979652801545349
Alkbh5	2740.84232335559	0.138820896735409	0.103987192471637	1.33498071671926	0.181882657786982	0.679437485896344
Alkbh6	109.144785672816	0.0266974195632282	0.174366433845736	0.153111002928739	0.878310739106378	0.976406212390727
Alkbh7	83.4157720047068	0.0369159182518779	0.217859990807004	0.16944790144869	0.865444348301044	0.973347742709201
Alkbh8	299.577428267645	-0.187972229575602	0.123304647143848	-1.52445373252082	0.127395406253575	0.624421250179541
Alms1	222.831056616672	-0.0650836021619379	0.242672964143506	-0.268194697302376	0.788549456472925	0.958765303946085
Alox5	528.967349083196	0.283933756577969	0.207996214161165	1.36509098361744	0.172224455544464	0.671506441177159
Alox5ap	1035.68837775874	0.0850906685477008	0.182867329406022	0.465313672070823	0.641706845309937	0.914847478476245
Alpk1	438.076460768886	0.329549487037378	0.158742476196729	2.07600067060167	0.0378938889714278	0.445369029741719
Als2	375.136624902916	0.0461946436589981	0.16805501867415	0.274878096610534	0.783409895548429	0.957590748884761
Als2cl	494.269153181785	0.260762613074413	0.205226047387782	1.27061168108789	0.203866829271763	0.702890960681574
Alyref	732.19829667278	-0.349266310113973	0.173650890861139	-2.01131309135215	0.0442923965769613	0.465423560839292
Amacr	262.837444611983	-0.111310238659971	0.306058752030396	-0.363689121521727	0.716090167642715	0.939249975080009
Ambra1	1062.06387163355	0.091415383179046	0.111999205451565	0.816214568759414	0.41437742577515	0.84360626545355
Amd1	256.413911096226	-0.0337575758083095	0.129918177323902	-0.259837202950806	0.794989352482464	0.959062651939419
Amd2	28.7712050148799	-0.524559886501976	0.317493790671187	-1.6521894346124	0.0984959395823237	NA
Amdhd2	679.196460301219	0.0910250753120103	0.163300572531925	0.557408182351687	0.577248576274889	0.894469677173
Amer1	173.791615655472	-0.0878960146042621	0.153133166740325	-0.573984176486806	0.565978509071165	0.893199739973878
Amfr	3038.22750361616	-0.0753741380600748	0.11749178264582	-0.641526891180897	0.521180415228075	0.882017382914846
Amigo1	88.2270669606259	-0.128947417753163	0.212653624916511	-0.606373005885927	0.544267089508004	0.888009770835405
Amigo3	60.7934705403651	0.299145655082848	0.21877845238656	1.36734514674364	0.171517146993284	0.67132197436774
Ammecr1	272.375213610502	-0.285445198344634	0.117865236848225	-2.42179293893245	0.0154441477229973	0.344096772482493
Ammecr1l	634.643720221221	0.119078101186072	0.144736505008161	0.82272334252757	0.410665338003117	0.84096692886838
Amn1	444.331907988222	-0.102034918123206	0.17076920801268	-0.597501852416095	0.550172370604512	0.889415317618015
Amot	184.514950095494	-0.0187987829305859	0.254687027493557	-0.0738113091804863	0.941160528149536	0.990686525531572
Amotl1	75.1240835286703	-0.0460352138860197	0.204179141731114	-0.225464822193464	0.821617688674327	0.964794379221003
Ampd2	604.200672502016	0.0239524451688966	0.166148762350745	0.144162645751957	0.885372037137376	0.97813905548416
Ampd3	1073.92180303873	0.32785078543088	0.133018905865033	2.46469314492431	0.0137130633712874	0.340876905506944
Amz1	306.905350646942	0.0848030987311027	0.172651741402544	0.491180094925199	0.623299076052724	0.910484715766215
Amz2	285.43176830173	-0.0258822575686449	0.143031287736104	-0.180955216011187	0.856402728062276	0.972328695426226
Anapc1	2758.04396047829	-0.0110517117317411	0.0902625245044989	-0.122439648042308	0.90255084011205	0.980502671193999
Anapc10	85.9812627235133	-0.15063026461181	0.223919467006963	-0.672698388510928	0.501139193023699	0.876161312177623
Anapc11	434.880626597771	-0.0614689237234058	0.119168983604449	-0.515813107271571	0.605984947127002	0.905627849238814
Anapc13	204.737997219857	-0.0846698179326922	0.192313503261624	-0.440269749636389	0.659741747411695	0.920730314948142
Anapc15	128.143211431271	-0.00435579870674406	0.199842981516931	-0.0217961054908252	0.982610600818407	0.997201371986595
Anapc16	277.076579008794	-0.0770045902770141	0.128540536608742	-0.599068529730855	0.549127186534514	0.888895881009356
Anapc2	1747.30013263011	0.0801144697948526	0.0823141047924889	0.973277544557138	0.330415379782832	0.798293377667663
Anapc4	610.090760168964	0.000770854008692934	0.0975187600609312	0.00790467401565906	0.993693048325254	0.999799152536572
Anapc5	1971.19319126468	-0.241819338471712	0.180612162913057	-1.33888734053929	0.180607351496666	0.677655924496935
Anapc7	608.625294520542	-0.0554385520494357	0.126866926544973	-0.436981911355624	0.662124466394394	0.921548279191846
Angel1	80.3912767353068	-0.0414662805030384	0.225059885249384	-0.184245541834746	0.853820833756666	0.97199233025551
Angel2	596.90299298915	0.0603475139531946	0.0987869195219601	0.610885674391127	0.541275269378514	0.887227176072516
Angpt2	124.661223262694	-0.261907908382804	0.171902635101473	-1.52358285972872	0.127612947554926	0.624459471255187
Angptl2	230.037660903435	-0.0270588299420946	0.172108375945495	-0.157219715736926	0.875071690616774	0.976232868654562
Angptl3	80.4950355178604	-0.067406199799197	0.290719831353642	-0.231859654999599	0.816647021292864	0.963593937312876
Ank	5457.70010769275	-0.15731125707504	0.245226722084205	-0.641493128228593	0.521202344124022	0.882017382914846
Ank1	36.8365026369387	-0.149770053647586	0.320945357980778	-0.466652811524871	0.640748296114878	NA
Ank2	618.961887775775	-0.0844120029572296	0.427654259363588	-0.197383753602377	0.843527242276438	0.970334666411356
Ankdd1a	39.7001069788117	0.450115378032831	0.293395427136286	1.53415948716797	0.124990421603938	0.621720544082125
Ankfy1	3892.82173601267	-0.0136483903443047	0.0741433130687188	-0.184081204081814	0.853949751474089	0.97199233025551
Ankhd1	2371.01641362729	0.0766598783132727	0.103989470154619	0.737188853826153	0.461007510743416	0.863778283166487
Ankib1	996.065058148743	-0.0049714694549183	0.114026653899406	-0.0435991874259866	0.965223899423479	0.995246688432371
Ankle1	73.4395495430408	-0.134997409905317	0.286340015088867	-0.471458415839712	0.637313408818087	0.914785417132227
Ankle2	994.510565204841	0.0823261414238173	0.0821409451943088	1.00225461527221	0.316220636087388	0.788873755889249
Ankmy2	291.75742606277	0.0377256697603341	0.143775949869681	0.262392074575259	0.793019182264258	0.959062651939419
Ankra2	156.278309491952	0.0241315265455028	0.154596144092778	0.156093974316854	0.875958947944074	0.976297159368851
Ankrd10	607.81229962432	0.153925958790976	0.162902279529607	0.944897513008717	0.344711201349059	0.805919077881303
Ankrd11	3257.15203010156	0.0698561021563026	0.0954186998425149	0.732100754585815	0.464107073289264	0.866006177701102
Ankrd12	802.994628614491	0.188924770850823	0.124030362368598	1.52321389088076	0.127705201917031	0.624459471255187
Ankrd13a	3804.91287348509	0.0544241265755969	0.108503958583681	0.501586553025378	0.615958380285309	0.907696371491129
Ankrd13b	1017.82352497717	-0.129615919115896	0.22603311797867	-0.573437734589526	0.566348346857	0.893199739973878
Ankrd13c	1188.63793195929	-0.0879409791075218	0.0871192264483769	-1.00943250637828	0.312767255401539	0.788873755889249
Ankrd13d	88.72255428028	0.319812706428297	0.216466047050082	1.47742664859725	0.139561307189397	0.635749490436557
Ankrd16	272.468062576468	0.160822613488827	0.133536048644288	1.20433856716268	0.228458745859005	0.721078647210282
Ankrd17	4697.63308227785	0.0614624498795047	0.0967646149498253	0.635174850965659	0.52531438351099	0.882017382914846
Ankrd2	29.8365523451091	-0.605874858134802	0.475164849528065	-1.27508349730953	0.202279689816701	NA
Ankrd24	176.197394883759	0.283029541575641	0.180691553186709	1.56636841393015	0.117262393092712	0.609610151459613
Ankrd26	131.507128494034	-0.146131263196371	0.191586251377183	-0.762743997264594	0.445616085892415	0.859302757799466
Ankrd27	350.907049464288	-0.0103438023493852	0.126509240464303	-0.0817632159628996	0.934835007507058	0.989720437731918
Ankrd28	1454.18132470473	-0.160217074830152	0.163539942483087	-0.979681614151973	0.327243304471777	0.797125953124532
Ankrd33b	1565.39407608947	0.162248688808505	0.191212865700674	0.84852391189247	0.396146261362435	0.835984880299822
Ankrd39	36.5897822648545	0.242864408452609	0.280477259868195	0.865896966359193	0.386546666882995	NA
Ankrd40	1098.50196706824	-0.0620566569933406	0.0966107879745902	-0.642336723406731	0.520654574953408	0.882017382914846
Ankrd44	1148.65663883946	0.236447925420359	0.123762325629316	1.91050001862887	0.0560688639921709	0.501217073020183
Ankrd46	227.800121156202	-0.031738221833175	0.142325917564899	-0.222996783552812	0.823538009833442	0.96542340327918
Ankrd49	185.802813156988	-0.137297893870979	0.132010416341201	-1.04005348726506	0.298315051490188	0.778405327970325
Ankrd50	1020.51387863405	0.112845158479212	0.133572155622431	0.844825464958366	0.398208294499802	0.837125793462739
Ankrd52	1858.5466046037	0.131814465782106	0.10143056125792	1.29955374541333	0.193753961580093	0.692431014840882
Ankrd54	123.000255589495	-0.0549116171856936	0.228634830385196	-0.240171705654735	0.810197147418381	0.962684050658319
Ankrd6	29.5219818994513	0.132883206456809	0.413623360560237	0.32126620284895	0.748008666179604	NA
Ankrd61	84.9361755159646	0.222347525271998	0.310422731090232	0.716273336334277	0.473822587526015	0.867506393064361
Ankrd63	28.9828845543204	0.192889580668724	0.336937672181997	0.572478522272613	0.566997832387259	NA
Ankrd9	44.9356935003757	0.361002391406863	0.257835983009074	1.40012416883705	0.161476138728762	0.662288275098873
Anks1	760.72940488349	0.427145937499303	0.120796645695753	3.53607449146512	0.000406120159845272	0.0962748450929202
Anks3	250.566849440002	0.113140127722037	0.170746805800642	0.662619292885249	0.507574410758795	0.877971155439239
Anks6	115.817437024302	0.0573502824464089	0.29555501657317	0.194042662890179	0.846142476556442	0.970969229752412
Ankzf1	216.367686301567	0.16566914712177	0.134625430042134	1.23059326213421	0.218475026533355	0.712647888174613
Anln	846.215488705711	-0.643337621235623	0.229297622615413	-2.80568814407053	0.0050209259828601	0.253246960318471
Ano10	646.447304937542	0.085565988465084	0.148526740931755	0.576098202440192	0.564548806397399	0.893199739973878
Ano6	3032.29130257637	-0.0317755361493984	0.0993492521240733	-0.319836691973436	0.749092131242072	0.949180279763378
Ano8	346.938122197686	0.0175743113643954	0.136078648961594	0.129148191126996	0.89724039026742	0.979652801545349
Anp32-ps	31.0814285043395	-0.286393077876794	0.354911842600962	-0.806941452778724	0.419700214964395	NA
Anp32a	556.29457683333	-0.0768910343701317	0.16476947517256	-0.466658246556924	0.640744406965853	0.914847478476245
Anp32b	829.309812879325	-0.238820606238867	0.1318395057018	-1.8114494966254	0.0700713000309245	0.532748633269113
Anp32b-ps1	204.96415178655	-0.386982364617864	0.176535886625529	-2.19208894018664	0.0283730851872738	0.409324926535682
Anp32e	906.304051010565	-0.492878248474591	0.139094502289567	-3.54347756641393	0.000394886905291623	0.0955223364984002
Anpep	7159.60134609331	0.325963894155932	0.184832491296203	1.76356381862299	0.0778054437827806	0.546020085942746
Antxr1	37.5281802474074	0.336876370151059	0.368928540272256	0.913120925538739	0.361178945963866	NA
Antxr2	6924.05868904937	-0.155013117304918	0.160992724015104	-0.962857907108741	0.335618835906884	0.800903978660016
Anxa1	13745.5342859445	-0.288836024428273	0.111926875830832	-2.58057792004151	0.00986350941865651	0.294788353626955
Anxa11	417.246922580636	0.0305387434521141	0.12778861653649	0.238978590423927	0.811122184173707	0.962684050658319
Anxa11os	86.9314945276731	-0.125248526198738	0.234754125917048	-0.533530670481147	0.593666285819005	0.899888817741872
Anxa2	6929.78884404856	-0.211289573696004	0.106183089683798	-1.98986085567111	0.0466062654565009	0.474591120666585
Anxa3	1229.65936590671	0.186200375300702	0.121518483041666	1.53228028066198	0.125453285076689	0.621720544082125
Anxa4	6601.55303800437	-0.134094367073402	0.0933594723416348	-1.43632310369862	0.150910422795589	0.650924760333376
Anxa5	7240.45352886899	-0.098028036910917	0.0832032743806245	-1.1781752297689	0.23872675543136	0.728228394489874
Anxa6	1783.13248508985	0.25926809923294	0.116105095049707	2.23304669895789	0.0255458649722954	0.403189264336375
Anxa7	1966.60969690915	-0.0175974472162249	0.142094089830792	-0.12384362528505	0.901439089688118	0.980502671193999
Anxa9	72.1972311685874	-0.0441110002922727	0.234630680631667	-0.188001842612902	0.850875206741164	0.971819914777289
Aoah	1331.60389078506	0.342303688537474	0.192937993307162	1.77416424142298	0.0760359871301799	0.541356753348712
Aoc2	35.1304356414754	0.381428929350189	0.292169300844683	1.30550652737112	0.191720425957752	NA
Ap1ar	390.964654335709	-0.0844592517745843	0.130704861621052	-0.646182940153015	0.518160886494413	0.882017382914846
Ap1b1	2480.19326983758	0.300539866049415	0.121680415319499	2.46991157336438	0.0135146454490253	0.339383670566308
Ap1g1	2107.0993334952	0.0102713409774009	0.0861694119789425	0.119199385739234	0.905117393289679	0.981012844062049
Ap1g2	726.754491538062	0.0883759772372245	0.115745923113238	0.763534255550092	0.445144841043011	0.858937105303895
Ap1m1	795.271974935046	-0.0978656941075669	0.0912952073892294	-1.07196967843366	0.283733651497105	0.767895921286766
Ap1s1	1372.0344525755	-0.213880637840544	0.135380163927473	-1.57985211153332	0.114140738311218	0.604517502771613
Ap1s2	894.72159535931	-0.0549599101253847	0.118722919556782	-0.462925864109151	0.643417507695746	0.915003360740068
Ap1s3	128.319719274822	-0.497972850061434	0.252960507264287	-1.9685794254878	0.049001407134742	0.478429718919355
Ap2a1	1356.00448086365	0.210431899061693	0.104998544021955	2.00414111473482	0.0450549462548241	0.470516544456767
Ap2a2	1968.0926639278	0.259074597142868	0.115833071521982	2.2366202824355	0.0253111681522302	0.402026580321932
Ap2b1	3368.19867430804	0.0546567145299573	0.101582167285892	0.538054227334332	0.590539611680169	0.898770948434017
Ap2m1	879.058709817732	-0.0712515709745214	0.0867004020315937	-0.821813616833717	0.41118298266637	0.841091434999177
Ap2s1	1616.83371227824	-0.038864022200943	0.125259939515872	-0.310266972434698	0.756357944847924	0.951646944936644
Ap3b1	2166.09591499187	0.0293207836758286	0.0929079150600723	0.315589728354902	0.752313935124509	0.950427959706745
Ap3d1	4437.37750530888	0.113821320178614	0.129068904451828	0.881864773409428	0.377849938689901	0.823970792276835
Ap3m1	721.604200009039	-0.19908558205492	0.0959079266482863	-2.07579903989591	0.0379125412139876	0.445369029741719
Ap3m1-ps	227.807282007893	-0.295514965573016	0.141771136889146	-2.0844508413873	0.0371191773332149	0.44041402295355
Ap3m2	175.761657093404	0.257355478135975	0.149772483310399	1.71830948147273	0.0857401808687056	0.561338788231935
Ap3s1	370.65264933419	-0.238779997796021	0.140149573681518	-1.70375115331164	0.0884275871171755	0.566817055839805
Ap3s1-ps1	99.8742236212899	-0.0969060165813281	0.196261636996458	-0.493759341175154	0.621476150912378	0.90951011613642
Ap3s1-ps2	66.2787071174951	-0.00965247092498759	0.207869858305696	-0.0464351638263618	0.962963410049377	0.995118160358785
Ap3s2	549.840219666539	-0.0154949076939126	0.1103012408662	-0.140478090475052	0.888282262095007	0.978419033234799
Ap4b1	40.2299310095938	0.210456383961129	0.305823825262886	0.68816215930927	0.491350670404198	0.873509812852559
Ap4e1	339.272181963472	0.0810003573877545	0.127691139943711	0.634345949323198	0.525855075483368	0.882017382914846
Ap4m1	148.969948933566	0.287384731567554	0.192413568307426	1.49357830684991	0.135285872919545	0.632580143816374
Ap4s1	113.115733311438	0.109988342356585	0.165994791475046	0.662601165851154	0.5075860233146	0.877971155439239
Ap5b1	349.436642747545	0.26648793888681	0.142217102141663	1.87381077854729	0.0609565102588299	0.513006367778459
Ap5m1	220.709714480385	-0.12151224549464	0.126428036597257	-0.961117871993245	0.33649290450616	0.80095139363495
Ap5s1	352.723904140007	-0.0543959088984636	0.138166088867479	-0.393699418897477	0.693802970442255	0.93139005166201
Ap5z1	645.89087373878	0.232227437829818	0.101115391533448	2.29665765328119	0.0216383069541137	0.389841285312667
Apaf1	1252.26553845962	0.0433275793905617	0.14257147917818	0.303900749577079	0.761203506703993	0.952370580835246
Apba1	130.330668867798	0.692613047210961	0.1865492178971	3.71276307142175	0.000205008787813177	0.084500070366406
Apba3	277.903384439034	0.0533902610306705	0.142653224901733	0.374266064208844	0.708206377251503	0.936605557300593
Apbb1	699.733629868835	-0.135757766933011	0.276586832919743	-0.490832356334202	0.62354502306339	0.910491020927891
Apbb1ip	2264.29066886215	0.0273307111708946	0.104500126057147	0.261537590451792	0.793677964975237	0.959062651939419
Apbb2	1729.38016520146	-0.170508671308995	0.17637045061391	-0.966764391174875	0.333661829269	0.799298591837882
Apc	2091.48503195563	0.0395062684250701	0.114345538140632	0.345498994254433	0.729719266247249	0.94426062715803
Apeh	717.311128161477	0.0944247108581456	0.111225394872004	0.848949207748894	0.39590955584389	0.835984880299822
Apex1	59.5336099191486	-0.180686571416735	0.239357131687168	-0.754882756753983	0.450319332812454	0.860687869121498
Apex2	176.311470075776	-0.0667668579946267	0.152128992905964	-0.438883191949463	0.660746176227286	0.921226070938409
Aph1a	276.853338212488	-0.0313792046452464	0.131484030450696	-0.238654112881131	0.811373801238218	0.962684050658319
Aph1b	287.1992642137	-0.000770286275717514	0.189828704059765	-0.00405779663056121	0.996762355602621	0.999799152536572
Aph1c	711.851716225929	0.247178228823549	0.140808049903598	1.75542683101411	0.0791863259811508	0.550173225002685
Api5	2042.77817142292	-0.0710620337384717	0.0851089764163456	-0.834953452980594	0.403743916745126	0.838606407580697
Apip	163.555610574065	0.0121896776136497	0.163563785471293	0.0745255288542407	0.940592228557537	0.990686525531572
Aplf	90.2895030114663	-0.348611218607841	0.198376522459807	-1.75732094849315	0.0788631190934163	0.549538242571583
Aplp1	38.0177388055246	0.488090336801226	0.299319471491005	1.63066684024896	0.102960637097262	NA
Aplp2	6755.89481681633	0.0845825859687368	0.123964236900432	0.682314416509281	0.495040159073975	0.874317674361539
Apmap	415.195029645739	-0.19326345588588	0.119361752300853	-1.61914057192086	0.105417021056761	0.590477792508547
Apoa1bp	399.378826685482	-0.0624779928060433	0.108910386838972	-0.573664226337008	0.566195040723996	0.893199739973878
Apobec1	3145.95323853045	-0.0372738282719385	0.178712796934257	-0.208568322534006	0.834785241649523	0.968735233973196
Apobec3	1011.31379118157	-0.0441864521967815	0.248321571280597	-0.177940450235199	0.858769743042671	0.97248473911195
Apobr	975.149927044029	0.0708718146103423	0.1324409847654	0.535119961059497	0.592566907846687	0.89916385720139
Apoe	2497.8596183529	0.343570513167889	0.46250314250187	0.742850116237859	0.457572429653279	0.862538989177867
Apoo-ps	215.918720101915	-0.284269488426554	0.195110379237893	-1.45696753569399	0.145125341821142	0.643512435574892
Apool	168.961128990552	-0.0790289003947998	0.155402611632865	-0.508542936083362	0.611072636118598	0.906740605397314
Apopt1	141.803316993659	-0.197593710841885	0.200657620848736	-0.984730657156747	0.32475638972484	0.794674655338725
App	9461.22651577183	0.105060180700171	0.113731408267949	0.923756966524598	0.355612865118269	0.813878990200201
Appbp2	911.193222870405	-0.0611012408441714	0.0859429876983272	-0.710950858011196	0.477114688650346	0.868705617104382
Appl1	1002.13888855029	-0.17210125134686	0.099901042632609	-1.72271726912572	0.0849396658663918	0.561338788231935
Appl2	1074.71777605714	0.228301315844382	0.127903180645914	1.7849541715183	0.0742687507233097	0.540161434909833
Aprt	745.43257002722	-0.277579418893444	0.13645629981628	-2.03420010118381	0.0419314243641639	0.458770766672456
Aptx	203.123667974309	0.0269277835913584	0.129547545119794	0.207860238234989	0.835338096332248	0.968907178376175
Aqp9	25.9184003736454	-0.280142130991936	0.576865793394619	-0.485627912418614	0.627231002629207	NA
Aqr	1178.54286534673	-0.0586725193313446	0.0785091950031106	-0.747333090461823	0.454862522857513	0.861397265286804
Araf	739.903673222543	0.119844925115812	0.0999033724807391	1.19960840299879	0.230291461532445	0.72212822580531
Arap1	5468.01324991625	0.219090533759705	0.0880036817551309	2.48956099779236	0.012790096890593	0.335350937919537
Arap2	785.157486218113	-0.168187125659349	0.198127897740367	-0.848881594048643	0.395947181666917	0.835984880299822
Arap3	1411.9630310819	0.136167671248218	0.142862241818796	0.953139678578827	0.34051930450119	0.803402353619892
Arc	65.5887185952016	0.634316767758508	0.419633850750202	1.51159580339981	0.130636719944885	0.629191395564054
Arcn1	3230.10679058893	-0.172938218031168	0.113167095073263	-1.52816698103994	0.126471084579911	0.622807867971277
Arel1	1338.16554391398	0.13457975902573	0.0842466634258567	1.59744912799034	0.110165628870927	0.597963796984262
Arf1	5954.76539794311	-0.183505784792569	0.111230551332412	-1.64977861382852	0.0989882244183019	0.583651340627123
Arf2	758.031891792012	-0.0690971662932221	0.109853968702813	-0.62899107887627	0.529354896692684	0.882017382914846
Arf3	3658.76287954463	0.0879358748909322	0.107591054844547	0.817315854166371	0.413747948814391	0.84321775056688
Arf4	1873.42491631557	-0.021648443829641	0.168138123026248	-0.128753928258504	0.897552361917588	0.979652801545349
Arf5	1073.85842632734	-0.0122272740759892	0.121551169426421	-0.100593635862885	0.919873048926001	0.985279828768369
Arf6	3271.70114612294	-0.183992456511249	0.072862123902928	-2.52521401594574	0.0115627849275979	0.320968828446881
Arfgap1	767.873783971286	0.119758834376792	0.0929982551787245	1.28775356211403	0.197831762008348	0.696409823226395
Arfgap2	590.316974227797	-0.00564465639583819	0.101129301177094	-0.0558162306091037	0.955488204944413	0.993543441811223
Arfgap3	410.806719149539	0.100425180040113	0.115117284636481	0.872372731490649	0.383005071514221	0.826914228170867
Arfgef1	1817.54830081797	0.0480056056145431	0.0950191206082201	0.505220478860022	0.613403988241635	0.90749915378462
Arfgef2	3605.7712139008	0.0803124057740755	0.128959033120566	0.622774565151944	0.533432674845109	0.884397237140872
Arfgef3	1042.11520758575	-0.161392972430509	0.205419051492976	-0.785676748371254	0.43205688856718	0.852130299858327
Arfip1	87.583525746665	-0.0873201414245839	0.186110893166174	-0.469183398881536	0.638938550674088	0.914826810632399
Arfip2	343.79715225804	-0.00207569824515899	0.105210373937347	-0.0197290264018554	0.984259535562833	0.997727552811619
Arfrp1	277.697536407998	0.0675974054698709	0.172761725732359	0.391275354441598	0.695593713991872	0.931810478703929
Arglu1	631.003850309731	0.0283676704816037	0.142632322627817	0.198886689629432	0.842351381658521	0.970158478108942
Arhgap1	985.051831016518	0.0725545872770035	0.0794848603293093	0.912810149963234	0.361342399152229	0.816897092723893
Arhgap10	2462.9058482352	-0.0481821335801747	0.120660072662146	-0.399321271047856	0.689656495820814	0.929554064699125
Arhgap11a	1046.50909914535	-0.219197381920482	0.149113810987876	-1.47000053494914	0.141561609099878	0.637384892732345
Arhgap12	860.942430439307	-0.119401044715838	0.150544326942841	-0.793128822191835	0.427702771910218	0.848668934376176
Arhgap15	431.751209845022	-0.0478744837508005	0.226432648049852	-0.211429244692047	0.832552338537997	0.968216527304665
Arhgap17	1459.80145280654	0.299448014929655	0.109533738749903	2.7338427259694	0.00625999373028858	0.272501620175231
Arhgap18	1772.24644406342	-0.0194879231215355	0.111457280910941	-0.174846568678695	0.861200195400672	0.973088961744008
Arhgap19	648.474061549861	-0.0848965749897666	0.286764391920353	-0.29604991896395	0.76719195929383	0.954446781126061
Arhgap21	1459.90558803333	-0.010349199369019	0.0793784525541225	-0.130377943081754	0.896267416497534	0.979652801545349
Arhgap22	369.395973785567	0.10799618269813	0.182182796499281	0.592790234716571	0.553321543838858	0.890060808333697
Arhgap23	602.756961202592	0.278593607907788	0.124544118842885	2.23690697317664	0.0252924207166223	0.402026580321932
Arhgap24	238.636483558143	-0.150455964774267	0.16721586860821	-0.899770853248315	0.368242208409187	0.818022392212314
Arhgap25	814.891482004251	0.0581749880751701	0.130441434405809	0.445985497937604	0.655607721484444	0.919526484765722
Arhgap26	179.562154006737	0.223130657129007	0.194134853266458	1.14935908403192	0.250407944248266	0.73701219329054
Arhgap27	456.158784190232	0.20186587403426	0.1140179405389	1.77047465583181	0.0766481027418557	0.542394007044308
Arhgap27os3	42.4277380006141	0.543201021271508	0.29495647016056	1.84163114298125	0.0655291224178385	0.519978942308265
Arhgap28	57.8013151982794	0.0192899860286528	0.266767008417506	0.0723102385976562	0.942355016805739	0.991191233844922
Arhgap29	199.774057695883	-0.02331819992647	0.270338234616386	-0.0862556491853951	0.931263193845127	0.989077016077099
Arhgap30	2513.88463528727	0.0847249718584165	0.160039079554916	0.529401769205653	0.596526771139276	0.901061783906441
Arhgap31	4898.34694578982	0.211619330762331	0.169799215968452	1.24629156592601	0.212657373106912	0.708548838668287
Arhgap33	46.1236173051236	0.317440587453726	0.3787086190771	0.838218544450659	0.401907973783458	0.837337859186443
Arhgap35	592.199420112974	0.0691816285694216	0.105093939212606	0.658283713482912	0.510355841275951	0.879340012178426
Arhgap39	432.402440233968	0.232204054564174	0.118413936825238	1.96095207025228	0.0498846143066807	0.48057354437689
Arhgap4	866.687165641879	0.213583930625205	0.126281110429027	1.69133712793287	0.0907724327870523	0.567172190735335
Arhgap5	914.875141748769	-0.167982834361288	0.0974395620587089	-1.72396951312317	0.0847133469875726	0.561338788231935
Arhgap6	338.679156816823	0.0350872233154366	0.132519104928918	0.264771055722548	0.791185835528728	0.958765303946085
Arhgap9	919.728272004063	0.139453316670129	0.102404365544419	1.36179073937662	0.173263934957952	0.671732458386179
Arhgdia	8428.54927507781	-0.00360726264741763	0.105089932419178	-0.0343254826069272	0.972617604657958	0.996640797379354
Arhgdib	2965.70925984659	-0.0785936089469045	0.0903218228847043	-0.870150827748784	0.384217983930671	0.827874161703371
Arhgef1	3077.16705718206	0.235123591352045	0.113264799275215	2.07587523093325	0.0379054920954613	0.445369029741719
Arhgef10	38.4632944964614	0.244227010089481	0.264243251762511	0.924250698780305	0.355355804871088	NA
Arhgef10l	276.844450409806	0.115201491409432	0.296156087642426	0.388989104787622	0.697284206064511	0.931911531425944
Arhgef11	1103.80383954936	0.1061204555527	0.0860836141187642	1.23276022549764	0.217665234842591	0.71222977918548
Arhgef12	2158.79101753247	0.0809501710535699	0.182311305663503	0.44402167358168	0.657026914195968	0.919642961258458
Arhgef18	131.496859201485	0.182001489295119	0.205212265943841	0.886893814353793	0.375136072249525	0.820991112328956
Arhgef2	3711.86211276075	0.180005469511167	0.0880772108293358	2.04372354456089	0.0409808658865487	0.455073108673011
Arhgef28	54.5199525905737	-0.164373268358265	0.394789380764323	-0.416356863601636	0.677148888446353	0.92582635805075
Arhgef3	587.464355741973	0.272483607487952	0.16159635007042	1.68619902225026	0.0917574721719593	0.570474724058862
Arhgef39	76.6112330221901	-0.32759759018262	0.333035902484956	-0.983670492395089	0.325277552734241	0.795443538799043
Arhgef4	65.9502618609476	0.328451971696023	0.210400999762192	1.56107609786674	0.118505796939232	0.611514676151813
Arhgef40	67.258543263464	-0.0306856876006242	0.257985794521665	-0.118943322664408	0.905320258841057	0.981143003386948
Arhgef6	2371.48780844927	-0.0555169384543781	0.115925254784324	-0.478902880633438	0.632007721570075	0.912944269438469
Arhgef7	4066.8008369474	0.0844406150664887	0.120725229177232	0.699444645017193	0.484274195406208	0.870797794033905
Arid1a	2678.62880787286	0.161678820505045	0.102762356175307	1.57332730118829	0.115643050857562	0.606243733664168
Arid1b	1965.44503920467	0.146225211012394	0.0840378073537479	1.73999317232154	0.0818602168514165	0.556512378561821
Arid2	1459.30888117853	0.0624392546279781	0.0975027549929235	0.640384516647861	0.521922646444423	0.882017382914846
Arid3a	499.352465328008	0.23046304255853	0.15432145117372	1.49339603020643	0.135333551499518	0.632580143816374
Arid3b	130.159757481225	0.445285460966377	0.216130536990083	2.06026166948731	0.0393735321794563	0.45178555365256
Arid4a	821.230499603568	0.134953567434009	0.126723631702276	1.06494396996977	0.286901285712824	0.769822748446368
Arid4b	861.725670847405	0.222632163497876	0.12530868891605	1.77666980178069	0.0756225836381991	0.540161434909833
Arid5a	629.763638198848	0.233152016496222	0.188967374391207	1.23382153796317	0.217269411871517	0.712216068258925
Arid5b	790.761583143263	0.318201539775974	0.170123275468555	1.8704174305343	0.061425873310501	0.513577548418266
Arih1	3371.75261911484	0.0218305353816806	0.10708729459934	0.203857380685151	0.838464950925008	0.969532759448276
Arih2	979.922262890775	0.164259309225302	0.116696724036061	1.40757429638336	0.159257162988656	0.659710249269491
Arl1	983.318807180215	-0.111193544833566	0.111657359532453	-0.995846089314408	0.319324932605814	0.790398931120878
Arl10	52.9387296927302	0.244645254497937	0.238795506289068	1.0244968940152	0.305600637128716	0.783312698093514
Arl11	626.386265536553	-0.00631451950956012	0.133807981915474	-0.0471909031073273	0.96236107771478	0.995118160358785
Arl13b	109.633150930318	0.0909910245344993	0.178261816033151	0.510434744575797	0.609746920578954	0.90604976111964
Arl14ep	322.276825399274	-0.0693414031299395	0.1091823175798	-0.635097373521667	0.525364909940469	0.882017382914846
Arl15	167.791004809528	0.190639769175168	0.158391698190913	1.20359697732002	0.228745388353929	0.721078647210282
Arl16	52.7359972564044	-0.000845066121783796	0.225512858652965	-0.00374730792218035	0.997010087861869	0.999799152536572
Arl2	139.605079621766	0.044763660332491	0.181527634826657	0.246594191431164	0.805222300320648	0.961925373645325
Arl2bp	325.630025878736	0.162563475124629	0.147233813500395	1.10411780595625	0.269542038203152	0.752916414136429
Arl3	33.5959879370882	0.289784795506177	0.347255023063781	0.83450137869698	0.40399851077225	NA
Arl4a	207.088602909008	-0.110901900279635	0.155187179240033	-0.714633134146341	0.474835765040468	0.867506393064361
Arl4c	2144.3004328863	0.245694896591489	0.171460064578185	1.43295698153346	0.151870131484119	0.65283478679366
Arl4d	74.9582496362132	0.04747581398701	0.233771714561592	0.203086220572256	0.839067641702211	0.969637436229238
Arl5a	1579.28899715698	-0.0744001256140272	0.093676867190559	-0.794220898342824	0.427066844370069	0.848665114428802
Arl5b	1069.79514197668	0.214547316247309	0.170420838067292	1.25892654138101	0.208056866129409	0.706803233068027
Arl5c	286.075825769082	0.643046164356137	0.189974544458585	3.38490699471752	0.00071202375451095	0.131869024409661
Arl6	27.8897488106941	-0.673646861426131	0.327155387032484	-2.05910368017031	0.0394843073770381	NA
Arl6ip1	2574.82332576326	-0.166712979441879	0.11871403238958	-1.40432412315658	0.160222354039093	0.660896013791916
Arl6ip4	215.940830544177	-0.182210455003868	0.145187658032809	-1.25499961548173	0.209478899552793	0.708201196919353
Arl6ip5	1863.24385602716	-0.0586831823667043	0.10897006697255	-0.538525707077768	0.590214162365061	0.898770948434017
Arl6ip6	257.99579936699	-0.135436924172789	0.154879463349332	-0.87446664163156	0.381864179039739	0.825804800977563
Arl8a	1457.14745464918	0.0763698940006241	0.112303245116104	0.680032833616425	0.496483671359039	0.874934465923885
Arl8b	5262.705980906	-0.177760206294222	0.123025878081769	-1.44490093520059	0.148485713614801	0.647300915262565
Armc1	663.429314837013	-0.191776353741993	0.12072664671366	-1.58851719121172	0.112169436812323	0.600245749226396
Armc10	322.141233153713	-0.0433153059706018	0.136010719470645	-0.31846979516898	0.750128602834557	0.949778347581728
Armc5	430.285109687339	0.113385973603307	0.138522468678998	0.818538499094025	0.41304976810994	0.842216622168519
Armc6	102.509726530297	-0.22939520096595	0.237170068815324	-0.967218174332832	0.333434978581978	0.799298591837882
Armc7	159.508991981034	0.024808572744743	0.13873065610958	0.178825455313549	0.858074757001944	0.972328695426226
Armc8	533.772801084922	0.0159668620307453	0.101801315595494	0.156843376113029	0.875368286686682	0.976235137411937
Armc9	86.1015856783702	0.00523578150837436	0.184197847133322	0.028424770375219	0.9773233682782	0.997201371986595
Armcx3	133.435892382626	-0.128539314525647	0.180051779751085	-0.713901938116625	0.475287818827298	0.867506393064361
Armcx5	85.5237444966679	0.23068850037654	0.204881055041435	1.12596306344618	0.260181154029479	0.743266900240953
Armt1	224.412484880528	-0.00788407030886162	0.143138069548966	-0.0550801777172533	0.956074588057908	0.993630170298148
Arnt	1235.7282970764	0.129654603128925	0.0956042353323863	1.35615961655	0.175048387836516	0.673399433287697
Arntl	149.521437802431	0.0974651468687689	0.155721551159104	0.625893758078395	0.531384628946732	0.88270510314039
Arntl2	26.6388866524198	-0.283145152897998	0.410790834599851	-0.689268428235036	0.490654362086931	NA
Arpc1a	659.075120912014	0.0459453685577867	0.0977754080398487	0.469907203445896	0.638421317569262	0.914826810632399
Arpc1b	9545.20916630059	-0.061224460920732	0.0812847078688013	-0.753210075129411	0.451323685960144	0.861024152261157
Arpc2	8236.13450710541	-0.123738497381669	0.104653072847598	-1.18236850590965	0.237059514008738	0.727291589603417
Arpc3	2042.62152107246	0.0305419173494591	0.137505587158033	0.222114009915522	0.824225131912709	0.965754563850071
Arpc4	3038.91471856603	-0.0904167860955018	0.0955485899046411	-0.946291161237849	0.344000100311006	0.805919077881303
Arpc5	4437.41726450334	-0.191545797765838	0.0907880318882866	-2.10981330668707	0.0348744398407836	0.432900154725386
Arpc5l	258.073383178916	-0.180870388101402	0.12226810098244	-1.47929334510053	0.139061930723905	0.635183454670693
Arpin	409.587560459528	-0.0986689345648674	0.185414432934041	-0.532153473726437	0.594619704015879	0.900239827230983
Arpp19	544.248837297194	-0.152598372498935	0.156211986674902	-0.976867241414145	0.328634881439776	0.797761578981037
Arrb1	3810.5759626881	0.247101693592789	0.0956726482586361	2.58278304291095	0.00980069332868791	0.294095235506172
Arrb2	1840.16688136348	0.248081421594521	0.162645713754384	1.5252871770673	0.127187484691572	0.624421250179541
Arrdc1	421.493459665139	0.321404341150002	0.136307562537191	2.35793477021723	0.0183769217874686	0.373622047936303
Arrdc2	603.444847986617	0.164184726552207	0.192431099868858	0.85321305477181	0.393541165126433	0.83478327565115
Arrdc3	708.373974345846	-0.0298944779592375	0.174898034689561	-0.170925179418393	0.864282597690549	0.973344881710843
Arrdc4	514.313702692078	0.367441024620217	0.188086376883924	1.95357596178792	0.0507513857470591	0.481630244403436
Arsa	767.41022919402	0.00644940300127549	0.0981066158910446	0.065738716422938	0.947585847817004	0.991638142899669
Arsb	5074.15360617912	-0.298406481662381	0.462045076971845	-0.64583846151566	0.518383976613129	0.882017382914846
Arsg	122.22443495319	0.340517908232136	0.197316867770543	1.72574150441167	0.0843939276243581	0.561135305338573
Arsk	207.182318658645	-0.0190041380443544	0.142929131707541	-0.132961963858007	0.894223461793028	0.979652801545349
Art2a-ps	299.91650212633	0.0472056522847874	0.209749851110934	0.225056904854826	0.821935005893512	0.964911796779491
Art2b	29.5657731667799	-0.0536771859307389	0.324805002994192	-0.165259726407905	0.868739556576056	NA
Art3	47.0175486745191	0.326915426472117	0.383397389568159	0.852680366030504	0.393836581819131	0.834919905467
Arv1	61.9683565818075	-0.128893290154554	0.235177494617343	-0.548068131962524	0.583645121493623	0.896980598430533
Arvcf	163.812606746965	0.0698688643194687	0.25771163759744	0.27111256973427	0.786304454255615	0.958035229502324
As3mt	58.9407967873921	0.00182260553348827	0.225137964945218	0.00809550505589658	0.993540792057145	0.999799152536572
Asah1	3602.0484066033	-0.0883906767649151	0.0932722691285239	-0.947662982693363	0.343301051536604	0.805919077881303
Asah2	274.468091361261	0.390599448755449	0.179870898776397	2.17155443939275	0.0298892867055765	0.411142141293429
Asap1	3502.23734327432	0.122717726673637	0.0984288785885221	1.24676546592239	0.212483506513022	0.708450162537481
Asap2	72.3253054869361	-0.107364745334744	0.213169365975703	-0.503659354820153	0.614500775088567	0.907696371491129
Asb1	224.917792178021	-0.0201804212860309	0.131521772242533	-0.153437875280581	0.878052978351118	0.976406212390727
Asb13	91.3026004891243	0.0776834403258617	0.202296413938489	0.384007995067488	0.700972521768296	0.933679368705562
Asb2	56.8057232419918	0.342028128399622	0.395386822106423	0.865046858611695	0.387013070284148	0.830990266531224
Asb3	158.073472877966	0.0481314878447715	0.146212373726566	0.329188882021592	0.742012925925487	0.94740631141332
Asb6	399.199131726621	0.159710425823106	0.111483481336037	1.43259273848565	0.151974258151335	0.65283478679366
Asb7	262.144658679593	-0.0262692752365247	0.139861666563881	-0.18782326767518	0.851015195400442	0.971819914777289
Asb8	484.372775933022	-0.235732249090873	0.121788619369752	-1.93558519926387	0.0529185245480016	0.492071694086397
Ascc1	185.712528190105	0.0422994773691806	0.155632202341821	0.271791292114962	0.78578250115767	0.958035229502324
Ascc2	1215.42901167532	0.130358289076523	0.125810727249903	1.03614605786029	0.300134007734443	0.779362172577195
Ascc3	1994.63044274664	-0.0660622289304104	0.101345229260844	-0.651853367072445	0.514495770443699	0.879734328775125
Asf1a	253.466106719176	-0.120990923014508	0.162376162356043	-0.745127371277628	0.456194723768935	0.862404312163108
Asf1b	278.246064544031	-0.416138944492795	0.188639342374487	-2.20600294326025	0.0273837936288986	0.404782314544385
Ash1l	2013.82883804819	0.0703318044255917	0.0985707996568418	0.713515611828659	0.475526756050875	0.867607497891683
Ash2l	650.636669844093	-0.111977469930355	0.0978850213383884	-1.14396940818196	0.252636324162819	0.737741230910258
Asic1	29.0995416595455	0.392693018556735	0.319350037356562	1.22966329300373	0.21882321791253	NA
Asl	619.418238469974	0.0522001319696218	0.0999084659031963	0.522479566648534	0.601336469722703	0.903720194703081
Asna1	850.938599469473	0.0193934295367131	0.145518279010654	0.133271432761332	0.893978719393008	0.979652801545349
Asns	433.121953986131	-0.62135828647688	0.284877016610982	-2.18114572340311	0.0291726398559273	0.410026890890796
Asnsd1	84.1013089129191	-0.0962397179289792	0.212988899194458	-0.451853210627248	0.651374733574423	0.918598849608919
Asph	2353.76742247478	-0.12543967478329	0.122544113880103	-1.02362872284523	0.306010673237787	0.78340054209233
Aspm	700.598693607187	-0.56553565413623	0.210115285393888	-2.69154932291604	0.00711209809358356	0.276943701858705
Aspscr1	398.093910742884	0.00582755444441783	0.103021960897209	0.0565661378764895	0.954890809395611	0.993445164905308
Asrgl1	50.6841445316255	0.0988160787250709	0.27236784533238	0.362803761231368	0.716751481996817	0.939249975080009
Ass1	309.115783291445	0.217117336564682	0.128096795545222	1.69494744689404	0.0900853906255589	0.566817055839805
Aste1	244.718066519638	0.0383398479038044	0.157556164252994	0.243340830779813	0.807741376404009	0.962684050658319
Asun	337.813912182845	0.0943586496734922	0.153914383834439	0.613059334174971	0.539837107773897	0.886471530712798
Asxl1	1469.17284164709	0.0570669557454601	0.148578658090792	0.384085820122215	0.700914840870784	0.933679368705562
Asxl2	1789.65511469183	-0.0416175662052664	0.0795569906525073	-0.523116395730018	0.600893256454549	0.903496499978455
Atad1	1127.55491900005	-0.204903340963575	0.112916597537398	-1.81464324494644	0.0695787521991103	0.531047617396043
Atad2	1553.10144440532	-0.275141783960336	0.185518775078273	-1.48309400945672	0.138049435408549	0.634716818424176
Atad2b	592.261336593329	0.0988506891896016	0.117315850885011	0.842603010964749	0.399450506570501	0.837236972345073
Atad3a	630.058562115017	-0.147702368017373	0.114056775683452	-1.29498986037707	0.195323727350141	0.694621104194787
Atad5	422.527580742483	-0.374968523394787	0.231075876412366	-1.62270735144	0.104651979130887	0.590404525767924
Atat1	53.0745075438517	0.426408442377734	0.277856473781268	1.53463562167498	0.124873357565199	0.621720544082125
Ate1	932.201352742524	0.00966374463845663	0.0878947901626649	0.109946728589626	0.912451623099481	0.983341939934809
Atf1	801.148841160484	-0.141249957963987	0.0916485461554784	-1.54121329676481	0.123264882379771	0.621720544082125
Atf2	937.693666571968	0.00313223176500689	0.100765409289517	0.0310843948046439	0.975202234798224	0.997011087024843
Atf3	5529.2149480244	0.142379576508813	0.161639503922223	0.880846408544553	0.378400957168554	0.824482820830675
Atf4	2879.01789248316	-0.156797746890095	0.0816285657351002	-1.92086857680353	0.0547482782042193	0.496751863519183
Atf5	245.214298308689	0.343135577777451	0.162869503676846	2.10681293938413	0.0351337974452526	0.432974439463456
Atf6	2596.49310255268	-0.101274071880588	0.0899030573812513	-1.12648084314992	0.259962044754966	0.743205527371107
Atf6b	700.030475286261	0.161441712859536	0.128601872316653	1.25536051654071	0.209347915707485	0.707960298111503
Atf7	869.620801586204	0.0401096969210325	0.0963380280122676	0.41634334591035	0.677158778546143	0.92582635805075
Atf7ip	1546.79053545895	0.0383395230420812	0.105732887845897	0.362607357305514	0.716898213494376	0.939249975080009
Atf7ip2	172.115510469072	-0.20478340352721	0.211004641181985	-0.970516109883054	0.331789298813602	0.798482175951353
Atg10	159.630170252492	-0.0341061871279479	0.158008178404598	-0.215850770968418	0.829104071519501	0.966491353753868
Atg101	223.591139252445	0.15479072894941	0.136219267358078	1.13633505708494	0.255816364125089	0.740152700171336
Atg12	796.018221864527	-0.0588831906213639	0.110909542547111	-0.530911851848567	0.595479864417565	0.900739052659247
Atg13	846.586777397534	0.0390728531397619	0.102217506534943	0.382252066835587	0.702274404994302	0.934447521598278
Atg14	325.587339902018	0.0966832841794167	0.156504422223223	0.617767107190856	0.536728868756883	0.885557806427524
Atg16l1	792.699899496281	0.162379130841666	0.0957524885688472	1.69582152138963	0.0899196854696728	0.566817055839805
Atg16l2	350.167571428309	0.0699638498134461	0.169937692977652	0.411702951755658	0.680557161204782	0.926177746349514
Atg2a	2446.96169474463	0.328939127825163	0.131979197065867	2.49235587985127	0.0126898818225552	0.335350937919537
Atg2b	1064.81733625391	0.102294195540252	0.107753749424918	0.949333049533747	0.342451249587569	0.805433544865239
Atg3	831.641146418174	-0.0793279606043419	0.0994386683981135	-0.797757671962619	0.425011129019024	0.847603820508683
Atg4a	192.388045104841	-0.097488524499188	0.128694734144808	-0.757517587234714	0.448739833320394	0.859905792997034
Atg4a-ps	44.8500829173425	-0.137952267520391	0.238672859567142	-0.577997296259748	0.563265944640516	0.893022133018112
Atg4b	566.636161395769	0.178495013965481	0.105072729776294	1.69877583218316	0.0893614289324427	0.566817055839805
Atg4c	485.321800119585	-0.097594217613747	0.121467184432619	-0.803461593924446	0.421707986578111	0.845903674641025
Atg4d	201.146404802871	0.189718248322597	0.134033394564348	1.41545507326172	0.156935111980703	0.656511900482605
Atg5	682.597060129939	-0.0647661174968018	0.0945669177880367	-0.68487076677247	0.493425474464365	0.873509812852559
Atg7	1239.05265874658	0.0947889712812215	0.10492342428646	0.903410958285446	0.366307826205456	0.817527848137409
Atg9a	511.413083576715	0.174275011400101	0.122482051202201	1.42286163310898	0.154776270291739	0.654318694416015
Atg9b	63.6823767883673	0.254318262835767	0.281713749007871	0.902754174162302	0.366656377347378	0.817527848137409
Athl1	318.29551147409	0.130298209609385	0.120845797746808	1.07821878823111	0.280936129241154	0.764799251239183
Atic	1029.94760996781	-0.223484750791805	0.125198525290859	-1.78504299689321	0.0742543429044153	0.540161434909833
Atl1	33.0210185933981	-0.0299525305973897	0.264301754315962	-0.113327021513382	0.909771295164523	NA
Atl2	478.05590511948	-0.118596703292816	0.122651168641723	-0.966943116858915	0.333572470650436	0.799298591837882
Atl3	3394.28858804938	-0.104940531578906	0.0715057347345057	-1.46758203336474	0.142217791276456	0.637646126642362
Atm	656.855548118326	-0.172890245498271	0.1294931601003	-1.33513032938849	0.181833694451008	0.679437485896344
Atmin	666.932097082738	0.154373997434575	0.112107466197531	1.37701798703194	0.168506686812774	0.668309685603534
Atn1	34.9137915381384	0.172611463754476	0.286445019972516	0.602598934242381	0.546775529535517	NA
Atox1	1609.7281673379	0.0430441565587113	0.138874616115535	0.309949778891926	0.756599147430943	0.951646944936644
Atp10a	89.8172815393077	0.0133528738694666	0.272904106142467	0.0489288126082495	0.960976027214179	0.994634993771245
Atp10d	184.480575283017	0.037573495167052	0.187359267512129	0.200542496061048	0.841056325916332	0.970158478108942
Atp11a	1212.43045826416	0.12110785024129	0.10749070664462	1.12668205486537	0.259876932295754	0.743141442340548
Atp11b	1522.89975612157	-0.04749336730255	0.0994137689686867	-0.47773429973779	0.632839328299867	0.913192719512853
Atp11c	716.938811863579	-0.151350616898532	0.0995395660155511	-1.52050710041157	0.128383575571085	0.62561002207495
Atp13a1	1167.09119229593	0.0491355279568113	0.0976402517082654	0.503230246718545	0.614802401493014	0.907696371491129
Atp13a2	5994.60946272349	0.297288455152369	0.136423867094573	2.17915282335664	0.0293203172327438	0.410026890890796
Atp13a3	4195.65396043682	-0.0180854995030503	0.0998039634973426	-0.181210233234192	0.856202562616746	0.972328695426226
Atp1a1	16329.3378065257	-0.0868619761637827	0.136147917903453	-0.637997095375191	0.523475570873422	0.882017382914846
Atp1a3	1333.27301213062	0.293086939464559	0.144003055084446	2.03528278822062	0.0418224270049476	0.458770766672456
Atp1b1	38.790783299039	0.121600394385974	0.490685529696034	0.247817363722347	0.804275719607664	NA
Atp1b3	5556.40288143856	-0.0580797409711425	0.131702139002392	-0.440993148714826	0.65921795699385	0.920451224437284
Atp2a2	4516.62479498941	-0.063158266893925	0.0965698584164214	-0.654016355927319	0.513101268163563	0.879576510212934
Atp2a3	747.695003160443	0.23312958935644	0.187288499168283	1.24476190685349	0.213219282400029	0.708548838668287
Atp2b1	7543.42075189226	0.0812951456914641	0.105042222976678	0.773928267964335	0.438973211931653	0.854910068233516
Atp2b4	1559.34871245847	-0.143473053097978	0.274344601805078	-0.522966561594368	0.600997523084976	0.903496499978455
Atp2c1	2740.29804076484	-0.117870717982525	0.157206738348503	-0.749781588377108	0.453386259357833	0.86135580382557
Atp5a1	13940.1668411565	-0.138022397926759	0.132572075723119	-1.04111214351824	0.29782350424935	0.778115703813901
Atp5b	18691.7362675079	-0.205825283157132	0.139249210085146	-1.4781073661479	0.139379042773099	0.635391542662135
Atp5c1	2138.46962102533	-0.146086678795411	0.122908755616285	-1.18857829178164	0.234605654430332	0.727291589603417
Atp5d	2300.87796558849	-0.0434249511664244	0.135789290984121	-0.319796582276157	0.749122538625021	0.949180279763378
Atp5e	996.245266709353	-0.0968688257974867	0.102598097307359	-0.944158111502708	0.345088857200179	0.805919077881303
Atp5f1	1891.93275169279	-0.194992145179745	0.135255448646052	-1.44165833710712	0.149398782416813	0.648880702035309
Atp5g1	445.285677641847	-0.172938537538052	0.2099973785856	-0.823527125447223	0.410208298285963	0.840729359137326
Atp5g3	3340.91618424119	-0.206582641420942	0.153054709980028	-1.349730703798	0.177102379819444	0.675199262785418
Atp5h	519.231075282177	-0.102234782732314	0.149637649614759	-0.683215641220748	0.494470590483315	0.873929962051394
Atp5j	712.276418397115	-0.170205123818809	0.168491709687241	-1.01016913018895	0.312414266318545	0.78863043246501
Atp5j2	726.849972181222	-0.0867654462129119	0.163077657719429	-0.532049867690581	0.594691457624112	0.900239827230983
Atp5k	144.342543765103	0.0606789292601162	0.275643515517295	0.220135522311276	0.825765610482464	0.96624311344422
Atp5l	62.1647077452845	-0.0744557495240964	0.265883748071625	-0.280031216891222	0.779453555001291	0.956880329516673
Atp5o	1245.82748835655	-0.186746562635139	0.130887524030448	-1.4267712986281	0.153645826662335	0.654138867965916
Atp5s	45.6014887739844	0.0334767618019122	0.278901093067461	0.120030945141598	0.904458634487874	0.980833863200784
Atp5sl	205.977827217615	0.0679332759958972	0.18559700927627	0.3660257040822	0.714345895424112	0.938606260635735
Atp6ap1	7891.08697375921	0.00312758299583318	0.142518982536312	0.0219450275336923	0.982491806634065	0.997201371986595
Atp6ap2	8339.46465380943	-0.168103923234775	0.15947966162979	-1.05407750127415	0.291847435891211	0.773657827830231
Atp6v0a1	3307.89972635999	0.263959943366673	0.141400002464361	1.86676052875743	0.0619350368227612	0.515530892879346
Atp6v0a2	842.332689035867	0.0370041027925624	0.117811365101973	0.314096205918105	0.753447971064791	0.95075334892571
Atp6v0b	5066.50048326117	-0.0811689221340776	0.136243132043946	-0.595765239071987	0.551332068614643	0.889566273115332
Atp6v0c	1812.41561183079	0.0590704774065417	0.130168491056796	0.45380012418495	0.649972694225968	0.917936664348688
Atp6v0d1	2862.61328476225	0.0342987685636676	0.122880813206412	0.279122245928282	0.780151011532533	0.956880329516673
Atp6v0d2	13061.2456492027	-0.178374213360817	0.356625027237257	-0.50017301012962	0.616953260985892	0.907739200901908
Atp6v0e	3398.4033463078	-0.139295062061969	0.15982052660117	-0.871571787581318	0.383442027184553	0.827254886825355
Atp6v1a	24928.9373585266	-0.189645599432289	0.184279888772141	-1.02911717982846	0.303424614087637	0.782074627805898
Atp6v1b2	32338.5224744958	-0.0954479014043989	0.201675837175231	-0.473273857400512	0.636017810798853	0.91467894227117
Atp6v1c1	6757.72693857963	-0.139143115205788	0.169796008652044	-0.819472237954243	0.412517035011804	0.842138744166228
Atp6v1d	4417.68429575387	-0.155389909874032	0.191985353376177	-0.809384190728135	0.418294192868766	0.845649167333018
Atp6v1e1	6420.4446523423	-0.0556476274352927	0.163741604630109	-0.33985026323029	0.733969293714557	0.945632833605951
Atp6v1f	2049.82469420268	-0.0573870009027286	0.149282026559658	-0.384420028487453	0.700667158259096	0.933679368705562
Atp6v1g1	2304.32584797572	-0.159098000568468	0.182198178777892	-0.873214000467127	0.38254644510808	0.826622177864584
Atp6v1g2	30.9730040321983	0.500608352818185	0.32472022623737	1.54166051994631	0.12315611053241	NA
Atp6v1h	5451.94929978277	-0.199602598961238	0.15542628604017	-1.28422678072389	0.199062617307879	0.696687392374735
Atp7a	1180.50723878502	0.2330519424623	0.125278386124485	1.86027254717924	0.0628469755447486	0.515707852926097
Atp8a1	1102.70997445874	0.222026747856686	0.122074628191003	1.81877881707978	0.0689451813931104	0.529513314391284
Atp8b1	72.8283836086657	-0.129158070863684	0.27827112017998	-0.464144718935069	0.642544064457809	0.914847478476245
Atp8b2	237.045255475352	0.334969954515208	0.17660951481349	1.8966699210343	0.0578715159493409	0.5044635638004
Atp8b4	1256.77198893551	-0.137388965157193	0.166957725144137	-0.822896724536605	0.410566725527994	0.84096692886838
Atp9b	2291.02214262659	-0.014554071217878	0.0974209110304001	-0.149393708844875	0.881242975640223	0.977390567068734
Atpaf1	114.803019553128	0.165339381573773	0.167013808314149	0.989974321540968	0.322186670316425	0.79328595830091
Atpaf2	337.371856350254	-0.166037406312058	0.12717266160774	-1.30560612802298	0.191686535323698	0.689427547642944
Atpif1	278.093763953982	-0.115389489654543	0.204925501219248	-0.563080187521849	0.573380281996321	0.894282609432778
Atr	701.449513434942	-0.292918808292539	0.164431447396048	-1.78140381862003	0.0748465048624844	0.540161434909833
Atraid	264.884661788261	0.00228177778564769	0.151845213921444	0.0150269983934308	0.988010641209249	0.998893265342896
Atrn	900.830631207195	0.0585696758678501	0.118478302754666	0.494349383018517	0.621059454788942	0.90951011613642
Atrnl1	1542.18772187284	0.14227165039395	0.121796347925065	1.16811097227219	0.242762005009527	0.732246478540542
Atrx	3090.94775121659	0.0522166009413957	0.104639840792071	0.499012618388393	0.617770494644867	0.907856419915079
Atxn1	1392.9094891749	0.206524385052319	0.139478169777263	1.48069325387711	0.138688332476521	0.634945077189728
Atxn10	1253.81865613368	-0.183758247912887	0.123254908452636	-1.49087975659404	0.135993067072591	0.63327979328788
Atxn1l	1230.74603164199	-0.0832843193975224	0.0888838709405193	-0.937001488754421	0.348757792120742	0.808493274008833
Atxn2	1393.86592958197	0.135852117944713	0.104235166442101	1.30332326969683	0.192464420023964	0.690460281641661
Atxn2l	2205.58585366735	0.246268671948566	0.0938072185528612	2.62526355378282	0.00865819203323327	0.289176492161407
Atxn3	1347.86469346689	-0.035254070482594	0.0963769549124274	-0.365793570824348	0.714519117649168	0.938606260635735
Atxn7	528.123360640754	0.0808903587184763	0.122731308120126	0.659084955236551	0.509841216099812	0.879340012178426
Atxn7l1	951.032755456137	0.170433878814554	0.132788426794684	1.28349949561551	0.199317136171767	0.697110066404237
Atxn7l1os1	82.4776899537773	0.220950081469146	0.216333384392601	1.02134065941559	0.307093069106792	0.784795108805723
Atxn7l1os2	32.3615175728688	0.527912099270945	0.310537791192029	1.69999309019525	0.0891322252462425	NA
Atxn7l2	52.852703517258	0.316624647444199	0.217941705311814	1.45279512698681	0.146280645355658	0.644334111469872
Atxn7l3	867.673474268033	0.110845032900626	0.0992889807419915	1.11638806312922	0.264256060830573	0.747369861375514
Atxn7l3b	1036.76977940937	-0.0117941057840106	0.0936364871193603	-0.125956303433046	0.899766513825447	0.979979945483724
AU019823	299.531390839569	-0.0807830882471108	0.157085747927418	-0.51426109187472	0.607069460420585	0.90604976111964
AU020206	352.408778961871	-0.180309910132744	0.146542721522838	-1.2304255595843	0.218537786902941	0.712647888174613
AU022252	195.278210813271	0.0202117090785027	0.138031223616537	0.146428529349653	0.883583106868092	0.978064117081387
AU040320	1038.77280232065	0.113237241832877	0.114440349797135	0.98948702999955	0.322424912523627	0.793315327018361
AU040972	45.1011874400592	-0.197068692598655	0.325034000125754	-0.606301779267431	0.544314377326925	0.888009770835405
AU041133	42.921978575906	-0.187600094006525	0.294261741198057	-0.637527981866519	0.523780989345554	0.882017382914846
Auh	424.29713984433	-0.0672936423955694	0.131864380892305	-0.510324637633031	0.609824044773054	0.90604976111964
Aunip	38.6405188160632	-0.909827970765256	0.375295161815532	-2.42429976012444	0.0153379392500084	NA
Aup1	1209.73325914922	0.118787556283169	0.0937607719019196	1.26692169735365	0.205183289629229	0.704313469024382
Aurka	323.334669788458	-0.448850152138819	0.197576576239035	-2.27177816663745	0.023099912212554	0.393413846318117
Aurkaip1	450.346803438797	-0.12480036204388	0.102965569934459	-1.21205915844801	0.225489736061779	0.719055647441556
Aurkb	317.761745814465	-0.39830355974415	0.222599657040963	-1.78932692457318	0.0735621803500937	0.540038490029056
AV356131	32.8128063150897	0.0167941173711525	0.374133633578234	0.0448880182477384	0.964196567272066	NA
Aven	164.041602280228	-0.299222116262825	0.15075382849461	-1.98483925251373	0.0471623587884754	0.474658745512801
Avl9	1347.67476148409	0.0176486334385735	0.0988127590648942	0.178606827757769	0.858246432926384	0.972328695426226
Avpi1	205.244423823123	-0.146781911978152	0.167615064712635	-0.875708351333455	0.381188604114226	0.825673227217677
AW011738	241.446331990382	0.232428697947822	0.300683923002713	0.773000084695996	0.439522330515345	0.855214596823457
AW112010	51.8556955232716	0.572824554077428	0.34188725653043	1.67547793354633	0.0938404970445854	0.576538593303557
AW209491	103.020835119021	-0.398475352365081	0.185727675673373	-2.1454818239682	0.0319143431396961	0.41937994371931
AW549877	1238.36884897599	0.0652988201424504	0.114932061825656	0.568151472315047	0.56993211949289	0.894189389398781
AW554918	215.174048626037	-0.091879717650183	0.19639657867426	-0.467827485949097	0.63990796312775	0.914826810632399
Axin1	852.146115939944	0.128972372864279	0.112329402729748	1.1481621884394	0.250901615416508	0.73701219329054
Axl	456.729061525604	0.189929706866348	0.237781318350623	0.798757901519769	0.424430805525813	0.847080480584746
Azi2	1038.24732984072	0.0232572755511922	0.103105196210704	0.225568413677851	0.821537109929424	0.964794379221003
Azin1	3726.1700922175	-0.202428867558089	0.0905290204028912	-2.23606603338022	0.0253474460065988	0.402026580321932
Azin2	131.838544158857	-0.0682690725552999	0.18734756312378	-0.364397974636022	0.715560847671912	0.938846881498248
B130006D01Rik	71.4986071665886	0.247359416339599	0.257924217856901	0.959039125503279	0.337539035231627	0.801862150770132
B230118H07Rik	40.4937546812352	-0.159315779865504	0.254088772359746	-0.627008341950429	0.530653767017822	0.882117850050762
B230216N24Rik	92.7823577777427	-0.281642064913126	0.186192500294536	-1.51263914748231	0.130371344559177	0.629191395564054
B230217O12Rik	30.5566166627205	0.189185704503722	0.382795555442977	0.494221267237007	0.621149921690361	NA
B230219D22Rik	1057.49791029719	-0.0131709906334551	0.129262074112824	-0.10189369715636	0.918841052865372	0.984789357668223
B230303O12Rik	45.7842756832367	0.481181591921257	0.280175405056568	1.71742980731698	0.0859006693566898	0.561338788231935
B230307C23Rik	58.4067218787792	-0.414961627787002	0.216867403949915	-1.91343475427426	0.0556924187432704	0.499929376379778
B230319C09Rik	113.267411373901	0.382155419401226	0.255956609984114	1.49304766704382	0.135424709877883	0.632580143816374
B230354K17Rik	185.865018878961	0.183445387995199	0.174255555265929	1.05273767436135	0.292461236784529	0.773764822328299
B230369F24Rik	35.8862006684865	0.14766539493237	0.320719521071122	0.460419105264329	0.645215423884908	NA
B2m	14468.937437105	0.0221118149481623	0.188407877651324	0.117361414096938	0.906573659802167	0.981442785873656
B330016D10Rik	36.227678785949	0.204362570354474	0.34342941515507	0.595064258727508	0.551800518496369	NA
B3galnt1	88.2946858558176	-0.476832073531475	0.229380417243521	-2.07878283273523	0.0376373154845795	0.445224651136448
B3galnt2	166.40665525389	0.0693838481942889	0.148459064906902	0.467360132153594	0.640242241206616	0.914847478476245
B3galt2	171.826811524654	0.119786888154905	0.167121039565025	0.716767251249041	0.473517721859559	0.867506393064361
B3galt4	63.4448183710158	0.176072555471514	0.211949479080408	0.830728889900772	0.406126802019281	0.839213155532175
B3galt6	113.214668470897	-0.360944314359293	0.167960131828633	-2.14898803918277	0.0316353480953734	0.418050171841902
B3gat3	492.809986798913	0.067448524585633	0.126643543827818	0.532585574810942	0.594320489865396	0.900023095231192
B3glct	111.771243013632	-0.302024865622036	0.199814649816539	-1.51152513541596	0.130654709543686	0.629191395564054
B3gnt2	52.0135275811202	-0.121495084278291	0.262983236630637	-0.461987942025871	0.644089967476174	0.915273834774871
B3gnt3	275.437436198225	0.180501221818874	0.166730769750116	1.08259094640657	0.278990027643641	0.762654243002785
B3gnt5	30.3479730772439	0.296537103384563	0.442535224473187	0.670087005475265	0.502802328054816	NA
B3gnt8	293.833176029394	0.17029933340463	0.138106925166352	1.23309771178746	0.217539311086213	0.712216068258925
B3gntl1	95.530632632517	0.0521194551106768	0.188922559439278	0.27587735030357	0.782642270913542	0.957488927876767
B430306N03Rik	523.910679017582	0.294866105786609	0.181129145709448	1.62793295707146	0.103539102285899	0.589108053034729
B4galnt1	710.947879718257	0.0957043890009556	0.125054876140042	0.765299138705966	0.444093436807819	0.858001549548994
B4galt1	1888.77114790792	0.101248741231562	0.119783789537285	0.845262465168934	0.397964312934455	0.837010409305704
B4galt2	33.6426238364856	0.095943689389444	0.29915810685972	0.320712316295121	0.748428412895848	NA
B4galt3	143.177127548359	0.0277079010341528	0.171405466822399	0.161651209543172	0.871580528218892	0.975377275089333
B4galt4	62.3712027590673	-0.119938405024697	0.219861013514142	-0.545519203735419	0.58539647648252	0.897981679273626
B4galt5	1853.38546508895	0.174718162778407	0.116967885829043	1.4937276290842	0.13524682398189	0.632580143816374
B4galt6	1345.48405662757	0.211369550134033	0.161802522565175	1.3063427367079	0.191436029830602	0.688855877833069
B4galt7	511.957905295255	-0.0582595938582995	0.164565408541744	-0.354020898890918	0.723323221147406	0.941352095024851
B4gat1	279.440200915508	0.00609102638046902	0.122815640571096	0.0495948753118543	0.960445230517079	0.994504013733341
B930036N10Rik	260.488450351496	-0.278008211991794	0.245923731501676	-1.13046516614806	0.258280268419458	0.741640414397366
B9d2	128.582845522757	0.0489146407676831	0.167448800585715	0.292116996936293	0.770197171510182	0.954751057767576
Babam1	593.258648883038	-0.119236329633692	0.131617227405977	-0.905932543814373	0.364971557752866	0.817152979607993
Bace1	468.914215592722	0.166006298282242	0.103970725626936	1.59666384245407	0.110340659568074	0.597963796984262
Bach1	3360.92888563999	0.0879364974278635	0.115808134987126	0.759329190800277	0.447655659792114	0.859561794183907
Bach2	46.5615543763387	-0.0335358472904539	0.302573527525795	-0.110835364761363	0.911746901084989	0.983290815867665
Bad	308.716879931424	0.0240313330697181	0.134420549938632	0.178777226255132	0.858112627992512	0.972328695426226
Bag1	1241.42611533	-0.187419190309359	0.091787616437521	-2.04187882400164	0.0411635528022687	0.455141409855681
Bag2	49.9062987517634	-0.456739413569525	0.364280267176622	-1.25381321670129	0.209909904132363	0.708260052264379
Bag3	1097.88134168603	0.153327905244611	0.212554682686274	0.721357456381799	0.47068961480274	0.866597164280391
Bag4	205.027980001466	-0.0197064840114511	0.167487881707762	-0.117659163221346	0.906337724982912	0.981442785873656
Bag5	291.540176154259	-0.097175712492105	0.132752382337561	-0.732007296449172	0.464164114311575	0.866006177701102
Bag6	3344.03501011033	0.108965624036002	0.108422652774566	1.00500791345297	0.314893039375992	0.788873755889249
Bahcc1	154.862974404484	-0.324039200132985	0.259509753233316	-1.24865904304434	0.211789807080813	0.708260052264379
Bahd1	962.9822671895	0.179914650120066	0.0943129420354073	1.90763479791057	0.056438434311988	0.502165135271739
Baiap2	2189.63497366278	0.249646603926744	0.161115066760135	1.54949260144871	0.121263348687541	0.619007093881752
Baiap2l1	189.756565969341	0.120381366628698	0.191784519913252	0.627690736891325	0.530206554686604	0.882040462133377
Bak1	664.858300812434	-0.00569683456744143	0.133463366104642	-0.0426846312491087	0.965952930890274	0.995246688432371
Bambi	65.955034046575	0.334128781675552	0.270021870073391	1.23741377535359	0.215933507264336	0.711406030596784
Banf1	626.826805889694	-0.349017715857416	0.151726013353053	-2.30031560273902	0.0214303463501688	0.389841285312667
Bank1	136.944315970785	-0.137972113091525	0.332805172072476	-0.414573223824413	0.678454353097052	0.926177746349514
Banp	167.36362078189	0.22062754882513	0.156604137359499	1.4088232440415	0.158887440229473	0.659710249269491
Bap1	1044.39195977472	0.0452126699134609	0.0864439581026881	0.523028687091723	0.600954290180638	0.903496499978455
Bard1	221.200926077204	-0.4724195690227	0.253289333596646	-1.86513803133539	0.0621620589345324	0.515707852926097
Basp1	2211.78582654099	-0.0479334999307058	0.104884055146998	-0.457014174971835	0.64766085701184	0.916806798401886
Batf	37.2483504342482	-0.214270435569323	0.32420926392074	-0.66090164413595	0.508675391613757	NA
Batf2	40.3255100302417	0.357639052168575	0.345584023582912	1.03488306103008	0.300723526211657	0.779836255264098
Bax	541.504048012353	0.0812468550290447	0.158619085331239	0.512213614517949	0.608501515750577	0.90604976111964
Baz1a	1257.43985075883	0.0518229772110713	0.128550256537352	0.403133985158663	0.686849660481409	0.927988838153538
Baz1b	2199.70564412142	-0.0230371606888281	0.116275859804743	-0.198125051300532	0.842947225214629	0.970158478108942
Baz2a	1630.31131421422	0.337341724341263	0.118524951362267	2.84616631742114	0.00442490772105748	0.238401960080429
Baz2b	2284.80421376725	-0.00575532172338879	0.0814382606681803	-0.0706709803987442	0.94365961735854	0.991279447075315
Bbc3	624.078294603976	0.0692412007005772	0.18285611900062	0.378664936557811	0.704936694237383	0.935900475916548
Bbip1	218.919295391087	-0.0842110227626973	0.126771771719357	-0.664272665914308	0.50651581236718	0.8776595073457
Bbs10	315.953773230941	0.328611655119377	0.249541014237307	1.31686430835324	0.187884112105919	0.68554337863637
Bbs2	65.8473339859102	-0.121496163422587	0.247669769282955	-0.490557098568545	0.623739735926303	0.910491020927891
Bbs4	73.9169746091642	-0.194451266930548	0.235711047845103	-0.824956100735384	0.409396514211718	0.840273053324934
Bbs5	29.3042662712452	-0.0194051170785431	0.312270715926737	-0.0621419687752464	0.950449775311911	NA
Bbs7	56.0384048438228	0.155515223032446	0.271059491798248	0.573730962161612	0.566149872849556	0.893199739973878
Bbs9	257.823937449187	-0.0987109230958598	0.15328789268608	-0.643957727946664	0.51960284598171	0.882017382914846
Bbx	1885.27983098968	0.0578918509375695	0.12356401656097	0.468517069522452	0.639414867123639	0.914826810632399
BC002059	49.7619971566012	-0.0816737283378986	0.240239166001397	-0.33996841438179	0.733880314373733	0.945632833605951
BC002163	273.826799468429	-0.252067042234172	0.217618952924302	-1.15829544645338	0.246743488995954	0.735864257743929
BC003331	568.065893003192	-0.208648926541925	0.142043007020907	-1.46891375308053	0.141856183837672	0.637384892732345
BC003965	243.985686375693	-0.139841522225654	0.125174259988438	-1.11717474693735	0.263919615826853	0.747217931483927
BC004004	476.097358468669	0.0390481135426935	0.139853777127329	0.279206713931955	0.780086191477187	0.956880329516673
BC005537	8569.85827792883	0.0934243734370858	0.101044954432503	0.924582270948446	0.355183238621959	0.813524043939339
BC005561	152.869708324981	0.0384073451290042	0.201375181484565	0.190725316028818	0.848740803439563	0.971715620154356
BC005624	451.107992516506	-0.00642997369619075	0.136590081889982	-0.0470749677225457	0.962453478076944	0.995118160358785
BC017158	184.727634595784	0.0441277507179833	0.150742053515818	0.292736828832923	0.76972331706833	0.954671589241683
BC017643	573.326634642857	0.0680829575068926	0.109544831781512	0.621507709671641	0.534265623430691	0.884397237140872
BC022687	55.2213024478697	0.115139269313306	0.286259312972793	0.402220169250004	0.687521999928289	0.928339340498904
BC024978	144.391450406841	0.322081110077521	0.17072317498243	1.88656935480885	0.0592182718499514	0.509371680868994
BC026585	192.964283589054	-0.00417036464243286	0.167325090455428	-0.0249237256115141	0.980115802809226	0.997201371986595
BC028528	48.7701790958811	0.0354962068015733	0.323902276432356	0.109589247697018	0.912735138388133	0.983363905829202
BC028777	33.4497288045853	0.00364813866029632	0.414373772192162	0.00880398062115892	0.992975530533412	NA
BC029214	71.724908033533	0.171106082423983	0.215327959806898	0.794630119457907	0.426828692558557	0.848665114428802
BC029722	114.133457326606	0.247374225957752	0.209044747239313	1.18335537833227	0.236668333837506	0.727291589603417
BC030336	153.028941700335	-0.0472431339975506	0.167551796198218	-0.281961369973384	0.777973131253493	0.95649911050407
BC030867	102.912520805955	-0.158894846478436	0.231752358408004	-0.685623428257414	0.492950603831991	0.873509812852559
BC031181	743.2574526473	-0.14678558194828	0.155446557369196	-0.944283259999473	0.345024917957332	0.805919077881303
BC037032	46.3520593443142	0.0867420507951565	0.360394254080184	0.240686553165349	0.809798061664926	0.962684050658319
BC037034	588.79579467094	0.370412592458538	0.11132591418157	3.32728094066584	0.000876979099450935	0.135376684146432
BC046401	27.5028300127192	0.101163320643716	0.328299203825716	0.308143667315808	0.757973015019408	NA
BC048403	163.010953219508	-0.190545735435728	0.144389672178144	-1.31966319031903	0.186947495009517	0.684973310153883
BC049715	50.7077455231211	-0.0710371664384953	0.311549036194609	-0.228012794731042	0.81963629374435	0.964228820915787
BC052040	75.5326455539529	-0.113025073800462	0.243296254289813	-0.464557393743625	0.642248449560589	0.914847478476245
BC055324	93.4728891486608	-0.217054198019782	0.266537026892541	-0.814349137717708	0.415444967440975	0.843844821626743
BC065397	26.9221998566492	-0.374039863142052	0.336196013018141	-1.11256483913707	0.265895368431919	NA
BC068281	40.3318361041491	-0.0605260096550984	0.292397260467419	-0.206999236444086	0.836010454814677	0.969091329964221
BC100451	137.954347550197	0.227280515197656	0.290202850785157	0.783178092781439	0.433522537616396	0.852645950315385
Bcam	95.3371445043079	0.0997028901866245	0.205783024980604	0.484504930355758	0.628027566147304	0.912181672588409
Bcap29	625.653118724103	-0.371779889592945	0.14174796188897	-2.62282352873727	0.00872044283636637	0.289176492161407
Bcap31	1376.47284748868	-0.0672030813181915	0.113723181642318	-0.59093564168437	0.554563543819318	0.890276815948786
Bcar1	243.757685356838	-0.0878432410210534	0.220045948197278	-0.399204083241284	0.689742834797372	0.92956473233124
Bcar3	1556.13233203502	-0.257556937641446	0.196935385618465	-1.30782457826257	0.190932815715684	0.688808316436252
Bcas2	503.570299907512	-0.0608929431269571	0.105429420288564	-0.577570690992048	0.563553999407363	0.893022133018112
Bcas3	633.433840629756	0.140838001686078	0.119380153262224	1.17974385052699	0.238102107673845	0.728228394489874
Bcas3os1	61.1757371753016	0.0569452979707586	0.23064794364834	0.246892719137271	0.804991251224862	0.961925373645325
Bcat2	1074.13343035212	0.0525806253175682	0.120640721014755	0.435844753540036	0.662949370867516	0.921548279191846
Bccip	207.114720978921	-0.417629614005272	0.160134235662322	-2.60799704871315	0.0091073739603022	0.289176492161407
Bcdin3d	32.532268933941	0.0822821797583838	0.280532162938174	0.293307472828055	0.769287142223331	NA
Bckdha	184.969270210913	0.215356879875645	0.149903200681069	1.43663963742732	0.150820414747324	0.650773344011662
Bckdhb	86.868868530125	-0.020616683625284	0.184367372754351	-0.111823926963224	0.91096301553444	0.983123429220588
Bckdk	688.461925891739	-0.146749832489664	0.110931457199187	-1.32288744955511	0.185872809612857	0.684555036757474
Bcl10	1026.54078589081	0.0661449314397587	0.136609139776803	0.484191113038473	0.628250243342077	0.912181672588409
Bcl2	261.758653528257	0.111670097445159	0.173664466060457	0.643022144819678	0.520209730775503	0.882017382914846
Bcl2a1a	105.903710222458	-0.0949239649365278	0.226814851756303	-0.418508595012628	0.675575303735837	0.92582635805075
Bcl2a1b	65.4973877755388	-0.0585534164707468	0.288333714263046	-0.203075164555084	0.839076283084729	0.969637436229238
Bcl2a1d	80.5113674910493	0.483116301637114	0.210717285669276	2.29272268813946	0.021863975477492	0.389841285312667
Bcl2l1	902.497800768644	0.243408719693911	0.116128004407235	2.09603808260005	0.036078812828516	0.434607363992303
Bcl2l11	3360.16298770097	0.10353231209615	0.140709633534997	0.735786950012915	0.461860364300985	0.864020028102838
Bcl2l13	1021.63094242969	-0.0839082569072945	0.116721927446273	-0.718873126439052	0.472219095844586	0.867247124735959
Bcl2l2	302.185755456113	0.217171360002981	0.118606715682063	1.83102077107614	0.067097442865924	0.524608173014378
Bcl3	404.195837577305	0.00243601707156397	0.15422335501604	0.0157953837232409	0.987397631233656	0.998893265342896
Bcl6	467.695855094961	0.180606744218893	0.129270270631907	1.39712513430999	0.162375944777974	0.663440907774329
Bcl7a	77.1773568112071	-0.436940692428633	0.28118378221241	-1.55393276593229	0.120200454982542	0.616501944140229
Bcl7b	371.686450769986	0.0261759156766831	0.116082260433809	0.225494537915281	0.82159457407637	0.964794379221003
Bcl7c	93.728087843673	0.1017872915856	0.199513562257458	0.510177305411703	0.609927250120242	0.90604976111964
Bcl9	184.218352295515	0.402871640152715	0.176383023214883	2.28407265512117	0.0223672613387039	0.389841285312667
Bcl9l	230.117934258131	0.31922919718061	0.131533232720803	2.42698510921736	0.0152248807347561	0.342690730796263
Bclaf1	2328.1483014621	-0.092348981680847	0.0854302673442349	-1.08098668717416	0.27970303556848	0.763398889610585
Bcor	1025.40295230102	0.125145535933684	0.107938492582414	1.15941526456034	0.246286957658737	0.735324763004789
Bcorl1	132.396968328665	0.34339724205846	0.174170749922351	1.97161258254646	0.0486538497077279	0.477395762074254
Bcr	394.722491891633	0.121492877144642	0.251576578603747	0.482926025224323	0.629148262110584	0.912181672588409
Bcs1l	114.103404160996	0.127526764867353	0.164799435299955	0.773830108308557	0.439031265109037	0.854910068233516
Bdh1	1315.98606066592	-0.0521899422350999	0.278595626867713	-0.187332237845505	0.851400148231423	0.971819914777289
Bdh2	260.846263873129	-0.0715549026174129	0.299255108899889	-0.239110045206782	0.811020252727674	0.962684050658319
Bdp1	1090.38282780171	-0.0467438775181974	0.0833867027061663	-0.560567524571766	0.575092395495469	0.894469677173
BE692007	82.3308037150455	0.202345623274994	0.281132009243675	0.719753057716058	0.471677052061011	0.86689956149097
Becn1	652.391997193415	0.0799183330635188	0.099244782274553	0.805264833393769	0.420666870528557	0.845903674641025
Bend3	304.359475734686	0.0172642048574241	0.167649763865407	0.102977805988944	0.917980585548546	0.98458017121548
Bend4	288.806854734482	-0.0111771251599222	0.155613573220859	-0.0718261584036677	0.942740255184415	0.991279447075315
Best1	225.941256385252	0.290144183475135	0.203021688576367	1.42912900345618	0.152967158722209	0.653334016663898
Bet1	332.444654007066	-0.229238813159514	0.144457618946342	-1.58689319976029	0.112536835344422	0.600976791629127
Bet1l	208.819593205764	0.10089131457048	0.146341351507202	0.689424510101744	0.49055616367674	0.873509812852559
Bfar	497.874559484946	0.0374493365354583	0.150364105173372	0.249057688949625	0.803316157647111	0.961431556227882
Bhlha15	47.1111540760583	0.286682687344599	0.236346136406419	1.21297809942457	0.225138193831978	0.718514542673784
Bhlhe40	7480.02869162592	-0.0828389116518694	0.133648428199005	-0.61982705496933	0.53537165450245	0.884683652674293
Bhlhe41	986.417753636455	0.0806633998399646	0.171145707340924	0.471314186567835	0.637416386298075	0.914785417132227
Bicd2	1230.53400755392	-0.00667795062530643	0.0892761824385508	-0.0748010325139395	0.940373020293816	0.990686525531572
Bid	375.70659013023	-0.110909204974561	0.189524752262869	-0.585196411816075	0.558415657307566	0.891434449301897
Bin1	1082.20291692751	0.197942323917384	0.179441970957711	1.10309936332584	0.269984017309071	0.753146753863126
Bin2	424.608824720162	0.216259688317783	0.170206994648477	1.27056874933029	0.20388211043215	0.702890960681574
Bin3	634.364597768548	0.00454981601859663	0.135445852467168	0.033591401550664	0.973202978968927	0.996640797379354
Birc2	954.118213820443	-0.0242787903249026	0.1298498745961	-0.186975847303836	0.851679570035062	0.971819914777289
Birc3	2890.95019077787	-0.0342174359148133	0.119978443838921	-0.285196530476361	0.775493578315301	0.955999493206543
Birc5	269.014046578127	-0.593645202300193	0.242690418669448	-2.44610069715507	0.0144410661041656	0.342690730796263
Birc6	7521.40032277238	0.0581412882578692	0.0919896415040004	0.632041687599584	0.527359637204588	0.882017382914846
Bivm	219.105740300702	-0.115260880751313	0.133474590582663	-0.863541744148895	0.387839678245175	0.831445777941773
Blcap	719.950693395498	0.0829910752309143	0.131972203238444	0.628852691660896	0.529445500201635	0.882017382914846
Blm	238.289952094504	-0.205162408399597	0.238550553045423	-0.860037446069266	0.389768401196038	0.833014331579757
Blmh	386.753884430074	-0.19563792080597	0.120895603760911	-1.61823850264128	0.105611208154761	0.590859927892198
Blnk	773.998804917903	0.00369326395431502	0.137603450475908	0.0268399080222312	0.978587422674328	0.997201371986595
Bloc1s2	64.3043029448442	-0.0768176629459398	0.223016484320179	-0.344448362999278	0.730509123033069	0.944271810391517
Bloc1s2-ps	58.0452180764322	-0.334072219544195	0.237526079893433	-1.40646542768726	0.159585963702206	0.659987327287592
Bloc1s3	201.279021468118	0.16528956860044	0.168403614325313	0.981508438893375	0.326342074952284	0.796731743441693
Bloc1s4	147.382115062908	0.0145967199765609	0.162332891328124	0.089918437706235	0.928352029332362	0.988191884122187
Bloc1s5	157.808931529661	-0.247703551008	0.167602784963421	-1.47792025688631	0.139429123636566	0.635391542662135
Bloc1s6	481.937167002437	0.022132581253143	0.118937127506206	0.186086394696122	0.852377011027863	0.971819914777289
Blvra	760.263188371669	0.0766228713537839	0.136063503681461	0.563140513661667	0.573339205852128	0.894282609432778
Blvrb	1796.84453723487	0.208637661581247	0.136893424336653	1.52408826495681	0.127486663750484	0.624421250179541
Blzf1	233.780996021298	-0.0380313398294767	0.1389915893664	-0.273623317805374	0.784374112619429	0.957971957200645
Bmf	433.155374825985	0.000264749217901394	0.162817853330045	0.00162604537823457	0.998702604069266	0.999799152536572
Bmi1	477.602758140825	-0.150453147931578	0.119666078500273	-1.25727482522322	0.208654136666048	0.707026152630837
Bmp2	485.839875356496	0.135749061824794	0.205822245712864	0.659545139810463	0.509545769492955	0.879340012178426
Bmp2k	1205.66328913616	0.231572402569656	0.125419072008275	1.84638906078318	0.0648357344376433	0.517952522285255
Bmpr1a	103.222046400519	-0.183861398166422	0.24571808401624	-0.74826156529151	0.454302402613809	0.86135580382557
Bmpr2	2170.17523084673	0.152412491828349	0.125541323095201	1.21404242101839	0.224731525490317	0.718297840683105
Bms1	703.802931361639	-0.101616172361012	0.103233400271349	-0.984334257071008	0.324951191126459	0.794809423941791
Bmt2	1168.19475249361	-0.00500921666296328	0.0951284740431208	-0.0526573847982955	0.958004893892996	0.994154439442627
Bnip1	208.469206270991	0.146577225000302	0.144061207948878	1.01746491708106	0.308932313560294	0.785608260028903
Bnip2	1795.28708512441	0.00995882929220752	0.100343804613895	0.099247076892563	0.9209420973841	0.985283046575544
Bnip3	117.548767633746	0.075563909058234	0.188442735282707	0.400991361884399	0.688426483693386	0.928952539983801
Bnip3l	977.086623572502	0.0875740945683006	0.131877686179297	0.664055437318162	0.506654830161281	0.8776595073457
Bnip3l-ps	204.798303701007	0.245642892710379	0.165423844902942	1.48493037901823	0.137562267640282	0.634122524814463
Boc	130.680069677107	-0.0118748548974242	0.237843298391408	-0.0499272208960132	0.960180385210841	0.994504013733341
Bod1	226.486142140745	0.0394905152456753	0.134726067576251	0.293117107595565	0.769432640817664	0.954671589241683
Bod1l	1086.34707972376	0.0884102418331732	0.109655680371821	0.80625318755391	0.420096876470225	0.845903674641025
Bola1	51.05046358058	-0.224218352505272	0.325417012224532	-0.689018533396668	0.490811604627903	0.873509812852559
Bola2	247.986097838714	-0.00720546104572394	0.166234747940904	-0.0433450956251666	0.965426443870393	0.995246688432371
Bola3	259.815058078988	-0.122824155739102	0.157479882990537	-0.779935528314325	0.435428824808382	0.852963904557338
Bop1	678.824645441448	-0.0440951992138092	0.144248491640444	-0.305689152880166	0.759841332969919	0.951812312476317
Bora	188.581758288933	-0.230071516934058	0.238433179435198	-0.964930793101248	0.334579476767443	0.800034403494957
Borcs5	94.8282273564226	-0.112481142714926	0.181172539562782	-0.620850946762535	0.534697698714799	0.884683652674293
Borcs6	201.414370873881	0.265445363615054	0.178276073773142	1.48895675116132	0.136498757765935	0.63327979328788
Borcs7	99.0063318668471	0.18341270986525	0.229707782183999	0.798461019132271	0.424603005453085	0.847275997245019
Borcs8	143.354328154183	0.166622632410866	0.154518087189286	1.07833740011778	0.280883212300349	0.764799251239183
Bpgm	78.8001998750393	-0.0199271570329636	0.20721987767823	-0.0961643123055326	0.923390074071201	0.985675661740449
Bphl	170.576883272662	0.0185040220773244	0.154847415060469	0.119498424110589	0.904880488468854	0.980958556210125
Bpnt1	415.25924945535	-0.282820403145423	0.139559238710785	-2.02652583775929	0.0427109277348135	0.461107685717789
Bptf	2115.86346414729	0.145291967264976	0.0889026951192472	1.6342807950883	0.102199904322729	0.589033494848096
Braf	1293.35030835715	0.155105267318036	0.143349074664951	1.08201094203477	0.279247665933495	0.762951549243416
Brap	1458.03009905413	0.0258800782724863	0.119597935792793	0.21639234908974	0.828681929542538	0.966491353753868
Brat1	259.459801293668	0.0968509401136359	0.117053509957955	0.827407398107278	0.408006188770248	0.839285270483232
Brca1	779.409892559686	-0.361473567216828	0.197147277849373	-1.83352045820793	0.066725209005368	0.523612460178385
Brca2	251.849861189712	-0.458145984765471	0.206031516026545	-2.22366943466282	0.0261706931436895	0.403970473495378
Brcc3	381.753350692227	-0.231850088781852	0.130510713944352	-1.77648318497982	0.0756533110132656	0.540161434909833
Brd1	1455.14751699038	0.199480975459504	0.110720776226828	1.80165802893974	0.071599225332356	0.53476094383391
Brd2	7306.99812107764	0.171749968768508	0.157921485481747	1.08756555983865	0.27678694168036	0.760933776110926
Brd3	486.559821147334	-0.110683192512649	0.124502685712614	-0.889002449056691	0.374001763602614	0.820478049968865
Brd4	1766.24277832624	0.243937729818832	0.11598580835165	2.10316876940023	0.0354510192415854	0.434607363992303
Brd7	1143.21193315649	-0.0768721428869616	0.123716019243538	-0.621359653802283	0.534363011959978	0.884397237140872
Brd8	879.39979490989	0.0248976551969459	0.131232464663598	0.189721767862615	0.849527162316178	0.971819914777289
Brd9	428.648935338695	-0.0130708784342473	0.126766407758316	-0.103109953696624	0.917875705225396	0.98458017121548
Brdt	37.3539154870903	0.123777116648907	0.274983939292208	0.45012489444839	0.65262038747449	NA
Bre	402.240076334907	0.174092058125971	0.119449040999224	1.45745881816751	0.14498977118533	0.643429535912159
Brf1	453.853437648267	0.15480623401775	0.125979315174701	1.22882263491489	0.219138313030289	0.713388196744856
Brf2	98.5376744187008	-0.0796251365402593	0.167397569361294	-0.475664831001245	0.634313180027651	0.913869856629584
Bri3	998.208609634229	0.0690157314028342	0.116282664348303	0.593516942440451	0.552835247878958	0.889957380566248
Bri3bp	628.426720618849	-0.198968880693454	0.118765173880512	-1.67531334474897	0.0938727685159891	0.576538593303557
Brip1	254.943034912895	-0.549738348399118	0.243097348300971	-2.26139179321078	0.0237350065096433	0.396799763270524
Brip1os	1239.73463921992	-0.182778419195221	0.113846269000894	-1.60548449061414	0.108387223658056	0.594452704047215
Brix1	374.116084287345	-0.187714952118575	0.136642974486155	-1.37376219175904	0.169515522278579	0.669309622107927
Brk1	1173.3845765346	-0.135565398842543	0.0999375203583252	-1.35650152571801	0.174939650256847	0.673233660550134
Brms1	578.892014180527	-0.0155140443518653	0.10537551408095	-0.147226274407044	0.882953422589995	0.977802022017477
Brms1l	105.133334010579	-0.268371062475507	0.170082170335124	-1.57789062749328	0.114590738550697	0.605488975310752
Brox	1010.81809155938	-0.00874353240847646	0.093493329415482	-0.093520387637715	0.92549015367981	0.986762147302941
Brpf1	1287.31341478691	0.141799440293016	0.09751943588563	1.45406337726684	0.145928735896684	0.643966234766712
Brpf3	473.006410752893	0.164971638045919	0.0974118986181196	1.69354709626029	0.0903513782620879	0.566817055839805
Brsk2	74.4525456817774	-0.109082287911617	0.196786568622015	-0.554317749811174	0.579361404869077	0.895795816842312
Brwd1	1271.41301822963	0.127667882702131	0.0871264326283207	1.46531745706563	0.142834325862442	0.638538089248007
Brwd3	427.45946822193	0.00530090088287395	0.114512070678295	0.0462911975259453	0.963078155146512	0.995135804516086
Bscl2	566.73831506967	0.149626935641479	0.118617853431124	1.26142002500795	0.207157557295001	0.706803233068027
Bsdc1	736.66970810299	-0.069620407692041	0.110341010549354	-0.630956770700415	0.528068790454158	0.882017382914846
Bsg	2126.24238894134	-0.0601088191413389	0.119712645522233	-0.502109187205086	0.615590718023254	0.907696371491129
Bsn	82.6280250738417	-0.126133026634608	0.228973436676871	-0.550863141442072	0.581727496044525	0.896062442990182
Bst1	339.872531902864	-0.046235175671916	0.191980585299797	-0.240832559186728	0.80968489360976	0.962684050658319
Bst2	893.371272694036	0.138821334601523	0.202586201059874	0.685245756498955	0.493188854610108	0.873509812852559
Btaf1	1910.69317285945	0.152638353727474	0.10387613473772	1.46942658304408	0.141717121472356	0.637384892732345
Btbd1	479.496699465402	0.0306250852258554	0.135151998444117	0.226597353930496	0.820736850036586	0.964687142792196
Btbd10	388.201898758952	-0.225222293421842	0.128712256614082	-1.74981232826277	0.0801507026744462	0.552265205787271
Btbd11	476.871141886758	-0.309797501987762	0.19907217858604	-1.55620692046561	0.119658896277226	0.614255910599374
Btbd19	135.822701224232	0.250733679577123	0.195624300517173	1.28171029322153	0.199944292781277	0.698327692131268
Btbd2	367.296814901086	0.311368775367544	0.128452550262815	2.42399839263978	0.0153506734297029	0.343953746998617
Btbd3	76.6941265425309	-0.157629994815962	0.266874573914466	-0.590651977458454	0.554753630696891	0.890276815948786
Btbd6	200.323219551935	0.0384449477465236	0.157653567655194	0.243857137636156	0.807341466342373	0.962684050658319
Btbd7	603.872528796792	-0.00421512817394622	0.107131699743723	-0.0393452935408427	0.968615095530348	0.996230284313576
Btbd9	853.97367951864	0.111406782078984	0.101209954463876	1.10074925603042	0.271005802300321	0.75457640936474
Btd	122.473858851459	0.00197017624306037	0.166071558284411	0.0118634175738045	0.990534584308193	0.999115007797442
Btf3	447.301507748074	-0.172515086239313	0.111998479089305	-1.54033418705404	0.123478914592996	0.621720544082125
Btf3l4	179.794015647821	-0.158447458287682	0.16829297243635	-0.941497770191254	0.346449831416344	0.80631550238181
Btg1	7163.53178465755	0.114193833332152	0.175404818333033	0.651030196418763	0.515026994544922	0.880168847340732
Btg2	1347.81980917787	0.383760965019203	0.246136346093645	1.55913976586455	0.11896330350394	0.61280836003138
Btg3	28.1292079004807	0.12302929719909	0.316005853893329	0.389326006728407	0.697035000341333	NA
Btk	1217.82276767547	-0.0445378913809871	0.0855610502014627	-0.52053932573429	0.602687725857284	0.904357236039896
Btrc	243.100588794329	0.0664599347149143	0.12318661367381	0.539506142208731	0.589537659948513	0.898770948434017
Bub1	514.729368507125	-0.60542645395142	0.233727948501463	-2.59030406005396	0.00958911930038331	0.293343290352567
Bub1b	742.441059258132	-0.527784378207654	0.220774523327894	-2.39060363601732	0.0168207011403651	0.357945728216782
Bub3	987.036849241624	-0.320317628199418	0.122755964898142	-2.60938544587389	0.00907050096897202	0.289176492161407
Bud13	142.866922492164	0.0226479125430839	0.156149982153392	0.145039482110449	0.88467969914495	0.97813905548416
Bud31	397.802112293272	0.0444605311881133	0.160131879628957	0.277649467995588	0.781281454529818	0.957363261345991
Bysl	267.012724572912	-0.185340800816024	0.175218322612708	-1.0577706603532	0.290160011915613	0.773182627463693
Bzrap1	368.931015260726	0.358358120557192	0.217405824651465	1.64833725651875	0.0992834835207594	0.583651340627123
Bzw1	3567.79110138015	-0.233754838779845	0.0865864806347231	-2.69966901375715	0.00694084906140563	0.274232946416137
Bzw2	465.010789101401	-0.231808889944137	0.135207376663276	-1.71446925208409	0.0864425794302067	0.561338788231935
C030005K06Rik	72.1546027675116	0.38850243471842	0.237447173037321	1.63616365589392	0.101805340607693	0.589033494848096
C030013C21Rik	46.5447950541929	0.175595852809609	0.408256592195586	0.430111494012289	0.667114539357948	0.922358416167019
C030013D06Rik	38.113323950616	-0.0971364034444845	0.395778642442491	-0.245431140106553	0.806122619875554	NA
C030015A19Rik	57.8505698009981	0.364910466100525	0.299462640747197	1.21855088564646	0.223014700005394	0.718035652624977
C030017G13Rik	63.7131044309373	0.0641571701961702	0.22379677495955	0.286676026532403	0.774360395512536	0.955999493206543
C030034I22Rik	49.0138789178944	0.358585571130415	0.280083106840961	1.28028275312595	0.200445711082196	0.698695057646099
C130023A14Rik	90.6921643101477	-0.282075177414704	0.215709484569838	-1.30766237737395	0.190987849528042	0.688808316436252
C130050O18Rik	196.902931185058	0.115754908920389	0.164927074659008	0.70185510268533	0.482769530778695	0.870252053235847
C130083A15Rik	141.723534174897	-0.094054304397314	0.187906632799534	-0.500537437109283	0.61669670236768	0.907696371491129
C130089K02Rik	92.4865268422381	0.21479521647964	0.230200111275226	0.933080419856235	0.350778447832374	0.810640854388211
C1d	408.699101731519	-0.2848500786789	0.140260258303574	-2.03086806002012	0.042268380600263	0.460484480932829
C1galt1	999.775502002598	-0.173329756313548	0.140839912081293	-1.23068634275702	0.218440197981171	0.712647888174613
C1galt1c1	188.453716175464	-0.170362899319187	0.183058839506749	-0.930645577008074	0.352036930177042	0.811804768282675
C1qa	2594.42715651707	0.398181698032399	0.223672835566372	1.7801969426647	0.075043735585456	0.540161434909833
C1qb	6481.3861628875	0.382421677293305	0.220385848495993	1.73523699413149	0.0826988364335115	0.55889436105243
C1qbp	1141.61306213358	-0.200274125107515	0.121422115167207	-1.64940402192568	0.0990648913190654	0.583651340627123
C1qc	2987.74572018151	0.0879358742502452	0.17479267984588	0.503086710082946	0.614903310049204	0.907696371491129
C1qtnf6	37.2832835530371	0.407714964541869	0.291693233834074	1.39775256073918	0.162187384559645	NA
C230096K16Rik	54.6731252489502	0.490692062761122	0.366750330883155	1.33794579429419	0.180914107510388	0.678054381611246
C2cd2	217.752771441353	-0.0275668460163504	0.153197951420715	-0.17994265432862	0.857197588393403	0.972328695426226
C2cd2l	442.785812860429	0.110066477154182	0.144566350318126	0.761356131022016	0.44644438243458	0.859360546895334
C2cd3	412.653540460689	0.00630334330384416	0.111253129870109	0.0566576716646395	0.954817892938209	0.993445164905308
C2cd5	462.55352972377	-0.0111228197120106	0.161411784090467	-0.0689095890655454	0.945061585694941	0.991279447075315
C3	8535.546445967	0.364767671811817	0.192281511210672	1.8970501610639	0.057821318090887	0.5044635638004
C330006A16Rik	410.326480194751	0.0183938059391528	0.129013401449819	0.142572831445787	0.886627555607418	0.97813905548416
C330007P06Rik	667.325339106314	0.046180853817563	0.0937112348625517	0.492799544102662	0.622154232891196	0.909745142173617
C330018D20Rik	94.4603966505472	-0.333509460116875	0.202209091662412	-1.6493296981605	0.0990801086334418	0.583651340627123
C330027C09Rik	663.694066311899	-0.405957707878715	0.221292002360683	-1.83448883623479	0.066581463451247	0.523062189350998
C3ar1	4461.58733892993	-0.0703828139160041	0.142710053810359	-0.49318749476146	0.621880113018859	0.909568728974893
C430019N01Rik	259.551942957888	-0.0563004014770893	0.201542627426596	-0.27934736286791	0.779978262025969	0.956880329516673
C430049B03Rik	30.6565692395395	-0.0992861809890406	0.359179082836653	-0.276425286809348	0.782221436989856	NA
C530043K16Rik	113.863960692648	-0.0251343307800765	0.194510583658349	-0.12921831967881	0.897184900729184	0.979652801545349
C5ar1	3576.53983678681	0.11255215063262	0.180950285542205	0.622005929945703	0.533937968777811	0.884397237140872
C5ar2	54.2431770035902	-0.0213249011888447	0.271548058326815	-0.0785308549810347	0.937405787277525	0.989850405042361
C730036E19Rik	31.3022196266176	0.018617557222413	0.37486369206807	0.0496648718356867	0.960389450110773	NA
C730045M19Rik	69.1631938145629	0.0501751959543072	0.21132446667828	0.237432024521296	0.812321647939859	0.962696739938401
C77080	4491.031775339	0.02358205017241	0.214007385608892	0.110192693141475	0.91225655701389	0.983290815867665
C78197	55.6901664270814	0.017905234215356	0.21944519562323	0.0815931930726699	0.934970214388156	0.989720437731918
C87436	145.954829545717	-0.0190846713200564	0.154811987953263	-0.123276443719707	0.901888193723987	0.980502671193999
C920009B18Rik	505.69784103761	0.210179178668553	0.150317396510017	1.39823588984623	0.162042242565625	0.662596336964206
Caap1	128.360117976111	-0.116815898707693	0.182608653107836	-0.63970626101004	0.522363584256572	0.882017382914846
Cab39	3385.16470798192	-0.132773583142477	0.0867237487127164	-1.5309945097312	0.125770749559989	0.621720544082125
Cab39l	580.653562740481	-0.181979132936566	0.123689775654166	-1.47125445069426	0.14122231657442	0.637384892732345
Cabin1	1738.2846151651	0.0889434757403736	0.101880743537201	0.873015573427735	0.382654589295368	0.826622177864584
Cables1	66.6741203563409	0.365529080852614	0.295988355579427	1.23494412520741	0.216851299792944	0.712005112588854
Cables2	246.6796011012	0.178083504927427	0.141237257250371	1.26088192587696	0.207351390992994	0.706803233068027
Cacfd1	460.885440553114	0.144527576475997	0.114494775937122	1.26230716897834	0.206838278055505	0.706121575400893
Cacna1a	177.824282618514	0.29168003853887	0.19033116109565	1.53248704447449	0.12540229220029	0.621720544082125
Cacna1b	169.289598764807	-0.069295891858991	0.1743861884339	-0.397370299112061	0.69109441421576	0.930314352566855
Cacna1d	83.1620048323085	0.123948672269791	0.221194618769235	0.560360251797549	0.575233737771276	0.894469677173
Cacnb1	63.9396533598364	0.6415430905141	0.245299023672221	2.61535117796211	0.00891357561441715	0.289176492161407
Cacnb2	95.4670993488997	-0.00634709476603714	0.268956302047026	-0.0235989813874202	0.981172484661149	0.997201371986595
Cactin	397.051102944897	0.120546300851622	0.149613482765828	0.805718165389533	0.420405372928441	0.845903674641025
Cacul1	2434.57019376182	-0.10292800739086	0.10340280233092	-0.995408297170324	0.319537724812521	0.790398931120878
Cacybp	796.538620524461	-0.310667226088506	0.110108460896257	-2.82146552190221	0.00478047758795068	0.244966900204727
Cad	725.692123938568	-0.181987127645278	0.211217817059442	-0.86160878934783	0.388902832688934	0.832821188050936
Cadm1	667.627999332582	-0.148453110246135	0.191485351212233	-0.775271368312645	0.438179324171372	0.854795840915614
Calcoco1	481.848852324843	0.352652697225771	0.120914607803127	2.9165433658765	0.00353933517797935	0.22038513264592
Calcr	2101.5519965379	-0.0128620766227232	0.40046588739657	-0.0321177833806009	0.974378121639139	0.997011087024843
Calcrl	1183.75545415645	-0.213253391565731	0.113871597997163	-1.87275312998632	0.06110248294285	0.513559376392882
Calhm2	121.525904521428	0.107321368351183	0.181131579421571	0.592505010412352	0.553512466598402	0.890060808333697
Calm1	11057.1913699542	-0.156175204025935	0.109880817902902	-1.42131453884828	0.155225338715315	0.655018479185446
Calm2	2527.35983866349	-0.217999166168588	0.117972224294197	-1.84788552960522	0.0646189042998388	0.517952522285255
Calm3	2327.70332937376	-0.0778854083826729	0.0938402292731927	-0.829978879910115	0.40655072482654	0.839213155532175
Calr	18307.4744489482	-0.103179731235869	0.146251342297868	-0.705495960684755	0.480501644802462	0.870252053235847
Calu	3123.4483918121	-0.188282008147771	0.154686826916171	-1.21718191459061	0.223535009638859	0.718108314439805
Camk1	923.076555215322	0.161403254497431	0.120736203202249	1.33682565971583	0.181279551313352	0.678253321249104
Camk1d	1326.59674717807	0.183707338278238	0.200064798578509	0.918239188420488	0.358493656343398	0.814935394261638
Camk2a	218.283397871584	-0.0419072097346221	0.214285335487122	-0.195567324471163	0.844948837665637	0.970666766794081
Camk2d	2040.46488897861	-0.129774762914768	0.0994442221991095	-1.3050005324083	0.19189266649643	0.689796217469895
Camk2g	414.985784294291	-0.0187371545865229	0.110242969026889	-0.169962354533039	0.865039742571499	0.973344881710843
Camkk2	1051.49037046341	0.0226214598985862	0.150271323635041	0.150537436893324	0.880340616878417	0.976959749229836
Camkmt	37.2952925727173	0.225993565443576	0.301120528189224	0.750508664429422	0.452948407396416	NA
Caml	250.571257319136	-0.0866087441879709	0.156378899536929	-0.553839069365739	0.579688987537211	0.895895294600587
Camsap1	379.408677142119	-0.0774620280260304	0.126766220825369	-0.611062059921634	0.541158495870821	0.887227176072516
Camsap2	1041.61390735361	0.0849271993103799	0.116547310732289	0.728692912575727	0.466189529158744	0.866007262963103
Camta1	123.874862444574	0.163730259066701	0.174344010248012	0.939121790497926	0.347668217661773	0.807532463216987
Camta2	1296.8517971175	0.289603029647026	0.107945941109623	2.68285242288937	0.00729971945737235	0.278298780405366
Cand1	1893.15824623409	-0.125469152775097	0.0941686809264695	-1.33238728142606	0.182732959297437	0.680683144736806
Cant1	1411.02467117402	0.0792168323555519	0.100784443721457	0.786002575699953	0.431865978162427	0.852130299858327
Canx	10363.5989890447	-0.203150629763059	0.082747759774569	-2.45505896856308	0.014086147957718	0.342690730796263
Cap1	10366.5794779601	-0.000783657540973339	0.0985228617318584	-0.00795406799191599	0.993653638873158	0.999799152536572
Capg	10845.4823493058	-0.0855642530520131	0.121927001014888	-0.701766239961606	0.482824955863572	0.870252053235847
Capn1	877.089127096942	0.198399433998442	0.131376656074683	1.51015743531833	0.131003256827753	0.629191395564054
Capn10	84.1732322042445	0.226901423982952	0.208180545055323	1.08992616924244	0.275745667934626	0.759775520180688
Capn15	262.551845730205	0.328022031068276	0.13536482739164	2.42324418675788	0.0153825829391956	0.344018406751481
Capn2	2230.8558551717	-0.0991977351218888	0.111035534758032	-0.893387286674122	0.371649808525426	0.819413166006672
Capn5	415.89265204467	0.0470602433638879	0.158774806271569	0.296396163024731	0.766927555223575	0.954446781126061
Capn6	38.8128499010773	-0.247728468250364	0.468537973948106	-0.528726553715371	0.596995154016416	NA
Capn7	947.018358166074	-0.0572205533877935	0.0903082528007891	-0.633613779617864	0.52633290581976	0.882017382914846
Capns1	3578.79942091824	0.0211265385672904	0.0952724275598994	0.221748716899313	0.824509503472643	0.965754563850071
Capns2	38.1551229557709	0.655038494652607	0.359123040258553	1.82399462362818	0.0681528850467671	NA
Caprin1	6784.86714399358	-0.155019430794953	0.0756743751392538	-2.04850625472217	0.0405104198599926	0.455073108673011
Caprin2	117.512698505803	-0.125342335112427	0.215319462508546	-0.582122645357488	0.560484072764147	0.892692517397666
Capza1	1293.93178670881	-0.240305874926857	0.0957740018422061	-2.50909297204451	0.0121041621714484	0.326812378629107
Capza2	4319.14962256677	-0.169743869125659	0.0983628707618242	-1.7256904745763	0.0844031126203146	0.561135305338573
Capzb	4663.2272562318	-0.0205074901641302	0.124349874640717	-0.164917658529068	0.86900879321671	0.974198227290118
Car13	568.609287386772	-0.227964636332279	0.141618880661164	-1.60970511324479	0.107462248169149	0.594377054385869
Car2	3054.12605426921	0.0101883664515462	0.263294020698324	0.0386957760169563	0.969132941139013	0.996454957609362
Car5b	93.4852826294258	-0.286780774087154	0.225038300512425	-1.27436429014145	0.20253434174052	0.701949286431038
Car9	61.7056038586754	-0.163658136276409	0.273229480409175	-0.598976860151852	0.549188315457903	0.888895881009356
Card14	376.436052113892	-0.121994632925979	0.313658841262493	-0.388940520327577	0.697320146592143	0.931911531425944
Card19	943.334050522677	-0.00398934993967569	0.130900661842263	-0.0304761632487611	0.975687303520891	0.997011087024843
Card6	49.1618980668845	0.273525751473191	0.321438083467637	0.850943822593847	0.394800559919265	0.835503921081532
Card9	357.757046778823	0.11251403253859	0.117095756700716	0.960871988095726	0.336616536885885	0.80095139363495
Carf	154.936042987403	0.0637294687071147	0.18837937175582	0.338303860518877	0.735134214785557	0.945632833605951
Carhsp1	511.974356829088	0.0574608023428355	0.104361004335673	0.550596486768328	0.581910317760029	0.896062442990182
Carkd	336.157543974956	-0.0338638212349605	0.142902783908125	-0.236971039393692	0.812679257628673	0.962696739938401
Carm1	399.872716088001	0.0130538272284567	0.123798635267645	0.105444031755561	0.916023478492313	0.984270144049405
Carnmt1	84.0734742218275	-0.24027726660131	0.194183392021654	-1.23737289837082	0.215948675517691	0.711406030596784
Cars	724.450428035771	-0.204262064175438	0.11578030164282	-1.76422121273774	0.0776947426590483	0.546020085942746
Cars2	251.500943127144	-0.00703277471725279	0.125974920072035	-0.0558267845157694	0.95547979725479	0.993543441811223
Casc3	773.949479022737	0.103112133903686	0.103456018961768	0.996676026571166	0.318921789861687	0.790398931120878
Casc5	547.271043238112	-0.610311403858962	0.413384577011735	-1.47637681180746	0.139842764091233	0.636542351295464
Casd1	477.993135698471	-0.123629314741648	0.0969160161637135	-1.27563347767833	0.202085114055698	0.701422362376702
Cask	634.136166719569	0.141169550070662	0.087198859129061	1.61893803979385	0.105460595161202	0.590477792508547
Caskin2	139.530369065601	0.0966805577597561	0.168409562468274	0.574079977067629	0.565913682149016	0.893199739973878
Casp1	695.806968188397	-0.0998816477144718	0.142969099549037	-0.698624024558629	0.484787025630361	0.870897334767607
Casp2	380.844858240136	-0.225431111693815	0.155633607322258	-1.44847321585904	0.147484751439266	0.646621452466758
Casp3	576.911610457451	-0.0667195326090336	0.114141434461282	-0.5845338541953	0.558861195312716	0.891545322751228
Casp4	873.698147301916	-0.128613046481215	0.144360628704884	-0.890914978931951	0.372974783797289	0.820053706082305
Casp6	297.445796584295	0.0250402894329718	0.153442267870706	0.163190298087039	0.87036860481541	0.974689376920427
Casp7	292.844701842022	-0.243535035652644	0.170987623837392	-1.42428457795427	0.154364109980569	0.654318694416015
Casp8	1250.00334969757	-0.035834383381318	0.106925442110814	-0.335134301751873	0.737523778479418	0.946817711044993
Casp8ap2	344.068599573836	-0.344825327123645	0.177113740096525	-1.94691460377788	0.0515449735188396	0.485875251099377
Casp9	510.602427069139	0.0531943594965519	0.114568690909088	0.464301015176673	0.642432096761653	0.914847478476245
Cass4	98.3553915654813	-0.0237974248803814	0.210254150792931	-0.113184090733211	0.909884608367723	0.982944063341471
Cast	2202.9211117082	-0.127496157056537	0.119639560493694	-1.06566888519501	0.286573347742606	0.769822748446368
Casz1	76.047329550901	0.1578811022983	0.199025645447752	0.793270143368268	0.427620448041677	0.848668934376176
Cat	5332.0381187067	0.269015917553711	0.161729899796718	1.66336538816782	0.0962393170543719	0.579771764940604
Catsperg1	32.7801403830468	0.0342290054907087	0.367014749947933	0.0932632966265378	0.925694390004525	NA
Cav1	428.402180505003	-0.732161575556969	0.261855806845036	-2.79604865127262	0.00517316123402546	0.255774035348514
Cav2	1482.90358495094	-0.423684956318056	0.116612722876612	-3.63326527214665	0.000279857037477394	0.084500070366406
Cbarp	52.5776968194867	0.44059706049812	0.235573995041347	1.87031280944566	0.0614403917706151	0.513577548418266
Cbfa2t2	592.863719172763	0.106093079111707	0.109456396544552	0.969272536470948	0.332409228115688	0.798712057744831
Cbfa2t2-ps1	53.3448762926033	0.23456810027086	0.22610758016144	1.03741811797455	0.299541038150461	0.778763364864222
Cbfb	1573.63447521517	-0.281776717522478	0.110433860908731	-2.55154275331688	0.0107247165066255	0.30484427998329
Cbl	4648.04839605226	0.251650385825021	0.0861515621392315	2.92101941713284	0.00348888082432843	0.22038513264592
Cblb	1471.72690982561	0.0108779606409273	0.211895422371683	0.0513364588964384	0.959057416395518	0.994473718306787
Cbll1	226.458439272297	-0.145929309119517	0.126689564031873	-1.15186527189251	0.249376440839624	0.7362039734177
Cbr1	270.679966399389	0.0721637367579316	0.143436061766868	0.503107348800626	0.614888800251172	0.907696371491129
Cbr2	52.6022064442264	0.176030791777283	0.379700070468051	0.463604843581651	0.642930883509652	0.915003360740068
Cbr3	218.982823369602	0.242875981585223	0.142782018375468	1.70102639217876	0.0889380314122814	0.566817055839805
Cbr4	191.977673615383	-0.208546828399113	0.19330056263837	-1.07887336463302	0.280644184032648	0.764355586704728
Cbwd1	100.154956113119	-0.488997335317983	0.207077898814902	-2.36141731259827	0.0182052313074599	0.372045873598832
Cbx1	491.030279612897	-0.103377392314997	0.100896603857709	-1.02458743270276	0.305557896815797	0.783312698093514
Cbx2	33.0344360614686	-0.18256941641066	0.306017754962099	-0.596597463546753	0.550776165106456	NA
Cbx3	116.969410299777	-0.0782718974313036	0.18044041091125	-0.433782527073726	0.664446371100088	0.921548279191846
Cbx3-ps6	29.9499880924276	-0.414059849799945	0.311915024200873	-1.32747645247537	0.18435112429721	NA
Cbx4	294.132249390254	0.304444648520087	0.220956722070095	1.37784741585507	0.168250402980897	0.668309685603534
Cbx5	1276.79649912912	-0.392398764476463	0.211577154370472	-1.85463674300757	0.063648117486521	0.515740722898092
Cbx6	60.7447022540717	0.291710781691197	0.299096004472857	0.975308186431056	0.32940741091722	0.798132878495873
Cbx7	270.119259895437	-0.0200620481731829	0.164423624913695	-0.122014389256491	0.902887622439587	0.980502671193999
Cbx8	91.8881201544187	0.0465643278423009	0.222409402094782	0.209363126755122	0.834164775464561	0.968735233973196
Cby1	53.4929083943391	0.0235615223754699	0.238198113018469	0.0989156550272212	0.921205238951331	0.985283046575544
Cc2d1a	446.762365927377	0.19378242090976	0.106474881210711	1.81998250391348	0.0687616693528106	0.529513314391284
Cc2d1b	694.362005642107	0.0692673464857659	0.105609336750455	0.655882790452875	0.511899541951973	0.879576510212934
Cc2d2a	101.096379126435	-0.281570649712157	0.203019068786639	-1.38691725558091	0.165466995465957	0.667102141924485
Ccar1	1080.4134592518	-0.0901881716455692	0.0906964861173508	-0.994395433676186	0.32003039035309	0.790604463704706
Ccar2	689.71713325937	0.0326058835867735	0.119537474520735	0.272767044121528	0.785032294208704	0.958035229502324
Ccbe1	56.2999748210112	0.213901761614115	0.407806939795825	0.524517218174876	0.59991884722579	0.90319295010381
Ccdc107	106.303942536888	0.0453272724771059	0.167032785459514	0.271367518373166	0.786108381621485	0.958035229502324
Ccdc109b	288.281035340797	-0.117054882280596	0.128289148309109	-0.912430114498506	0.361542342780879	0.816997890420706
Ccdc115	321.055226262588	0.0346332855356836	0.132544268580676	0.261295987420257	0.793864260692703	0.959062651939419
Ccdc117	476.746712873677	-0.033129278248476	0.167294296300298	-0.198029932765956	0.843021644501975	0.970158478108942
Ccdc12	295.044365004533	0.00843849277950856	0.125332282636143	0.0673289642701766	0.946319819046036	0.991402582212539
Ccdc122	118.101244857405	-0.409479235138083	0.178131572842117	-2.29874596964916	0.021519368511237	0.389841285312667
Ccdc124	229.465828491763	0.0353180009311682	0.157245802212237	0.224603775962801	0.822287527146684	0.964911796779491
Ccdc125	47.7902305772998	0.324579119253537	0.252257796093308	1.28669608741638	0.198200237347552	0.696411948538503
Ccdc126	44.7127728732484	0.150935608248663	0.275275964640656	0.548306527399492	0.583481446164319	0.896980598430533
Ccdc127	428.964638873243	-0.0745627666885492	0.13290770329156	-0.561011625676662	0.574789611877532	0.894469677173
Ccdc130	120.384627861976	-0.055392577734575	0.187754084129994	-0.295027285245221	0.767973036289159	0.954460848650649
Ccdc134	123.339049218551	0.117950059011805	0.188370307415881	0.626160569730325	0.53120962708251	0.882680748898052
Ccdc137	96.3341954025926	0.160412890349824	0.190379655913019	0.842594706774312	0.39945515245832	0.837236972345073
Ccdc14	110.637105488013	-0.466351212498704	0.256177340262059	-1.82042335212648	0.0686945588910702	0.529513314391284
Ccdc146	100.547705607838	0.157119472138457	0.248400348056909	0.632525169016513	0.527043767325316	0.882017382914846
Ccdc15	81.8982718009891	-0.0753118951910295	0.260044200667009	-0.289611900584039	0.772113161666648	0.9556074995521
Ccdc154	43.4270258304578	-0.170748984636742	0.248903971938766	-0.686003454692755	0.492710929890409	0.873509812852559
Ccdc157	60.4056468432957	0.520522840959872	0.236098923560984	2.20468112733865	0.0274764783789705	0.405011259927459
Ccdc163	109.744091250855	0.351922143375036	0.194995991789078	1.8047660372204	0.071111301110236	0.5339115661079
Ccdc166	44.229973798944	0.254346998475786	0.257097590400917	0.98930137026628	0.322515713842725	0.793315327018361
Ccdc167	71.2736517329665	0.13512709426097	0.256228080564193	0.527370356767421	0.597936424655654	0.901565686146123
Ccdc17	39.1049250689691	0.0886637307090568	0.347923679664089	0.254836723946641	0.798849209832267	NA
Ccdc171	67.9773691379572	-0.124743226864281	0.271244592741867	-0.459892031775892	0.645593719919793	0.915917665157008
Ccdc174	246.905233926343	-0.0579319122305438	0.138810848587967	-0.417344269701164	0.676426612098081	0.92582635805075
Ccdc18	35.125639300012	-0.670781425826043	0.399555772074416	-1.67881800916922	0.093187517660036	NA
Ccdc181	54.6229281400606	-0.26170465784769	0.239849335286627	-1.09112104703123	0.275219622819635	0.759728101123854
Ccdc186	796.99449662915	-0.0614647991621009	0.10879410922962	-0.564964404758107	0.572097975448743	0.894189389398781
Ccdc189	73.0059262687135	0.30060164229391	0.307616934099504	0.977194715153993	0.328472763880098	0.797761578981037
Ccdc191	56.3224283680273	-0.130313724121113	0.318037596191846	-0.409743142576469	0.681994378650009	0.926177746349514
Ccdc25	205.083436753369	-0.191028896930441	0.146150940199526	-1.30706580929037	0.191190362024405	0.688808316436252
Ccdc28a	62.8087723189364	-0.272726559758561	0.261443607749271	-1.04315635064258	0.296875885700257	0.777365888688198
Ccdc28b	57.8592512374539	0.0249987364508332	0.245532741301831	0.101814268509724	0.91890409987434	0.984789357668223
Ccdc32	254.497194115394	-0.127964085113508	0.142977379333496	-0.894995318210662	0.370789590697981	0.819098902612503
Ccdc34	104.485297870176	-0.179855982992358	0.258949797263399	-0.694559273237862	0.487331542751603	0.872295496260155
Ccdc43	262.706354016884	-0.273910235434932	0.145287935511142	-1.88529236423713	0.0593903764945224	0.509373467865104
Ccdc47	791.701864384951	-0.192997062349594	0.115979070257531	-1.66406802469657	0.0960988361210891	0.579771764940604
Ccdc50	3166.26180911631	-0.0601805880213888	0.139589936425711	-0.43112411655418	0.666378126001913	0.922358416167019
Ccdc50-ps	96.260615690804	-0.21485072910093	0.222046659037873	-0.967592712414034	0.333247818279099	0.799298591837882
Ccdc51	60.5584920036567	0.203025840489575	0.250331887895058	0.81102668220473	0.417350348069423	0.844949652122102
Ccdc53	200.4467310952	0.0774675859978416	0.156290559001448	0.495663887139364	0.620131569988435	0.909255257183687
Ccdc57	78.6373189699673	0.160673613948651	0.228165525811008	0.704197592416913	0.481309730164699	0.870252053235847
Ccdc58	88.8266283312337	-0.224355764086454	0.218024625037842	-1.02903864206859	0.303461516890283	0.782074627805898
Ccdc59	330.135748427863	0.0270178996948819	0.143656790367239	0.188072555608505	0.850819774631516	0.971819914777289
Ccdc6	1315.13901267592	-0.000185354778246983	0.0971825475936674	-0.0019072846188595	0.998478207972201	0.999799152536572
Ccdc61	103.499101199781	-0.0646216540293228	0.209091136202056	-0.30905974879239	0.757276077044906	0.951653238042119
Ccdc64	51.4485104007703	0.21367999905638	0.312893045205132	0.682917061695287	0.494659252122062	0.873929962051394
Ccdc66	75.0053148060303	-0.326298320280297	0.227964592969644	-1.43135526455965	0.152328422606612	0.65283478679366
Ccdc71	347.920543872688	0.149171544014866	0.11369154264247	1.31207247740469	0.189495681282366	0.687719629589675
Ccdc71l	583.20390983081	0.162134068067127	0.101270686034925	1.60099703492887	0.109377575871366	0.597718951960953
Ccdc77	74.975783310409	-0.452635122965978	0.232586535956513	-1.94609340177201	0.0516435210456077	0.485875251099377
Ccdc82	227.617385754323	0.0645574691321086	0.175996950473612	0.3668101575532	0.713760630366138	0.938606260635735
Ccdc84	79.3393124697301	0.231376407655626	0.222265916359861	1.04098915139564	0.297880583218434	0.778115703813901
Ccdc85b	72.4704065294148	-0.0231481339002275	0.211021259391137	-0.109695743296278	0.912650676401461	0.983363905829202
Ccdc85c	99.0203575251851	0.203896678981984	0.324262772754663	0.628800763189216	0.529479500331621	0.882017382914846
Ccdc86	411.645030913085	0.0600756716375389	0.133692974030375	0.449355488373605	0.653175235580578	0.918837000310646
Ccdc88a	2998.22567268512	-0.0609032469072753	0.103117166739674	-0.59062180268228	0.554773853059031	0.890276815948786
Ccdc88b	1049.19839836572	0.141513194729445	0.161343969910357	0.877090075371705	0.380437714887522	0.825673227217677
Ccdc88c	28.3353106851142	-0.191274576853683	0.45691208763074	-0.418624461973665	0.675490609095385	NA
Ccdc9	651.765249082635	0.256915146940745	0.13556762974244	1.89510687343909	0.0580782442316642	0.504887477832533
Ccdc90b	115.52260008098	-0.141692410868738	0.192350586909837	-0.73663622838414	0.461343597404603	0.863778283166487
Ccdc91	255.509702776179	-0.151995175368195	0.135465321908998	-1.12202276734928	0.261852759714911	0.745067846245056
Ccdc93	1181.18933473125	0.0373605948042625	0.117094973166719	0.319062328585777	0.749679249280147	0.949556330596022
Ccdc94	113.072068057168	-0.140129882824435	0.157594584918461	-0.889179554595345	0.373906589006296	0.820478049968865
Ccdc97	731.431464326158	0.277187324890344	0.0959866603187526	2.88776923761969	0.00387984399593346	0.221579167427682
Ccer2	30.8867301972583	0.184652770246853	0.321387128411367	0.574549364063211	0.565596106025252	NA
Cchcr1	38.60076109501	-0.110080985121542	0.331452363242892	-0.332117062145891	0.73980086694484	NA
Ccl12	37.2070400544724	0.129547295503539	0.402226541273914	0.322075453035103	0.747395533911187	NA
Ccl2	1563.20681927622	0.357328178800292	0.180378150561241	1.98099480279888	0.0475918564248751	0.474658745512801
Ccl25	191.920553915258	0.0828749679840649	0.171451749149549	0.483371959721316	0.628831654166168	0.912181672588409
Ccl3	649.076411754553	0.25035201497977	0.242557095947923	1.032136429575	0.302008210126441	0.781423993588453
Ccl4	653.852012958915	0.258747517940245	0.238050755493526	1.08694264550352	0.277062157864766	0.760977912500347
Ccl5	117.647527279452	0.214245115906315	0.340551315750637	0.629112577157659	0.529275357040768	0.882017382914846
Ccl6	1786.93552135582	0.400935536075478	0.225662032299246	1.77670799110683	0.0756162968332382	0.540161434909833
Ccl7	610.974057336629	0.482092428589268	0.259387012756303	1.85858352531396	0.0630861940760085	0.515707852926097
Ccl9	16144.5996018856	-0.164239163676109	0.150310343322535	-1.09266707829737	0.274539999435898	0.758713596016249
Ccm2	447.245254803807	-0.0210290673241367	0.153182948371952	-0.137280732272334	0.890808899655557	0.979556869747472
Ccna2	607.538047596092	-0.482037927394032	0.214393778656748	-2.24837647068944	0.0245521942412086	0.399403354679918
Ccnb1	249.72678389796	-0.661249514086976	0.220123041751326	-3.00399953056251	0.00266455736130778	0.205084405218059
Ccnb2	283.884534598519	-0.515958887203979	0.207650915778249	-2.4847416890517	0.0129645469564908	0.335840927425841
Ccnc	351.344378965015	-0.139939320805817	0.124138843046251	-1.12728069129563	0.259623823455101	0.742596809703984
Ccnd1	2690.67452992913	-0.150491782272895	0.18260699859247	-0.824129323809502	0.409866079907387	0.840729359137326
Ccnd2	249.717229706157	0.408972744104213	0.219548065477809	1.86279365848273	0.0624913025941466	0.515707852926097
Ccnd3	431.476141386186	0.15897620145321	0.178696243026422	0.88964490109456	0.373656588266349	0.820270073393007
Ccndbp1	364.927049148589	0.00101092610761712	0.106916251299057	0.00945530819996154	0.99245586798094	0.999624354450891
Ccne1	101.133960651124	-0.335670672314354	0.234257371396212	-1.43291402235799	0.151882409456926	0.65283478679366
Ccne2	221.981497420561	-0.343095336440549	0.164196218947416	-2.089544684037	0.0366587199945365	0.437539277497057
Ccnf	945.849087062427	-0.28410001071696	0.228696055669839	-1.24226021251152	0.214140570159729	0.709539903200405
Ccng1	2890.96907590472	-0.14584395496985	0.106912806672346	-1.36413924121191	0.172523746409451	0.671567804988907
Ccng2	478.344294211512	0.0244257309476233	0.134020789885021	0.182253297929214	0.85538394763373	0.972328695426226
Ccnh	254.490637125051	-0.249525729022873	0.140144571030596	-1.78048801454034	0.0749961290897448	0.540161434909833
Ccni	2376.49243255948	0.0318246881716954	0.0963169577141899	0.3304162519972	0.741085463156257	0.94740631141332
Ccnj	58.0301427639002	-0.0623447949328148	0.211229251931112	-0.295152278213565	0.76787755530207	0.954460848650649
Ccnk	695.486651943974	0.126031604182475	0.105461056533085	1.19505349486933	0.232066130099834	0.724435038207356
Ccnl1	2772.82453974487	0.0906784060426465	0.14956653028817	0.606274718467672	0.544332343704601	0.888009770835405
Ccnl2	1289.16823569909	0.222684332693039	0.103815655526476	2.1449976071889	0.0319530383048744	0.419423436354016
Ccno	36.8291656042575	0.280344755668652	0.334896295417844	0.837109157385189	0.402531213496557	NA
Ccnt1	1021.89312672715	0.0388150224907594	0.0871937657901427	0.445158230511332	0.656205409851796	0.919642961258458
Ccnt2	1273.27655729134	0.086794323720294	0.095878886636706	0.905249599415623	0.365333170723585	0.817435410740069
Ccny	2294.46934859273	-0.0960683346864773	0.119906579423705	-0.801193188465562	0.423019813933896	0.845903674641025
Ccnyl1	110.367440377485	0.188198951458482	0.187885000093489	1.00167097620798	0.316502528836539	0.789095410728025
Ccp110	117.74332285811	-0.185589410908891	0.251325434285061	-0.738442614997691	0.460245526529919	0.863588764596982
Ccr1	3761.50132512498	-0.168156935413067	0.238480572612372	-0.705117962318845	0.480736829125961	0.870252053235847
Ccr2	59.2865572874556	-0.131858213539254	0.289583915719589	-0.45533680008297	0.648866955212804	0.917664355476072
Ccr3	409.18234322904	-0.554440675751923	0.254560567813455	-2.17803048018899	0.0294037675910889	0.410026890890796
Ccr5	1195.67111231551	-0.554506212912438	0.228260257453788	-2.42927182812234	0.0151291844897648	0.342690730796263
Ccrl2	1944.0997821085	0.0599931152448492	0.142650295192213	0.420560750778761	0.674075859296488	0.925797526821551
Ccs	139.902108290565	-0.0287308892577714	0.164309043294265	-0.17485884332195	0.861190550228245	0.973088961744008
Ccsap	161.08068860225	-0.31738058180699	0.213345742308947	-1.48763494584949	0.136847192247449	0.63327979328788
Ccser1	305.593650851566	-0.144176286930135	0.264115954221003	-0.545882536158695	0.585146683599751	0.897830892001016
Ccser2	1089.79761463765	-0.0336382259222296	0.120220840318694	-0.27980361668624	0.779628176779586	0.956880329516673
Cct2	2791.16966619555	-0.283902919475801	0.0962688136147545	-2.94906427965254	0.00318737673618389	0.215885560931404
Cct3	2565.67286522513	-0.287305205713328	0.146411975789658	-1.96230673183513	0.0497267839349975	0.48057354437689
Cct4	2144.39557990045	-0.176016088244693	0.0877832606783482	-2.00512132819541	0.0449500778825836	0.470047517286621
Cct5	2072.69321745507	-0.286659236516274	0.090732875546959	-3.15937563742166	0.00158107561904132	0.173523049189784
Cct6a	2313.55576978898	-0.3381467231865	0.119558537708584	-2.82829423700975	0.00467967733626563	0.244353372100249
Cct7	1807.74958402047	-0.270876493853016	0.102819344606423	-2.63448959813828	0.00842638856349038	0.287005700123711
Cct8	2614.68874359361	-0.280379899185593	0.0769870383461567	-3.64191044633931	0.000270622222581984	0.084500070366406
Ccz1	874.699009634731	-0.17695010887082	0.0888249512148779	-1.99212165557802	0.046357711448145	0.474506005004199
Cd101	41.2515156168042	-0.623588876559933	0.324019157299934	-1.92454323304933	0.0542865270886921	0.496751863519183
Cd109	2082.51071629707	-0.536338169116963	0.464548668796616	-1.15453601558328	0.248280481759108	0.736093381400618
Cd14	1612.28325081262	0.290368465779179	0.147200073684356	1.97261087247702	0.0485399133325478	0.477365910157015
Cd151	606.504858075945	-0.0346099420627741	0.136018880323479	-0.254449543919675	0.799148279589962	0.959884892255299
Cd163	61.9188746820439	0.683459763081756	0.248304079441964	2.75251121374146	0.00591401209812181	0.266148802478068
Cd164	1709.60112792859	0.204791074946342	0.122369944641239	1.6735406357071	0.0942209139124204	0.577157877314687
Cd180	2679.88343029707	-0.00425100047049315	0.17160760081262	-0.0247716327852801	0.980237117870795	0.997201371986595
Cd1d1	78.2465263811763	0.551110277885976	0.224986192395509	2.44952933341423	0.0143043058002673	0.342690730796263
Cd200	1172.89279146113	-0.337094646725247	0.26452340281269	-1.27434715847787	0.202540410449016	0.701949286431038
Cd200r1	711.32861235372	0.054554255696515	0.170718877882124	0.319556081748516	0.749304871582072	0.949183567688607
Cd200r4	232.297943707147	0.0522670443420792	0.198569346614212	0.263218090975671	0.792382487735625	0.959062651939419
Cd207	46.263362987913	-0.509175385491093	0.339880038693501	-1.49810323503658	0.134106430732579	0.632033210128532
Cd22	43.3918497336425	-0.0124355250232179	0.251238023406143	-0.0494969863821728	0.960523238776621	0.994504013733341
Cd244	62.6066022220727	-0.196778864412452	0.254084208356019	-0.774463181657981	0.438656932991565	0.854817500128361
Cd24a	288.609288019003	0.0681314731789986	0.173654841615214	0.392338460277225	0.694808149766763	0.931413820310501
Cd274	2382.74038304237	-0.105235293111051	0.168223269990351	-0.625569180275042	0.531597559054674	0.88270510314039
Cd276	219.321546516912	-0.125858476593426	0.315134481499234	-0.399380213788925	0.68961307085079	0.929554064699125
Cd28	711.850216135731	0.189811896219126	0.210625423994668	0.901182262896865	0.367491420012093	0.818022392212314
Cd2ap	862.789302874797	-0.0668989741226834	0.135547348550981	-0.49354690326179	0.621626207386391	0.90951011613642
Cd2bp2	597.701134876084	-0.0357521281024483	0.12910429086472	-0.276924398584945	0.781838157591313	0.957488927876767
Cd300a	1571.58028053653	0.135733706616397	0.220858972090327	0.614571847961351	0.538837510868759	0.886471530712798
Cd300c2	1053.0620300163	0.0948603287753868	0.155520391313163	0.609954283000559	0.541892092270977	0.887528944270816
Cd300lb	1282.48954387182	0.0321280472695834	0.227918612340197	0.140962806590048	0.887899324934054	0.978419033234799
Cd300ld	1625.41357079296	0.0776393248307533	0.153710646323088	0.505100503367617	0.61348824784742	0.90749915378462
Cd300lf	114.044121520247	0.242860855576778	0.204348094167802	1.18846645752101	0.234649687189766	0.727291589603417
Cd302	358.458808423735	0.12866530742527	0.171834565022225	0.748774307477823	0.453993247774324	0.86135580382557
Cd320	90.1717974821697	-0.016603206969768	0.206941572214492	-0.0802313754172073	0.936053236614229	0.989806567969854
Cd33	1357.5249252621	0.388197238364908	0.192842254347408	2.01302997456961	0.0441114760737673	0.465005756941915
Cd34	68.9264536310865	0.182677663344053	0.390792311182508	0.467454599583304	0.640174666825059	0.914847478476245
Cd36	5915.59240897534	0.113037934549865	0.210342305221744	0.537399903603318	0.590991409901303	0.898770948434017
Cd37	1695.83139142999	0.171893655958922	0.105158364576132	1.63461705259286	0.102129350612854	0.589033494848096
Cd3eap	84.1351311174435	-0.18429241491576	0.220858291702518	-0.834437382880736	0.404034558966907	0.838606407580697
Cd4	89.9816087833593	0.383763980080542	0.321787675286239	1.19259999544474	0.233026067646016	0.725902228596119
Cd40	232.958832946334	0.149615781947613	0.296888937903473	0.503945290128179	0.614299823134646	0.907696371491129
Cd44	14966.6719019112	-0.220003281550464	0.18589630818673	-1.18347310765028	0.236621698335972	0.727291589603417
Cd46	42.1408969686006	0.330794094562343	0.265332745667804	1.2467141729144	0.212502320169325	0.708450162537481
Cd47	4666.80385113605	0.0575318453766899	0.0921897472270572	0.624059042433351	0.532588810731015	0.88364714076074
Cd48	662.064497692302	0.0305079101095009	0.165309448612976	0.184550310738294	0.853581762622023	0.97199233025551
Cd5	106.436136080371	0.0190388991842729	0.25433727097677	0.0748568981304036	0.940328570600562	0.990686525531572
Cd52	1379.89510528166	0.080292129312151	0.148933721251556	0.539113161461491	0.589808774603888	0.898770948434017
Cd53	3430.28001899626	0.0410498179829396	0.150079259994894	0.273520924772258	0.78445280973222	0.957971957200645
Cd55	473.252989191011	0.19033616193717	0.175336445549526	1.08554819473289	0.277678930224877	0.760977912500347
Cd59a	215.500979091336	-0.00996896930396327	0.199026975499202	-0.05008853337071	0.960051837313993	0.994504013733341
Cd5l	191.760164067654	0.282838934876562	0.31410573627072	0.900457719220988	0.367876716200556	0.818022392212314
Cd63	2707.38527753454	-0.0207895641053072	0.153118173929176	-0.135774634531126	0.891999444052467	0.979652801545349
Cd63-ps	4294.90368547239	-0.0556662478698132	0.152244479479094	-0.365637217587632	0.714635799680832	0.938606260635735
Cd68	9874.71199882276	0.0682353985847306	0.14655958356249	0.465581280501091	0.641515244747803	0.914847478476245
Cd69	310.799045286137	0.127062470127121	0.192121076729337	0.661366635510423	0.50837721728158	0.878523860101847
Cd72	726.146517715041	-0.0106053544827101	0.157817512295734	-0.0672001118788181	0.94642239606119	0.991414827040622
Cd74	4890.81839426709	0.581293249626391	0.242128075396533	2.40076764610798	0.0163607213570677	0.354172576752538
Cd80	299.748812942833	0.316325117221138	0.173713313724764	1.82096069920313	0.0686128311771515	0.529513314391284
Cd81	2214.96505226803	0.0431888041749272	0.166211768595925	0.259842034891783	0.794985625128536	0.959062651939419
Cd82	2177.83413206706	-0.0644383518290978	0.105919798624607	-0.608369281908056	0.542942580083382	0.887581776415558
Cd83	729.498918942318	0.184594710798919	0.177757769733109	1.03846212222439	0.299054960860752	0.778405327970325
Cd84	5199.03299025137	0.141982478578637	0.15143556440489	0.937576844228095	0.348461915892296	0.808310193785867
Cd86	631.772046637164	0.527869834763367	0.220938507105165	2.38921608405774	0.0168843684188498	0.358656664639117
Cd9	1768.45473885416	0.0394144840791713	0.171918639926846	0.229262423760116	0.818664957187223	0.964228820915787
Cd93	7167.33279059166	0.337466892392314	0.18211955320916	1.85299648744878	0.0638828621150753	0.516341933313697
Cd99l2	843.904825794813	-0.0663316221506807	0.171943769754849	-0.385775083594211	0.699663250000636	0.933679368705562
Cdadc1	342.568426315673	0.0633445852482636	0.125344831458024	0.505362562711466	0.613304208390281	0.90749915378462
Cdan1	335.721218269299	0.0431223585455952	0.154122844470344	0.279792127466819	0.779636991952017	0.956880329516673
Cdc123	403.202308940451	-0.11576014195665	0.141108234630637	-0.820364185404645	0.41200852600984	0.841645213102447
Cdc14a	113.490381342261	0.0536864708062892	0.158617625380768	0.338464724064635	0.73501300617134	0.945632833605951
Cdc14b	259.723039651107	0.0105513824839056	0.167370292272016	0.0630421464925037	0.949732943000223	0.992172093546769
Cdc16	548.819348991301	-0.0736559845838267	0.130493188597411	-0.56444313588708	0.572452589295349	0.894189389398781
Cdc20	325.986645409619	-0.466425421481501	0.250987851285684	-1.85835855836145	0.063118113185037	0.515707852926097
Cdc23	317.123054669869	-0.13862093596905	0.120318937035521	-1.15211237220393	0.249274899713649	0.736093381400618
Cdc25a	313.194959594188	-0.196690945990424	0.182938049472723	-1.07517788976837	0.282295092461212	0.765860318366387
Cdc25b	449.327624970594	-0.234212276019327	0.241739972109704	-0.96886035840626	0.332614866499731	0.798851432507727
Cdc25c	65.1961837692601	-0.571624496256625	0.275327083790899	-2.07616515014104	0.037878679251271	0.445369029741719
Cdc26	262.100652644814	-0.106099600535013	0.142708482523126	-0.743470876146551	0.457196647624226	0.862538989177867
Cdc27	1179.36110981982	-0.169128127677242	0.0854213988809519	-1.97992692572207	0.0477117403621105	0.474658745512801
Cdc34	738.837082862938	-0.0351168080465112	0.0998871048101741	-0.351564980417116	0.725164532138753	0.941833652963202
Cdc37	1979.10965028667	-0.0724471094647649	0.0818461528384214	-0.885162062629726	0.376069230311452	0.822425938539047
Cdc37l1	248.021778005045	0.0347402413434081	0.132941495679666	0.261319772023008	0.793845920294637	0.959062651939419
Cdc40	463.784188725657	-0.164134312329517	0.120189385197145	-1.36563068410983	0.172054910626157	0.671506441177159
Cdc42	9880.36462178177	-0.240897910047029	0.0911837053118853	-2.64189647945388	0.00824432501910953	0.283958231789861
Cdc42bpa	664.532807915434	0.0705688812172904	0.156999156754659	0.44948573403848	0.653081296959581	0.918837000310646
Cdc42bpb	2065.16636469033	0.16417500324235	0.135938762963469	1.20771294120478	0.227157698447501	0.721078647210282
Cdc42bpg	540.843336874448	0.338854856794162	0.153049524587933	2.21402096939854	0.0268273364718279	0.403970473495378
Cdc42ep2	528.927074888264	0.0481074889044271	0.165221292296743	0.291170031632633	0.77092128135324	0.955130129390608
Cdc42ep3	227.817165582691	-0.0745132178597955	0.159219948063477	-0.467989210937871	0.639792305212501	0.914826810632399
Cdc42ep4	746.92859895525	-0.107130190300284	0.139672029363428	-0.767012484808465	0.443074092610733	0.857929655733012
Cdc42se1	1048.53936315305	0.0505278446814054	0.187637958515202	0.269283705073522	0.787711370673384	0.958755109638304
Cdc42se2	2824.030370875	-0.0116934512981105	0.0980110059023976	-0.119307532765812	0.905031715844148	0.981009687050818
Cdc45	171.038619392138	-0.26425130688215	0.334946352977254	-0.788936211824033	0.430149289670484	0.851178552665151
Cdc5l	766.062026631	-0.165210074860782	0.115807513076866	-1.42659202733353	0.153697523604579	0.654138867965916
Cdc6	135.009245428857	-0.292186296053593	0.258144308687722	-1.13187192674874	0.257688282752108	0.741640414397366
Cdc7	96.6035450917879	-0.321192237094306	0.243483659796197	-1.31915315123468	0.187117916896962	0.685034185933768
Cdc73	958.717890368406	-0.0164303440915519	0.0966036165321876	-0.170080010266256	0.864947213961805	0.973344881710843
Cdca2	267.486565644343	-0.440724018635866	0.24113153383545	-1.82773282127678	0.0675896597602133	0.526719419551485
Cdca3	264.263583464123	-0.467103808561241	0.24136137821385	-1.93528812280555	0.0529549490129961	0.492071694086397
Cdca4	284.208423583784	-0.252502219018704	0.203819100806681	-1.23885454316766	0.215399370430129	0.710979876833282
Cdca5	184.122075551465	-0.546253136336287	0.244131910472968	-2.23753271449851	0.0252515436388724	0.402026580321932
Cdca7	67.3243450401937	-0.912713089980965	0.304709231695093	-2.9953575246262	0.00274123329635256	0.206659044462538
Cdca7l	171.840340436016	-0.175947671552043	0.180337438095273	-0.975658040894923	0.329233951746389	0.798132878495873
Cdca8	340.952110714805	-0.49466791971458	0.221100755472487	-2.23729637946052	0.0252669756991244	0.402026580321932
Cdh23	185.84066471744	-0.0252237747986387	0.197793355286534	-0.127525895711199	0.898524178688798	0.979652801545349
Cdip1	505.458881747142	0.0992440843687376	0.116939786899759	0.848676801966549	0.396061157999071	0.835984880299822
Cdipt	921.552235247074	0.00618563588705972	0.107986187206301	0.0572817324797518	0.954320771826749	0.993445164905308
Cdk1	523.793614386935	-0.534557640659435	0.231265987450055	-2.31144080698369	0.0208085191575571	0.387804052790133
Cdk10	131.294418128835	0.214921483770294	0.170449363944029	1.26091103420526	0.207340902245557	0.706803233068027
Cdk11b	663.861294369918	0.205432023936763	0.143339338907209	1.43318662903664	0.151804509760849	0.65283478679366
Cdk12	1610.57428033908	0.0898258112538305	0.105287762325599	0.853145790828444	0.393578460728657	0.83478327565115
Cdk13	1836.64288449722	0.105060777861915	0.0831792553016527	1.26306466054437	0.206565942979485	0.705789266884664
Cdk14	2056.57349621796	-0.213270271621922	0.13904806064505	-1.53378817822091	0.125081772240655	0.621720544082125
Cdk16	886.333633722595	0.0851027876561757	0.116887988345884	0.72807128311891	0.466569951700214	0.866007262963103
Cdk17	574.292007914437	-0.0602751374365386	0.10017242021929	-0.601713897943052	0.547364597232315	0.888876910671959
Cdk18	3285.83556445637	0.185750031341728	0.125809147188697	1.47644297328498	0.139825013586608	0.636542351295464
Cdk19	629.082137051392	-0.0368095774454549	0.147452054661857	-0.249637602743944	0.802867616252921	0.961251500550088
Cdk2	364.902473848418	-0.0851923139998031	0.14642260093561	-0.581824892164473	0.56068463544952	0.892772029014396
Cdk20	163.01280470394	0.0377121947411946	0.190568306801192	0.197893319063475	0.843128531426661	0.970158478108942
Cdk2ap1	97.0877860578872	0.0219147555307983	0.222153190998722	0.0986470436561247	0.921418516717946	0.985283046575544
Cdk2ap2	386.430838322724	0.152852167561634	0.101498722151444	1.50595164472679	0.132079587387977	0.629423496439573
Cdk4	1076.86643838488	-0.150667249119266	0.120756470570102	-1.24769503785555	0.212142759191503	0.708317781604755
Cdk5	324.581663557434	0.096231434991918	0.154829763349713	0.621530595345292	0.534250570439391	0.884397237140872
Cdk5r1	46.9882102209436	0.0659312888000944	0.320417357115656	0.205766907865407	0.836972991723779	0.96921631419142
Cdk5rap1	132.322658414748	-0.120189328128291	0.215648778920089	-0.557338319883685	0.577296298858808	0.894469677173
Cdk5rap2	941.796765494028	-0.205806760560189	0.145429170148744	-1.41516836236974	0.157019138242004	0.656511900482605
Cdk5rap3	256.391961458575	0.0663906110598289	0.152346028675421	0.435788262005022	0.662990361002893	0.921548279191846
Cdk6	5073.05352349564	-0.0856916939434647	0.0870335080434525	-0.984582787363714	0.324829047930155	0.794674655338725
Cdk7	354.530545959599	0.0149591873517318	0.118921818496861	0.125790099250178	0.899898079172584	0.979979945483724
Cdk8	703.355867052591	0.0719932805270481	0.12716358652631	0.566146980386975	0.571293868676142	0.894189389398781
Cdk9	1109.34556067134	0.0902444673807169	0.105285253133657	0.857142521813136	0.391366123607554	0.833129070244313
Cdkal1	440.187612947053	-0.107447793436134	0.119476240287189	-0.899323523889423	0.368480360907481	0.818022392212314
Cdkl2	141.440896558904	0.0241735363352916	0.172037645750451	0.140513061718809	0.888254633113935	0.978419033234799
Cdkl3	57.9230899268183	-0.230217192279781	0.282300385858899	-0.815504348601385	0.41478367641793	0.843794882332354
Cdkl5	40.6416221759202	-0.132814848816508	0.296975503482245	-0.447224930201855	0.654712662885475	0.919399593096416
Cdkn1a	3365.82361024017	0.20318854920444	0.106604412226957	1.90600506076482	0.056649549064864	0.50259513852233
Cdkn1b	827.864258387589	0.107488671044937	0.11572480513546	0.928830002514304	0.352977193222759	0.812154804468611
Cdkn1c	34.083126520839	0.46422611200213	0.391444470886737	1.18593094686079	0.235649570634978	NA
Cdkn2a	103.019002939209	0.289582747011965	0.221027993515918	1.31016321690995	0.190140626269917	0.688808316436252
Cdkn2aip	146.057758356903	-0.108548521915794	0.23048459013132	-0.470957827826788	0.637670850966166	0.914824577704645
Cdkn2aipnl	414.645898014307	-0.215059736843227	0.151825386393712	-1.41649392075668	0.156630942817612	0.656511900482605
Cdkn2b	270.968756359308	0.0302935287891283	0.154927061634962	0.195534133736466	0.844974818506203	0.970666766794081
Cdkn2c	578.540176034641	-0.376290727357062	0.167201632644526	-2.25052065225382	0.024415914020375	0.399403354679918
Cdkn2d	151.210358255541	-0.195969453096364	0.196468471706062	-0.997460057558528	0.31854125231441	0.790398931120878
Cdkn3	84.5351038208145	-0.592042095364255	0.319010587389507	-1.85586973839643	0.0634721272935282	0.515740722898092
Cdon	233.838724129893	0.0869185675416846	0.247573524753164	0.351081835702523	0.725526954688362	0.941940843639372
Cdpf1	75.5852289033006	-0.439419955786755	0.234818246264462	-1.87131946847036	0.0613008136470112	0.513559376392882
Cdr2	136.545069451086	0.0349366053190962	0.16320060665632	0.214071540755165	0.830491268539158	0.967248641192754
Cds1	291.410665713549	0.240926950505516	0.123730256459877	1.94719511135616	0.0515113475688862	0.485875251099377
Cds2	2236.21276613226	0.23905438051551	0.126785442642931	1.88550337903355	0.0593619086741063	0.509373467865104
Cdt1	937.662368355462	-0.266432776129235	0.159613220908266	-1.66924002042638	0.0950698217235148	0.578771742044614
Cdv3	2434.83561760489	-0.134775284041498	0.0941586987549747	-1.43136306919681	0.152326186956241	0.65283478679366
Cdyl	391.91476199827	-0.0656365954372453	0.103846531282012	-0.632053806968273	0.527351718153703	0.882017382914846
Cdyl2	223.776872193481	-0.0328231491639215	0.134972872595457	-0.243183304413323	0.807863399858986	0.962684050658319
Ceacam1	279.13652496903	-0.0461746299709721	0.161685815926985	-0.285582440897747	0.775197953736056	0.955999493206543
Ceacam16	94.0981233602417	0.0695174206352831	0.201398326399911	0.345173775164567	0.729963732949382	0.94426062715803
Ceacam19	47.3929885384693	-0.0883016588274985	0.271680290531156	-0.325020481444796	0.74516557057523	0.948085815380763
Cebpa	825.797693946587	0.348529258360858	0.160577064172668	2.17047970179654	0.0299705247024798	0.411142141293429
Cebpb	1514.00560759533	0.321033444335896	0.17332729478434	1.85218055087825	0.0639999006482442	0.516751241405748
Cebpd	260.951648156992	0.194719780182848	0.164228929481747	1.18566065550887	0.235756338102183	0.727291589603417
Cebpe	36.2423105593861	-0.0291641125920439	0.308248749971089	-0.0946122655640265	0.924622807031265	NA
Cebpg	523.546777113048	-0.122198707512559	0.108347958265506	-1.12783581221818	0.259389265942579	0.742596809703984
Cebpz	584.271430933925	-0.0946345834285568	0.116217460167954	-0.81428886237742	0.415479488653815	0.843844821626743
Cecr2	100.612636491636	0.0726328733803041	0.215374213104161	0.337240342441445	0.735935727825937	0.945947834578684
Cecr5	96.4370985336599	0.0429108381101786	0.181405765861438	0.236546164375806	0.813008889461182	0.962696739938401
Celf1	1801.48148744316	0.075286093972033	0.0964736052095841	0.780380227404975	0.435167102685932	0.852963904557338
Celf2	2385.72841029883	-0.055744084356949	0.179635649506181	-0.310317492714779	0.756319530045931	0.951646944936644
Celf3	79.428464182068	0.209081033432382	0.194687500501132	1.07393146911949	0.282853397802657	0.766848427299837
Celsr1	85.4553916395482	0.24951070083893	0.382148145984284	0.652916162124179	0.513810328887775	0.879576510212934
Celsr3	147.412318843764	0.157807649875728	0.167611437719803	0.941508837478836	0.346444162555976	0.80631550238181
Cenpa	747.340203565607	0.116573805920259	0.27904373070001	0.417761781021998	0.676121296790927	0.92582635805075
Cenpb	3358.78566329126	0.0560852712794043	0.115126530402812	0.487162004128586	0.626143529221723	0.911840814900505
Cenpc1	362.188351195625	-0.235252046447422	0.138950090563347	-1.69306868022638	0.0904423950143847	0.566817055839805
Cenpe	763.096295467065	-0.605258742688322	0.250171284644341	-2.41937736198939	0.0155471022114414	0.344448228994795
Cenpf	759.069798595894	-0.592760110389831	0.241600214201257	-2.45347510286581	0.0141483333183756	0.342690730796263
Cenph	55.5057419683293	-0.446997482222764	0.27261171074571	-1.63968554762389	0.101070565435641	0.588114586209453
Cenpi	214.586658633808	-0.603376832327045	0.247581398916705	-2.43708467181754	0.0148062119674099	0.342690730796263
Cenpj	115.467095825524	-0.0158025875959335	0.180318672186297	-0.0876370006740453	0.93016519301813	0.988634149286576
Cenpk	54.4481027525554	-0.73127189887606	0.28167545459788	-2.59615059437829	0.00942747355933498	0.291759384069967
Cenpl	252.958110771487	-0.285248183786655	0.18397042789194	-1.55051106340962	0.12101890016267	0.618558440546841
Cenpm	34.2721623579982	-0.391371599035838	0.321012348337084	-1.21917926541839	0.222776159928089	NA
Cenpn	142.794361161317	-0.275454309979336	0.238784076711939	-1.15357068097818	0.248676224310537	0.736093381400618
Cenpo	176.645986090439	-0.206031727430361	0.177944961703364	-1.15783962332026	0.246929490230483	0.735864257743929
Cenpp	48.5780378793194	-0.299191866092861	0.283304047534121	-1.05608045030429	0.290931461202133	0.773359634363957
Cenpq	94.5295099728438	-0.335788658600307	0.296030947701453	-1.13430254913398	0.256667660264605	0.740873191274651
Cenpt	131.414877836665	-0.149686668608659	0.153008032433832	-0.978292879319203	0.327929490691887	0.797486305533636
Cenpu	77.5871226554003	0.0130582920584357	0.289991209960436	0.0450299581846541	0.964083429988531	0.995246688432371
Cenpv	58.2553556704533	-0.324079925421767	0.276238591624001	-1.1731884510289	0.240720242311917	0.730480550978789
Cenpw	50.6980617051314	-0.496789691040444	0.287840691255752	-1.72591890629889	0.0843620028795281	0.561135305338573
Cep104	421.73081473291	0.0673156863093353	0.111076369221775	0.606030668637833	0.544494388129746	0.888009770835405
Cep120	600.113468341032	0.128494115462352	0.10193447828031	1.26055597311251	0.207468869452295	0.706803233068027
Cep128	554.049507510347	-0.296628633472366	0.18597196638847	-1.59501799778118	0.110708211165937	0.597979959590197
Cep131	113.602232363776	0.120560077388043	0.196539729839249	0.613413265026108	0.539603117202164	0.886471530712798
Cep135	332.329161106743	-0.130467390687817	0.155496069357904	-0.839039798411376	0.401446976759199	0.837337859186443
Cep152	545.720499942534	-0.196927021943936	0.203350145865045	-0.968413477680162	0.332837911073612	0.798851432507727
Cep162	345.507854605186	-0.0384770930032183	0.118828234729915	-0.323804296938963	0.746086202837748	0.948451282951075
Cep164	448.747025826771	0.08340070405314	0.139789239020115	0.596617483847515	0.550762795483294	0.889457641252763
Cep170	1740.11826055203	0.0777422542795261	0.0809563056297152	0.960298937492408	0.336904784665574	0.801391212651225
Cep170b	621.704748991868	0.283818862503475	0.149151250475072	1.90289294658586	0.0570545155367371	0.503549644569579
Cep19	37.4381366898324	0.183469747774342	0.326889565280342	0.56125911396712	0.574620909604447	NA
Cep192	1265.57569718517	-0.0935485603547546	0.142330402169015	-0.657263374016656	0.51101158252013	0.879486029854958
Cep250	762.108570086033	0.119178959275981	0.122723586216428	0.971116986964545	0.331490025678584	0.798482175951353
Cep290	151.044470323458	-0.295771712118055	0.21063510103046	-1.40419004558639	0.160262265286861	0.660896013791916
Cep295	441.487731771287	-0.22060340536188	0.212667490245609	-1.037316070769	0.299588578504487	0.778763364864222
Cep350	3217.9343201281	0.0449773528447877	0.0794623581956023	0.566020866560147	0.571379595693362	0.894189389398781
Cep41	55.3349954564487	-0.373717040561407	0.267322804205549	-1.39799910326412	0.162113336471459	0.662596336964206
Cep44	132.39450083039	-0.176620467139249	0.175500785241974	-1.00637992528485	0.314232846551554	0.788873755889249
Cep55	206.684529847917	-0.563630628155851	0.199771239868009	-2.82138023735672	0.00478174882232454	0.244966900204727
Cep57	575.809576320521	-0.0288994559136884	0.115361112845912	-0.250512977906943	0.802190669685558	0.960951075573747
Cep57l1	92.0518721622233	-0.168502819550186	0.207834908267211	-0.810753212513964	0.417507408115101	0.844949652122102
Cep63	229.854383130128	-0.0301066100411645	0.180405598816368	-0.166882902962505	0.867462185951876	0.974198227290118
Cep68	509.088025176465	-0.0761539535741034	0.120994159250496	-0.62940189878456	0.529085975204516	0.882017382914846
Cep70	379.273686712053	-0.0587733322947189	0.118172933296094	-0.497350202414425	0.618942115518598	0.908005755120275
Cep72	55.5792061434603	-0.408262444284117	0.287999650827935	-1.4175796502199	0.156313524846085	0.656511900482605
Cep76	167.707603145773	-0.256779682520161	0.167512172363465	-1.53290163274228	0.125300093537733	0.621720544082125
Cep78	145.682645523321	-0.0377126515654793	0.189755946638392	-0.198742923389623	0.842463845710067	0.970158478108942
Cep83	525.860641026517	-0.138939611152312	0.106162109254628	-1.30874953528917	0.190619206260038	0.688808316436252
Cep83os	127.825035657729	0.095006269119113	0.227952750759768	0.416780533695937	0.676838942172062	0.92582635805075
Cep85	600.258201638103	-0.0452386634514123	0.176712269678319	-0.256001824512601	0.79794942849371	0.959554841046897
Cep85l	146.868882849552	0.275076561497242	0.168534248700011	1.6321700996625	0.102643657736495	0.589108053034729
Cep89	117.749564717014	0.0296905500090713	0.225498434234358	0.13166632446864	0.895248222749842	0.979652801545349
Cep95	142.265630150462	0.119716302128925	0.165218316076544	0.724594615002987	0.468700763492324	0.866404124284443
Cept1	714.137327827978	0.0127193870058864	0.118590652011273	0.107254549917453	0.914587040391709	0.983725024576116
Cercam	77.0883279929841	0.234864467730791	0.203609430662081	1.1535048596083	0.248703224084909	0.736093381400618
Cerk	2993.792011407	0.189398390635564	0.120247752180381	1.57506803413217	0.115240741547342	0.606160379735245
Cers2	2184.43963243752	-0.00254362096543068	0.0968065771016045	-0.0262752908075759	0.979037763184727	0.997201371986595
Cers5	698.710490829227	-0.0939009788563065	0.110837845523518	-0.847192386434305	0.396887896527544	0.836173522492175
Cers6	2814.50894359904	0.100873378141405	0.0829550335366374	1.21600069146924	0.223984658603654	0.718214926627424
Cetn2	210.962383581266	-0.343714216921423	0.168232558168719	-2.04308976016827	0.0410435533917635	0.455073108673011
Cetn3	253.236274692419	-0.35474451383281	0.153267726827044	-2.31454149661346	0.0206380377604812	0.386903361870725
Cfap157	37.9485342010951	0.210792160938986	0.276735219902223	0.761710638109106	0.446232724716019	NA
Cfap20	375.631440590012	0.0421486627393241	0.12540363606914	0.336103992360204	0.736792447914453	0.946483243213397
Cfap36	112.995933784798	-0.178135311662162	0.211905509471093	-0.840635583788169	0.400552117695035	0.837337859186443
Cfap43	199.410160216021	0.22168935902675	0.226167558918271	0.980199636442381	0.326987583957915	0.796948236524047
Cfap45	65.4137813185199	-0.316983458795993	0.235059977983015	-1.34852160506412	0.17749067604647	0.675841811103202
Cfap97	238.646740944353	-0.0473857371533657	0.127713312620453	-0.371032088833133	0.71061363142755	0.937778835505858
Cfdp1	384.231711331625	-0.29002652220676	0.16915300626718	-1.71458095015266	0.0864220838369098	0.561338788231935
Cfh	249.633263074524	0.195813191848614	0.25197478859733	0.777114222175356	0.437091383795008	0.854219978915453
Cfl1	9395.2183226123	-0.161988670494466	0.119549972925668	-1.35498709477069	0.175421668732773	0.673399433287697
Cfl2	321.202348491703	-0.00337027707258372	0.149865659529939	-0.0224886547268719	0.982058161929257	0.997201371986595
Cflar	2975.19370865768	-0.027851658458854	0.159323755282925	-0.174811712223299	0.86122758502827	0.973088961744008
Cfp	6735.41797199053	0.155821541470311	0.134021127346889	1.16266401092863	0.244965848746058	0.734125219998918
Cggbp1	1827.06922876398	-0.115671898644229	0.0813043195192747	-1.42270299202008	0.15482227290671	0.654318694416015
Cgnl1	2536.12325758234	0.0215119973095535	0.127671210459256	0.168495287482363	0.866193650715979	0.97363616329412
Cgrrf1	267.885050911386	0.138687445584576	0.120362330507417	1.15224958672622	0.249218526523128	0.736093381400618
CH25-588N10.2	34.8648390352143	-0.630164497006987	0.283697839289101	-2.22125236690583	0.0263338731284076	NA
Ch25h	34.6409454685596	0.170205686983628	0.326593612313849	0.52115436605681	0.602259240850184	NA
Chac1	47.3037342786975	-1.56732888889356	0.396375786647819	-3.95414892051955	7.68075612879382e-05	0.0685221830268826
Chac2	37.2407455616316	-0.326703505970609	0.30693976163301	-1.06438965167774	0.287152219722807	NA
Chaf1a	374.780166465787	-0.418227314440375	0.225239489584236	-1.85681167726126	0.0633379517862001	0.515707852926097
Chaf1b	660.501879102659	-0.138953999855915	0.131123823901884	-1.05971589083529	0.289273871205132	0.772243962926675
Champ1	374.79629139031	-0.0385548319187706	0.12029165333683	-0.320511281117842	0.748580779972462	0.949180279763378
Chchd1	189.811372969878	-0.119273647353353	0.137451611720225	-0.867750082087998	0.385531162415948	0.829196310672514
Chchd10	629.753961038271	-0.121792160486043	0.225527542256289	-0.540032313869846	0.58917474781779	0.898770948434017
Chchd2	1119.69771859795	-0.147634085778452	0.12165105618141	-1.21358655167198	0.224905645033873	0.718407000580758
Chchd3	1059.46475830271	-0.237449257779419	0.14373700893733	-1.65197021654282	0.0985406225218042	0.583651340627123
Chchd4	322.779368687633	-0.271654611713046	0.152476083098757	-1.78162113160461	0.0748110360445737	0.540161434909833
Chchd5	94.2811568004242	-0.135142305971868	0.188170884712958	-0.718189246854099	0.472640607302852	0.867310374465193
Chchd6	76.0504469797775	-0.0116730376585098	0.23390550632954	-0.0499049288821108	0.960198149519867	0.994504013733341
[truncated: 10,587 more rows]
