# Supplementary material for: Dissecting the phenotypic and functional heterogeneity of mouse inflammatory osteoclasts by the expression of Cx3cr1
Source: eLife. 2020 May 13;9:e54493. doi: 10.7554/eLife.54493 (PMC7220377; doi:10.7554/eLife.54493)
Supplement: Source data 4. — Statistics (Deseq) for the comparison of expressed genes in Cx3cr1+ versus Cx3cr1neg i-OCLs from WT Cx3cr1GFP/+ mice. In each group, the 4 i-OCL samples have been obtained from 4 different mice. [file elife-54493-data4.xlsx]

## Sheet: Cx3cxr1vsNeg_Deseq
Cx3cr1pos OCLs from GFP/+ mice versus Cx3cr1neg OCLs from GFP/+ mice _Deseq
Gene	baseMean	log2FoldChange	lfcSE	stat	pvalue	padj
0610007P14Rik	146.565545701998	0.26539295492681	0.180152929681749	1.47315370000168	0.140709596317239	0.227671672621812
0610009B22Rik	144.46468034433	-0.411525322544375	0.154610687786672	-2.66168741912712	0.00777500431706176	0.0192345728917399
0610009L18Rik	41.4421330735571	-0.348544287535159	0.261665558500645	-1.3320220266371	0.182852950591844	0.28073738967895
0610009O20Rik	302.356272483097	-0.624054111612474	0.125633117652054	-4.96727394237576	6.79006381660196e-07	4.32892366423179e-06
0610010F05Rik	475.725628401356	0.228332865338579	0.103187999612416	2.21278507380915	0.0269124668197917	0.0566282218570606
0610012G03Rik	747.472294104728	-0.656616493970004	0.182100435152714	-3.60579310762959	0.000311201008372436	0.00110665857314696
0610030E20Rik	259.13836953224	0.0306953272090851	0.153924113758692	0.199418573604435	0.841935332624253	0.890621497654394
0610037L13Rik	194.801838763595	0.0456980164927752	0.173455161983512	0.263457229927346	0.792198184936177	0.854531084033753
0610038B21Rik	134.11268619566	-0.252678584191881	0.206205919335176	-1.22537017854063	0.22043577765705	0.326067731759988
1110002J07Rik	181.389277258262	1.45467347467096	0.274716238622627	5.29518561394259	1.18895580606172e-07	8.98679208365573e-07
1110002L01Rik	47.9094519025154	-0.276590634882373	0.25749104778391	-1.07417573256563	0.282743926721086	0.397155128899084
1110004E09Rik	63.8005896025562	0.0791655652857493	0.2317355374366	0.341620306326163	0.732636653418902	0.809786780544254
1110004F10Rik	698.844168043516	-0.0267249807469595	0.125366469814729	-0.213174868738465	0.831190569584165	0.882702772397559
1110008F13Rik	521.85341683564	-0.362502456598306	0.114095001120831	-3.17719841392878	0.00148705261989616	0.00449652984656252
1110008L16Rik	148.180960013378	-0.338626198178387	0.174959076993046	-1.9354594457071	0.0529339406016594	0.10101109602396
1110008P14Rik	854.621664085418	-1.59296644766227	0.248102189800021	-6.42060615807649	1.35732776377279e-10	1.83677095775059e-09
1110012L19Rik	67.0932127706097	-0.304729244694826	0.250809827072117	-1.21498127984916	0.224373231348113	0.330764567941432
1110019D14Rik	37.8431064211187	-0.55463938458233	0.262404313350219	-2.11368242198854	0.0345424008382395	0.0702363566300261
1110032A03Rik	129.166285751271	-0.0339634265565463	0.195221361530402	-0.173973925242075	0.861885954354902	0.906092618457643
1110034G24Rik	52.9814897524819	0.614970308961049	0.258024698300447	2.38337768830552	0.0171545840403308	0.0382513182401777
1110037F02Rik	1123.43563726054	0.215066404443364	0.100507861116024	2.13979684827933	0.0323711880417115	0.0663936443130605
1110038B12Rik	223.353933036123	0.0730496789127857	0.1963233358246	0.372088619042467	0.709826869662839	0.791667064401527
1110038F14Rik	126.08784841946	0.149458186406375	0.171685794587989	0.870533213100388	0.384009076778851	0.503831758888849
1110046J04Rik	30.9006267143498	0.22975543982249	0.304225256238686	0.755214878156699	0.450120062977674	0.567725094465227
1110051M20Rik	138.943728316855	0.238607652288087	0.181511406298576	1.31456009930082	0.1886577873929	0.287336107266083
1110059E24Rik	182.253412514734	-0.278887503307925	0.169919088986279	-1.6412958954273	0.100736007726594	0.173713710227348
1110059G10Rik	97.982919452181	0.170578682410879	0.262218793640256	0.65052043006841	0.515356109425574	0.628403898568051
1110065P20Rik	36.8499229725036	-0.158812298942802	0.284807748116788	-0.557612284050922	0.577109166417141	0.683697529827706
1190002N15Rik	350.112912201913	1.2064698425586	0.13393944862212	9.00757659502082	2.10659915277384e-19	2.10409129663958e-17
1190007I07Rik	43.2705063006814	-0.93058005749612	0.27256066466935	-3.41421260703569	0.000639666387064033	0.00210407775253551
1500004A13Rik	59.6568903549281	-0.209452484817188	0.250922520957974	-0.834729716637384	0.403869906013315	0.522696705797776
1500011B03Rik	56.1784602025706	0.477784000548974	0.244189523562598	1.95661137946605	0.0503931761022884	0.0969425437553194
1500011K16Rik	140.548582391892	0.123756421920428	0.215375415138043	0.5746079321129	0.565556486278213	0.673370707645346
1500015A07Rik	62.8034914000072	-0.164126516074581	0.245168430128769	-0.669443924686293	0.503212339924163	0.617545324031749
1600002H07Rik	156.696843749303	0.0546590450429158	0.172562617895084	0.316749048604187	0.751434028163118	0.824193589370127
1600002K03Rik	68.3303403157301	-0.0803208527879004	0.212735519930395	-0.377562020739088	0.705755982833999	0.788454420236652
1600012H06Rik	382.122420312716	-0.512411206650045	0.132684195712964	-3.86188576489203	0.000112515177316786	0.000442639420610113
1600014C10Rik	166.904497975568	-0.410610575854567	0.174800465253905	-2.34902450206948	0.0188226681419278	0.0415716853851908
1600020E01Rik	111.136137144118	0.123143665741755	0.236123399340442	0.5215225008861	0.602002835134427	0.703977483754578
1700001K19Rik	47.7776530312118	1.01955189095091	0.435248026503116	2.34246183524881	0.0191569931331169	0.0422299454510906
1700003N22Rik	75.2176821113472	0.25450504253721	0.23655697274073	1.07587208099823	0.28198446972055	0.396466825095868
1700008B11Rik	46.6767703068743	0.0695979629069048	0.302869670804793	0.229795088831336	0.818251001160052	0.873055434472171
1700008J07Rik	44.0263346291397	-0.0492536129226425	0.263523487753953	-0.186904071976421	0.8517358464855	0.898307012898788
1700010I14Rik	34.4435566681581	-0.0921982772859044	0.307050136488067	-0.300271083870655	0.763970387861981	0.833584821505378
1700015E13Rik	31.2976623992491	-1.66599009915103	0.402426694005595	-4.13985981538259	3.47518121279572e-05	0.000154377534638313
1700017B05Rik	2118.60280322182	-0.0221506117884294	0.137350968893041	-0.161270153148163	0.871880629868179	0.91387345534632
1700020I14Rik	1754.30918863827	-0.520654214393804	0.142124128025882	-3.66337666676126	0.000248912093009636	0.000905625524870271
1700021F05Rik	135.202536338057	-1.06133567734514	0.24988839105418	-4.24723882877388	2.1642122123116e-05	0.000100504098494249
1700023H06Rik	102.439934229747	-0.57008251468807	0.301575454876069	-1.89034785646711	0.0587114522889938	0.110166039519455
1700025G04Rik	698.958050527061	-0.653389308015857	0.112194804522871	-5.82370378730562	5.75575538397917e-09	5.7352479419935e-08
1700025N23Rik	40.2481986526524	1.42584827111111	0.394118022744247	3.61782052285485	0.000297094293204348	0.00106099082859725
1700029I15Rik	38.3400855498276	0.287647359144075	0.324465624726996	0.886526452181492	0.375333906472616	0.494521019243844
1700030K09Rik	55.8582580723823	0.176520966665247	0.233725632606613	0.755248642164775	0.450099807676881	0.567725094465227
1700034J05Rik	122.4961788384	0.718121377169667	0.250442677989193	2.86740815477406	0.00413848905831731	0.0110602855805741
1700037C18Rik	35.858549012903	0.0530518613744039	0.289264646378471	0.183402507145623	0.854482208815062	0.90056599932481
1700037H04Rik	245.979089317154	0.811856996647025	0.16682696944319	4.86646133629784	1.13614137477197e-06	6.93757360577643e-06
1700052K11Rik	29.3074386122531	-0.0793219647176231	0.324805727847662	-0.244213564961595	0.807065421760997	0.864541377606642
1700056N10Rik	41.7838099827751	0.379918357778366	0.256172876654307	1.48305457915846	0.138059910377254	0.224249351070953
1700060J05Rik	36.4396279372344	-0.583712714516006	0.457131987945926	-1.27690192309415	0.201636875125936	0.303431791636961
1700066M21Rik	105.214045907687	0.29806150888293	0.216282643008947	1.37811108989731	0.16816899210366	0.262386159884027
1700071M16Rik	131.373146736275	1.19330679201699	0.301970186274339	3.95173711265945	7.75859453999819e-05	0.000318570676299762
1700088E04Rik	46.2959715899139	-0.634573669800613	0.379513521017712	-1.67207130881379	0.0945102614673899	0.164738454372175
1700099I09Rik	28.3612380212173	0.0734052283002248	0.326313116524674	0.224953348740654	0.822015566407219	0.875823763313639
1700101I11Rik	29.2363873157144	0.513401912334415	0.362853976660557	1.41489950602	0.157097962859596	0.248657761613383
1700109H08Rik	235.421785417295	0.387796880527939	0.19419306089335	1.99696569354203	0.0458289098735369	0.0894058023187819
1700112E06Rik	157.90196496505	1.03334106847966	0.335679006776275	3.07836071848354	0.00208142801539077	0.00604541231795356
1700123O20Rik	246.45393723828	-0.474216342810544	0.141719189075085	-3.34616889854835	0.000819364699813984	0.00263053692529566
1810011H11Rik	193.60927472197	1.39846398564177	0.223959923493313	6.2442599721799	4.25811264087213e-10	5.30577698865106e-09
1810013L24Rik	2030.53162233197	-0.277383721744324	0.115172230805646	-2.40842536264156	0.0160215018969706	0.0360698750220707
1810014B01Rik	38.0737886327883	-0.142985660103198	0.276424096868854	-0.51726915895844	0.604968280096466	0.706460592466737
1810022K09Rik	84.6462093055584	-0.0301553953220255	0.259039127736889	-0.116412511057615	0.907325620418974	0.938265647738109
1810026B05Rik	685.342223891913	0.199160549434639	0.187007761929122	1.06498547108501	0.28688250455696	0.401603595088914
1810026J23Rik	629.138297766904	-0.392153695311949	0.114944535676998	-3.41167757999325	0.000645644314806166	0.0021215231597482
1810030O07Rik	467.32577065825	0.161372910835554	0.111245002007033	1.45060818845014	0.146888993870456	0.23575385673847
1810032O08Rik	43.2837862316052	0.722390258784991	0.300920564650416	2.40060116736855	0.0163681655440178	0.0367320548094622
1810034E14Rik	60.0414260714366	-0.465414049826067	0.294088145759464	-1.58256650782086	0.113520302276165	0.191431462434079
1810037I17Rik	262.815209181799	-0.226787747231176	0.189653848281214	-1.19579828875869	0.231775283887539	0.339528803134057
1810043G02Rik	138.242013447956	1.06215896531141	0.179988861815764	5.90124830279016	3.60761474418136e-09	3.72757237730069e-08
1810043H04Rik	77.7809055584852	-0.00785846285082702	0.191825050171341	-0.0409668228618094	0.967322345167865	0.97896180327343
1810055G02Rik	86.3449262573314	0.40761401238727	0.223362298159925	1.8249006915904	0.0680160168471673	0.125070364117709
1810058I24Rik	697.915981141727	-0.532125941582992	0.137146199567022	-3.87999042819226	0.000104460575549886	0.000415629574231841
2010107E04Rik	530.786129150333	-0.776201439315406	0.153843325187429	-5.0454021217349	4.52568527728804e-07	3.00716732918004e-06
2010111I01Rik	1127.56355972875	0.383669822064953	0.150217618183923	2.55409336603378	0.0106464704048725	0.0252708091371786
2010315B03Rik	366.650301915219	-0.490099699925611	0.148454003194312	-3.30135725127006	0.000962182824373748	0.00304248011174463
2010320M18Rik	66.2243242367238	-0.677443978764634	0.243692141343961	-2.77991721451719	0.0054372757823924	0.0140769627075516
2210008F06Rik	66.8087933724789	-1.98023754548075	0.408954175030707	-4.84219911762011	1.28409989290319e-06	7.73224744123765e-06
2210013O21Rik	90.4882772129409	0.091127569055163	0.201738690249166	0.451710918429242	0.65147725151421	0.744397618115017
2210016F16Rik	545.666997918371	-0.110214860814255	0.1242720457966	-0.886883772676018	0.375141479101269	0.494513457516066
2210016L21Rik	235.687283258104	0.222018896518178	0.148531642885726	1.49475823605472	0.13497754958282	0.220523492340619
2210406H18Rik	88.5709298740715	0.900332951384472	0.233387231132811	3.85767870424809	0.000114468982693212	0.000449763392817382
2210408F21Rik	60.592560266591	0.215390566233173	0.276510100268798	0.778960934966898	0.436002727102976	0.554756275461627
2210408I21Rik	65.9092292482904	0.269125939728227	0.250973258202851	1.0723291463615	0.283572219912716	0.397992732458777
2300009A05Rik	84.8060104594993	-0.46555295428509	0.283943541293894	-1.63959691480787	0.101089005010035	0.17427467507552
2310001H17Rik	158.571386068538	0.239706436406442	0.206234937319149	1.1622979089886	0.245114475696399	0.354428899021464
2310009B15Rik	43.9162266375822	0.0903382890110243	0.30423044116998	0.296940334647677	0.766512061590095	0.835344154408672
2310011J03Rik	346.472813342295	-0.0385284109656251	0.13493594499316	-0.285531116023815	0.775237268999137	0.842651982512942
2310015A10Rik	77.9758561316716	0.451986605741249	0.30429333739277	1.48536477865055	0.137447220505325	0.223456048321859
2310022A10Rik	961.385779794957	0.384193551038357	0.116616609733772	3.2945011170831	0.000985965527842412	0.00310753222336508
2310022B05Rik	166.681302404841	0.161919010635855	0.147009713380938	1.10141708947003	0.270715171023087	0.383579196951762
2310033P09Rik	108.232069232168	-0.136875872993104	0.180107776349803	-0.759966480998941	0.447274620939369	0.564985557013145
2310035C23Rik	999.572119500969	-0.0737485354416737	0.0994179669391733	-0.74180289249724	0.458206767816176	0.576077140156501
2310036O22Rik	786.615905608152	0.328684591854271	0.106545257627899	3.084929345257	0.00203600513525088	0.00592579200442468
2310039H08Rik	67.2273697303313	-1.05694378876415	0.223815927306001	-4.72237968712161	2.33100987176535e-06	1.32921428346928e-05
2310043M15Rik	33.5151745683096	-0.0893556219153198	0.351560846337809	-0.2541682978811	0.799365541155542	0.85887606381307
2310043P16Rik	67.886772823687	0.571584248772115	0.306940032896815	1.86220169255102	0.0625746659615563	0.116339514127077
2310057M21Rik	343.925517869922	-0.332074005790081	0.112187331072463	-2.95999559500699	0.00307643441113512	0.00852232601015528
2310058D17Rik	82.0543650911599	-0.240034637856387	0.267906461919698	-0.895964345676496	0.370271805991712	0.489639025684986
2310061I04Rik	137.319737939739	-0.766395278902524	0.23567240855814	-3.25195165438069	0.00114615515349916	0.00355644475988249
2410002F23Rik	226.825016875187	0.187439206914501	0.195410255349532	0.959208648385559	0.337453644527114	0.455280244036635
2410004B18Rik	158.286493880207	0.0289697693813244	0.206815126070949	0.140075679819406	0.888600195816207	0.92567117493146
2410006H16Rik	254.429149760547	0.0746461405864258	0.223380806974372	0.334165417331444	0.738254738433587	0.813567065077644
2410015M20Rik	488.234112455496	-0.861577736897878	0.147244073119173	-5.85135767196927	4.87576420480339e-09	4.92467837218705e-08
2410016O06Rik	151.892708834295	-0.257300929520521	0.168921150140552	-1.52320138305021	0.127708330195325	0.210753912340437
2410022M11Rik	67.1197620735942	-0.273073414409986	0.266799472059558	-1.0235155725834	0.306064140811038	0.421978222185245
2410089E03Rik	401.809904564306	0.418038750850677	0.132895795068898	3.14561307702738	0.0016573911156954	0.00494037593345018
2410131K14Rik	750.188605182812	-0.976380027249532	0.127885527571314	-7.63479688274393	2.26176722020437e-14	7.20616214335999e-13
2500002B13Rik	84.3376018251217	-1.02940422800872	0.254548743616538	-4.04403578420114	5.25388950131642e-05	0.000224669382854459
2510002D24Rik	54.550720987532	-0.776893090750677	0.227087566171634	-3.42111681343002	0.000623645393630765	0.00205675505210775
2510009E07Rik	428.631201939977	0.608773071937569	0.118320534359697	5.14511766898285	2.67353177496833e-07	1.86613407587224e-06
2510016D11Rik	124.564056354567	-0.0739026418995483	0.195874200553898	-0.377296457065629	0.705953304824951	0.788534866532529
2510039O18Rik	1578.73319136805	-0.00578772580736952	0.106240238874628	-0.0544777183172518	0.956554560429427	0.970982347395091
2610001J05Rik	568.655469288723	0.150162954882037	0.118362543838001	1.26866954707868	0.204558948164599	0.306984779710408
2610002M06Rik	275.674033753153	0.0886138898347255	0.145428842136896	0.609328167182348	0.542306940521733	0.653040585669586
2610005L07Rik	57.0571102395801	0.023821197651074	0.289288189490044	0.0823441762108086	0.934373026138138	0.956645341193334
2610008E11Rik	103.892852110654	0.0308088773211665	0.17734576601738	0.173722091105052	0.862083875315919	0.906224989212399
2610012C04Rik	28.5890108612195	-0.182265779534974	0.3219423234668	-0.566144201148408	0.571295757822805	0.678406974164937
2610020C07Rik	102.178840927838	0.781104123509695	0.190907573523793	4.09153031014952	4.28535922134638e-05	0.000187066409298107
2610020H08Rik	95.924441385186	0.653477813044986	0.223435216253067	2.92468583960751	0.00344804128179529	0.00942110280751059
2610021A01Rik	129.127395611492	-0.088784035424444	0.184567075973224	-0.481039399666951	0.630488496719454	0.727553432167094
2610024D14Rik	117.093081863343	1.21500815840118	0.248021235070325	4.89880698342897	9.64203035749193e-07	5.9864307868296e-06
2610037D02Rik	90.4516993562097	0.311365230065828	0.26017691854564	1.19674424544009	0.231406255722979	0.339067147313272
2610044O15Rik8	69.647096689903	0.0226570622690806	0.222143529314869	0.101992897740299	0.918762312468187	0.945312994209447
2610301B20Rik	97.8231343087617	-0.123581262106202	0.179462905762244	-0.688617302730657	0.491064129581661	0.606243091110967
2610306O10Rik	54.2849487401341	0.297698632944547	0.384590802310975	0.774065919298381	0.438891810177734	0.557361597486053
2610318N02Rik	35.2774199928596	1.4202708296	0.355174004115692	3.99880287730002	6.36636743877023e-05	0.000267872732253171
2610507B11Rik	9452.08872719669	-0.0384478191051213	0.1027509658129	-0.374184503288575	0.708267052545352	0.790487837556159
2610507I01Rik	73.7026367319547	-0.584186080301359	0.238276696978724	-2.45171301981545	0.0142178003601382	0.0325565897984606
2610524H06Rik	29.9452625244726	0.509609700451041	0.356421492672806	1.42979509072104	0.152775838518249	0.243254545515203
2700038G22Rik	55.1933318193039	0.143612671314608	0.302850769905085	0.474202761180424	0.635355324559904	0.731580229564125
2700049A03Rik	216.120790586077	-0.178316695831565	0.163263109554635	-1.09220445646291	0.274743244130299	0.388193974107984
2700060E02Rik	442.90864063965	-0.00516736967034721	0.15395314727179	-0.0335645601400061	0.973224383246223	0.982120829376451
2700062C07Rik	73.3083430318903	-0.443226687162146	0.203057923962909	-2.18275986729337	0.0290534985717014	0.0605027985954718
2700081O15Rik	68.9353633533996	0.394516932613963	0.239506861040414	1.64720514017923	0.0995158876528277	0.171986740745789
2700094K13Rik	210.393788691838	0.544301878647202	0.206826377766282	2.63168501293522	0.00849625931594811	0.0208147602669276
2700097O09Rik	50.5474576165391	-0.00356603583670897	0.297105195470558	-0.0120026034248948	0.990423537973215	0.994215350023972
2700099C18Rik	46.8585516883462	-0.205018166419807	0.389494378424689	-0.526370026825556	0.598631136873077	0.700685719637991
2810002D19Rik	47.1574176807771	-0.0283328507138938	0.251464583244353	-0.112671336648478	0.910291126553532	0.939710756105012
2810004N23Rik	223.998570498022	-0.209367478455695	0.124916156509549	-1.67606404412299	0.093725648651354	0.163642798040689
2810006K23Rik	95.7022189207028	-0.382284268683607	0.188358113830554	-2.02956093002453	0.0424011896780346	0.0837049367996966
2810013P06Rik	190.63212537705	0.199719201785289	0.228537324214211	0.873901899709343	0.382171680066602	0.5018919538389
2810021J22Rik	64.2907999583227	-0.199451921555922	0.216143967450246	-0.92277348245601	0.356125262644929	0.474821107149743
2810025M15Rik	323.532627148881	-2.03428405496383	0.291882336928936	-6.9695346294939	3.1799109614035e-12	6.30223298413591e-11
2810402E24Rik	50.6792838103653	-0.217722704135264	0.253536640792317	-0.858742560660533	0.390482563692767	0.51014627676231
2810403A07Rik	672.621435800291	-0.0660031526498407	0.110056887562479	-0.599718510232911	0.548693849972403	0.658778105504931
2810403D21Rik	28.0961012111614	0.172651807052057	0.352980647148226	0.489125419330868	0.62475290630201	0.722989915017084
2810405F17Rik	32.4616142131794	0.445121062892341	0.351215106530131	1.26737447967419	0.205021420527468	0.307458839053645
2810417H13Rik	445.891054223431	1.0596523004347	0.216952751882817	4.8842537890787	1.03821281782445e-06	6.41111966237794e-06
2810428I15Rik	239.179683516016	0.136376438384242	0.140604329786684	0.969930574621308	0.332081098740577	0.449380712650555
2810455O05Rik	30.6283066007782	0.703312108524728	0.324215585451271	2.16927297787304	0.0300619654937345	0.0622355380389289
2810474O19Rik	4315.65639352954	0.274501737906194	0.170241740477102	1.6124232349652	0.106869872133392	0.182268239707106
2900026A02Rik	75.199406598675	0.437535276164924	0.240173556987042	1.82174624739613	0.068493497177823	0.125746267247688
2900076A07Rik	28.3214691980299	-0.253307158156356	0.339795895071326	-0.745468564601655	0.455988507933738	0.573689430405488
2900089D17Rik	85.117200667242	1.08373333005704	0.256292017359536	4.22850988970422	2.35244177541275e-05	0.000108564282154637
2900093K20Rik	31.4320630009815	0.0311781550784508	0.352586688909728	0.0884269204117153	0.929537365704139	0.953633956744648
2900097C17Rik	679.124568621407	0.169421329208684	0.118300278344182	1.43212959073326	0.152106737334728	0.242373169075406
3010003L21Rik	32.0035083565684	-0.533355062450579	0.31186854532739	-1.7101919075894	0.0872303916516071	0.154011571118894
3010026O09Rik	114.275946450435	0.693797475796461	0.257222807252585	2.69726266969466	0.00699120996247842	0.0175792961793788
3110001I22Rik	89.3730052225381	-0.0982233331294153	0.188018236756399	-0.522413861675959	0.601382206739764	0.703513206155412
3110002H16Rik	745.79193917034	0.00623721813373063	0.109600986796569	0.0569084121962109	0.954618153211313	0.969798955292572
3110040N11Rik	77.9953956707162	-0.227105967156577	0.211158546833773	-1.07552344227562	0.282140442580621	0.39659750585023
3110043O21Rik	1698.21203022518	-0.691316751808032	0.13014552217364	-5.31187504773064	1.08502992799299e-07	8.2668689243991e-07
3110056K07Rik	58.7854013195302	-0.0311096922976309	0.230743768569746	-0.13482354254012	0.892751391529664	0.928956528206821
3110062M04Rik	181.522206687619	-0.64708121861078	0.157113282130867	-4.11856470589033	3.81239525153083e-05	0.000168229292568427
3110082I17Rik	202.009708135594	0.0151587235196435	0.172085648488698	0.0880882493849514	0.929806535705594	0.953832348537243
3830406C13Rik	295.106853748665	-0.355313884014957	0.157140595625986	-2.26112089367821	0.023751771898231	0.0509573899316804
4632404H12Rik	91.3281460333531	-0.0318647563352601	0.217802004300172	-0.146301483485636	0.883683394807685	0.922369112576747
4632415L05Rik	118.076809877058	-0.219982232244489	0.19811152786337	-1.11039592000018	0.266828455582301	0.37900601915397
4632427E13Rik	325.581263084267	0.159861781445359	0.198802058095744	0.804125384699833	0.421324565557235	0.540341348979701
4732440D04Rik	76.4868892154015	-0.128419204952565	0.242199424442134	-0.53022093363086	0.595958758642253	0.698467217127282
4732487G21Rik	74.3110411781749	0.0610845750143618	0.231841062696897	0.263476082725786	0.792183655703464	0.854531084033753
4833418N02Rik	130.301938502043	-0.0840131312849711	0.24352031471047	-0.344994344249503	0.730098622648593	0.807904959158356
4833420G17Rik	625.668060089813	0.0271393726180656	0.27906200172845	0.0972521247965332	0.922526174583398	0.948218875133295
4833421G17Rik	32.1009387787347	0.00293190207408174	0.357041980825514	0.00821164521690955	0.993448128696053	0.995742648904096
4833439L19Rik	689.74562234671	-0.0454499345167443	0.0928305318886415	-0.489601142986723	0.624416167500399	0.722666679050259
4833445I07Rik	88.0084702856582	1.13806544251443	0.24440368558385	4.65649869311805	3.21632320474853e-06	1.78314658730221e-05
4921511C10Rik	38.545979617901	-0.425840248459556	0.29573367329421	-1.43994508206006	0.149882937062772	0.239496795700227
4921524J17Rik	85.3034702171518	-0.277502359765659	0.208653749145061	-1.32996584486355	0.183529524971078	0.281360570814321
4921531C22Rik	117.873275815312	0.0498963679853792	0.291353985707444	0.171256857407406	0.864021802037998	0.907579866342392
4930402H24Rik	635.661170094972	0.454298493262482	0.125118830949772	3.63093620531714	0.000282394986996057	0.00101425254319217
4930404N11Rik	120.321158080503	-0.201871788038915	0.23412308872818	-0.862246389860722	0.388551946827309	0.508202686637049
4930405O22Rik	60.4183290138209	0.104351468455982	0.24667799657746	0.423027063231458	0.672275515778574	0.760638979238817
4930412M03Rik	61.6369573595865	-0.0710653209719362	0.255945922083918	-0.277657562946581	0.781275239916887	0.846959160509434
4930413G21Rik	33.6863075678491	-0.184720677510604	0.304113387626447	-0.607407253433718	0.543580675992226	0.654074271666714
4930427A07Rik	114.371807599583	1.12565811403012	0.253052208504546	4.44832361148863	8.65430758006052e-06	4.38994199496419e-05
4930430E12Rik	317.892815927305	0.203664546630413	0.198525597986526	1.0258855719162	0.304945524257984	0.420931538168571
4930430F08Rik	75.1381798691328	-0.447406359062499	0.202324092698473	-2.21133505701309	0.0270126434110089	0.0568200095817395
4930444A19Rik	28.0113535461355	1.3718234553887	0.352957281948062	3.88665576700175	0.000101634718676827	0.000405926034448706
4930453N24Rik	350.486751252728	0.189335613614563	0.175443349887536	1.07918375781089	0.280505818753345	0.39467999483511
4930469K13Rik	46.8874344232341	0.00872490548193361	0.248275959570694	0.0351419666125559	0.97196653754625	0.981323616126719
4930503L19Rik	229.080661860507	0.622946095954894	0.202057670944735	3.08301136523183	0.00204917328764381	0.00595585353926035
4930513N10Rik	37.3124821451779	0.267711292534832	0.270275116365648	0.990514021914811	0.321922938956345	0.438862452200977
4930513N20Rik	29.0775830524507	-0.454556946193243	0.320150855041249	-1.4198211219354	0.155659764126977	0.246815941985385
4930517G19Rik	120.413997834214	0.673656288485603	0.256088017447504	2.63056544074225	0.00852429563834033	0.0208631389748178
4930523C07Rik	552.710289301174	-0.911153237678003	0.21727294065572	-4.19358818879233	2.74576259249896e-05	0.000125428029860615
4930533B01Rik	54.4073760150194	-0.308953625150401	0.266952193724464	-1.15733690306096	0.247134741970994	0.356591461557551
4930551O13Rik	41.9421898250779	0.846892348891135	0.326695367061403	2.59229984345618	0.00953366392621377	0.022945335726028
4930556M19Rik	59.527465036986	-1.4880276379434	0.288913083320459	-5.15043355199287	2.59884996252158e-07	1.81803928728928e-06
4930565N06Rik	121.212141901126	-0.342893681888418	0.180120893998851	-1.9036863202034	0.0569510491021125	0.107391212608643
4930577N17Rik	87.1607635588643	0.436021151892655	0.182008453092022	2.39560934937569	0.016592764100344	0.0371697999649038
4930579G18Rik	75.574367755321	0.261306838169628	0.194232609418801	1.3453293911436	0.178518886162722	0.275519963771683
4930579G24Rik	60.7112293601911	0.41297243879736	0.277359397229556	1.48894338148408	0.136502278648715	0.222178113915427
4930589L23Rik	35.6783897089767	0.62539580742964	0.383990594791689	1.62867480587359	0.103381878941269	0.177401274403582
4930594C11Rik	32.2599084362273	0.28200905479062	0.368721017819434	0.764830430492906	0.444372524770088	0.562279129723663
4930595D18Rik	119.770367816916	0.701171753989985	0.182740240801222	3.83698604596179	0.000124553546449482	0.0004846958509792
4930596I21Rik	58.6762647433355	0.682093459368179	0.300324439239583	2.27118865549281	0.0231355598861966	0.0498222144366503
4930599N24Rik	37.7068310192101	-0.0633665678439992	0.270551586597167	-0.234212516145203	0.814819998748289	0.870871310764095
4931406C07Rik	402.557266141829	-0.227735793290255	0.120397876014063	-1.89152666832473	0.0585540744957461	0.109911492745918
4931406P16Rik	458.06439864371	-0.159280470234413	0.12217190919415	-1.30374053483352	0.192322063765018	0.291998211181416
4931413K12Rik	93.9255983380083	0.0943650582925427	0.274614257633035	0.343627672888864	0.731126310693888	0.808773997862105
4931414P19Rik	53.4807000967156	-0.227063669982189	0.235837651154213	-0.962796520703614	0.335649647127249	0.453527035548253
4931422A03Rik	49.1394885821607	0.893203174062947	0.290233219351103	3.07753597627437	0.00208719642687579	0.00605797210152949
4931428F04Rik	47.3055969447064	-0.279983851135999	0.245431619032796	-1.14078150256013	0.253960860007671	0.364518410492306
4931440P22Rik	219.34201365039	0.286708284291828	0.202459424611149	1.41612713185612	0.156738285609829	0.248150877393345
4932438A13Rik	2839.01757546236	0.138485921257188	0.0836865566852431	1.65481681577667	0.0979616618895785	0.169977597529346
4932441J04Rik	65.2440664565921	-0.556164619667211	0.237956154466129	-2.33725671401525	0.0194258398143928	0.0427402437175059
4932442E05Rik	115.357228403629	0.0574857631015926	0.22271336894079	0.258115457437472	0.796317802379919	0.856918302090746
4933400F21Rik	192.012583443794	-1.04693744306458	0.200901576762133	-5.21119575036563	1.8762734886676e-07	1.36019019901393e-06
4933406P04Rik	27.9651680610366	-0.0265403873674482	0.359662287917044	-0.0737925222050795	0.941175477219949	0.960718093990839
4933421O10Rik	93.7930657762347	0.350116954359155	0.2829435285191	1.23740930280906	0.215935166857487	0.320616337293709
4933423P22Rik	580.20439606673	0.0909092976630019	0.175554320014747	0.517841416009387	0.60456891933208	0.706125276082991
4933427D14Rik	132.710179636161	0.126370977678689	0.200470753328467	0.63037114182752	0.528451787161498	0.6400929491268
4933433G15Rik	51.1859717980382	0.34397423822535	0.278557924411593	1.23483917735221	0.216890363489626	0.321920653911657
4933434E20Rik	533.700932679235	-0.172386520191229	0.105375242371629	-1.63592999941361	0.101854238585594	0.175305742970419
4933439C10Rik	116.154089017434	-0.249321664129741	0.190509619078392	-1.30870905803002	0.19063292225648	0.289818232253902
4933439K11Rik	46.4216131452726	-0.600017328190099	0.300006597653867	-2.00001377597158	0.0454987763608099	0.0889409910687779
4933440N22Rik	83.8475382712476	0.662262772766855	0.257790238644971	2.56899864109643	0.0101992857420971	0.024310229368237
5031414D18Rik	38.6889923220874	1.8616137321163	0.43711086464452	4.25890519475021	2.05430568533107e-05	9.59311207788182e-05
5031425E22Rik	334.347038097997	0.22486474049403	0.171756606868418	1.30920576852277	0.19046465874915	0.289597406108258
5031434O11Rik	69.3421451484811	0.359949237963783	0.229413288918058	1.56899907438383	0.116648154694476	0.195628784700598
5031439G07Rik	9264.80515623203	-0.296673008294004	0.149743460584131	-1.98120844233678	0.0475679028631955	0.0921602548968155
5330406M23Rik	563.438577574447	0.829180376146537	0.133582359292402	6.20725955536928	5.39165099611638e-10	6.56227541451882e-09
5330438D12Rik	33.7695589061927	-0.533219633672102	0.31146175068554	-1.71199074203643	0.0868983745922939	0.153533068123546
5430427O19Rik	161.368961441075	1.45917824820808	0.192803853259658	7.5682006533497	3.78429158798559e-14	1.13664223472073e-12
5430434F05Rik	139.380622659607	0.377356394057981	0.225593441671073	1.67272767888433	0.0943809177408075	0.164581384199537
5530601H04Rik	100.232185673787	0.441185968013592	0.196179177762876	2.2488929408546	0.0245193082359285	0.052380834179114
5730409E04Rik	148.6035135947	0.609608967150517	0.170752099362786	3.5701403931516	0.000356789953218785	0.00125075252402741
5730455P16Rik	231.935456530313	-0.188842263746831	0.137962274919832	-1.36879638913293	0.171062929928724	0.266340093177408
5730480H06Rik	120.185138777324	-0.0867560814991368	0.174041685809986	-0.49847874717701	0.618146645262907	0.71765456924665
5730507A11Rik	37.611560097532	-0.167839464084287	0.339470756143734	-0.494415088919243	0.621013059845106	0.720024922197988
5730508B09Rik	361.30382514286	-0.898437252441588	0.208156448224347	-4.31616344391728	1.58764443196487e-05	7.59137734661013e-05
5830417I10Rik	112.876263243009	0.00615651426381286	0.177177143571486	0.0347477904864681	0.972280852618792	0.981493971122282
5830432E09Rik	330.714025037002	-0.596332145182123	0.257474659335455	-2.31608091732702	0.0205538510100984	0.044908023430918
5930403N24Rik	46.560272891453	1.02834010107206	0.397878700433034	2.58455680073564	0.00975042426264424	0.023411628346538
5930420M18Rik	48.5697366560792	-0.151659583050565	0.295752432198372	-0.51279234433765	0.608096585544683	0.708995324168968
6030400A10Rik	165.097838005213	0.530385899051174	0.16137814534767	3.28660301497777	0.00101403676634121	0.00318404508592918
6030458C11Rik	372.087988376614	-0.357404968106569	0.124347735974756	-2.87423784039885	0.00405003844958967	0.0108515507532651
6230400D17Rik	45.903255622877	0.177267655078803	0.270877087989439	0.654421001032446	0.512840607869793	0.626003787588879
6330403L08Rik	205.176503351363	0.172494835787762	0.176869116623156	0.975268260966588	0.329427209877303	0.446509578492823
6330408A02Rik	43.3237482596595	-0.483896865494437	0.331582656560027	-1.45935517410524	0.144467376852748	0.232573556891925
6330549D23Rik	65.837751816604	-0.139953325487912	0.21361979580687	-0.655151480504371	0.512370229575001	0.625611656078527
6430511E19Rik	75.4638098592008	0.264583070633187	0.260399843893125	1.01606462844801	0.3095986115546	0.425592411405204
6430548M08Rik	856.997648857808	0.242126163346994	0.125138205215511	1.93487003373597	0.0530062462885523	0.1011192374627
6430573P05Rik	47.5032116466524	-0.589864400913298	0.26498518432879	-2.22602785286819	0.0260123158311372	0.0550470816772931
6430590A07Rik	31.2594574687786	-0.417746786041779	0.350317560913283	-1.19248028832099	0.233072975296091	0.340953550401175
6530402F18Rik	39.8622693516085	1.35960688303531	0.350493614552804	3.87912026520094	0.000104834917642709	0.000416855430816269
6530409C15Rik	50.6193292812699	-0.541329744706155	0.232504492118818	-2.32825499315306	0.0198985676169747	0.0436810524087959
6720427I07Rik	94.1759375147867	0.0538098489691988	0.213412241025477	0.252140405398653	0.800932539633228	0.859898994308494
6720475M21Rik	45.1577674027466	-0.65008732982187	0.263009491148374	-2.47172574260877	0.0134462627501362	0.0310607497642643
6820402A03Rik	44.5116511146706	0.506431562819319	0.294306388632463	1.7207630631891	0.0852938275631795	0.151143736958971
6820431F20Rik	70.2923516914523	0.336962570582448	0.210132473099774	1.60357209721913	0.108808405297089	0.184847972551818
8030453O22Rik	41.4032254354127	-0.53945969536218	0.30438135587164	-1.77231517290985	0.076342253957949	0.137645740123322
8030462N17Rik	340.049531776287	-0.271127355277803	0.113289390748327	-2.39322811683324	0.0167008539409199	0.0373587356641446
8430408G22Rik	61.0914599090802	1.50427250438489	0.249266106211174	6.03480564305238	1.59154124765528e-09	1.78675705635519e-08
9030617O03Rik	1247.92216642638	-0.29288877516446	0.0990435670112271	-2.95717111169128	0.00310475769520324	0.00859133148507757
9030624J02Rik	1653.79858246422	0.23591071278711	0.104243501328548	2.26307357082704	0.0236311544485721	0.05074929307646
9130008F23Rik	61.9215785273604	0.567894129700147	0.26933467772346	2.10850728357836	0.0349871334058045	0.0709093091598173
9130011E15Rik	414.518394747887	-0.37519168780167	0.106956243413768	-3.50789889235556	0.000451660672036328	0.00154209157829007
9130019O22Rik	40.0534223129188	0.719635636901349	0.309415331382011	2.32579178829658	0.0200296609324179	0.0439305128676332
9130023H24Rik	58.585657916543	-0.899563638465589	0.235686656618758	-3.81677796855808	0.000135205736734758	0.00052200467610297
9130230L23Rik	88.6273632623007	0.973346941144302	0.361209537868744	2.69468781718049	0.00704546070382606	0.0176839096445255
9130230N09Rik	87.4891165082287	0.517942587483264	0.262501988795101	1.97309967006593	0.0484842078712464	0.0937430874265842
9130401M01Rik	51.6019868866147	0.641605117460207	0.270328422774088	2.37342825765825	0.0176238164135155	0.0391865246579669
9230112E08Rik	104.551274516587	-0.0408117118425635	0.212256252125445	-0.192275664127168	0.847526279941352	0.8951089487296
9330020H09Rik	30.4996707292587	0.315996473475151	0.373767471326135	0.845435993544299	0.397867455309141	0.517332424193589
9330151L19Rik	36.5851120051826	-0.803497455996569	0.270935156247023	-2.96564486915086	0.00302049050723689	0.00840249182881879
9330159M07Rik	48.7496348075323	0.535257283420305	0.278984275646685	1.91859301811752	0.0550358598878572	0.104279779688149
9330160F10Rik	39.3036604750683	0.213181663353037	0.292836624702088	0.727988391376636	0.466620692502804	0.583784118758977
9330162G02Rik	848.07498526152	0.196949112814831	0.167340008963006	1.17693977689682	0.239219544246299	0.347842630195226
9330175E14Rik	29.8660514377323	1.33446054669582	0.461935732727416	2.88884459926218	0.00386660107859281	0.0104110343547477
9330182L06Rik	41.3680783272443	-1.9871997137591	0.347569587048749	-5.71741541206935	1.08156484159126e-08	1.01552217153896e-07
9430015G10Rik	134.066754746813	0.277410785512838	0.206374029924682	1.34421363780163	0.178879312851065	0.275983345866207
9430016H08Rik	147.504715031011	-0.0424891190208303	0.163147530873213	-0.260433723963926	0.794529232230729	0.855642697013158
9430018G01Rik	35.3933301514785	-0.834155951114725	0.333077650555563	-2.50438884063034	0.0122663142999272	0.0286309391595087
9430020K01Rik	79.5009503462584	-1.2179751148315	0.301749826713718	-4.03637386670992	5.42836884408263e-05	0.00023157973526366
9430025C20Rik	33.3204091569999	0.0665793456942194	0.302433222337062	0.220145608275855	0.825757755700412	0.878606810575726
9430034N14Rik	240.880541007554	0.45780665735727	0.20353669385514	2.24925859158888	0.0244960486727094	0.0523578078373043
9430038I01Rik	188.562313525045	-0.113871334060214	0.162585591847822	-0.700377768817275	0.483691416043886	0.599493447992151
9430053O09Rik	45.4956152916386	0.237108399866596	0.289571794726519	0.818824223162097	0.412886708537544	0.53190492649657
9430076C15Rik	2019.38726826648	1.34744692921253	0.152522890253593	8.83439152623054	1.00644568838169e-18	8.67542396457781e-17
9430091E24Rik	58.9087571567731	-0.455368830013361	0.2155254438372	-2.11283095817369	0.0346152389139434	0.0703427711500044
9430092D12Rik	37.9869244955544	0.462655648820603	0.361206722390205	1.2808611250618	0.200242449534911	0.301694149095757
9530003O04Rik	29.4473886860582	0.295093028688179	0.38210596224704	0.772280618059017	0.439948242296314	0.558365130022096
9530068E07Rik	1941.50718049992	0.0596034997037614	0.097619180568965	0.610571604436418	0.541483226030916	0.652486250440356
9530082P21Rik	103.105124964521	0.148411258161346	0.189402601488749	0.783575605587242	0.433289174390226	0.552364694053991
9530085L11Rik	33.9007191243977	-0.311314806735433	0.334887894464556	-0.929609018066139	0.352573556527479	0.470833850689551
9630010A21Rik	70.2997477326743	1.37830513211675	0.251690793305201	5.47618414649523	4.34595432725456e-08	3.58883433126631e-07
9830144P21Rik	212.108513262643	0.634130041840431	0.210370483424853	3.01434893107022	0.00257531429799569	0.00730620614072944
9930014A18Rik	37.5457597907833	-0.507585481231318	0.429017537857148	-1.183134572462	0.236755818038123	0.345017597268385
9930021J03Rik	573.232059892321	-0.255103503120748	0.114915982714899	-2.21991316694083	0.0264246625432634	0.055807078051178
9930022D16Rik	52.7890816816604	1.20638612486777	0.294017600678938	4.10310852847588	4.076359130468e-05	0.000178811361648448
9930104L06Rik	91.4518395123603	0.26647343402274	0.235052649426296	1.13367551768991	0.256930682816593	0.367816248805235
9930111J21Rik1	126.544468884744	1.33259029985476	0.237600720899095	5.60852801629624	2.04054670357781e-08	1.79708049436856e-07
9930111J21Rik2	314.425666569049	1.18738459297238	0.230530281871108	5.15066646921578	2.59562426408876e-07	1.81679262311218e-06
9930120I10Rik	40.8556521682216	1.2285730836613	0.36342346140265	3.38055523140846	0.000723395347428854	0.00235487078308125
A130010J15Rik	61.9677735406499	0.0577458866738672	0.208043098493017	0.277566942100728	0.781344811670003	0.846961624019551
A130048G24Rik	111.529075922815	0.752674163070685	0.25853553551541	2.91129867919383	0.00359929772510051	0.00976863529661203
A130050O07Rik	34.727727893293	-0.297893876873974	0.284545757751746	-1.04691027280706	0.295140963460086	0.410425306645876
A130051J06Rik	113.838523829437	0.799978652130066	0.190392219987815	4.2017402401278	2.64870958502415e-05	0.000121258676346049
A130071D04Rik	880.94400523742	1.26918315130496	0.186571943714864	6.80264741865283	1.02713819845067e-11	1.80035295647656e-10
A230046K03Rik	1362.54404212406	0.453977570911232	0.0971970941100148	4.67069077597512	3.00188541537365e-06	1.67384705150542e-05
A230050P20Rik	182.802444993813	-1.14968876043477	0.149951465654965	-7.66707251184976	1.7596631018054e-14	5.73713993166346e-13
A330023F24Rik	183.051596541601	1.13321540943332	0.163398179458004	6.93530009448225	4.05359734987908e-12	7.80038572602877e-11
A330074K22Rik	85.7559233731981	-0.319860216099097	0.249260117092425	-1.2832386497696	0.199408479035977	0.300545593852427
A430005L14Rik	205.382628997887	-0.269142233764959	0.140646194708644	-1.91361191337242	0.0556697616932011	0.105306470901689
A430027C01Rik	54.4603777454006	0.19361276493044	0.233002272962462	0.830947966596156	0.406003024683092	0.524917615126024
A430033K04Rik	44.4229440398444	-0.560527421129977	0.352914067677522	-1.58828301976946	0.112222355403102	0.189735621018038
A430057M04Rik	33.8131557928432	0.28910838378591	0.306781826260057	0.942390842737972	0.345992573809927	0.46376787106166
A430110C17Rik	180.647115365907	-0.304225941371555	0.232364580294754	-1.30926125223407	0.190445870118341	0.289597406108258
A4galt	29.6242325276526	-0.106109248987044	0.31241531688527	-0.339641634875447	0.734126419938012	0.810721393025613
A530013C23Rik	120.771759479232	1.11016970257893	0.229389173493589	4.83967785258164	1.30049762788099e-06	7.81880940569833e-06
A530017D24Rik	128.494625968708	-0.16141197062534	0.192961654591206	-0.836497650102016	0.402874998179534	0.521623647334304
A530041M06Rik	35.7716639596401	-0.094789819468299	0.350072325068664	-0.270772102449706	0.786566317607112	0.85078960954753
A530064D06Rik	52.8620777539757	0.678298223116875	0.263479212510787	2.57438989836477	0.010041704108356	0.0239937053737726
A630001G21Rik	207.869023293622	0.880860358810991	0.193317011795598	4.55655894237783	5.19984521712888e-06	2.77641290019376e-05
A630033H20Rik	560.006731749785	0.260429730002817	0.163570270440456	1.59215809389776	0.111349186539976	0.188426719457522
A630081D01Rik	766.751279826242	0.380359907860056	0.162271204384453	2.343976611888	0.019079367772487	0.0420956948486587
A730017L22Rik	56.9676549493248	-0.00694745343310755	0.252230718382529	-0.0275440417315514	0.978025812937005	0.985664041251279
A830010M20Rik	50.8855662636034	0.555468522258748	0.274407442204315	2.02424729372014	0.0429447136692924	0.0847125330808851
A830080D01Rik	222.07133484919	-0.451581926932741	0.154553652563469	-2.921845711458	0.00347963866285721	0.00949506777364656
A930004J17Rik	244.444165849072	0.196139898263387	0.163511292432657	1.19954955615171	0.230314327554141	0.337860567929696
A930006L05Rik	65.5250680696187	0.016145999735146	0.221723097906352	0.0728205581087699	0.941948911382122	0.961351638126998
A930007I19Rik	72.7634428102913	0.90842366418432	0.301544315691132	3.01257101166784	0.00259044821367594	0.00734582937564482
A930011G23Rik	5272.2322009374	0.978411172024188	0.12479441776236	7.84018379642052	4.49887440443842e-15	1.71052369727666e-13
A930033H14Rik	35.2258485429989	-0.339623490422041	0.330154216307595	-1.02868136660603	0.303629428764147	0.419356492646707
AA414768	38.4216983779899	1.58315772470617	0.285166416721021	5.55169764697425	2.8290860678501e-08	2.42204409278188e-07
AA415398	43.2750925538923	-0.200137281535054	0.249012169024314	-0.803724903562892	0.421555868315202	0.54048941801269
AA474408	42.5539756638144	0.449233569055717	0.288238001395183	1.55855080482536	0.119102734439111	0.198767791130647
Aaas	210.747092901968	0.594936059547162	0.183547793006849	3.24131415475512	0.00118979984930692	0.00368469002055931
Aacs	437.962616463444	0.211138554059926	0.148812969124159	1.41881823407318	0.155952015265195	0.247154780520399
Aaed1	276.221368510444	-0.245984531919057	0.14973531407466	-1.64279571214847	0.100425207673532	0.173320246649946
Aagab	1445.74779124386	-0.872080999806977	0.120055386973309	-7.26398891205826	3.75838830387317e-13	9.04384642528563e-12
Aak1	2071.28872659237	-0.237229557761883	0.128171724090267	-1.85087279932983	0.0641878547648352	0.11891714297298
Aamdc	70.3879174807716	-0.30416265857574	0.211747621218664	-1.43643955396147	0.150877304785675	0.24074944601594
Aamp	1026.47015147071	0.0396490551692218	0.101466244335343	0.390761040077356	0.695973875317902	0.78015776439617
Aanat	42.6676729157427	1.39119576817611	0.305125855050394	4.55941620531091	5.12960193183215e-06	2.74239763432912e-05
Aar2	454.577965521557	0.131725743602436	0.111479332910194	1.18161582208741	0.23735817262447	0.345584227346772
Aars	2214.67978530495	0.00869268079393255	0.154355430960952	0.0563160022282053	0.955090071130534	0.970121755058739
Aars2	138.10978954105	0.0049387941733768	0.167940079982658	0.0294080732478321	0.9765391340701	0.984360833181595
Aasdh	106.118926740732	-0.218364874265611	0.171213859793552	-1.27539250927999	0.202170348680724	0.30408914045021
Aasdhppt	159.812069555863	-0.265942043412794	0.15109154803287	-1.76013845165541	0.0783843345797993	0.140722803236344
Aatf	257.106099377009	0.0501463771932563	0.142687217293494	0.351442674014099	0.725256272329911	0.804030143346717
Aatk	306.36699597704	1.37626659733654	0.206111010115204	6.67730751776576	2.43371933868382e-11	3.89673764342696e-10
AB124611	911.977526673854	1.20373452210913	0.185185797388105	6.5001449305877	8.02426680321027e-11	1.13339391378677e-09
Abca1	5185.20868263863	0.674450592921988	0.141425036113785	4.76896178678966	1.85177778829147e-06	1.07841848522204e-05
Abca2	1953.59721045422	-0.989495807640961	0.193456755817498	-5.11481650490628	3.14046094075051e-07	2.15382566426949e-06
Abca3	1205.14008186762	0.929062150366501	0.11377058102456	8.16610183405796	3.18514429052702e-16	1.57815121638908e-14
Abca5	96.384775378663	0.10515269313993	0.248055310373621	0.42390825248429	0.671632725435217	0.760321835891176
Abca7	934.975194409336	0.559460810466023	0.136513633057039	4.09820468430627	4.16367018477945e-05	0.00018214656499448
Abca8b	53.0017071036891	1.82615837583176	0.359660067105461	5.07745658429265	3.8252087662024e-07	2.57434504399237e-06
Abca9	59.5061841846539	0.660872805347276	0.345681823499407	1.9117950682426	0.0559024846040102	0.105699033765245
Abcb10	270.197814205041	-0.65114873508631	0.170706554594989	-3.81443311670837	0.000136495896973769	0.000526609706748889
Abcb1b	463.680654301238	1.39988712612147	0.192226419886781	7.28249075723297	3.27712399514019e-13	8.00827290851248e-12
Abcb4	1563.40699007541	-1.8883517080748	0.195351052226367	-9.66645270938516	4.18637642858439e-22	6.84227887710838e-20
Abcb7	1688.94886224706	-0.293592199208606	0.0999822624291812	-2.93644284571537	0.0033199999298507	0.00910485925412313
Abcb8	874.437577023844	-0.987814237138842	0.161993992007527	-6.09784489472266	1.07507983440742e-09	1.24469914590776e-08
Abcb9	72.8133194754739	-0.194080932253424	0.25144531927889	-0.77186138445536	0.440196530484363	0.558567587834817
Abcc1	6703.72071979788	0.51553234422857	0.104286806212819	4.94340907493626	7.67681627256051e-07	4.85005908271614e-06
Abcc10	162.435557005188	-0.00750194950978539	0.184386820614682	-0.0406859312654585	0.967546277532873	0.978966984163407
Abcc3	1312.16242923705	1.46773025875258	0.151992836718513	9.65657520736182	4.61018833025564e-22	7.2524025170334e-20
Abcc4	392.282460781936	0.474839083336584	0.137718071377336	3.44790686209629	0.000564948814017002	0.00188391118823635
Abcc5	2601.78995316012	0.0358781311671948	0.0913920614762996	0.392573825205802	0.69463427506576	0.779141920829107
Abcd1	1235.73006076488	0.73508022798915	0.121325739810425	6.05873270698975	1.37198155791365e-09	1.55833825869524e-08
Abcd2	69.4213917274542	1.83019833667619	0.352187870886079	5.19665351356804	2.02908047647827e-07	1.45753297925109e-06
Abcd3	859.103431900128	-0.426314242025438	0.149700212399296	-2.84778648735868	0.00440244496999437	0.0116690753890857
Abcd4	89.8372304535961	1.30526350753329	0.202358968051657	6.45023801070227	1.11674628072975e-10	1.53509388470179e-09
Abce1	1506.5525306812	-0.149979019939856	0.094666707408858	-1.58428474006293	0.113128936835424	0.190873799446817
Abcf1	1591.0351294534	-0.115066078832007	0.102570278197892	-1.1218267206998	0.261936122644453	0.373579567484184
Abcf2	808.364685008163	-0.0383602646819066	0.110807163371287	-0.346189393490483	0.729200385252384	0.807193847163449
Abcf3	647.662400667371	0.00348852675807327	0.114701028137583	0.0304140844656493	0.975736812273195	0.98378847800498
Abcg1	2762.1447929678	0.112594971074517	0.114082130627583	0.986964132376518	0.323660222378013	0.440686346275808
Abcg2	54.8917406861761	0.799662737906836	0.239905322039637	3.333243010652	0.000858399313886793	0.00274604864394135
Abcg3	289.087029266361	0.919360445263935	0.247055702577606	3.72126785851114	0.000198225039755798	0.000737411210560662
Abhd10	201.179699956832	-0.48886780634018	0.161207303471227	-3.03254130435496	0.00242503907149568	0.00693301152084805
Abhd11	146.436203567284	-0.368089643756144	0.175265739918507	-2.10018024017298	0.0357129889040805	0.0721309525530177
Abhd12	1477.09734877125	0.639956315704138	0.111709305117405	5.72876462736524	1.01164645051587e-08	9.58702603896255e-08
Abhd13	647.603122218289	-0.484532345640692	0.141203237750055	-3.43145350886619	0.000600356025287285	0.0019909039731859
Abhd14a	40.582873739248	-0.1807914576695	0.299785610785787	-0.603069163978937	0.546462678994246	0.656851271742368
Abhd14b	55.3510570136941	0.21116367379483	0.249911926123094	0.84495236810276	0.398137433928667	0.517521585340012
Abhd15	40.8914667266463	0.924125600698614	0.262044727958951	3.52659489811747	0.000420940283002998	0.00144869264116398
Abhd16a	538.536765703945	0.156927466698057	0.116895889965595	1.34245495495388	0.179448526395229	0.276556417423948
Abhd17a	624.534036012431	-0.277719084467425	0.105685344686544	-2.62779182195149	0.00859410922024618	0.021009491945765
Abhd17b	566.130771963227	-0.0200155917159826	0.116692819198354	-0.171523765159535	0.863811945440976	0.907510921894539
Abhd17c	890.352460404072	-0.148961032520365	0.0938279185130393	-1.58759817846394	0.112377230372842	0.189885532255937
Abhd18	90.9294720948146	-0.755464303048732	0.187940389042411	-4.01970170913211	5.82718731079667e-05	0.000247002870684999
Abhd2	1587.30691535227	0.276644401110567	0.103875251639718	2.6632368802348	0.00773929115220903	0.0191617114205293
Abhd4	789.965155011751	0.436234628399995	0.10532197753303	4.14191452361583	3.44418709194976e-05	0.000153217018565527
Abhd5	690.998445171235	-0.188755406162864	0.143549502420827	-1.31491508489881	0.188538442399532	0.287223858806212
Abhd8	145.6294600783	-0.0162036997904138	0.164521176699042	-0.0984900552957697	0.921543168291242	0.947672885516039
Abi1	4061.23608732131	-0.175984847357477	0.078158811074297	-2.25163158111741	0.0243455635989899	0.0521158220604334
Abi2	546.324694740286	0.313957442142869	0.130840364423262	2.39954576347121	0.0164154277695696	0.0368249836862804
Abi3	87.9857071541534	-0.272623520582215	0.192497399528802	-1.41624521292	0.156703722449615	0.248127371291948
Abl1	1692.80593511357	0.38257792573008	0.121387003321897	3.15172065592189	0.00162311472823409	0.00485660933305421
Abl2	5605.61563522946	-0.527906532935796	0.149605260884859	-3.52866289469653	0.000417664806182182	0.00144087488645909
Ablim1	1156.76841624441	-2.20533854396214	0.388661560624438	-5.67418743551321	1.39348493147865e-08	1.26712484556783e-07
Abr	7429.57183695919	-0.334173028801774	0.128930102202487	-2.59189299545385	0.00954494545107852	0.0229653087715428
Abracl	298.36047910523	-0.473812055291485	0.136602405933434	-3.46854839088539	0.000523278277335022	0.00175691538450663
Abt1	167.226401461668	-0.177629932240942	0.176118164589466	-1.00858382583648	0.313174267433642	0.429741871240486
Abtb1	355.898548029664	0.263457283853079	0.134979007655074	1.95183894466255	0.0509573289521688	0.0978357375130073
Abtb2	259.847274338071	0.562608593316843	0.152783458612809	3.68239204966968	0.000231055717504554	0.000847271621443708
AC122844.3	35.7062800326868	1.14445243804251	0.329215647559992	3.47630025038211	0.000508382779167617	0.00171528077099852
Acaa1a	1080.38885404934	0.129187661722935	0.121073998914538	1.06701408131505	0.285965477359358	0.400604104641056
Acaa2	1469.40463121455	-1.1674001225096	0.161187966564578	-7.24247688826011	4.40563533954802e-13	1.04416046606802e-11
Acaca	519.981579205448	-0.13609916798642	0.131773666300241	-1.03282523593389	0.30168569162656	0.417221365837391
Acacb	33.9051888786936	-0.739270995995922	0.311066139098645	-2.37657174174616	0.0174743629438563	0.0388885689917652
Acad10	230.853923515757	-0.851142061411693	0.282068747889944	-3.01749863385712	0.00254870189894225	0.00723746496790852
Acad11	499.955102417254	-1.16257880839627	0.153926009228423	-7.55284187658649	4.25861911645079e-14	1.25221312104049e-12
Acad12	134.372234481459	-0.313233390995973	0.195977291714682	-1.59831472440185	0.10997295207874	0.186524205109291
Acad8	319.196158254287	-0.201998902421619	0.124770078371741	-1.61896910747929	0.105453910125598	0.180342092530324
Acad9	302.696513215736	-0.292637914928291	0.178107230944187	-1.64304342601336	0.100373948704618	0.173279306508589
Acadl	1052.94842918918	-0.386518199959386	0.104984774047865	-3.68165958792427	0.00023172067176482	0.000848967876029189
Acadm	1062.42795397671	-0.70608483014648	0.12249156020752	-5.76435493964043	8.19707449633998e-09	7.92030970130461e-08
Acads	714.206832866515	-1.01646608632518	0.175609277481292	-5.78822543378134	7.11339037647179e-09	6.96669399905817e-08
Acadsb	709.402398175675	-0.0874774622311658	0.111531074762967	-0.784332639285314	0.432844952418937	0.552013120446507
Acadvl	512.280647712024	-0.302456225203829	0.138328351891868	-2.18650928076018	0.0287783664447154	0.0600324451693591
Acap2	8356.23213391471	-1.11830942428325	0.169941073856345	-6.58057171763301	4.6864271193136e-11	6.96324501730362e-10
Acap3	521.757830209305	0.00982974843337621	0.119117077827998	0.0825217392217272	0.934231831890263	0.956645341193334
Acat1	1137.16217654492	-1.02698593008301	0.134211243125664	-7.65201115916519	1.97860063035551e-14	6.41770333325362e-13
Acat2	116.247855511428	-0.0316033628188028	0.206793106129493	-0.15282599797603	0.878535495140475	0.919142838668458
Acbd3	1362.51509682149	-0.010839595807327	0.128162369301581	-0.0845770553899499	0.932597640840799	0.955478378847307
Acbd4	71.0185843277386	0.0778410674051749	0.231694833004325	0.335963760589007	0.736898194531347	0.812427838648884
Acbd5	1109.85058390305	-0.0735206138927385	0.150466918742143	-0.488616464717615	0.625113254249067	0.723211810007587
Acbd6	324.217080711894	-0.115569833100231	0.121760177667512	-0.949159530760665	0.3425394807471	0.460139747544348
Accs	153.436586680297	-0.503170600652254	0.208741191386892	-2.4104998026942	0.0159306799391614	0.0359039410878128
Acd	196.153186954268	0.074871558902891	0.158773317545869	0.471562602962307	0.637239025172157	0.732923883366075
Acer2	62.4441116895273	-1.26353615193274	0.345571487556162	-3.65636690940073	0.000255815131233753	0.000928861346386837
Acer3	1269.15265077608	-0.470804685774198	0.103356948702377	-4.5551333672776	5.23523521012219e-06	2.79293917420042e-05
Acin1	1668.62394160071	0.0714212013383195	0.0956728595473281	0.746514755346979	0.455356521559819	0.572952785419798
Ackr4	35.2979654566699	-0.900453542631552	0.304303168934575	-2.95906725448906	0.00308571750054408	0.00854616081521726
Acly	4163.5008313928	-0.494098180645054	0.131556520573441	-3.75578632280127	0.000172798079870008	0.000651877648430471
Aco1	1628.721961733	-0.820720738234897	0.151037907259493	-5.43387254978873	5.514397455701e-08	4.44578423958982e-07
Aco2	7841.01936006846	-1.29539216039525	0.184231841891184	-7.03131525526608	2.04595636949765e-12	4.17992871917661e-11
Acod1	2469.37955792157	2.08394251413727	0.131186866833037	15.885298311069	8.0115907323758e-57	1.00825869366949e-52
Acot1	41.7964197069269	0.367077767124349	0.316840789954584	1.15855590177315	0.246637252791774	0.356035523936757
Acot10	76.2789389222642	0.0823012993038845	0.206879315069222	0.397822756114338	0.690760841834583	0.775618527172306
Acot11	206.247255600773	0.542048002965696	0.184016420824344	2.94565017913873	0.00322276656319938	0.00886718784387062
Acot13	256.07649699887	-0.677799521193724	0.168144354245794	-4.03105726763157	5.55265110632723e-05	0.000236560982305783
Acot2	206.564633591479	-0.335221467353971	0.140386945049355	-2.38783931964699	0.0169477496718053	0.03785719375571
Acot7	865.484625974086	0.178231370718694	0.142308265901246	1.25243161098159	0.210412633740615	0.313823535864617
Acot8	212.686453192869	-0.349787091376465	0.172895675096316	-2.02311070639337	0.0430617349664246	0.0849023867385953
Acot9	447.921607322499	0.253049052258346	0.138863780662104	1.82228260711184	0.068412115884407	0.125651850321842
Acox1	1653.81030362471	-0.312378384839366	0.109634889288017	-2.84926073139666	0.00438209526254623	0.0116298331672594
Acox3	1411.51816728692	0.896012643192931	0.110942617258844	8.07636114354876	6.67280667204724e-16	3.07609054826793e-14
Acoxl	41.4200973363084	-0.668265435759722	0.266226454558223	-2.51013911021218	0.0120683609046084	0.0282410416482888
Acp1	259.028022172952	-0.344220690329656	0.144592835839689	-2.38062064645647	0.0172835003847445	0.0385046649569853
Acp2	2234.45976435944	0.70544232373573	0.0931536574118517	7.57288917403235	3.65013690357158e-14	1.10063407636751e-12
Acp5	67407.3951328612	-2.10609030606717	0.267906948236551	-7.86127541644638	3.80241689453066e-15	1.4815299262436e-13
Acp6	219.33553243236	-0.392641961108305	0.138955330751676	-2.8256703717973	0.00471817894246426	0.0123869215430158
Acpp	329.754942029435	1.1423502649418	0.140096209833866	8.15404118567142	3.51960922330617e-16	1.7036262336657e-14
Acsf3	247.738371967865	-0.718335465478323	0.130751324810072	-5.49390582865426	3.93140184701845e-08	3.2744336363155e-07
Acsl1	2988.3784025735	0.518779065823687	0.121967240085502	4.25342957223605	2.10521169912039e-05	9.79810992360581e-05
Acsl3	569.130417683739	-1.25672906447099	0.150618107367892	-8.3438112882495	7.19337483094101e-17	4.17182591001809e-15
Acsl4	2307.80707111107	0.0236805889942069	0.14189216927184	0.166891443803634	0.867455465586806	0.910274913233549
Acsl5	1568.87531395533	0.0858035716295018	0.101876472202327	0.842231476754475	0.399658398044955	0.518654324657129
Acss1	63.4505328046677	0.956161189468975	0.233114025217422	4.10168881334866	4.10145627939335e-05	0.00017966177262849
Acss2	171.776364169447	0.224583892380492	0.165184651074196	1.35959298227785	0.173958760133122	0.269647862578561
Actb	106989.950333414	-0.0712155266531934	0.11036161369583	-0.645292545734895	0.518737622448239	0.631181763367599
Actg1	2244.0550518475	-0.631905758373283	0.171609009817823	-3.68224115414512	0.000231192559079158	0.00084752646548535
Actl6a	459.579814051893	-0.051510746572659	0.122880164379218	-0.41919496798273	0.675073649358148	0.762570853349995
Actn1	6838.32298928083	-0.797275002206292	0.143359450608082	-5.56137037931244	2.67664446945006e-08	2.30249970253103e-07
Actn4	5178.79746242324	-0.471832778161623	0.107724044136313	-4.38001359812087	1.18671903205994e-05	5.84305908391015e-05
Actr10	704.224488315869	-0.316313906410415	0.121076606273298	-2.61251051005196	0.00898799287134796	0.021816873641498
Actr1a	2251.22818729331	-0.105748562677411	0.0970545663925929	-1.0895784362134	0.275898886224392	0.389389647093638
Actr1b	1448.1691915583	-0.427205769470542	0.121641250579317	-3.51201395444369	0.00044472464742075	0.00152129918124222
Actr2	12489.84201145	0.0614635701507831	0.10188333787777	0.603274013504754	0.546326417423518	0.656790496731148
Actr3	6731.88387834851	-0.233790279998873	0.0965560436744196	-2.42129100470601	0.0154654911756615	0.0349996774762992
Actr5	206.619382952078	0.265601128901611	0.18786332171389	1.41379981189789	0.157420688828022	0.248980692333877
Actr6	85.6766813083069	-0.0201428866726911	0.210821477580937	-0.0955447561786392	0.923882142545847	0.949147490933836
Actr8	420.742022019286	-0.419186437417639	0.105698083539062	-3.96588493738131	7.31241340978946e-05	0.000302189024291016
Acvr1	424.564946878055	-0.321744749326425	0.129486079082254	-2.48478254656272	0.0129630591871234	0.0300831901701149
Acvr1b	399.13528480857	0.106744589518274	0.138021613101545	0.773390392414409	0.439291374182829	0.55770018602753
Acvr2a	423.113404687124	0.368426431410505	0.150063408605562	2.4551383634028	0.0140830371348032	0.0322773670263156
Acvr2b	80.8538009555376	-0.889558054997328	0.250459887267691	-3.55169869595354	0.00038275288149312	0.00133322585485494
Acvrl1	140.303670160106	1.82319006412546	0.265600659657816	6.86440337337394	6.67697166769498e-12	1.21254961670911e-10
Acy1	167.486772018638	-1.13817066247016	0.194206871010251	-5.86060965067545	4.61170895913944e-09	4.68807409133844e-08
Acyp1	36.6263427074062	-0.216871614667532	0.290111343627865	-0.747546138511979	0.454733963157791	0.572454428962769
Ada	61.3157942176452	-0.0727000597160588	0.231312478462498	-0.314293721632684	0.753297966225289	0.825229107819262
Adal	91.4521733436511	-0.443624226438989	0.216261513937056	-2.05133228914742	0.0402345980759952	0.0799545897341545
Adam10	3108.22313880493	0.315759711719183	0.0953883511210759	3.31025442843006	0.00093211202438372	0.00295556307051376
Adam15	1239.45457471276	1.20883687808573	0.1173270427474	10.3031394108203	6.81985651195625e-25	1.65053642698018e-22
Adam17	3675.71563253059	0.984864634547007	0.106119942511486	9.28067440707862	1.68409187962707e-20	2.16268329643946e-18
Adam19	33.2159360003735	0.566639134999625	0.387090848043418	1.46384017566871	0.143237622345094	0.231108394514488
Adam22	65.6464906611139	0.201207317410996	0.298195450070539	0.674749790325105	0.499834745172749	0.614007869894018
Adam33	106.7724465643	1.06094631395618	0.361979266456184	2.9309587931457	0.00337917601877364	0.00925101809794786
Adam4	41.5053719176667	0.0926056536195285	0.280867020838823	0.329713518315384	0.74161643829681	0.816342418959622
Adam8	7158.31433883465	1.73183087841393	0.13761936978941	12.5842087568345	2.57914075441639e-36	2.31846331388073e-33
Adam9	2680.36840935666	0.163688744490299	0.10455233503927	1.56561538705776	0.117438685545529	0.196642610110495
Adamts1	30.764694494231	0.383707417461153	0.448114952957085	0.85627005956639	0.391848418235014	0.511186596841042
Adamts10	275.502204589273	0.798127982439725	0.154734524269203	5.1580472180285	2.49538698226616e-07	1.75443827775529e-06
Adamts14	160.375720587775	-1.33974481029238	0.238378682151221	-5.6202375069868	1.90695120885612e-08	1.68650604100171e-07
Adamts4	49.5401539578298	-1.73873232294469	0.379764622578306	-4.57844733177108	4.6844007660512e-06	2.52152196923671e-05
Adamts7	107.981714706724	-0.660584271880241	0.196072153072466	-3.36908766252032	0.000754174386484488	0.00244494710301579
Adamtsl4	231.41839779584	-0.0953476233473614	0.192213033869795	-0.4960518099514	0.619857857697557	0.719176835910736
Adamtsl5	115.892334277802	1.31938159747195	0.241470016672507	5.46395621143041	4.65638443511525e-08	3.8176285417541e-07
Adap1	874.94496073132	1.15030869811962	0.149120671317665	7.71394527636728	1.21986795921691e-14	4.07215869144424e-13
Adap2	648.273169119013	1.38041553272932	0.204099019055884	6.76345990840532	1.34734670328224e-11	2.30698751847714e-10
Adap2os	64.7862415435306	0.916838542963098	0.234844551854285	3.90402304726223	9.46067656329131e-05	0.00038027024768132
Adar	1071.10876420818	0.510649855811466	0.140037585034198	3.64652000880165	0.000265815788625267	0.000960187055065724
Adat1	68.3285541241351	-0.174934994744717	0.249280608213532	-0.70175933859592	0.482829260499044	0.598660713633543
Adat2	53.8877129205031	0.456925437350897	0.289420746578199	1.57875840883245	0.114391481775349	0.192539360457773
Adat3	46.5372819636595	0.183546866853681	0.247539433311197	0.741485364163911	0.458399202673338	0.576261508904601
Adck1	234.30687021652	-0.274269859642806	0.141839736712011	-1.93366024219066	0.0531549151386076	0.101341403881136
Adck2	141.342097895315	-0.155624097764082	0.146963467220503	-1.05893049958181	0.289631432871373	0.404372263444223
Adck5	152.398642634131	0.0565655668163618	0.185630254567652	0.304721700393655	0.760578120639654	0.830451492559223
Adcy3	1717.37661191833	-2.02260501226031	0.228532794531674	-8.85039285676777	8.7211753759041e-19	7.67524420319952e-17
Adcy7	3760.19615933606	0.904917739613112	0.101006929429181	8.95896692164649	3.27734433677296e-19	3.19731616110757e-17
Adcy9	710.136638100959	-0.547466058837311	0.146591055842983	-3.73464844556215	0.000187977587875705	0.000703657924870835
Add1	2567.65990108579	-0.24658480851522	0.11785808851083	-2.09221795152872	0.036419023362239	0.0733373525224412
Add3	405.015155511776	0.802455727315713	0.161694232019893	4.96279748072267	6.94850242068275e-07	4.4254505548731e-06
Adgb	90.3303956258405	0.551685495675489	0.246973962833831	2.23377998775796	0.0254975529336356	0.0541033052891255
Adgra3	432.75558732231	-1.90645110345891	0.274727394417845	-6.93942847417432	3.93689383859001e-12	7.61072334234335e-11
Adgrb1	162.590553492404	-1.66876338649115	0.341516283484738	-4.8863362222836	1.02729706771157e-06	6.34996738563366e-06
Adgre1	10654.7713710134	1.40008443810644	0.183350421235375	7.63611247071575	2.23878769263531e-14	7.15105155122218e-13
Adgre4	97.106105793855	1.96816918846428	0.327915536126858	6.00206142017886	1.94827969098817e-09	2.14703151585693e-08
Adgre5	2175.06719902341	-0.454349677747509	0.123053083235939	-3.69230632666351	0.000222229563706266	0.000817765806796303
Adgrf1	33.6511858124263	0.0922367480807175	0.285144283672801	0.323473951126294	0.746336332022883	0.820112618769998
Adgrg6	149.225204427956	1.13916438190302	0.218178936158142	5.22123905250562	1.77729936725956e-07	1.29290823913072e-06
Adgrl2	1574.08681955689	-0.521574299041299	0.0968694875991635	-5.38429914277572	7.27274649483919e-08	5.76007014710832e-07
Adh5	987.374428914311	-0.128064460527683	0.100973479652027	-1.26829798249022	0.204691557281158	0.307110544633212
Adhfe1	60.9587715747121	-0.355109144477711	0.248974335434636	-1.42628815077584	0.153785183503878	0.244644992339313
Adi1	341.965282343406	-0.0926953836499312	0.147200008320164	-0.629724038114974	0.52887515239102	0.640420840261809
Adipor1	3086.260163092	-0.126699863223694	0.136034044286226	-0.931383492187502	0.351655226918174	0.469999011310721
Adipor2	1414.7691033324	-0.0175356024417906	0.0845653783175646	-0.207361485168788	0.83572755923536	0.885993710132003
Adk	291.188775088682	0.850870381879587	0.143782114102511	5.91777626299855	3.26323451825418e-09	3.40529074728266e-08
Adnp	125.640692850287	0.105280127730474	0.175591356801936	0.599574658160586	0.548789740397073	0.658830380892604
Adnp2	359.270508658733	0.418693564982226	0.156830265941943	2.66972425550322	0.00759135609817611	0.018839916485022
Ado	873.230204585383	0.589593352643464	0.106432550433769	5.53959620661686	3.03169861176415e-08	2.57448900330984e-07
Adora2b	75.051528021643	0.871387959762726	0.214837482272584	4.05603319562791	4.99131687535996e-05	0.000214681212838021
Adpgk	351.913994338046	-0.444453430075268	0.117829587263425	-3.77200192581197	0.00016194300592093	0.000614797203473575
Adprh	754.191398547786	0.0157514396958846	0.0960445809171898	0.164001337144316	0.869730091175757	0.912129433120575
Adprhl2	226.524461066664	0.512296300029802	0.15542968107393	3.29600045815014	0.000980718552968254	0.00309409450717109
Adprm	169.198317440757	-0.0561962137000919	0.157714462757984	-0.356316172387602	0.721603799267039	0.801227977763439
Adra1a	38.0379289535475	0.250181069865702	0.279743997826808	0.894321493255387	0.371149903366805	0.490539963649574
Adrb2	657.789663508297	1.56855303529703	0.234444899104231	6.69049760216651	2.22413003931303e-11	3.61170019932317e-10
Adrbk1	2860.03652078586	0.442867932838116	0.111825254548427	3.96035702870972	7.48377886467015e-05	0.000308292494310553
Adrbk2	3849.62432056125	-1.18273267334488	0.102550650559902	-11.5331562197553	8.9790366627234e-31	4.03575630001336e-28
Adrm1	294.502230674349	0.0214915747566808	0.135695214085393	0.158381228855692	0.874156404287185	0.915538462421709
Adsl	490.852123587003	-0.0497060047415639	0.117957298192097	-0.42138982075205	0.67347045100849	0.761511736382915
Adss	2179.7025459848	0.306324663409766	0.101468734924521	3.01890689420372	0.00253688482086353	0.00721344226628276
Adssl1	1131.08605400702	-0.971028507328344	0.172064099672584	-5.64341143315825	1.6671330500939e-08	1.49436391990254e-07
Aebp2	1994.32154592466	-0.353063437915846	0.112587317571059	-3.1359077161867	0.00171323104423844	0.00508274698060837
Aen	325.279498212661	-0.0533163615416317	0.129993412962585	-0.410146639945345	0.681698381092772	0.768467764784355
Aes	3579.98359250344	-0.300700099361479	0.1008423672958	-2.98188258987851	0.00286481843311612	0.00802799821437683
Afap1	145.97868040017	-0.695576841320978	0.249560595820863	-2.78720620550317	0.00531646372492858	0.0137897147523137
Aff1	3131.21416641622	0.266306101718674	0.121461979605962	2.19250585724524	0.0283430006287437	0.0592814796265147
Aff2	70.4895387731867	-0.798684083769826	0.261312603223668	-3.05643154565416	0.002239886199146	0.0064519258501456
Aff4	3648.04510141161	-0.063431160927327	0.125107003953447	-0.507015266314986	0.612144106951332	0.712526228818212
Afg3l1	965.747330651723	-0.00978611835970954	0.103927859422553	-0.0941626086987983	0.924979986695033	0.949810144627692
Afg3l2	1483.97645471972	-0.783346522300321	0.1461795644109	-5.35879639166521	8.37782062406966e-08	6.5325199847532e-07
Afmid	35.7795704851807	0.524543745545931	0.370235505601303	1.41678401344575	0.156546085081733	0.247908956933889
Aftph	2004.77575877476	-0.0578679886706885	0.0770374255818344	-0.751167218188219	0.452552026349402	0.57004976995368
Aga	313.12192929511	-0.306006968674587	0.157847252793999	-1.93862714274759	0.0525467560127044	0.100349153933215
Agap1	4671.02593565815	-1.34574263116235	0.189650638003032	-7.09590352731023	1.28509102502145e-12	2.73652631977917e-11
Agap2	27.6419721029874	1.53908955276094	0.360772194288763	4.26609804504239	1.98921388338762e-05	9.32027428236529e-05
Agap3	2203.15708205826	-0.581512061592682	0.110865500550485	-5.24520304968884	1.56110304766734e-07	1.15296255016981e-06
Agbl3	40.1345621243727	0.222170512775737	0.327354809063026	0.678684126900856	0.497338025726573	0.611812368752328
Agbl5	196.197693185907	0.175044247384564	0.172922607472095	1.01226930326511	0.311409307807704	0.42761441775886
Agfg1	2262.88315489277	0.26180811183275	0.130036826979794	2.01333820513348	0.0440790617098107	0.0865556235946275
Agfg2	789.103980341325	-0.96300355092709	0.138677216749072	-6.94420881455665	3.80587208048338e-12	7.39149693408693e-11
Aggf1	857.5950592703	-0.0366038680924973	0.0933790687120924	-0.39199221621448	0.695063965073723	0.779415486095768
Agk	218.996682986676	-0.126999479146646	0.14523633420587	-0.874433245930224	0.381882358719695	0.501564337767414
Agl	1887.46583564336	-0.714975452057342	0.126963993118233	-5.63132455507707	1.78830834357466e-08	1.59277144401183e-07
Agmo	38.2691346177281	0.730969263453624	0.399521146023695	1.82961345282653	0.0673077606612469	0.124021693692795
Ago1	1399.19641323121	0.111117408110302	0.104871251390158	1.05956023826688	0.289344710838082	0.404205536274996
Ago2	8721.87956893535	-0.756430256582106	0.120247849823988	-6.29059278556185	3.16255949647596e-10	4.02434896492922e-09
Ago3	1837.17531899951	0.134414219092348	0.0860745998536995	1.56160144015553	0.118381910006495	0.197800894507665
Ago4	643.372975745347	-0.469323988841504	0.107238156177402	-4.37646454928888	1.20619798580278e-05	5.93200533463385e-05
Agpat1	939.613366784778	-0.362448538337243	0.116965517590305	-3.09876402724768	0.00194329731334037	0.00569548129678356
Agpat2	165.781763389933	0.337251829983873	0.174582663768795	1.93176013415917	0.0533891187205276	0.101726276926244
Agpat3	356.941662335951	0.361743177616389	0.137939603432176	2.62247511675829	0.00872936420678566	0.0212781422704624
Agpat4	955.671065877742	-0.683273367236367	0.15754839948122	-4.33691087618959	1.44499180681644e-05	6.96751796505171e-05
Agpat5	623.35349460227	-0.265613470729448	0.11295719769538	-2.35145237442723	0.0187002833663348	0.0413535523045727
Agps	1921.04601878945	-0.0268706764006254	0.0912739294382194	-0.294395963513474	0.768455350972007	0.837099505927699
Agrn	1353.17589967098	-0.594496144881507	0.116997665568268	-5.08126501493845	3.74929610993248e-07	2.52595779140794e-06
Agtpbp1	652.658883836542	0.139326618453331	0.136533411085477	1.02045805012595	0.307511274851872	0.423555805407772
Agtrap	515.585402829891	0.789282961891866	0.123113685441134	6.41100913406782	1.44559534319054e-10	1.94783912141895e-09
Ahctf1	1728.28227312375	-0.164018631924805	0.0923854019103468	-1.7753739068427	0.0758361694737357	0.136831282125729
Ahcy	117.363923633132	-0.503294322471017	0.198743922243511	-2.53237591766129	0.0113292459449459	0.0266951058260895
Ahcyl1	2480.76999870062	0.211443484922007	0.0789112833994222	2.6795088840686	0.00737302467102983	0.0183923717512211
Ahcyl2	1054.79576589942	0.585039142624784	0.102572029360505	5.70369082363163	1.17240650387893e-08	1.08971461235719e-07
Ahdc1	113.53635535853	0.136514437228371	0.211028901024879	0.646899247284979	0.517697153022956	0.630371863859232
Ahi1	49.9135540768259	0.294284290103892	0.268350223711534	1.09664261141156	0.272797652498254	0.385834845660882
Ahnak	53291.9919336122	1.21147368498359	0.106871665080697	11.3357800130542	8.72512569863734e-30	3.43142834116722e-27
Ahnak2	853.863283752852	0.663668496680447	0.131953084910102	5.02957924123258	4.91557323652503e-07	3.24567099589021e-06
Ahr	767.616337726791	1.2105299804406	0.162008892705611	7.47199712450523	7.89867346581928e-14	2.1847210014799e-12
Ahrr	641.271562878649	1.26287722232882	0.201924973179172	6.25419036806429	3.99583368436532e-10	4.99876410713097e-09
Ahsa1	1178.96729038218	0.37021316962722	0.142250753962496	2.6025392436572	0.00925362239119915	0.0223525600370905
Ahsa2	114.811518494329	0.405407727121618	0.189295332955353	2.14166784142131	0.032220220275592	0.0661379011855041
AI314180	3195.41468528035	0.0658559070083728	0.0752479492576816	0.875185405822206	0.381473032726818	0.501183643059505
AI413582	311.023401724075	0.416201758820299	0.132632212705418	3.13801413948134	0.00170096671462785	0.00505828594130233
AI467606	195.23751593252	0.157597087794574	0.175762843474796	0.896646211900712	0.369907730750254	0.489257886651807
AI480526	30.8390721805576	-0.71065154923772	0.353260665553793	-2.01169170115121	0.0442524459709518	0.0868283493209275
AI504432	77.8725331317467	1.87817925617032	0.3039418862456	6.17940251463946	6.43446513184152e-10	7.74165809600626e-09
AI506816	1069.4114786791	-0.140752520345058	0.175108420508139	-0.803802124058996	0.421511262882121	0.54048941801269
AI597479	185.529026579255	-0.424822772595331	0.145772041469145	-2.91429528127484	0.00356492537002812	0.00968788291552664
AI606181	257.672034883459	-0.467126333332486	0.164846207473175	-2.83370991964435	0.00460110772095887	0.0121292292979194
AI607873	3482.06392899778	0.782300295516107	0.151355480587263	5.16862879679523	2.35817748195526e-07	1.66822167568336e-06
AI661453	56.933744385238	0.297990054035324	0.219714678380504	1.35625920048574	0.175016711892416	0.271022611802897
AI662270	758.274075318221	-0.336795785521587	0.10654339638145	-3.16111365847377	0.00157167158190508	0.00472064125495834
AI837181	330.589577400018	0.139746328944518	0.117860732397826	1.18569031518334	0.235744620597735	0.344022037363462
AI846148	110.469554003236	0.236269918505547	0.184851255164168	1.27816237058122	0.201192181047548	0.302871243837726
AI987944	209.365615979669	-0.74192433920216	0.18710286377753	-3.96532861241678	7.32949007747215e-05	0.000302729348949744
Aida	514.646025615333	0.46628123064379	0.135147098330724	3.45017567082894	0.000560221872683703	0.00187161992772084
Aif1	354.404803202636	1.19151145899869	0.227718548810625	5.23238649298428	1.67335408727495e-07	1.22650909658447e-06
Aifm1	518.201801332645	-0.652752224238905	0.14995583886175	-4.35296304027683	1.34309800209432e-05	6.53125516087984e-05
Aifm2	598.155655540626	-0.229120133895796	0.124539509802693	-1.83973852361222	0.0658066348503783	0.121522597152166
Aig1	231.387507424096	-0.622643844801051	0.235343763062879	-2.64567812079513	0.00815273521250819	0.0200708475448778
Aim1	1876.19499603547	0.451028368632686	0.134421902285342	3.35531904373196	0.000792735009483609	0.00255481948638956
Aim2	737.228992564062	0.84594135744955	0.133667570859414	6.32869552435628	2.47242424469947e-10	3.20777929067452e-09
Aimp1	330.249842455505	0.017751439661293	0.138592821116769	0.128083399401595	0.898082973193122	0.932385267912509
Aimp2	104.085022538495	-0.158325074593001	0.180374321933203	-0.877758390973369	0.380074849286663	0.499659665546084
Aip	584.314599851252	0.377596033989629	0.100380907759332	3.76163199176214	0.000168808298671035	0.00063816534658305
Airn	296.412486027422	0.258020880691049	0.144908537195493	1.78057749863942	0.0749814984031415	0.135492119343942
Ajuba	30.8417189681754	0.0594238208200146	0.308025776261776	0.192918338007898	0.847022923152705	0.894727504438206
AK010878	64.5564787721302	0.122840184467155	0.273860631749903	0.448549993046595	0.653756314595251	0.745787093834412
Ak1	154.025312281725	-1.26519378458358	0.30383785400492	-4.16404265599867	3.12661662526375e-05	0.000140530250817658
AK157302	105.167532294745	-0.929061876067527	0.219755174862191	-4.2277133025429	2.36078335000599e-05	0.000108909305204638
Ak2	2203.8386509378	-0.784667001350752	0.101542897569999	-7.72744347589492	1.0972785869722e-14	3.72217008545691e-13
Ak3	1114.02943789786	-0.430882874002128	0.122785824153939	-3.50922329162301	0.000449417427529599	0.00153609949089082
Ak6	116.611444664701	-0.109514777096366	0.185629049619947	-0.589965726380566	0.555213627678508	0.664602808318939
Ak8	33.2312451861481	1.26962209307035	0.354612672164928	3.58030660697839	0.000343191269831474	0.00120914393360277
Akap1	390.371824353484	-0.608771129935503	0.128378995450413	-4.74198390320513	2.11635443133082e-06	1.2178473030772e-05
Akap10	1144.0017185	0.0545061833022876	0.0848025308303945	0.642742413092603	0.520391255317002	0.632460062594348
Akap11	970.240953091776	-0.069573136840884	0.106839038304289	-0.651195835764942	0.514920078128073	0.627933060391647
Akap13	3214.4140886887	0.576727815140847	0.112946034831466	5.10622454344163	3.28659122686665e-07	2.24182930027733e-06
Akap17b	78.4465287454759	-0.882739631364662	0.250039681071782	-3.53039816552655	0.00041493471234395	0.00143263466525339
Akap6	6953.29172351775	-1.89002790864214	0.252327281220269	-7.49038272636179	6.86730632574577e-14	1.93344631117473e-12
Akap7	177.934303114441	-0.65456139606166	0.167823957344636	-3.9002857900525	9.60792037770111e-05	0.000385819010699963
Akap8	967.849853547492	-0.0788662530133563	0.12387838615984	-0.636642560967782	0.524357695533314	0.636358881223409
Akap8l	301.436694412733	0.101919995464906	0.142196860058285	0.716752784999119	0.473526649521415	0.590652582691113
Akap9	1663.39153813859	-0.107838160538317	0.0829288526841445	-1.30036961863016	0.19347431755637	0.293429053560727
Akip1	417.994995052476	-1.10997782761191	0.149409680937042	-7.42908907006919	1.0934809825055e-13	2.94048251385293e-12
Akirin1	1191.79655448805	-0.00520919316604519	0.143882282903236	-0.0362045490308802	0.971119258767052	0.980930891080251
Akirin2	739.496842049913	-0.228681054010998	0.0932122882212723	-2.45333591069177	0.0141538098111228	0.0324218595691627
Akna	791.425932252063	1.61208055831632	0.137240027534146	11.7464313238732	7.36645858669683e-32	4.41461339588474e-29
Akr1a1	14488.2246584702	0.204346844584763	0.119835014891762	1.70523485785298	0.0881506313171248	0.155396511433816
Akr1b10	497.811652277881	-0.058978436004849	0.130700383430346	-0.451249142939815	0.651809994491029	0.744511965799549
Akr1b3	202.331985360737	0.216655258684554	0.149174068791868	1.45236541738925	0.146400026773375	0.235125617271941
Akr1b8	1024.49424409716	-0.32847540046807	0.11806823461705	-2.78208106975994	0.00540115463149565	0.0139949621242275
Akr1c12	96.2683788302531	-0.270068832735041	0.191022009423077	-1.41381002927726	0.157417688034982	0.248980692333877
Akr1c13	378.110458207896	-0.477608946078388	0.143975232131918	-3.31729936466278	0.000908921703214771	0.00289077069369671
Akr1c18	645.152705624224	-1.91400192415504	0.293433057181643	-6.52278902226826	6.90119055596363e-11	9.90324779324997e-10
Akr1e1	256.230977497644	0.0684260918102998	0.144034369065791	0.475067806761072	0.634738643791553	0.731184057859652
Akr7a5	172.002888025201	-0.220402682769347	0.139809080058352	-1.57645471007576	0.114921048416388	0.193171849363619
Akt1	3475.11630521616	0.0412648599849325	0.0936515444884331	0.440621243465227	0.659487220982038	0.750555857845808
Akt1s1	434.143331246899	-0.270187559939958	0.119393695915243	-2.26299686820786	0.0236358823446616	0.05074929307646
Akt2	825.207609763788	0.296839854465903	0.112310711472379	2.64302354222825	0.00821693217754568	0.0202091247712356
Akt2-ps	264.6014293468	0.275357464840608	0.14925383322174	1.84489375513405	0.0650529952822776	0.120272064878429
Akt3	346.087993850415	1.77218949167761	0.233220308297979	7.59877861671177	2.98938668445551e-14	9.28259535565699e-13
Aktip	243.735961942489	-0.083397720396553	0.174232904845973	-0.478656545790126	0.632182984166565	0.729040855469277
Alad	86.535433781198	-0.232292585439556	0.197859036282057	-1.17403071299919	0.240382723911875	0.349132091661671
Alas1	2421.55802759497	0.59273422779761	0.138009995868265	4.29486447027645	1.74800089683155e-05	8.28884374025059e-05
Alas2	27.4745168668526	-0.188219063567249	0.374106456018431	-0.503116320339513	0.614882492967468	0.714854150022687
Alcam	3713.37421604545	1.11912736157707	0.127732860360444	8.761467945046	1.92723974251883e-18	1.56479433287738e-16
Aldh16a1	893.778869745217	-0.319372060654034	0.116768899091435	-2.73507811702457	0.00623654737627381	0.0158880463017016
Aldh18a1	358.755663348662	-0.341074615062053	0.274854436785464	-1.24092817656888	0.214632282784639	0.319020583305148
Aldh1b1	165.075621374079	-0.925503116442155	0.255829930418556	-3.61764987751028	0.000297290182042503	0.0010611005436087
Aldh1l1	457.430970930864	-0.551082791287333	0.14283666316203	-3.85813263267148	0.000114256643386193	0.000449069287012877
Aldh1l2	37.4088394224067	-1.20013644913225	0.422575046446016	-2.84005517889842	0.00451057309266903	0.0119266735421025
Aldh2	5947.29243948342	0.773826325143809	0.0923967073817521	8.37504221818878	5.52040784471304e-17	3.30830155836731e-15
Aldh3a2	782.28489913941	0.310049923487608	0.0924737626698095	3.35284208770313	0.000799863280597407	0.00257581355842333
Aldh3b1	1205.48866395071	0.265014511324565	0.112694559303431	2.35161761989779	0.0186919789928674	0.0413426889322034
Aldh4a1	401.794764957304	-1.28029258826533	0.205271355172845	-6.23707378551328	4.45831734087941e-10	5.53332581212697e-09
Aldh6a1	208.893542850503	-0.167053960906546	0.164465070597321	-1.01574127746288	0.309752606166955	0.42575759596015
Aldh7a1	336.222274147802	-0.561828979815404	0.14624975734059	-3.84157204792487	0.00012224884123383	0.000477054780442715
Aldh9a1	1687.00093447951	-0.136331243153186	0.0914156516770099	-1.49133371203076	0.135873902196503	0.22135573581139
Aldoa	15474.1331326876	-0.523555746029363	0.111237247297941	-4.70665859455382	2.51810097996232e-06	1.4255645898707e-05
Aldoart1	573.527386685351	-0.398998358905022	0.122531623786998	-3.25628883853379	0.00112878857682638	0.00351454830266205
Aldoc	541.266362345572	-0.527026380443042	0.150658638540962	-3.49814909750262	0.000468499143858686	0.00159353019607069
Alg1	301.0154269397	-0.0130071834633343	0.136408084015871	-0.095354931177106	0.924032912608556	0.949198528502266
Alg10b	939.389421270784	-0.280782510816452	0.103563718139358	-2.71120538988976	0.00670390859154017	0.0169585305777956
Alg11	302.270930699977	-0.204822484783924	0.125783460568809	-1.62837374530555	0.103445661160925	0.177462329022661
Alg12	134.782998509549	0.0278832701768769	0.151888197412622	0.183577596231053	0.854344840019071	0.900496634140705
Alg13	247.944134047318	0.0326403536769379	0.181476768835112	0.179859680588619	0.857262729162346	0.902740477492103
Alg14	74.5840732455922	0.161375544716453	0.243918228805232	0.661596902810041	0.508229593003094	0.621822810416483
Alg2	492.410154304143	-0.863847336786427	0.177574372185127	-4.8647072556497	1.1462633792373e-06	6.99259555390278e-06
Alg3	154.942492480148	-0.415493792759643	0.173824636669743	-2.39030439366923	0.0168344139065908	0.0376307458284982
Alg5	306.578298712347	-0.203060581676203	0.139226441676157	-1.45849149939869	0.144705116518125	0.232789708728186
Alg6	177.538821188427	-0.234429742003004	0.182557269362694	-1.28414356120354	0.199091728561178	0.300140336847159
Alg8	238.844375866519	-0.104613359219897	0.169474912376569	-0.617279323251388	0.537050502592291	0.647765054161777
Alg9	443.917325928276	-0.163262140951479	0.121364741390412	-1.34521887560645	0.178554562352724	0.275519963771683
Alkbh1	331.365338047352	0.251771301430014	0.148348654575645	1.69715931802827	0.0896665440875145	0.157649267580521
Alkbh3	303.387736467002	-0.350683557381617	0.120984515743844	-2.89858214686007	0.00374854097889108	0.0101191308921802
Alkbh4	106.088399529898	-0.70338582411993	0.215869226859413	-3.2583885825376	0.00112046865059341	0.00349123495115576
Alkbh5	2740.84232335559	-0.00538517614352862	0.104325869519831	-0.0516187995203333	0.958832439457541	0.972745364818473
Alkbh6	109.144785672816	-0.00582750144286186	0.178919694482735	-0.0325704862156702	0.974017105925923	0.982763190738214
Alkbh7	83.4157720047068	-0.175495389458433	0.221396838299885	-0.792673422105161	0.427968119040228	0.546884663602465
Alkbh8	299.577428267645	-0.375417381729886	0.125421206226327	-2.99325283997375	0.00276020975668766	0.00775529850589439
Alms1	222.831056616672	0.750757669475716	0.249760129771286	3.0059147957811	0.00264783181138479	0.00748494235091591
Alox5	528.967349083196	1.52498336558061	0.212760981429605	7.16758944865638	7.63297957857696e-13	1.71236666417479e-11
Alox5ap	1035.68837775874	1.38682903025348	0.185588894762382	7.47258628825339	7.86337717274979e-14	2.17974893654309e-12
Alpk1	438.076460768886	1.17070382882817	0.16377075484224	7.14843031624237	8.77757880750748e-13	1.9414029752633e-11
Als2	375.136624902916	0.793215501114655	0.172658847438591	4.59412021383252	4.34578813219981e-06	2.35031128679564e-05
Als2cl	494.269153181785	1.34725336771225	0.20970891763369	6.42439712585603	1.32393158968515e-10	1.79737638146576e-09
Alyref	732.19829667278	0.45550652989255	0.177058967346854	2.57262615228193	0.0100930165310282	0.024102583120112
Amacr	262.837444611983	-1.76858225829026	0.304100679239106	-5.81577871748085	6.0352260982239e-09	5.98528923925515e-08
Ambra1	1062.06387163355	0.337456166396514	0.113547060068029	2.97194983467063	0.00295915030160626	0.00825191813554504
Amd1	256.413911096226	-0.0473312941216433	0.13325024516746	-0.355206056560425	0.722435227724745	0.801918932250345
Amd2	28.7712050148799	0.208035735764269	0.341133754144091	0.609836268727595	0.541970273384061	0.652876281845769
Amdhd2	679.196460301219	0.864539053921345	0.166070918793996	5.20584254124449	1.93118350986486e-07	1.39357479768631e-06
Amer1	173.791615655472	0.156734660827684	0.158635035987817	0.988020457471456	0.323142629283429	0.440124457741554
Amfr	3038.22750361616	-0.225739843811107	0.117846162300256	-1.91554684009101	0.0554228016138527	0.104902385066978
Amigo1	88.2270669606259	-0.375841793456441	0.21575204615004	-1.74200801412131	0.0815070419455961	0.145560681550351
Amigo3	60.7934705403651	0.383864480919326	0.227143383205679	1.68996549889255	0.0910345553663365	0.159630748123916
Ammecr1	272.375213610502	-0.210086627099636	0.121575588056745	-1.72803299130726	0.0839823097280613	0.149155710969186
Ammecr1l	634.643720221221	-0.351952419513237	0.145356252722894	-2.42130911412663	0.0154647206682941	0.0349996774762992
Amn1	444.331907988222	-0.255269070188633	0.171710434665868	-1.48662526354536	0.137113811530502	0.223000428807362
Amot	184.514950095494	-1.88826511136097	0.24916812278997	-7.57827722991932	3.50173526613082e-14	1.06870553639523e-12
Amotl1	75.1240835286703	-0.123735406540866	0.209665497794198	-0.590156262440095	0.555085891871479	0.664602808318939
Ampd2	604.200672502016	0.708129999913941	0.169177895559035	4.18571230936512	2.84273215508386e-05	0.000129294485622444
Ampd3	1073.92180303873	0.885544616320512	0.134734934192946	6.57249451766068	4.94792099719388e-11	7.32583361761e-10
Amz1	306.905350646942	0.964147885277271	0.179430522346075	5.37337724190357	7.72754209854404e-08	6.08961285599103e-07
Amz2	285.43176830173	-0.220325321287968	0.144489630632463	-1.52485213176583	0.127295983598592	0.210211252275066
Anapc1	2758.04396047829	0.0502296737539603	0.0909952380395839	0.552003322768494	0.580946076736433	0.686820702275999
Anapc10	85.9812627235133	-0.238147253211942	0.228526079121045	-1.04210098964592	0.297364859810513	0.412788083026176
Anapc11	434.880626597771	0.26396123225326	0.122891870656154	2.14791451089398	0.0317205474065715	0.0652399230448933
Anapc13	204.737997219857	-0.628662676241239	0.193093978240042	-3.25573423869141	0.00113099561196723	0.0035196784808624
Anapc15	128.143211431271	-0.416954566487846	0.201416091038634	-2.07011547259086	0.038441532285304	0.0768159231201256
Anapc16	277.076579008794	0.043611524717548	0.132352098286508	0.329511396359885	0.741769181441099	0.81643914189577
Anapc2	1747.30013263011	0.124232838303744	0.0832944465239058	1.49149005111749	0.135832881315509	0.22135573581139
Anapc4	610.090760168964	0.164997678063624	0.100224885702412	1.64627454456307	0.0997072478466305	0.17219921972689
Anapc5	1971.19319126468	0.578159986576592	0.181772952401518	3.18067115562659	0.00146934314651682	0.00444862132902176
Anapc7	608.625294520542	-0.293193494175373	0.127967313358094	-2.29115925373008	0.0219542046322437	0.0475303054011331
Angel1	80.3912767353068	-0.675315198355243	0.224407883017964	-3.00932030226935	0.00261832916903263	0.00741486782004404
Angel2	596.90299298915	-0.210149949088818	0.0998869804135066	-2.10387728429522	0.035389152964229	0.0715687755190137
Angpt2	124.661223262694	-0.113735921074141	0.177805207181276	-0.639665861743772	0.52238985408682	0.634521408520667
Angptl2	230.037660903435	0.977868491180043	0.182020147760964	5.37230907242324	7.77347195338144e-08	6.11814537419046e-07
Angptl3	80.4950355178604	0.653424536997382	0.303573640849441	2.15244161241737	0.0313625892614911	0.064577582764376
Ank	5457.70010769275	-1.48088573104052	0.245186716067699	-6.03982856327186	1.54278056381766e-09	1.73821785099778e-08
Ank1	36.8365026369387	-0.505718785420707	0.323272610927037	-1.56437250891894	0.117730112899656	0.197051931219865
Ank2	618.961887775775	-1.9541093380641	0.426917751598854	-4.57725013950754	4.71127988959253e-06	2.53490625953493e-05
Ankdd1a	39.7001069788117	0.812888228928191	0.310001079435663	2.62221096264569	0.00873613352143421	0.0212888544245292
Ankfy1	3892.82173601267	0.160904998506044	0.0747744510299884	2.15187134495327	0.0314074887062375	0.064649553236128
Ankhd1	2371.01641362729	0.0228821114046795	0.104504441321356	0.218958267374647	0.826682556732332	0.879219130945356
Ankib1	996.065058148743	0.0643525510248241	0.11543288391125	0.557488896095684	0.577193443570798	0.683733008973879
Ankle1	73.4395495430408	0.772446522798517	0.306588021717341	2.51949348337775	0.0117523815785688	0.0275774866507174
Ankle2	994.510565204841	-0.0929355616704694	0.083193910008423	-1.11709573045743	0.263953395847207	0.376114599158125
Ankmy2	291.75742606277	-0.238357894817765	0.145386524879249	-1.63947721438238	0.101113912284862	0.174293738680317
Ankra2	156.278309491952	-0.0554428660590473	0.157907959402871	-0.351108748847775	0.725506764645938	0.804139583616783
Ankrd10	607.81229962432	-0.731306035389313	0.162754100370171	-4.49331865511231	7.01217366089991e-06	3.63011951963905e-05
Ankrd11	3257.15203010156	0.419978356319688	0.0961776299352733	4.36669479797256	1.26140791024429e-05	6.17697219860872e-05
Ankrd12	802.994628614491	0.521869667375473	0.125916290975176	4.14457623659165	3.40442684327611e-05	0.000151662696717274
Ankrd13a	3804.91287348509	-0.155446449088538	0.108756657486704	-1.42930513571126	0.152916550548708	0.243430780273123
Ankrd13b	1017.82352497717	-1.6162496873966	0.225494299576594	-7.16758556837756	7.63319585698894e-13	1.71236666417479e-11
Ankrd13c	1188.63793195929	-0.0401416712347495	0.0885677465107511	-0.453231258739058	0.650382225932162	0.743634706080007
Ankrd13d	88.72255428028	0.96193395260119	0.229675576148244	4.18822919151102	2.81139522318519e-05	0.000128007991620064
Ankrd16	272.468062576468	0.139452330096684	0.136609134389823	1.02081263247557	0.307343218220422	0.423370665641858
Ankrd17	4697.63308227785	-0.0730130999566241	0.0970318771022736	-0.752465088144866	0.451771417214162	0.569408441225862
Ankrd2	29.8365523451091	-1.79161945065914	0.469725640112618	-3.81418278599737	0.000136634314445429	0.00052698217814763
Ankrd24	176.197394883759	-0.909054831739551	0.176301366097525	-5.15625517749358	2.51937509534457e-07	1.76932676199283e-06
Ankrd26	131.507128494034	-0.0155329031958933	0.19736283753934	-0.0787022693307049	0.937269440416545	0.958363333412595
Ankrd27	350.907049464288	0.535259042424604	0.131815783527352	4.06065971844365	4.89342480967943e-05	0.000210831055220183
Ankrd28	1454.18132470473	-0.000304051567856609	0.164192426104956	-0.00185180020217407	0.998522478053438	0.999316531713918
Ankrd33b	1565.39407608947	1.17742761902682	0.192452695010849	6.1180105529852	9.47507937066287e-10	1.10615838478471e-08
Ankrd39	36.5897822648545	0.817420238141902	0.301466087117756	2.71148322505214	0.00669829302383777	0.016952954980062
Ankrd40	1098.50196706824	-0.278945729859489	0.0975489469163861	-2.85954629626691	0.00424247488280158	0.0112926282572034
Ankrd44	1148.65663883946	0.824710403958167	0.125687913729151	6.56157286320592	5.32431472752238e-11	7.80961548320153e-10
Ankrd46	227.800121156202	1.01815210891195	0.153139622738135	6.64852172616993	2.96051286402406e-11	4.64794872302377e-10
Ankrd49	185.802813156988	-0.224250104090546	0.135156999928415	-1.65918231545032	0.0970790600441045	0.168702011965625
Ankrd50	1020.51387863405	0.123180253563774	0.134385513596734	0.916618542184652	0.359342564522191	0.478011218842798
Ankrd52	1858.5466046037	-0.244550842602115	0.101807554672071	-2.4020893477879	0.0163017262258873	0.0366286778348138
Ankrd54	123.000255589495	0.220281873876797	0.235387411079313	0.935826911332033	0.34936231322697	0.467537719264294
Ankrd6	29.5219818994513	-1.9201885866209	0.388595224190102	-4.94135920126888	7.75798305508812e-07	4.89885683634139e-06
Ankrd61	84.9361755159646	-0.182212363673158	0.311921625787339	-0.584160726955772	0.559112181335572	0.667972925964323
Ankrd63	28.9828845543204	-0.403082096570691	0.335957970459833	-1.19979917731669	0.230217343770665	0.337797046910787
Ankrd9	44.9356935003757	-0.482739002014095	0.251675765629688	-1.91809887140421	0.0550984755572354	0.104338799912588
Anks1	760.72940488349	0.648606041101412	0.122617713510213	5.28966021738279	1.22543797131279e-07	9.24034563749039e-07
Anks3	250.566849440002	0.123959532361102	0.17386087645194	0.712981177196404	0.475857404733978	0.592643784124405
Anks6	115.817437024302	-1.55144270633043	0.290371099186799	-5.34296529742572	9.14382739658082e-08	7.08154263298275e-07
Ankzf1	216.367686301567	0.061906131004216	0.137213459893056	0.451166606049186	0.65186947565715	0.744511965799549
Anln	846.215488705711	0.638379072705338	0.233883578262731	2.72947368706759	0.00634355113199283	0.0161345171778759
Ano10	646.447304937542	-0.454479857053482	0.148869681406906	-3.05287048886235	0.00226663739727038	0.0065203836843861
Ano6	3032.29130257637	0.466587094309176	0.10021331166949	4.65593928128041	3.22506978249752e-06	1.78720841975919e-05
Ano8	346.938122197686	-0.47806749949044	0.136732550201953	-3.49636936328867	0.000471635364261115	0.00160333091821343
Anp32-ps	31.0814285043395	0.0545820153296011	0.369968523796212	0.147531510977043	0.882712509682173	0.921597555529297
Anp32a	556.29457683333	0.262610140350187	0.167405942570497	1.56870261782731	0.116717248345857	0.19569498673496
Anp32b	829.309812879325	0.305669476843439	0.134826905333919	2.26712521574534	0.0233825775938442	0.0502767365485272
Anp32b-ps1	204.96415178655	0.514869143969309	0.186391955598493	2.76229273047808	0.00573969919287417	0.0147718025239921
Anp32e	906.304051010565	0.214235488696229	0.142636446874071	1.50196877019357	0.133105174388135	0.218058919509852
Anpep	7159.60134609331	0.939192929968895	0.185057899885042	5.0751301649501	3.87230829487263e-07	2.6032585411844e-06
Antxr1	37.5281802474074	-1.75016376627964	0.344182436766065	-5.08498859710612	3.67648156431044e-07	2.48088581698911e-06
Antxr2	6924.05868904937	-1.28230083137048	0.160954382210073	-7.96685876931797	1.62758491013091e-15	6.73788029407814e-14
Anxa1	13745.5342859445	0.178271341030286	0.112136501047368	1.58977085396112	0.111886465894035	0.189285007833907
Anxa11	417.246922580636	0.00804095068176326	0.12989363384095	0.0619041168069031	0.950639189050301	0.966807180741034
Anxa11os	86.9314945276731	0.523518840477452	0.247005438206925	2.1194628113365	0.0340513734082081	0.0693424812851616
Anxa2	6929.78884404856	-0.125214048833243	0.106458884943863	-1.17617283798595	0.23952581619724	0.348127081284475
Anxa3	1229.65936590671	1.25115163324421	0.1243872641861	10.0585187835012	8.4256449003192e-24	1.73830723066421e-21
Anxa4	6601.55303800437	0.058774102468149	0.0936888236573082	0.627333124419738	0.530440894662894	0.641658877355905
Anxa5	7240.45352886899	0.144066284927461	0.0835374080718663	1.72457211987619	0.0846046114594925	0.150112651236108
Anxa6	1783.13248508985	0.710401367607355	0.117154826969353	6.06378231255626	1.32957083246344e-09	1.51563848972395e-08
Anxa7	1966.60969690915	-0.167369045142467	0.142480466994893	-1.17468063287908	0.240122510496071	0.348954017851393
Anxa9	72.1972311685874	0.742021808787756	0.250484778829096	2.96234291064061	0.00305307554940243	0.00847253710898116
Aoah	1331.60389078506	1.40368899949308	0.194620107372677	7.21245619706274	5.49515105457563e-13	1.2783082443962e-11
Aoc2	35.1304356414754	0.259736469993548	0.299618621904654	0.866890276520272	0.386002131650592	0.505700551944684
Ap1ar	390.964654335709	-0.2492590378238	0.132882377306547	-1.87578701462258	0.0606845317782215	0.113193246247061
Ap1b1	2480.19326983758	0.439738588864738	0.122121995594987	3.60081397886023	0.000317222488050723	0.00112520998086763
Ap1g1	2107.0993334952	-0.256249434972677	0.0866739812230322	-2.9564747269805	0.0031117773228064	0.00860697090275133
Ap1g2	726.754491538062	-0.462155914774212	0.115936000013715	-3.98630205216275	6.71110672956377e-05	0.000280595608609834
Ap1m1	795.271974935046	-0.110829882558219	0.0929783686680985	-1.19199641966019	0.233262649145108	0.341191357448999
Ap1s1	1372.0344525755	-0.156258837533651	0.136494344839153	-1.14480081733634	0.25229167669897	0.362494662776178
Ap1s2	894.72159535931	0.864554725873575	0.122214304327576	7.07408785436667	1.50434961752443e-12	3.16592641079347e-11
Ap1s3	128.319719274822	-0.752984503858925	0.25651563412765	-2.93543318098193	0.00333082339600975	0.0091305625002794
Ap2a1	1356.00448086365	0.159926670803499	0.105852173066693	1.51084919818071	0.130826876652791	0.214801858144211
Ap2a2	1968.0926639278	0.315457283543878	0.116330947854443	2.7117227991522	0.00669345417921089	0.0169457092829147
Ap2b1	3368.19867430804	0.00168705797620904	0.10198897485722	0.0165415720529679	0.986802336915634	0.99192551198748
Ap2m1	879.058709817732	0.0710420777181086	0.0885257099851675	0.802502207889796	0.422262511749087	0.541048025897196
Ap2s1	1616.83371227824	-0.0683788007206966	0.125966454286961	-0.542833416307205	0.58724450325784	0.691732691267308
Ap3b1	2166.09591499187	0.0991634018029475	0.0936415752881773	1.05896768073131	0.28961449886251	0.404372263444223
Ap3d1	4437.37750530888	-0.420056211264885	0.129128674618471	-3.25300490000382	0.00114191528029737	0.00354752006974632
Ap3m1	721.604200009039	-0.145897598351953	0.0978295540460857	-1.49134481675367	0.13587098817889	0.22135573581139
Ap3m1-ps	227.807282007893	-0.18984630636696	0.145833330226716	-1.30180327139084	0.192983645211749	0.292790738395402
Ap3m2	175.761657093404	0.275116189151213	0.153851168716809	1.78819694023654	0.0737442397831828	0.133862867109672
Ap3s1	370.65264933419	0.0288329304638462	0.143373361006809	0.201103819157011	0.840617395747013	0.889603929152048
Ap3s1-ps1	99.8742236212899	0.156936947423359	0.203622452737442	0.77072515979227	0.440869855612882	0.559252810491696
Ap3s1-ps2	66.2787071174951	0.0592527549992292	0.215054183736534	0.275524772267721	0.782913096516179	0.848004244741898
Ap3s2	549.840219666539	-0.160166414118044	0.111947566977257	-1.43072706663275	0.152508452793687	0.242921007265986
Ap4b1	40.2299310095938	-0.302684633989915	0.306192122447783	-0.988544811571806	0.32288589937704	0.439869998231224
Ap4e1	339.272181963472	0.181923495567989	0.131016800358968	1.38855089629378	0.164969357823381	0.258290540956364
Ap4m1	148.969948933566	0.586584392772704	0.199017734161044	2.9473976037635	0.00320460865020627	0.00882687674827006
Ap4s1	113.115733311438	0.423765088510637	0.174380060848909	2.43012352701153	0.0150936776111575	0.0342877134903281
Ap5b1	349.436642747545	0.397599336795249	0.145521464434918	2.73223842502676	0.00629056000716616	0.0160159210378689
Ap5m1	220.709714480385	0.0427015340954996	0.130951231146145	0.326087305340746	0.744358301428421	0.818787625511466
Ap5s1	352.723904140007	-0.646280493752669	0.138353242447066	-4.67123489353665	2.99394327656337e-06	1.67015851664672e-05
Ap5z1	645.89087373878	-0.277327393645375	0.101328285790843	-2.73691981938609	0.00620174067246876	0.0158121771399958
Apaf1	1252.26553845962	0.987613960681083	0.144723993463949	6.82412043119236	8.84656463591284e-12	1.56808473159103e-10
Apba1	130.330668867798	1.51350559317521	0.20100594531367	7.52965585576775	5.08742286610695e-14	1.45843318382588e-12
Apba3	277.903384439034	-0.313297533560601	0.143808699664575	-2.17857149318052	0.0293635158044592	0.0610708719879556
Apbb1	699.733629868835	-2.13524877379756	0.275359379083419	-7.75440728006106	8.87570451765616e-15	3.10279837096397e-13
Apbb1ip	2264.29066886215	0.216768586281279	0.105320632977603	2.05817777725828	0.0395730710360245	0.0787394622906512
Apbb2	1729.38016520146	-0.980255336881771	0.176482043290596	-5.55441969394971	2.78535527631758e-08	2.38785396133902e-07
Apc	2091.48503195563	-0.363977394769333	0.114617091121997	-3.1755944179557	0.0014952985173968	0.00451820692471518
Apeh	717.311128161477	0.0465944523128602	0.112672594661033	0.413538469164006	0.679212143718814	0.766145453858678
Apex1	59.5336099191486	0.539206742090653	0.256459882129394	2.10249937578386	0.0355095542725669	0.0717699290826166
Apex2	176.311470075776	0.0721628843206608	0.15727960194001	0.458819093070857	0.646364082632418	0.73983555979345
Aph1a	276.853338212488	0.0388371887147902	0.134740058743395	0.288237878749581	0.773164655513288	0.841282828085313
Aph1b	287.1992642137	-0.567138877309188	0.190340481619978	-2.97960198735602	0.00288623132171735	0.00807541600351552
Aph1c	711.851716225929	1.16984828942133	0.144356963656732	8.10385768575132	5.32433834608292e-16	2.50961790582223e-14
Api5	2042.77817142292	0.158069948339365	0.0862572871227602	1.83254022485546	0.0668709745224783	0.123379447935111
Apip	163.555610574065	-0.0943603719496495	0.167083290096232	-0.564750501952066	0.572243478696719	0.679211938073961
Aplf	90.2895030114663	0.000717471446878579	0.207508193212849	0.0034575571969953	0.99724127399105	0.998749119304263
Aplp1	38.0177388055246	-0.0711885840608113	0.298054029772731	-0.238844561555143	0.811226114890402	0.867624278619332
Aplp2	6755.89481681633	0.21888774961539	0.124158899527055	1.76296464006346	0.0779064536247576	0.140019242151999
Apmap	415.195029645739	0.0893646415685939	0.123030396995859	0.726362295422012	0.467616699125111	0.584695097713813
Apoa1bp	399.378826685482	-0.397970483003723	0.109974152636597	-3.61876380460772	0.000296013651509989	0.00105773191489302
Apobec1	3145.95323853045	1.38460375744693	0.179796666973668	7.70094229638702	1.35066477142124e-14	4.44976862521892e-13
Apobec3	1011.31379118157	0.905036112187872	0.249927227565765	3.62119854248263	0.000293241360190313	0.00104961391296789
Apobr	975.149927044029	-0.199273258330105	0.133197951021825	-1.49606849656008	0.134635806435659	0.220050860258802
Apoe	2497.8596183529	1.25164229974298	0.462935321516093	2.70370879379846	0.00685703531866509	0.0172868168039664
Apoo-ps	215.918720101915	-1.40898503069915	0.193760951527391	-7.27176977400406	3.5480793565932e-13	8.6035797115078e-12
Apool	168.961128990552	-0.307649707210318	0.157667434940443	-1.95125713389406	0.0510264655389824	0.0979512002452858
Apopt1	141.803316993659	-0.192399036070225	0.204864276659514	-0.939153664110964	0.347651855077167	0.465694368935194
App	9461.22651577183	1.20761238619787	0.114166316731588	10.5776591622645	3.78291189695074e-26	1.13352252912203e-23
Appbp2	911.193222870405	0.0192472705243742	0.0877579481113216	0.219322248737618	0.826399031795063	0.879140474652652
Appl1	1002.13888855029	0.35630846352079	0.102428009890214	3.4786233170272	0.000503996486678777	0.00170185022400118
Appl2	1074.71777605714	0.175050337325494	0.128624800447627	1.36093767855267	0.173533385072468	0.26925380978141
Aprt	745.43257002722	-0.0471299567891524	0.138747423178393	-0.339681672707935	0.734096265007363	0.810721393025613
Aptx	203.123667974309	-0.109649055379569	0.132288024338587	-0.828866074066736	0.407180194514804	0.525845330730508
Aqp9	25.9184003736454	0.730709911197593	0.605064975977041	1.2076552770513	0.227179887386406	0.334188643394134
Aqr	1178.54286534673	0.102341745452467	0.0803807565894887	1.27321201982627	0.202942816454307	0.305068722536725
Araf	739.903673222543	0.121251945191942	0.101666144225278	1.19264821259734	0.233007175479966	0.340896919718132
Arap1	5468.01324991625	0.379500828791449	0.0883579935884502	4.29503674063799	1.74664407698233e-05	8.28865599880188e-05
Arap2	785.157486218113	-1.37152742841731	0.197598131221531	-6.94099392508758	3.89350758134211e-12	7.53842967864469e-11
Arap3	1411.9630310819	-0.629938677924485	0.142876127676347	-4.40898481901377	1.03856304182413e-05	5.17079611979735e-05
Arc	65.5887185952016	0.760625798972797	0.423653433950126	1.79539627917271	0.0725905848753873	0.132283885122611
Arcn1	3230.10679058893	-0.338520322668242	0.113506696758172	-2.98238194165288	0.00286014934816684	0.00801692644488404
Arel1	1338.16554391398	-0.298302246468033	0.0845500410076684	-3.52811474616527	0.000418530686353145	0.00144267561976289
Arf1	5954.76539794311	-0.543213734231967	0.111373129608052	-4.87742183544329	1.07481417737173e-06	6.61121037254314e-06
Arf2	758.031891792012	0.56381182896725	0.113268404120907	4.97766198211301	6.43569179364282e-07	4.12388906430727e-06
Arf3	3658.76287954463	-0.0747110299547775	0.10791356555004	-0.692322875015501	0.488734587805054	0.603959621713139
Arf4	1873.42491631557	-0.187760726861158	0.168422634866173	-1.11481884255255	0.264928060243929	0.377034901975557
Arf5	1073.85842632734	-0.184368970143502	0.122405076457189	-1.50621996635887	0.132010715519136	0.216519595309309
Arf6	3271.70114612294	0.182300514061366	0.0739124614715727	2.46643814090105	0.0136464297115699	0.0314395614476865
Arfgap1	767.873783971286	0.148929234062949	0.0946575074410533	1.57334835967124	0.115638177339103	0.194170308447312
Arfgap2	590.316974227797	-0.0463286425186816	0.103046434149306	-0.449589963021477	0.653006126618941	0.745191582234072
Arfgap3	410.806719149539	0.528323564900455	0.119128441528697	4.43490704755997	9.21120237991513e-06	4.64249026636892e-05
Arfgef1	1817.54830081797	0.381908027045848	0.0962901571179211	3.96622083166971	7.30212119613211e-05	0.000301995383678352
Arfgef2	3605.7712139008	-0.471289384614613	0.128988059490648	-3.65374428048345	0.00025844367235523	0.000936514142410185
Arfgef3	1042.11520758575	-0.830802824865141	0.205585184243461	-4.04116098113995	5.31872301948168e-05	0.000227133115711493
Arfip1	87.583525746665	0.100481040885455	0.193766561915868	0.518567496331403	0.604062380318179	0.705699814258338
Arfip2	343.79715225804	-0.203888148547129	0.106883643509769	-1.90757109181531	0.0564466744277709	0.106615848367627
Arfrp1	277.697536407998	0.140417584676827	0.175611759449067	0.799591013251893	0.423947795942052	0.542682434677635
Arglu1	631.003850309731	-0.0677097037677118	0.143930361950637	-0.470433776793625	0.638045137052006	0.733309670935495
Arhgap1	985.051831016518	0.2135949415992	0.0814173768122787	2.62345644089809	0.0087042574509288	0.0212333940724828
Arhgap10	2462.9058482352	-0.531907832159967	0.120889351148756	-4.39995605159174	1.08272803912152e-05	5.36884648240519e-05
Arhgap11a	1046.50909914535	-0.257051592532434	0.150328788274997	-1.70992925228805	0.087278956383712	0.154075700110677
Arhgap12	860.942430439307	0.236897141836642	0.152209453768833	1.55638914647462	0.119615584500006	0.199491403516112
Arhgap15	431.751209845022	1.33068207882006	0.231967484966612	5.7365025922128	9.66515713510625e-09	9.19395332919971e-08
Arhgap17	1459.80145280654	0.634713245732923	0.110825895106729	5.72712040919384	1.02149668463723e-08	9.6730893725805e-08
Arhgap18	1772.24644406342	-0.260604223708403	0.111948480012077	-2.32789425707511	0.0199177192798528	0.0437154686321848
Arhgap19	648.474061549861	0.665128889924781	0.288557298338939	2.30501496151215	0.0211657355011203	0.0460450788732236
Arhgap21	1459.90558803333	-0.0912759166734129	0.0803650159515446	-1.13576679594573	0.256054176937717	0.366770067921826
Arhgap22	369.395973785567	1.53053545027093	0.190706735392498	8.02559724553459	1.01033184491043e-15	4.41493967645756e-14
Arhgap23	602.756961202592	-0.0926312137503469	0.125083208917414	-0.740556742604092	0.458962244446731	0.57685407433957
Arhgap24	238.636483558143	1.61300949723847	0.183111457576251	8.80889442194946	1.26386152061661e-18	1.06749645885638e-16
Arhgap25	814.891482004251	0.634287281100697	0.132961344921784	4.77046378760551	1.83802228050517e-06	1.07226420724682e-05
Arhgap26	179.562154006737	1.28619728782162	0.205495976262018	6.2589901331287	3.87478384184991e-10	4.86182997504298e-09
Arhgap27	456.158784190232	-0.518946629075837	0.11351362354735	-4.57166825318872	4.83856548862043e-06	2.59562432541723e-05
Arhgap27os3	42.4277380006141	-0.18519489145684	0.291939102347775	-0.634361378683097	0.525845008324354	0.637559004619633
Arhgap28	57.8013151982794	-1.38253610840903	0.25587337593618	-5.40320423471438	6.54608528533255e-08	5.21078325843834e-07
Arhgap29	199.774057695883	-1.76611855752702	0.266463621495725	-6.62799127180425	3.40285585680758e-11	5.24815452915728e-10
Arhgap30	2513.88463528727	1.13613459579323	0.161079825500338	7.05323954917524	1.74799536584052e-12	3.63011908896088e-11
Arhgap31	4898.34694578982	-0.441839058111315	0.169798148029434	-2.60214297528571	0.00926432203817054	0.0223741110823981
Arhgap33	46.1236173051236	1.33009299427189	0.40517650778857	3.28274953928465	0.0010279995625496	0.00322386605897999
Arhgap35	592.199420112974	-0.372647249784523	0.105683577759257	-3.52606580592302	0.000421782151549247	0.00145092538623426
Arhgap39	432.402440233968	-0.037881712216949	0.119706549145828	-0.316454801238996	0.751657327021524	0.824316273837237
Arhgap4	866.687165641879	0.352977238079091	0.127824289827176	2.76142537976414	0.0057549665884166	0.0148046010708079
Arhgap5	914.875141748769	-0.253672947849225	0.0988186821206082	-2.56705455289939	0.0102566474849219	0.0244322447324799
Arhgap6	338.679156816823	0.757689565000333	0.13919292956792	5.44344865326378	5.22588023034313e-08	4.22943425716195e-07
Arhgap9	919.728272004063	0.597956579949707	0.104865483464718	5.70212962543476	1.18319794875894e-08	1.09893329779566e-07
Arhgdia	8428.54927507781	0.230962318144457	0.105327615097324	2.19279927615418	0.0283218441256483	0.0592470758512773
Arhgdib	2965.70925984659	0.519226874391858	0.0914361434751377	5.67857364339782	1.35822555650761e-08	1.23954087227326e-07
Arhgef1	3077.16705718206	0.195356836494362	0.113666307481858	1.71868727701515	0.0856713299564163	0.151769944749648
Arhgef10	38.4632944964614	0.333116440584439	0.274636007635131	1.21293796633907	0.2251535386238	0.331565326887495
Arhgef10l	276.844450409806	1.06810535159952	0.301102328020873	3.54731681624686	0.000389176286421154	0.0013533527395994
Arhgef11	1103.80383954936	-0.0384029121632625	0.0871344608963485	-0.440731620626482	0.659407301949585	0.750548350409332
Arhgef12	2158.79101753247	-0.761276382332965	0.182227528313473	-4.17761459741361	2.94582253554809e-05	0.000133404737710949
Arhgef18	131.496859201485	0.24160186348418	0.209090759597893	1.15548799932053	0.24789064415869	0.35751819352935
Arhgef2	3711.86211276075	0.0578047761678188	0.0884273935906381	0.65369761360849	0.513306641025354	0.626390388568222
Arhgef28	54.5199525905737	-1.66589293943598	0.387632941452718	-4.29760415405557	1.72654139669272e-05	8.20253811905543e-05
Arhgef3	587.464355741973	1.62973695294155	0.167247815759159	9.74444386938012	1.94842769022685e-22	3.31364357858174e-20
Arhgef39	76.6112330221901	0.801082418356088	0.353874962431192	2.26374426959311	0.0235898479904834	0.050670462017449
Arhgef4	65.9502618609476	0.823897697124733	0.224966673887186	3.6623099896916	0.000249951138158485	0.000909143084891484
Arhgef40	67.258543263464	1.37846547756342	0.286435446441658	4.81248216548572	1.49067179039385e-06	8.85746198399744e-06
Arhgef6	2371.48780844927	0.282837542397501	0.11677602390779	2.42205148739127	0.0154331637391756	0.034947326048054
Arhgef7	4066.8008369474	-0.334057135278698	0.120934371985406	-2.76230098849822	0.00573955400815988	0.0147718025239921
Arid1a	2678.62880787286	0.271619900815068	0.103401075701228	2.62685759285424	0.00861773912350595	0.0210604060077003
Arid1b	1965.44503920467	0.355653667394371	0.0851276265126277	4.17788774295984	2.94228800229752e-05	0.000133292636821146
Arid2	1459.30888117853	-0.308265173813225	0.0979441676004889	-3.14735610465984	0.00164754176008656	0.0049145089003767
Arid3a	499.352465328008	-0.393673632791518	0.15461543827852	-2.546146990072	0.0108919313655025	0.0257611268999904
Arid3b	130.159757481225	0.0175984808642391	0.217158438603213	0.0810398204068626	0.935410284526918	0.957323530809885
Arid4a	821.230499603568	-0.0143148613194725	0.127884573988465	-0.11193579391963	0.910874315491695	0.940004367401639
Arid4b	861.725670847405	0.280997784944723	0.126741174808717	2.21709941831307	0.0266162985473004	0.0561176272772283
Arid5a	629.763638198848	1.0126201823476	0.191512466948311	5.28748962656779	1.24006391088666e-07	9.34503252605304e-07
Arid5b	790.761583143263	0.297003479642834	0.170928064831134	1.73759341355824	0.0822824812146596	0.146674932873441
Arih1	3371.75261911484	-0.242924980587745	0.107387938107962	-2.26212538268051	0.0236896577715075	0.0508327950646925
Arih2	979.922262890775	0.00131091715826547	0.117385265354732	0.0111676465892372	0.991089692416474	0.994408337643413
Arl1	983.318807180215	-0.0884412196225129	0.113002790083983	-0.782646336048732	0.433834823477702	0.552833595746788
Arl10	52.9387296927302	1.40476386674199	0.268415603167168	5.23354026430092	1.6629376102343e-07	1.21958448862463e-06
Arl11	626.386265536553	0.107137781290476	0.135705288189872	0.789488624353196	0.429826475890397	0.548951309019753
Arl13b	109.633150930318	0.893004459032148	0.192219531016848	4.64575297998139	3.38838257562941e-06	1.86865883936443e-05
Arl14ep	322.276825399274	0.04340412277252	0.112750547643728	0.384957090493871	0.700269206993615	0.783646449405534
Arl15	167.791004809528	0.134636466338723	0.16231519625219	0.829475424651786	0.406835437331711	0.525515738931948
Arl16	52.7359972564044	0.134591098882926	0.234777068141873	0.573271912577057	0.566460599914977	0.674115869142888
Arl2	139.605079621766	-0.105759369912795	0.184497596477368	-0.5732289847243	0.566489661624174	0.674115869142888
Arl2bp	325.630025878736	0.272761276616875	0.150483382764199	1.81256741845231	0.0698985668373814	0.12795250380341
Arl3	33.5959879370882	0.670470008734156	0.363263134199723	1.8456869018961	0.0649376801353217	0.120094152021017
Arl4a	207.088602909008	-0.562417807622169	0.156097467085538	-3.60299124721849	0.000314576125383103	0.00111739783741077
Arl4c	2144.3004328863	1.65851798482639	0.172988727499243	9.58743386810365	9.03029751759211e-22	1.36923246095056e-19
Arl4d	74.9582496362132	-1.20418133575527	0.226365658795103	-5.31962905577142	1.03979034108133e-07	7.96136845730105e-07
Arl5a	1579.28899715698	0.207646264262239	0.0949457053512563	2.18700007013526	0.028742518876073	0.0599676061099766
Arl5b	1069.79514197668	0.413293289636322	0.171152033028723	2.41477289122801	0.015745023586506	0.0355428021230813
Arl5c	286.075825769082	1.00642391390152	0.193229553945473	5.20843677042031	1.90438223773395e-07	1.37660255381285e-06
Arl6	27.8897488106941	0.236722513024703	0.354049476244337	0.668614216114067	0.503741601723558	0.618014043448135
Arl6ip1	2574.82332576326	0.33979736305748	0.119645913430187	2.84002481418431	0.00451100246804989	0.0119266735421025
Arl6ip4	215.940830544177	-0.0327418814719183	0.149816996222759	-0.21854584124244	0.827003845249325	0.879486512798949
Arl6ip5	1863.24385602716	-0.239974825948783	0.109529396999625	-2.19096272345591	0.0284544900802257	0.0594553806507788
Arl6ip6	257.99579936699	-0.0916808280419326	0.158451361578919	-0.578605492110395	0.562855398083146	0.671075399930039
Arl8a	1457.14745464918	0.548298344254146	0.113721309451776	4.82142130527131	1.42538952046029e-06	8.49764429890703e-06
Arl8b	5262.705980906	-0.485901097711106	0.123179935471365	-3.94464484700158	7.9918335044191e-05	0.000327186807589832
Armc1	663.429314837013	-0.354634799003265	0.122166976494467	-2.90286957391735	0.00369760593631628	0.0100009393313003
Armc10	322.141233153713	0.345106360714048	0.140451267920853	2.45712527784741	0.0140053836909882	0.0321169376368598
Armc5	430.285109687339	0.259870783807555	0.14091717952782	1.8441384129197	0.065162971025239	0.120430612894526
Armc6	102.509726530297	-0.406184465315599	0.241392882450762	-1.68266960148856	0.0924390695793354	0.161688073753431
Armc7	159.508991981034	0.111409106109008	0.143597508645151	0.775842890034503	0.43784175626213	0.556382783866399
Armc8	533.772801084922	-0.0847271971815433	0.10367556756872	-0.817233984519866	0.413794724700029	0.532638499575521
Armc9	86.1015856783702	0.0286870851928927	0.190061851026348	0.150935524609386	0.880026576908447	0.920090925512404
Armcx3	133.435892382626	0.371945744074633	0.188284843265546	1.97544177015918	0.0482180365535064	0.0932857786357998
Armcx5	85.5237444966679	0.69171269413721	0.216114319199037	3.20067960651953	0.00137103891336435	0.0041829150847734
Armt1	224.412484880528	-0.371826082987804	0.144613763260651	-2.57116663451754	0.0101356544928182	0.0241860469837158
Arnt	1235.7282970764	0.0374700764274106	0.0965221149698981	0.388201982924807	0.697866565857806	0.78172236148825
Arntl	149.521437802431	0.232515741208511	0.160944365547973	1.44469637328934	0.148543189056044	0.237869453399964
Arntl2	26.6388866524198	-0.871591423427997	0.410696896593671	-2.1222254919796	0.0338188068311872	0.0689134850988489
Arpc1a	659.075120912014	-0.128297524974795	0.0990688766469514	-1.29503361012163	0.195308635321134	0.295605433014608
Arpc1b	9545.20916630059	0.0431698941750426	0.0815206747485005	0.529557616006321	0.596418687242029	0.698876087424669
Arpc2	8236.13450710541	-0.073997931778795	0.104866728306947	-0.705637841224543	0.480413385265679	0.596605728593701
Arpc3	2042.62152107246	-0.0204503275711751	0.138034637311982	-0.148153593687893	0.882221554433217	0.921161392395423
Arpc4	3038.91471856603	-0.162487261601052	0.0960302497603323	-1.69204247626742	0.0906378750652942	0.15904596454221
Arpc5	4437.41726450334	0.0929418742910843	0.0913597181506291	1.01731787457845	0.309002236075239	0.42500471486414
Arpc5l	258.073383178916	0.0815045120134622	0.12705482623398	0.641490877830696	0.521203805764903	0.633158471879981
Arpin	409.587560459528	-1.34787811819796	0.184232138296107	-7.316194289791	2.55102238928903e-13	6.40810713956138e-12
Arpp19	544.248837297194	-0.664859635071272	0.157137184438564	-4.23107768824261	2.32574320727355e-05	0.000107410929407478
Arrb1	3810.5759626881	0.411308759916314	0.0961386449144301	4.27828746995973	1.88336693158235e-05	8.86880417310709e-05
Arrb2	1840.16688136348	1.1131009792075	0.163886211066275	6.79191355981355	1.10655847929937e-11	1.92881419141032e-10
Arrdc1	421.493459665139	0.529062488533501	0.13924461451123	3.79951849764957	0.000144977491466158	0.000556093181987685
Arrdc2	603.444847986617	-0.809745785923854	0.191813654788364	-4.2215231591165	2.4265701802005e-05	0.000111598081048571
Arrdc3	708.373974345846	-0.567235045737547	0.175114153336307	-3.23923015319139	0.00119852817622161	0.00370874774963093
Arrdc4	514.313702692078	0.673659384627578	0.189739959742905	3.55043495076302	0.000384595166389158	0.00133816150649919
Arsa	767.41022919402	-0.648708601028081	0.0980304902284468	-6.61741667838601	3.65530117497013e-11	5.5895462074118e-10
Arsb	5074.15360617912	-1.86611247875626	0.461994123352074	-4.03925587887649	5.36210438744761e-05	0.00022890801803266
Arsg	122.22443495319	-0.732743246393811	0.192565121382455	-3.80517116045385	0.000141706165258268	0.000544707418990624
Arsk	207.182318658645	0.266298395115068	0.148337579397566	1.7952186910193	0.072618863643843	0.13231625871692
Art2a-ps	299.91650212633	1.18336300986274	0.216736797690103	5.45990815807268	4.76380950662905e-08	3.89302224941082e-07
Art2b	29.5657731667799	1.07969773561737	0.360679848384051	2.9935072348919	0.00275790969831963	0.0077525784126318
Art3	47.0175486745191	1.248133865604	0.403655367295541	3.09207796236278	0.00198760640280429	0.00580966449190604
Arv1	61.9683565818075	0.0542160783616814	0.244062421706991	0.222140213075369	0.8242047342886	0.877622183012271
Arvcf	163.812606746965	-1.39554580448038	0.254169571499503	-5.49060926627523	4.00549597877786e-08	3.32953546188371e-07
As3mt	58.9407967873921	-0.27818883858267	0.227882902318832	-1.22075344728344	0.222179384599821	0.328128048292004
Asah1	3602.0484066033	-0.0680835242237831	0.0937205776690392	-0.726452246850316	0.467561571843397	0.584695097713813
Asah2	274.468091361261	0.595680251606792	0.183163453026983	3.25217854196622	0.00114524058266422	0.00355521774366779
Asap1	3502.23734327432	0.457207103944938	0.0990790261944628	4.61457002057706	3.93909960359167e-06	2.15360659421774e-05
Asap2	72.3253054869361	0.477065039203479	0.226989435739697	2.10170591265119	0.035579045328373	0.0718950362006381
Asb1	224.917792178021	-0.226730988218325	0.133814695708236	-1.69436538355009	0.0901958731955813	0.158447105550864
Asb13	91.3026004891243	-0.0497442637114315	0.205946387990548	-0.241539869656343	0.809136719508858	0.86626844874683
Asb2	56.8057232419918	1.5700987783016	0.420461960142747	3.73422313345196	0.000188295502213108	0.00070442892251842
Asb3	158.073472877966	0.3507554106221	0.153025651245141	2.29213473537325	0.0218978695661904	0.0474328207384691
Asb6	399.199131726621	0.0339594092086324	0.113506784588651	0.29918395919417	0.764799687792169	0.834138201059617
Asb7	262.144658679593	-0.0502826216960312	0.142949280541589	-0.351751484900982	0.725024645528068	0.803844169145515
Asb8	484.372775933022	-0.626272908757986	0.122861236603259	-5.09740033612336	3.44349601734451e-07	2.33619392874828e-06
Ascc1	185.712528190105	-0.207673801324955	0.15772208090513	-1.31670721140099	0.187936785444825	0.286619540090053
Ascc2	1215.42901167532	-0.126237868475576	0.126416754935752	-0.998584946589815	0.317995795376952	0.434619579150624
Ascc3	1994.63044274664	0.0956177851801878	0.102217547385112	0.935434156133104	0.349564601325778	0.467708963181471
Asf1a	253.466106719176	0.257636599153253	0.167238807933024	1.54053118613732	0.123430927057793	0.204867021356356
Asf1b	278.246064544031	1.09022341794539	0.20156473303391	5.40880044606802	6.3448277427616e-08	5.06338979978787e-07
Ash1l	2013.82883804819	-0.0265912244184022	0.0991220894099362	-0.268267392028327	0.788493503949397	0.852361342312589
Ash2l	650.636669844093	0.317220557714321	0.101315516776681	3.13101652941807	0.00174202355315822	0.00515601279785893
Asic1	29.0995416595455	-0.375011317551701	0.313895451979703	-1.19470134143883	0.232203738172317	0.33995859061175
Asl	619.418238469974	-0.0996089836488686	0.101338690806941	-0.982931423878691	0.32564119074291	0.442713015609758
Asna1	850.938599469473	0.221421580539519	0.147071598504403	1.50553596201575	0.13218633835504	0.216751148950902
Asns	433.121953986131	-0.776354300514963	0.285695756160367	-2.71741628559291	0.00657937971613555	0.0166904845248067
Asnsd1	84.1013089129191	0.0660014263588099	0.220437570479111	0.299410967991341	0.764626494558233	0.834138201059617
Asph	2353.76742247478	-0.329403145655903	0.122963246052022	-2.67887483644131	0.0073870000664342	0.0184199318082176
Aspm	700.598693607187	0.791038704361309	0.216558710347118	3.65276789418153	0.000259428712805101	0.000939812996733506
Aspscr1	398.093910742884	-0.143396473088592	0.10487378045335	-1.36732434426142	0.171523664414715	0.266859354266187
Asrgl1	50.6841445316255	-0.0916676606976096	0.277987560147568	-0.329754542429699	0.741585437700822	0.816342418959622
Ass1	309.115783291445	1.87727267318079	0.143306797434373	13.099676406072	3.30664431810072e-39	5.20176484291219e-36
Aste1	244.718066519638	-0.536818300170225	0.157788646956903	-3.40213513787749	0.000668615672912979	0.00219185419213593
Asun	337.813912182845	0.0586394467897587	0.15620704204228	0.375395667334171	0.707366226664358	0.789832664587964
Asxl1	1469.17284164709	0.301208004359518	0.149565359495455	2.01388881339647	0.0440212082878942	0.0864825017644627
Asxl2	1789.65511469183	-0.137572097264692	0.0804047989840782	-1.71099360987065	0.0870822924656929	0.153814828165719
Atad1	1127.55491900005	-0.411782790712638	0.113826143458513	-3.61764686214395	0.000297293644558148	0.0010611005436087
Atad2	1553.10144440532	0.54501768596634	0.187167910232825	2.91191842281283	0.00359216436443724	0.00975137802554847
Atad2b	592.261336593329	0.0366525393578401	0.119118556019964	0.307697982434385	0.758312155080315	0.828632323668122
Atad3a	630.058562115017	-0.652833529560655	0.114822654322022	-5.68558124191917	1.30368489883625e-08	1.19758207677768e-07
Atad5	422.527580742483	0.727108224187361	0.236913409220003	3.06908851880205	0.00214712961774361	0.00620901338219287
Atat1	53.0745075438517	-0.224765529573535	0.275174144172641	-0.816811951025893	0.414035901448407	0.532676530334103
Ate1	932.201352742524	-0.0882539668958398	0.0892301536079379	-0.989059901024184	0.322633835086361	0.439579484446122
Atf1	801.148841160484	-0.157982888259322	0.0933211276421022	-1.69289519159268	0.0904754187583702	0.158849490105202
Atf2	937.693666571968	-0.113140246279641	0.101897498252575	-1.11033389651235	0.266855171690371	0.37900601915397
Atf3	5529.2149480244	1.46204945930612	0.162238578102312	9.01172505582556	2.02840332593306e-19	2.04219646854941e-17
Atf4	2879.01789248316	-0.13577149210293	0.0823461171490291	-1.64879045671592	0.0991905707381617	0.171549461588325
Atf5	245.214298308689	0.561078746955614	0.166511713396094	3.36960526987631	0.000752759318022293	0.00244161753023468
Atf6	2596.49310255268	-0.217340548306543	0.0904304861530279	-2.40339909196944	0.016243449301243	0.0365051073285624
Atf6b	700.030475286261	0.59067498761477	0.13119133326243	4.50239335881438	6.71924720031294e-06	3.51024184375004e-05
Atf7	869.620801586204	-0.0638942563401297	0.0975546770902647	-0.654958411486617	0.512494530803928	0.625702723143911
Atf7ip	1546.79053545895	-0.0879718417775143	0.106313903036784	-0.827472600145968	0.407969245965171	0.526572681960751
Atf7ip2	172.115510469072	-1.65576032399507	0.206948857501871	-8.00081886888455	1.23594486376772e-15	5.27266647814128e-14
Atg10	159.630170252492	-0.332629327214953	0.160089168302506	-2.07777534696422	0.0377300554930903	0.0755982723102279
Atg101	223.591139252445	0.101904535695406	0.139404921250611	0.730996687787015	0.464781176067451	0.582306729796801
Atg12	796.018221864527	0.249697155704616	0.113011849617923	2.20947764812988	0.0271414354246865	0.0570623061843768
Atg13	846.586777397534	0.503247431169148	0.104738851188246	4.80478280466019	1.54919585180645e-06	9.17920423492665e-06
Atg14	325.587339902018	0.0490627817391918	0.158577581876978	0.30939292400898	0.757022652352592	0.827894146615231
Atg16l1	792.699899496281	-0.0753110208465891	0.0969494949225771	-0.776806737433049	0.4372728011707	0.55603498057323
Atg16l2	350.167571428309	0.251481027615561	0.172689552503569	1.45626081004735	0.145320534815572	0.233630420369695
Atg2a	2446.96169474463	0.430668175819031	0.132373630148579	3.25342876323359	0.00114021310048165	0.00354310663445963
Atg2b	1064.81733625391	-0.180862847466857	0.108318757019519	-1.66972787025487	0.0949732169675891	0.165407962294092
Atg3	831.641146418174	-0.338623437022056	0.100454740856752	-3.37090548573443	0.000749215572249698	0.00243200360504577
Atg4a	192.388045104841	-0.151399104848922	0.132028719052106	-1.14671342671417	0.251500079433906	0.361563685135447
Atg4a-ps	44.8500829173425	0.112339103906338	0.24992330788882	0.449494306294603	0.653075114482803	0.745191582234072
Atg4b	566.636161395769	0.021998369081961	0.106521424234279	0.206515912081485	0.836387936585087	0.886320493594082
Atg4c	485.321800119585	-0.134281920393533	0.123332231688057	-1.08878205279842	0.276250007822474	0.389797774239919
Atg4d	201.146404802871	-0.0701279550955984	0.136192317008397	-0.514918584513653	0.606609913590563	0.707786553174229
Atg5	682.597060129939	-0.191180869919168	0.0960312162423206	-1.99082004164928	0.0465006751898187	0.0905338795272074
Atg7	1239.05265874658	0.552354406295554	0.106675844084401	5.17787706332596	2.24425032151744e-07	1.59300001671162e-06
Atg9a	511.413083576715	-0.16215391304981	0.123114562374057	-1.31709774963209	0.187805861255549	0.286489304715283
Atg9b	63.6823767883673	-1.40782188066451	0.269565476858703	-5.22256001425004	1.76466337961205e-07	1.28520188845009e-06
Athl1	318.29551147409	-0.268417797353941	0.121757085212601	-2.20453534088185	0.0274867173675603	0.0577014742403246
Atic	1029.94760996781	0.0930783884256545	0.127361529166535	0.730820280148706	0.46488893455369	0.582383758845132
Atl1	33.0210185933981	0.472190147488117	0.285320770355433	1.65494487800483	0.097935679742714	0.169955947264486
Atl2	478.05590511948	0.368891978074571	0.126609225338597	2.91362637349707	0.00357257204672702	0.00970656718654136
Atl3	3394.28858804938	-0.0366678280164947	0.0721911847324964	-0.507926669334587	0.611504770769597	0.712045479287137
Atm	656.855548118326	-0.175363308769944	0.131417796737566	-1.33439544052116	0.18207429352921	0.279883349708698
Atmin	666.932097082738	-0.162177733832743	0.11288872595192	-1.43661585747557	0.150827175281231	0.240727430941648
Atn1	34.9137915381384	0.0103599439660532	0.292204778614667	0.0354543961093632	0.971717410125375	0.981308265641779
Atox1	1609.7281673379	-0.11303910457026	0.139427057908611	-0.810740083494792	0.417514949294343	0.536156482842818
Atp10a	89.8172815393077	1.55999890186565	0.295921168531816	5.27167052497607	1.35187600961369e-07	1.01089480576282e-06
Atp10d	184.480575283017	0.42776623433786	0.193540441978352	2.21021627296742	0.0270901561293606	0.0569640125126154
Atp11a	1212.43045826416	0.500214244097608	0.109074551140694	4.58598489626042	4.51851267632927e-06	2.43744029282486e-05
Atp11b	1522.89975612157	0.0585873918556359	0.100372561935382	0.583699277232294	0.559422653616279	0.668216979476164
Atp11c	716.938811863579	0.300698451334521	0.102709520471151	2.92765899358844	0.00341524393762478	0.00934163115735881
Atp13a1	1167.09119229593	-0.215943133449802	0.0983950245872082	-2.1946550077683	0.0281883544543708	0.0590070593493441
Atp13a2	5994.60946272349	0.0775423944411274	0.136513041517956	0.568021879659958	0.57002011128334	0.677211658689779
Atp13a3	4195.65396043682	-0.179946848445104	0.100044539689047	-1.79866736360029	0.072071314451268	0.131432762261876
Atp1a1	16329.3378065257	-0.722299519843969	0.136161404464264	-5.30473024045178	1.12839739114953e-07	8.57023606977479e-07
Atp1a3	1333.27301213062	1.7124671783009	0.147242724808	11.6302328725165	2.89307245269402e-31	1.45637267268617e-28
Atp1b1	38.790783299039	-2.02194593713613	0.474485426716408	-4.26134465525875	2.03200576539983e-05	9.50308158957891e-05
Atp1b3	5556.40288143856	-0.54433621706452	0.131799647390509	-4.13002787064906	3.62719259612999e-05	0.00016050709853128
Atp2a2	4516.62479498941	-0.141359434173309	0.0968846940074066	-1.45904815638374	0.144551853858204	0.232632363274361
Atp2a3	747.695003160443	1.41368021361446	0.190573525741036	7.41803043270273	1.18874790382196e-13	3.15620092185639e-12
Atp2b1	7543.42075189226	0.634300810556449	0.105369082570792	6.0198000692499	1.74632635756654e-09	1.95009025820541e-08
Atp2b4	1559.34871245847	-2.14095045592411	0.273815606458464	-7.81894970712298	5.32658847381892e-15	1.9774370484664e-13
Atp2c1	2740.29804076484	-0.973512794492193	0.157207074446148	-6.19255079914149	5.91982612756497e-10	7.14980919533639e-09
Atp5a1	13940.1668411565	-0.884627958754075	0.132581023723285	-6.67235727942799	2.51726815513563e-11	4.01518627786843e-10
Atp5b	18691.7362675079	-0.991723637346058	0.139255582622299	-7.12160775655145	1.06675284304448e-12	2.31866744900082e-11
Atp5c1	2138.46962102533	-0.782448570235162	0.123063521116254	-6.35808697116679	2.04281806862033e-10	2.67800681183197e-09
Atp5d	2300.87796558849	-0.933892786675852	0.1357365150881	-6.88018832714034	5.97734860017727e-12	1.098174191726e-10
Atp5e	996.245266709353	-0.359551457657158	0.103576055868114	-3.47137622342931	0.000517797982337761	0.00174225694421847
Atp5f1	1891.93275169279	-0.792788520307856	0.135440242884452	-5.8534192159136	4.815682203799e-09	4.86790044456308e-08
Atp5g1	445.285677641847	-1.17185629648281	0.209823337004039	-5.5849664447013	2.3374534113074e-08	2.03155049594638e-07
Atp5g3	3340.91618424119	-1.09512184331127	0.153077134534883	-7.1540524104971	8.42528743042118e-13	1.88000429630941e-11
Atp5h	519.231075282177	-0.760793931493902	0.149958147514303	-5.0733750990178	3.90821033106908e-07	2.62459055584335e-06
Atp5j	712.276418397115	-0.718909228779969	0.168983643870831	-4.25431250215846	2.09692281112178e-05	9.76675558029889e-05
Atp5j2	726.849972181222	-0.714579468575636	0.163447412620816	-4.37192279227692	1.23157080541853e-05	6.04497604765688e-05
Atp5k	144.342543765103	-0.456188605246005	0.276945936616562	-1.64721176565811	0.0995145262938405	0.171986740745789
Atp5l	62.1647077452845	-0.430734187325652	0.26840208445517	-1.6048093970656	0.10853575731718	0.184484401112468
Atp5o	1245.82748835655	-0.937438018699474	0.130990192196712	-7.15655121180139	8.27319825176716e-13	1.84934635876536e-11
Atp5s	45.6014887739844	-0.37749575982071	0.280621951700709	-1.34521108392589	0.178557077832487	0.275519963771683
Atp5sl	205.977827217615	-0.0933412698509861	0.187981305609938	-0.496545491840926	0.619509599613523	0.718905330671848
Atp6ap1	7891.08697375921	-0.718281449858595	0.142530042874665	-5.03950911240672	4.66727408070347e-07	3.09797702034036e-06
Atp6ap2	8339.46465380943	-0.966529444713425	0.15948736156988	-6.06022593388965	1.35930477164511e-09	1.54533428646375e-08
Atp6v0a1	3307.89972635999	1.24482599720836	0.142246847005295	8.75116758940897	2.11156517109664e-18	1.69261450179944e-16
Atp6v0a2	842.332689035867	-0.194930991863583	0.118776093646891	-1.641163519345	0.100763476178763	0.173737271915294
Atp6v0b	5066.50048326117	-0.893307032852875	0.136252178730211	-6.55627705316687	5.51676954619783e-11	8.05435553815542e-10
Atp6v0c	1812.41561183079	-0.67986311363135	0.130243835614574	-5.21992546075843	1.78995157612629e-07	1.30060857884234e-06
Atp6v0d1	2862.61328476225	-0.127377125937192	0.12316306871229	-1.03421526654834	0.301035538672825	0.41655109996674
Atp6v0d2	13061.2456492027	-1.90387632016505	0.356589589459631	-5.33912479904462	9.33963397934256e-08	7.21542625107588e-07
Atp6v0e	3398.4033463078	-0.944395396672203	0.159854925646214	-5.90782794370886	3.46647781967377e-09	3.5965064600655e-08
Atp6v1a	24928.9373585266	-1.0059358844417	0.184282357736055	-5.45866623804806	4.79724578455439e-08	3.91526188058476e-07
Atp6v1b2	32338.5224744958	-1.4370344533693	0.201662188082454	-7.12594892990916	1.0336604130207e-12	2.25956106708934e-11
Atp6v1c1	6757.72693857963	-1.02856784349078	0.169788818164927	-6.05792451238845	1.37889073318844e-09	1.56477365889779e-08
Atp6v1d	4417.68429575387	-1.29355878385261	0.191923496515714	-6.73997091203838	1.58418343007818e-11	2.6761004654408e-10
Atp6v1e1	6420.4446523423	-1.03614346012522	0.163716770054001	-6.32887797495304	2.46950299084913e-10	3.20729568006567e-09
Atp6v1f	2049.82469420268	-0.785269687621841	0.149340066789688	-5.25826527671047	1.45420644581934e-07	1.08227014314822e-06
Atp6v1g1	2304.32584797572	-1.01524344076247	0.182230616186641	-5.57120127236278	2.52988852552647e-08	2.18672026742793e-07
Atp6v1g2	30.9730040321983	0.0547633402293824	0.325696815918342	0.168142080465142	0.866471505158553	0.909469882603869
Atp6v1h	5451.94929978277	-0.85005707517728	0.155477964953584	-5.46737973725764	4.5673688691819e-08	3.74953276051234e-07
Atp7a	1180.50723878502	0.871777401185794	0.127230122834028	6.85197327305131	7.28381675277175e-12	1.31327842168528e-10
Atp8a1	1102.70997445874	0.682151480779356	0.123698431490921	5.51463322984353	3.4950805899683e-08	2.94021318347266e-07
Atp8b1	72.8283836086657	-1.29601759699381	0.273679005955404	-4.73553896642332	2.18473722226315e-06	1.2531867794978e-05
Atp8b2	237.045255475352	1.28208217358032	0.185514280951961	6.91096214804248	4.81377501073756e-12	9.08266244529719e-11
Atp8b4	1256.77198893551	1.39315497009119	0.169972312277478	8.19636416910583	2.47766962906304e-16	1.26240778468657e-14
Atp9b	2291.02214262659	-0.262700434102245	0.0978681003945606	-2.68422941738067	0.00726972022779759	0.0181706909765308
Atpaf1	114.803019553128	-0.39648687562122	0.166641481811343	-2.37928078478135	0.0173464571328084	0.0386175770416404
Atpaf2	337.371856350254	-0.472229592263496	0.128770369020529	-3.66722248181344	0.000245199440207141	0.000893667812049485
Atpif1	278.093763953982	0.0653605487733717	0.208388919161608	0.31364694934995	0.753789197094689	0.825553654637252
Atr	701.449513434942	-0.265080545729295	0.16605150298148	-1.59637546766957	0.110404989956115	0.186996819229772
Atraid	264.884661788261	-0.204716911103876	0.153635812379594	-1.33248171720584	0.182701945325065	0.280608247731992
Atrn	900.830631207195	-0.0770872723656829	0.119418984041705	-0.64551941204559	0.518590642655696	0.63106393713227
Atrnl1	1542.18772187284	-0.590397889637734	0.121653113234299	-4.85312602317586	1.21530406615537e-06	7.37089237232062e-06
Atrx	3090.94775121659	0.173476622266959	0.105232159983579	1.6485133660093	0.0992473702086753	0.171603937495959
Atxn1	1392.9094891749	-0.162157693851407	0.139761579432536	-1.1602451439788	0.245949011693287	0.355165612410788
Atxn10	1253.81865613368	-0.412963063637497	0.124042614492501	-3.32920315592398	0.00087094850123179	0.00278265724498656
Atxn1l	1230.74603164199	-0.0401928082591371	0.0901543422918145	-0.445822211525206	0.655725676026422	0.747356242781427
Atxn2	1393.86592958197	-0.815130889189576	0.103792819457078	-7.85344201509684	4.04771988707519e-15	1.56259370487243e-13
Atxn2l	2205.58585366735	0.199287731392796	0.0943830902447653	2.11147707577681	0.0347313262969871	0.0705103631952868
Atxn3	1347.86469346689	-0.245026574767984	0.0970986315605659	-2.52348123583129	0.0116199261763897	0.0272982585271354
Atxn7	528.123360640754	0.302537890265784	0.125270077775755	2.41508503576852	0.0157315364811658	0.0355314764205799
Atxn7l1	951.032755456137	0.255247836999986	0.133858067890777	1.90685433475895	0.0565394529792342	0.10675904212208
Atxn7l1os1	82.4776899537773	0.115005280236955	0.220384670893596	0.521838836479152	0.601782546879659	0.703850683316032
Atxn7l1os2	32.3615175728688	0.311981367193026	0.31574312260255	0.988086025822139	0.32311051897339	0.440124457741554
Atxn7l2	52.852703517258	0.401184435382633	0.226902288340371	1.76809338643965	0.0770452929022732	0.138615441197299
Atxn7l3	867.673474268033	0.0227607239208466	0.100516113494983	0.226438559246351	0.820860340696765	0.875023495482703
Atxn7l3b	1036.76977940937	-0.504093383884302	0.0939630372222483	-5.36480512748841	8.10366612198222e-08	6.34232824285735e-07
AU019823	299.531390839569	0.255051758466782	0.161331401387155	1.58091826063496	0.113896728480272	0.191866417440757
AU020206	352.408778961871	0.101952934228177	0.150616323153739	0.676904946910106	0.49846626520908	0.61291078207497
AU022252	195.278210813271	-0.428535187831229	0.138614990847559	-3.09155009289369	0.00199114383392473	0.00581404759859461
AU040320	1038.77280232065	-0.51991566443204	0.114376979915859	-4.54563203902144	5.47706486190011e-06	2.91207694495196e-05
AU040972	45.1011874400592	0.0826992423674862	0.33682059579648	0.245529054338044	0.8060468144161	0.864090208176097
AU041133	42.921978575906	-0.333960859549398	0.299687793913757	-1.1143625677511	0.265123675097303	0.377227976382087
Auh	424.29713984433	-0.419543303538399	0.132971668880333	-3.15513302247837	0.00160424943482991	0.00480358770814522
Aunip	38.6405188160632	0.769807437556868	0.415432787406959	1.85302523270212	0.0638787421006033	0.118391414877242
Aup1	1209.73325914922	-0.111662007081567	0.0945175344467328	-1.18138933410812	0.237448093160665	0.345637010729892
Aurka	323.334669788458	0.731938715162684	0.207155537796552	3.53328094893375	0.000410436055565103	0.00141904883496891
Aurkaip1	450.346803438797	-0.24097180225686	0.104937032930545	-2.29634663309331	0.0216560697373777	0.0469818372082225
Aurkb	317.761745814465	1.22556696994195	0.235553199695844	5.20293068200497	1.96170055253139e-07	1.41478518358782e-06
AV356131	32.8128063150897	0.634778118081888	0.393445210106422	1.61338377435117	0.106661156057815	0.182004680564626
Aven	164.041602280228	-0.378360068819431	0.154234328863384	-2.45315081024906	0.0141610954546595	0.0324326453679508
Avl9	1347.67476148409	-0.253221935050153	0.09928423445683	-2.5504747700931	0.0107576310092297	0.0254865937972809
Avpi1	205.244423823123	-0.32487341074216	0.16984644984366	-1.91274772620328	0.0557803561086973	0.105499816896296
AW011738	241.446331990382	0.129361498779071	0.301270157497464	0.429387032069912	0.667641589476621	0.757083747430153
AW112010	51.8556955232716	1.23673822669735	0.363575824086419	3.40159643399002	0.000669934878079272	0.00219560688558011
AW209491	103.020835119021	-0.720312394528459	0.18782223801898	-3.83507513341241	0.000125525916898327	0.000488027081917037
AW549877	1238.36884897599	-0.565788673214889	0.114896420687801	-4.92433680551515	8.46469358604512e-07	5.30783103041245e-06
AW554918	215.174048626037	0.310764262639285	0.20175413502486	1.54031173934053	0.123484383616013	0.204911783729896
Axin1	852.146115939944	0.441463267536255	0.114312508014699	3.8618981877249	0.000112509454877015	0.000442639420610113
Axl	456.729061525604	2.37569458547173	0.248756652432821	9.55027558956764	1.29351732752654e-21	1.91516653728489e-19
Azi2	1038.24732984072	-0.0248921736962808	0.104221560210173	-0.238839004579123	0.811230424037638	0.867624278619332
Azin1	3726.1700922175	0.0895388140616146	0.0912388491662705	0.981367201360049	0.326411694240356	0.443377352618984
Azin2	131.838544158857	-0.18565762994946	0.191129217497924	-0.971372312302154	0.331362911067597	0.448794902688948
B130006D01Rik	71.4986071665886	0.0611256032019516	0.261874351426881	0.233415769314158	0.815438569186947	0.871236471111107
B230118H07Rik	40.4937546812352	0.0343898581430584	0.265115658238946	0.129716435353144	0.896790778903361	0.931427907278931
B230216N24Rik	92.7823577777427	0.584290095158957	0.20153483525703	2.89920149245551	0.00374114389906639	0.0101034969892169
B230217O12Rik	30.5566166627205	0.894141357755174	0.406733020860221	2.19834956076128	0.02792420513946	0.0585222517369033
B230219D22Rik	1057.49791029719	-0.0961896412191959	0.130224005573505	-0.738647538874095	0.460121049300022	0.577906527489099
B230303O12Rik	45.7842756832367	-0.190894059890948	0.277709068513866	-0.687388643491189	0.491837852152201	0.606900614700995
B230307C23Rik	58.4067218787792	0.115770096767868	0.229971526491197	0.503410567970027	0.614675643091967	0.714745723765352
B230319C09Rik	113.267411373901	0.793444048440153	0.264046296286447	3.00494291947726	0.00265630694307052	0.00749879382650124
B230354K17Rik	185.865018878961	-0.56598937366909	0.173554132620285	-3.26116909533584	0.00110953851881865	0.00345889082470465
B230369F24Rik	35.8862006684865	0.526759290691859	0.336585962540255	1.56500671244975	0.117581335412915	0.196855275531667
B2m	14468.937437105	0.639808711668231	0.188525258650225	3.39375591498474	0.000689411098826418	0.00225519156977596
B330016D10Rik	36.227678785949	-0.360543263382676	0.343043999459275	-1.05101171847047	0.293253207794611	0.408386812005663
B3galnt1	88.2946858558176	-0.778347801929838	0.231868166708582	-3.35685494468107	0.00078834460164204	0.0025430157375994
B3galnt2	166.40665525389	0.0788396136161955	0.152640823937803	0.516504114576326	0.605502365938989	0.706887502350851
B3galt2	171.826811524654	0.496284072845334	0.173873101675672	2.85428895017391	0.00431332802930059	0.0114545754903456
B3galt4	63.4448183710158	-0.0199541882271096	0.215735192288127	-0.0924938950176458	0.926305641500101	0.950938616386228
B3galt6	113.214668470897	-0.375366997284523	0.172553987482403	-2.17535973964556	0.0296031690207978	0.061488014874854
B3gat3	492.809986798913	-0.411830644109075	0.127220020619901	-3.23715278540563	0.00120728755722532	0.00373309924021638
B3glct	111.771243013632	0.722013116708138	0.214092048431986	3.37244247040549	0.00074504649498905	0.0024203433503968
B3gnt2	52.0135275811202	0.519634792956021	0.27960349968621	1.85847027501154	0.0631022607624641	0.11725113711732
B3gnt3	275.437436198225	1.20936429243889	0.174971281501114	6.91178736340908	4.78584868812319e-12	9.05712868271133e-11
B3gnt5	30.3479730772439	-0.0326256258640724	0.442919537838181	-0.073660389928412	0.94128061738532	0.960747491467499
B3gnt8	293.833176029394	0.585272326402979	0.143221118983311	4.08649457955414	4.37939712713575e-05	0.000190758382949999
B3gntl1	95.530632632517	0.203714599591986	0.196056094043873	1.03906282834748	0.298775517188028	0.414216565185915
B430306N03Rik	523.910679017582	1.21622668964928	0.185635027115661	6.55170906345977	5.6882281503071e-11	8.25678792060149e-10
B4galnt1	710.947879718257	0.696545011052574	0.128672572735718	5.41331377964451	6.18689332221505e-08	4.94362237841755e-07
B4galt1	1888.77114790792	0.20461028160583	0.120467051097992	1.69847505804216	0.0894181362961699	0.157256462449315
B4galt2	33.6426238364856	-0.994073190395707	0.288298495458078	-3.44806929642912	0.000564609160219793	0.00188350426286861
B4galt3	143.177127548359	-0.465309104281842	0.172025319069816	-2.70488732006361	0.0068327562397041	0.0172325124802958
B4galt4	62.3712027590673	-0.368668222567086	0.223311576428744	-1.65091406573239	0.0987561232787076	0.171002450669033
B4galt5	1853.38546508895	0.878515973371881	0.118276734130448	7.42763130746374	1.10559611032732e-13	2.9667221851747e-12
B4galt6	1345.48405662757	1.27498335975791	0.163967907242732	7.77581040825553	7.49659129036107e-15	2.70328370742676e-13
B4galt7	511.957905295255	-0.881142398953739	0.164496485180083	-5.35660320030004	8.48010726931699e-08	6.60409343962589e-07
B4gat1	279.440200915508	-0.187780503142596	0.124809315408043	-1.5045391646343	0.132442596979751	0.217114769179388
B930036N10Rik	260.488450351496	0.472453748580822	0.25184416429314	1.8759765583883	0.0606584988459033	0.113193246247061
B9d2	128.582845522757	0.0248777853136599	0.171719632752479	0.144874438146041	0.884810008890625	0.923021707327885
Babam1	593.258648883038	0.258701483407113	0.134520988876671	1.92313099663794	0.0544636004440553	0.103356296432394
Bace1	468.914215592722	-0.127847142405711	0.10511888302024	-1.21621481062632	0.223903103224687	0.330264950080014
Bach1	3360.92888563999	0.700528326551318	0.11645457940894	6.01546396978821	1.79372197241335e-09	1.99416881827049e-08
Bach2	46.5615543763387	-0.875351677930272	0.299306927421496	-2.92459544946505	0.00344904286546595	0.00942179389231365
Bad	308.716879931424	-0.564003489553653	0.13456196419911	-4.19140351369353	2.77234085809368e-05	0.000126504386146153
Bag1	1241.42611533	0.0338330592377959	0.0934890760435913	0.361893182279613	0.71743185488836	0.797745175275668
Bag2	49.9062987517634	-1.39552723208136	0.361946434685363	-3.85561812010797	0.000115437573925526	0.000453003388791003
Bag3	1097.88134168603	-0.247182981599162	0.212703130212608	-1.16210316863738	0.245193560500057	0.354481442721794
Bag4	205.027980001466	-0.121024569390413	0.170557150879523	-0.709583671903046	0.477962347950075	0.594383018671116
Bag5	291.540176154259	-0.103952934213514	0.135786403228296	-0.765562175166683	0.443936858029786	0.56195386826643
Bag6	3344.03501011033	-0.0383768174545398	0.108724556085807	-0.352972859454604	0.72410878762085	0.803216459166931
Bahcc1	154.862974404484	-0.330092242516634	0.262932985520463	-1.25542347554162	0.209325071722332	0.312720326166375
Bahd1	962.9822671895	-0.105753750657743	0.0949298456603856	-1.1140200420854	0.265270588616344	0.377394342950111
Baiap2	2189.63497366278	0.198451839412325	0.161428776634032	1.22934611505002	0.218942064172574	0.324430050556327
Baiap2l1	189.756565969341	0.400531590589257	0.197993079367251	2.02295752896658	0.0430775264697543	0.0849202178292384
Bak1	664.858300812434	0.240733233104983	0.135918334929573	1.77116084617811	0.0765339581496259	0.137912351562578
Bambi	65.955034046575	-0.286805956430156	0.269718764948465	-1.06335188241336	0.287622405035422	0.402505055862424
Banf1	626.826805889694	-0.440156745928162	0.153540823467464	-2.86670825379176	0.00414765171614565	0.0110777157995953
Bank1	136.944315970785	0.849350070323564	0.340387066169311	2.4952477774261	0.0125869203514143	0.0293019594196355
Banp	167.36362078189	-0.0702051847609388	0.158476295149554	-0.443001173738232	0.657764885728376	0.749341095943841
Bap1	1044.39195977472	-0.106275941851077	0.0875176916704535	-1.21433666522259	0.224619189917802	0.331031041396636
Bard1	221.200926077204	0.877088845554113	0.266887022694873	3.28636752996743	0.001014884968063	0.00318591352533622
Basp1	2211.78582654099	0.176753129832556	0.10571712685543	1.67194413138251	0.0945353393665986	0.164759347171949
Batf	37.2483504342482	0.619985197329802	0.346088912595524	1.79140438993023	0.0732284249792841	0.133080105178959
Batf2	40.3255100302417	0.931102197802348	0.362375444714065	2.56944064887465	0.0101862838956656	0.0242838383835862
Bax	541.504048012353	0.976738096662009	0.162882049801572	5.99659752472357	2.01494621515388e-09	2.21661696833143e-08
Baz1a	1257.43985075883	0.432111546452159	0.129890034765483	3.32674902452939	0.000878654714443298	0.00280150903774703
Baz1b	2199.70564412142	0.348299211909941	0.117359852226551	2.9677884327733	0.00299950711530228	0.00835520076274439
Baz2a	1630.31131421422	-0.176082096338168	0.11861876604033	-1.48443709386002	0.13769300013129	0.223825447565928
Baz2b	2284.80421376725	-0.0753025856600032	0.0821862593966098	-0.916243009632696	0.359539451750555	0.478207989883823
Bbc3	624.078294603976	0.623791853256918	0.185468035693274	3.36333886820553	0.000770057752949321	0.0024919456983459
Bbip1	218.919295391087	-0.463509110051924	0.127842720241707	-3.62561989588132	0.000288269110116369	0.00103358027088732
Bbs10	315.953773230941	1.32287758541944	0.254463879844466	5.19868511879962	2.00703181607774e-07	1.44416783335268e-06
Bbs2	65.8473339859102	-0.646486478002536	0.247459832427964	-2.61249056729532	0.00898851726906374	0.021816873641498
Bbs4	73.9169746091642	-0.80518499607288	0.235708189578889	-3.41602469354758	0.000635424846101375	0.00209162483162583
Bbs5	29.3042662712452	0.404090597928407	0.330818769086657	1.22148631120309	0.221901945398526	0.327851136750463
Bbs7	56.0384048438228	0.696564375440483	0.285669369395523	2.43835864137067	0.0147541279319189	0.0335934231210724
Bbs9	257.823937449187	-0.379846248526794	0.155212055337894	-2.44727284681513	0.0143941826177715	0.0329125705386364
Bbx	1885.27983098968	0.263097470391029	0.124314042187598	2.11639381811749	0.0343113274068907	0.0698266583789973
BC002059	49.7619971566012	-0.190480270392266	0.245712745957772	-0.77521526060761	0.438212472115476	0.556779804298159
BC002163	273.826799468429	-0.876327260964119	0.218435341507357	-4.01183826260369	6.02477723516061e-05	0.000254692044019134
BC003331	568.065893003192	-0.200999014087702	0.143833847338894	-1.39743890472538	0.162281626812312	0.255097960708587
BC003965	243.985686375693	-0.67757751846089	0.125489333115815	-5.39948298103989	6.68332235738007e-08	5.30995024416845e-07
BC004004	476.097358468669	0.0951289855070161	0.142122672411206	0.669344193245803	0.503275941956336	0.617563156154494
BC005537	8569.85827792883	0.702725671901529	0.10139606690892	6.93050227019911	4.19349037764283e-12	8.03273613434324e-11
BC005561	152.869708324981	-0.109840921947693	0.204226632767365	-0.537838383071288	0.590688630510429	0.69410050559979
BC005624	451.107992516506	0.101462373335139	0.139026383247377	0.729806609113909	0.465508404056977	0.582863367134444
BC017158	184.727634595784	-0.0339503260931362	0.15411156657061	-0.220297066914707	0.825639804320551	0.878555587839193
BC017643	573.326634642857	0.0406706614854095	0.111290544970513	0.365445793226957	0.714778663390581	0.795497831514898
BC022687	55.2213024478697	-0.0278450278843037	0.290655358676858	-0.095800841281791	0.923678749188326	0.949016006084993
BC024978	144.391450406841	-0.0980649590682695	0.171016439784728	-0.573424164318422	0.566357532838503	0.674115869142888
BC026585	192.964283589054	-0.907339795202006	0.165478018927103	-5.48314393104808	4.17832795897825e-08	3.45949061603561e-07
BC028528	48.7701790958811	0.883422692714491	0.343472829240941	2.57203079110163	0.0101103899274388	0.0241349122224616
BC028777	33.4497288045853	0.235034793144946	0.428045480165064	0.54908836569028	0.582944809042374	0.688404485132838
BC029214	71.724908033533	-0.312244002290209	0.215605058739149	-1.44822205989137	0.147554956987424	0.236678451910111
BC029722	114.133457326606	0.148540970229954	0.212750679883985	0.69819269348965	0.48505669521854	0.600416888888102
BC030336	153.028941700335	0.505335696907894	0.175926851110217	2.87241938179923	0.00407341995847438	0.0109049117586471
BC030867	102.912520805955	1.13455212191057	0.253652778954892	4.47285508396631	7.71820861886969e-06	3.96140519855118e-05
BC031181	743.2574526473	-0.445148068100772	0.156376705469369	-2.84663925336351	0.00441834001737283	0.0117038116435776
BC037032	46.3520593443142	-0.165238607475106	0.366170513420836	-0.451261369823077	0.651801183234389	0.744511965799549
BC037034	588.79579467094	-0.0600204925730158	0.111810353409701	-0.536806214654253	0.591401478441229	0.694808402369574
BC046401	27.5028300127192	0.492717076352624	0.345789603096007	1.42490425374595	0.154184879879059	0.245187858640126
BC048403	163.010953219508	-0.227951644412091	0.148208836837434	-1.53804354231674	0.124037968759663	0.205640605564531
BC049715	50.7077455231211	0.330906991073016	0.324327026985667	1.02028805353813	0.307591867419331	0.423574094700982
BC052040	75.5326455539529	0.279046030222242	0.253927721208455	1.09891912901139	0.271803342071971	0.384731195588321
BC055324	93.4728891486608	0.905237501191708	0.285584488050732	3.16977125533127	0.00152558986350761	0.00459869423526784
BC065397	26.9221998566492	-1.10817999132221	0.331427109079896	-3.34366127864049	0.000826806197870214	0.00265172171258834
BC068281	40.3318361041491	0.189464972268366	0.304704199427832	0.621799675305232	0.534073599867271	0.645287658825807
BC100451	137.954347550197	-0.472229013880796	0.289963695265137	-1.62857978978713	0.103402005523065	0.177411620928122
Bcam	95.3371445043079	-0.32989838823965	0.207052897172856	-1.59330486433251	0.111091815983013	0.188016474468291
Bcap29	625.653118724103	-0.309251786426865	0.143934633605149	-2.14855715181951	0.0316695213585393	0.0651562737121493
Bcap31	1376.47284748868	-0.0885573234213047	0.114718955704269	-0.771950222852396	0.440143909850691	0.558557134765649
Bcar1	243.757685356838	-1.74127299057038	0.216571213943466	-8.04018668438976	8.97017063054926e-16	3.94718871977142e-14
Bcar3	1556.13233203502	-1.6612145274792	0.19670204688808	-8.4453342187354	3.03176802580166e-17	1.91732666355346e-15
Bcas2	503.570299907512	-0.000979064736205004	0.107938917715719	-0.00907054431269718	0.992762851974077	0.995372888152785
Bcas3	633.433840629756	0.0310475479576941	0.120638130723367	0.25736098339329	0.796900119399344	0.857325013048448
Bcas3os1	61.1757371753016	0.482940267706571	0.243259984973999	1.98528445916902	0.0471128320866884	0.0914004920319059
Bcat2	1074.13343035212	0.288829102462508	0.121935551107552	2.36870297332522	0.0178505826939121	0.0396517497637754
Bccip	207.114720978921	0.0105233161440631	0.166370002291624	0.0632524854187183	0.949565451095875	0.966108651073807
Bcdin3d	32.532268933941	0.216698277972308	0.291447137106709	0.743525155620133	0.457163797348637	0.574995641578312
Bckdha	184.969270210913	-0.217622461161463	0.150459977186582	-1.44638105914103	0.148070351416209	0.237233020060214
Bckdhb	86.868868530125	0.242863687724761	0.193136466237092	1.25747194435371	0.208582791970063	0.311833504032222
Bckdk	688.461925891739	-0.0618754358123361	0.112893399565487	-0.548087275699796	0.583631977174107	0.688988141833685
Bcl10	1026.54078589081	0.483509863636632	0.138144624861814	3.50002661428403	0.00046521170858424	0.00158320425974383
Bcl2	261.758653528257	0.751955173194792	0.180091176681913	4.17541373791419	2.97444952901582e-05	0.000134555885415759
Bcl2a1a	105.903710222458	0.152773952091525	0.233416874114011	0.65451117307356	0.512782531136083	0.625993612799263
Bcl2a1b	65.4973877755388	-0.229382175332104	0.292478645276934	-0.78426982289566	0.432881802597265	0.552013120446507
Bcl2a1d	80.5113674910493	1.13460105858609	0.226487947847358	5.00954275655656	5.45595049968404e-07	3.55031732360515e-06
Bcl2l1	902.497800768644	1.15488118248078	0.119973623224893	9.62612573862115	6.20240032717943e-22	9.63669236019175e-20
Bcl2l11	3360.16298770097	0.0473397932348379	0.140899721375882	0.335982163573965	0.736884316840037	0.812427838648884
Bcl2l13	1021.63094242969	-0.650657636635769	0.117030845673781	-5.55971062919134	2.70222303039199e-08	2.32132947696131e-07
Bcl2l2	302.185755456113	-0.137142055786168	0.119579039030097	-1.14687370711894	0.251433820804185	0.361549039395867
Bcl3	404.195837577305	0.138961048734059	0.15638197850469	0.888600144740408	0.37421801326426	0.493765327839244
Bcl6	467.695855094961	0.864411305802869	0.134013925989096	6.45016030552824	1.11731902931017e-10	1.53509388470179e-09
Bcl7a	77.1773568112071	-0.3856149319752	0.28717508136517	-1.34278688158481	0.179340992388494	0.276526025096001
Bcl7b	371.686450769986	0.0172608733028489	0.118594925362746	0.145544788278698	0.884280756262857	0.922622559904498
Bcl7c	93.728087843673	0.0805445048393191	0.204661861375709	0.393549165916454	0.693913918153272	0.778542093247654
Bcl9	184.218352295515	1.23905686632101	0.186424220468743	6.64643715932154	3.00272560550344e-11	4.70601516130271e-10
Bcl9l	230.117934258131	-0.117696444368206	0.131986547803165	-0.891730606847374	0.372537344150509	0.491960385743353
Bclaf1	2328.1483014621	-0.0540927276700301	0.0862799543016839	-0.626944324528627	0.53069573110763	0.641822580817752
Bcor	1025.40295230102	-0.357661615931005	0.10801110294786	-3.31134120631709	0.000928499197362332	0.00294633444246217
Bcorl1	132.396968328665	0.269152881235955	0.177803970324767	1.51376192974958	0.130086231491262	0.213864823424889
Bcr	394.722491891633	-1.67004495990024	0.249421498658528	-6.6956736643886	2.1468032473492e-11	3.49063551264725e-10
Bcs1l	114.103404160996	0.0171049295986192	0.168853851689614	0.101300203859497	0.919312154371332	0.945765017801293
Bdh1	1315.98606066592	-1.86790557294018	0.278067236754401	-6.71746011771239	1.84919354865931e-11	3.05809471877496e-10
Bdh2	260.846263873129	-1.8670752739094	0.296959349696197	-6.28730927589752	3.23015471386076e-10	4.09793317277598e-09
Bdp1	1090.38282780171	-0.0271080870198504	0.0849967838420576	-0.318930738252674	0.749779034773151	0.823023912134331
BE692007	82.3308037150455	1.12205223493572	0.2966735269167	3.78211108553265	0.000155503934072682	0.000592676259934797
Becn1	652.391997193415	0.121439781429116	0.101326670910461	1.19849769402202	0.230723320197937	0.338302806092397
Bend3	304.359475734686	-0.503216608092242	0.167613626630121	-3.00224163279224	0.00267999358586485	0.00756057370054003
Bend4	288.806854734482	-0.766483814216834	0.155207056190042	-4.93845984217574	7.87419889652338e-07	4.96476919402539e-06
Best1	225.941256385252	0.936355900153377	0.210800452310111	4.44190650395709	8.91653048639835e-06	4.50841848820101e-05
Bet1	332.444654007066	-0.667366243316536	0.145012286727297	-4.6021358491612	4.18180288262382e-06	2.27728209769886e-05
Bet1l	208.819593205764	0.0607289663790677	0.149448813923432	0.406352949781062	0.684483285096222	0.770502875038994
Bfar	497.874559484946	-0.596619451516407	0.15050961022522	-3.96399572508118	7.37055727396255e-05	0.000304225855338861
Bhlha15	47.1111540760583	0.713290332196242	0.252765733007828	2.82194237212586	0.00477337538808658	0.0125047729515132
Bhlhe40	7480.02869162592	-0.288172322603805	0.133747700229907	-2.15459646863795	0.0311934256260493	0.0642818505819274
Bhlhe41	986.417753636455	1.25765326743475	0.174130028795608	7.22249502933794	5.10422709184282e-13	1.19621411454082e-11
Bicd2	1230.53400755392	0.322980308461639	0.0911771470951653	3.54233839017283	0.000396596354956565	0.00137725307039966
Bid	375.70659013023	0.610922579003598	0.193774003291883	3.15275820608073	0.00161735713279049	0.00484053258410663
Bin1	1082.20291692751	1.12547181117104	0.18135789077632	6.20580558338733	5.44174186452774e-10	6.61684264396924e-09
Bin2	424.608824720162	1.22693826935591	0.175753159827607	6.98103106970817	2.93021495423345e-12	5.83492962009937e-11
Bin3	634.364597768548	0.407775349562883	0.138161037310529	2.95144968147837	0.00316286075451833	0.00873290974015207
Birc2	954.118213820443	-0.593460132250933	0.12996654890285	-4.56625291092821	4.96519672035472e-06	2.66000076529174e-05
Birc3	2890.95019077787	0.260302715170086	0.120586623471145	2.15863673496401	0.0308783604775448	0.0636742858610358
Birc5	269.014046578127	0.982339426373927	0.255886241495682	3.83896930382834	0.000123551874313298	0.000481393293570545
Birc6	7521.40032277238	0.0396068715237277	0.0921999548010676	0.429575823645296	0.667504226741492	0.757010065201556
Bivm	219.105740300702	-0.491293341162364	0.134663932829401	-3.64829194306064	0.000263989561586891	0.000954686388669835
Blcap	719.950693395498	-0.320210620108301	0.132354315603927	-2.41934400587691	0.0155485281020777	0.0351749462816194
Blm	238.289952094504	0.784956333661058	0.247308578844523	3.17399556994156	0.00150355985610301	0.00453989942155862
Blmh	386.753884430074	0.494869511387431	0.126713856365868	3.90540960223455	9.40659178960063e-05	0.000378579973367841
Blnk	773.998804917903	1.09833286260344	0.141551304008695	7.75925640738692	8.54287791489503e-15	3.01160151450864e-13
Bloc1s2	64.3043029448442	0.0199601701246878	0.231031489914849	0.0863958853922662	0.931151717683572	0.954589798553906
Bloc1s2-ps	58.0452180764322	-0.343471167486887	0.24395452984195	-1.40793109154157	0.15915147548519	0.250992646488861
Bloc1s3	201.279021468118	-0.0987622472720232	0.170081457706832	-0.580676157199091	0.561458733937158	0.670096038851585
Bloc1s4	147.382115062908	-0.11674833190703	0.165675580908855	-0.704680383594117	0.481009161655089	0.597051020754442
Bloc1s5	157.808931529661	-0.582676758346987	0.169548037071482	-3.4366470317868	0.000588962586061407	0.00195518178464332
Bloc1s6	481.937167002437	-0.319523793108703	0.120048223333352	-2.6616286708504	0.00777636129306098	0.0192345728917399
Blvra	760.263188371669	0.246668208491995	0.137706273869264	1.79126340115903	0.0732510362918445	0.133101976860073
Blvrb	1796.84453723487	0.860570529880348	0.13801700990662	6.23524977437631	4.51057810880859e-10	5.59267246299075e-09
Blzf1	233.780996021298	-0.0921024147455372	0.142218595237188	-0.647611619225542	0.517236180240709	0.630146885607873
Bmf	433.155374825985	-0.934835803183841	0.162021999776679	-5.7698078314819	7.93619811049578e-09	7.69468822962938e-08
Bmi1	477.602758140825	-0.198901190009838	0.1218502787388	-1.63234087002956	0.102607698016002	0.176361360220075
Bmp2	485.839875356496	1.02758589998534	0.209464545260808	4.90577485896658	9.30592215777012e-07	5.79777377997708e-06
Bmp2k	1205.66328913616	0.149526842377877	0.126060672655596	1.18614980570817	0.235563144531777	0.343807964589678
Bmpr1a	103.222046400519	-0.364008547005348	0.248136567258703	-1.4669685771297	0.142384603568383	0.229849953297601
Bmpr2	2170.17523084673	0.111929742676951	0.126007372441286	0.888279316586059	0.374390522660167	0.493902400962576
Bms1	703.802931361639	0.11229763561907	0.105831752572212	1.06109587047089	0.28864633437508	0.403623790901153
Bmt2	1168.19475249361	0.656658920398947	0.0976838558581	6.72228706197716	1.78894065396973e-11	2.97408429725351e-10
Bnip1	208.469206270991	0.388227468809604	0.149562569380719	2.59575287063537	0.00943839233272887	0.0227334291880178
Bnip2	1795.28708512441	-0.349026315152652	0.100715357642365	-3.46547262823638	0.000529300402533336	0.00177496016836387
Bnip3	117.548767633746	-0.641226663382916	0.187080215058096	-3.42754931719417	0.000609055664489162	0.00201550500594165
Bnip3l	977.086623572502	-0.25646073938436	0.132412188614029	-1.93683634466554	0.0527653516275879	0.10072075689871
Bnip3l-ps	204.798303701007	-0.136260854139354	0.166550892837053	-0.818133435481886	0.413280998804333	0.532249423859243
Boc	130.680069677107	-1.89833215113853	0.229659782084279	-8.26584495513409	1.38708733875714e-16	7.55893544676027e-15
Bod1	226.486142140745	-0.556569812709295	0.13464294616107	-4.13367226860503	3.57012470167872e-05	0.000158260018917318
Bod1l	1086.34707972376	0.177498104443521	0.111010878687547	1.59892531742866	0.109837197817877	0.18634418098382
Bola1	51.05046358058	-0.0166536452994995	0.335215228413255	-0.0496804556831434	0.960377031329829	0.974212996482527
Bola2	247.986097838714	0.327751934851149	0.171683097880051	1.90905184551211	0.0562554038525632	0.10630244106374
Bola3	259.815058078988	-0.730861036936361	0.158124098084272	-4.62207244683759	3.79925276101595e-06	2.08247369326593e-05
Bop1	678.824645441448	0.0760339182238431	0.146210410178048	0.520030811289379	0.603042100258656	0.704996268625656
Bora	188.581758288933	0.168632470989192	0.245157718312072	0.687852995819338	0.491545359063272	0.606658632472745
Borcs5	94.8282273564226	-0.377977049345138	0.183832739357344	-2.05609213389572	0.0397736363149014	0.0790885152509139
Borcs6	201.414370873881	-0.103540750684226	0.178895539230129	-0.578777710891008	0.562739172578383	0.671075399930039
Borcs7	99.0063318668471	0.224956061684811	0.235027047162213	0.957149674477886	0.338491714024663	0.45619171353613
Borcs8	143.354328154183	-0.0409856062409504	0.157035075453563	-0.260996507452694	0.794095200589964	0.855331059519402
Bpgm	78.8001998750393	0.353893121742707	0.217885044303528	1.62421942668865	0.10432898619958	0.178734044557816
Bphl	170.576883272662	0.187215629635	0.159828418320314	1.17135382807705	0.241456583182632	0.350286005689155
Bpnt1	415.25924945535	-0.623232080893744	0.141042943578463	-4.41873988929503	9.92780440655668e-06	4.96982571426077e-05
Bptf	2115.86346414729	0.109414716898565	0.0895599597551271	1.22169234106095	0.221823993690529	0.327812935720445
Braf	1293.35030835715	-0.153636697982747	0.143725203487415	-1.06896142259559	0.285087052803347	0.399623586492551
Brap	1458.03009905413	-0.478661680947362	0.119827943084781	-3.9945747930322	6.48104603975407e-05	0.000272333770985993
Brat1	259.459801293668	-0.155091199643025	0.118796494518241	-1.30552000100652	0.191715841090977	0.291253483839926
Brca1	779.409892559686	0.408840180534064	0.199591253324159	2.0483872600873	0.0405220688560068	0.0804496350454086
Brca2	251.849861189712	0.540167944826623	0.2153315569136	2.50854056214046	0.0121231048647561	0.0283533311137253
Brcc3	381.753350692227	0.0376443085776431	0.134437293821629	0.280013882365034	0.779466854183952	0.845654341371124
Brd1	1455.14751699038	0.104016698464084	0.111382839296103	0.933866465619208	0.350372778926859	0.468650204717432
Brd2	7306.99812107764	-0.408312283053713	0.157944538098114	-2.58516241188455	0.0097333136780582	0.0233811323990003
Brd3	486.559821147334	-0.23666271913318	0.126394052764501	-1.87241973777147	0.0611485564591896	0.113991198791127
Brd4	1766.24277832624	0.15941514908529	0.116526808095021	1.36805557185858	0.171294681929287	0.266634950164511
Brd7	1143.21193315649	-0.0945896695276123	0.124779301366305	-0.758055771204654	0.448417595846631	0.565974871500336
Brd8	879.39979490989	0.132681551086549	0.132945745617892	0.998012764303854	0.318273169152629	0.43485700073671
Brd9	428.648935338695	0.0546114567168073	0.129463484735071	0.421829034098395	0.673149811757109	0.761422827697575
Brdt	37.3539154870903	0.190380109626024	0.285035951228582	0.667916130598383	0.504187130160201	0.618088449966222
Bre	402.240076334907	-0.147762456895836	0.120630714534089	-1.22491570630696	0.220606982004387	0.326282626457306
Brf1	453.853437648267	-0.103924334997948	0.127248478757937	-0.816703948152037	0.414097634514811	0.532701495489001
Brf2	98.5376744187008	0.154768684961048	0.175167241879603	0.883548106942422	0.376940202511412	0.496108810772445
Bri3	998.208609634229	0.787004010349374	0.118762495780502	6.62670487999783	3.43262932358232e-11	5.28112958890996e-10
Bri3bp	628.426720618849	-0.568145284074306	0.119980547885757	-4.73531163247631	2.1871876378997e-06	1.25402079375707e-05
Brip1	254.943034912895	0.707558145621638	0.253856772089492	2.78723368219699	0.00531601293359066	0.0137897147523137
Brip1os	1239.73463921992	-0.468027118384785	0.114702797916331	-4.08034613703307	4.49686873759444e-05	0.00019535068368183
Brix1	374.116084287345	-0.228104160184743	0.139322914921366	-1.63723361884501	0.101581665001774	0.174980188071082
Brk1	1173.3845765346	0.140178612529693	0.101803519456502	1.37695251871511	0.168526928228059	0.262840841906862
Brms1	578.892014180527	0.0378509697181449	0.107591242722472	0.351803443852584	0.724985675650814	0.803844169145515
Brms1l	105.133334010579	-0.0288713296278563	0.177338300554006	-0.162803689545136	0.870673003191981	0.912949973247814
Brox	1010.81809155938	0.242869531648614	0.0952835157058918	2.54891446699208	0.0108058799202669	0.0255864532072548
Brpf1	1287.31341478691	0.274257853492742	0.0988328828153288	2.77496563573075	0.00552075409116548	0.0142608149091374
Brpf3	473.006410752893	-0.155869133487622	0.0984473774620532	-1.58327359758976	0.113359117987334	0.191210896645302
Brsk2	74.4525456817774	0.689965306801486	0.213451036400031	3.23242893751246	0.00122742660218373	0.00378732266130323
Brwd1	1271.41301822963	-0.0861968547826684	0.087820469085579	-0.981512119898513	0.326340260627673	0.443328171416155
Brwd3	427.45946822193	-0.127517509015329	0.116225580326879	-1.09715527904177	0.27257351879968	0.38560451147639
Bscl2	566.73831506967	0.311150764759357	0.120832884421512	2.57505037845444	0.0100225487241961	0.0239570324205144
Bsdc1	736.66970810299	-0.410903004964839	0.111041866708948	-3.7004331532165	0.000215231771810411	0.000794104910065677
Bsg	2126.24238894134	-0.558683160595249	0.119923579078379	-4.65865983060851	3.18274639505283e-06	1.76530909571352e-05
Bsn	82.6280250738417	1.22190334926116	0.251919777071886	4.85036690435181	1.23233303328083e-06	7.4669769975153e-06
Bst1	339.872531902864	1.20426719854856	0.198936344981537	6.05353033232981	1.41705374723009e-09	1.60374293245419e-08
Bst2	893.371272694036	1.37760138177042	0.205478058135396	6.70437220534114	2.02274084550531e-11	3.31029824976389e-10
Btaf1	1910.69317285945	0.311950861956361	0.104723819948802	2.97879567522335	0.0028938367858322	0.00809309687771072
Btbd1	479.496699465402	-0.429782025526774	0.135690312652128	-3.16737442140483	0.00153822128960259	0.00463011598413025
Btbd10	388.201898758952	-0.0087595568194683	0.132225469928941	-0.0662471218606806	0.947181081324546	0.964891849479473
Btbd11	476.871141886758	-0.850908336144933	0.199863906278917	-4.25743873412271	2.06782302348616e-05	9.64236611224468e-05
Btbd19	135.822701224232	0.24595046607866	0.200179233696105	1.22865125186781	0.219202590713798	0.324663364026497
Btbd2	367.296814901086	-0.0561807813349826	0.129210815310993	-0.434799371861891	0.663708060897449	0.753745510453066
Btbd3	76.6941265425309	-0.449995157947373	0.269855098258958	-1.66754365898824	0.0954063506477671	0.166116342404835
Btbd6	200.323219551935	-0.386219166073736	0.158916124542812	-2.43033340502642	0.0150849391864124	0.0342740494062106
Btbd7	603.872528796792	-0.247625105123499	0.108090189260257	-2.29091193954036	0.0219685073011566	0.047536737342685
Btbd9	853.97367951864	-0.0456902959538597	0.102337216557987	-0.446468034705346	0.655259197657958	0.747018559402704
Btd	122.473858851459	0.279732501710952	0.173328398984512	1.61388729919525	0.10655187403618	0.181849109675255
Btf3	447.301507748074	-0.0481151576270599	0.114965724465842	-0.41851741334745	0.675568857701331	0.762993275973369
Btf3l4	179.794015647821	-0.574324653584682	0.169676996096254	-3.38481153484637	0.000712271408798266	0.00232346699837381
Btg1	7163.53178465755	0.832277568593427	0.175638699156201	4.73857738978842	2.15223832650564e-06	1.23679996982071e-05
Btg2	1347.81980917787	1.2223271883612	0.247264062377365	4.94340817913011	7.67685156358407e-07	4.85005908271614e-06
Btg3	28.1292079004807	-0.0846974295229184	0.322325746936498	-0.262769668038975	0.79272811557638	0.854605177161045
Btk	1217.82276767547	-0.254258249994848	0.0865574902352905	-2.93744942585204	0.00330924142567334	0.00907931182517965
Btrc	243.100588794329	-0.0508019169999395	0.125713690150458	-0.404108072391623	0.686133249135097	0.771876905369196
Bub1	514.729368507125	0.639055263169287	0.240117390361469	2.66142848798775	0.00778098673874337	0.019242231893709
Bub1b	742.441059258132	0.600023197414342	0.224719610817599	2.67009717234411	0.00758292984238191	0.018826429683641
Bub3	987.036849241624	0.137439727135671	0.125102638374727	1.09861573601661	0.271935710967829	0.384875272439285
Bud13	142.866922492164	0.266854718019022	0.162775190432852	1.63940657854186	0.101128612490072	0.174295205174959
Bud31	397.802112293272	-0.306957389734328	0.161306704598627	-1.90294253731187	0.0570480436704318	0.107554633566502
Bysl	267.012724572912	0.233144290892026	0.180718437997737	1.29009686822849	0.197017027116594	0.29754701623213
Bzrap1	368.931015260726	-0.901975947723301	0.216101394198961	-4.17385529171027	2.99488022367996e-05	0.000135334174560188
Bzw1	3567.79110138015	-0.275308703058653	0.0870964702244225	-3.16096280766903	0.00157248575572376	0.00472135216748167
Bzw2	465.010789101401	-0.571117711990267	0.136650827521647	-4.17939446359955	2.92286320498683e-05	0.000132555796161295
C030005K06Rik	72.1546027675116	0.768578186612198	0.248577797033765	3.09190199520434	0.00198878497655524	0.00581039442495086
C030013C21Rik	46.5447950541929	-1.96178554950527	0.39118565096074	-5.01497318392733	5.30408628538069e-07	3.46223682061805e-06
C030013D06Rik	38.113323950616	-0.0421424534922548	0.404364711159343	-0.104218920022544	0.916995619725738	0.944385423424583
C030015A19Rik	57.8505698009981	0.167370850603067	0.303013524717746	0.552354389986293	0.580705573004239	0.686729903801762
C030017G13Rik	63.7131044309373	-0.174960014490033	0.227466237373953	-0.769169158948194	0.44179289650718	0.559880040507613
C030034I22Rik	49.0138789178944	-0.647259255971219	0.273878065138876	-2.36331177395682	0.0181124248661268	0.0402161021418854
C130023A14Rik	90.6921643101477	0.141156380416462	0.225037008841272	0.627258516913657	0.530489790865823	0.641658877355905
C130050O18Rik	196.902931185058	-0.51814614378437	0.165000000745562	-3.14027964510967	0.00168786632223194	0.00502407702584887
C130083A15Rik	141.723534174897	0.580851283014624	0.198528631018331	2.92578093162286	0.00343592793947983	0.00939208364864329
C130089K02Rik	92.4865268422381	-0.527100433327092	0.227635001332004	-2.31555090492573	0.0205828020879912	0.0449634723619804
C1d	408.699101731519	-0.415253883725918	0.142388798207706	-2.91633814564667	0.00354166427119495	0.00964132486545282
C1galt1	999.775502002598	-0.116214834969652	0.142266373878207	-0.816881964455936	0.413995885573322	0.532676530334103
C1galt1c1	188.453716175464	-0.287282676907282	0.186005268160695	-1.54448677582127	0.122470452459199	0.203443854830917
C1qa	2594.42715651707	0.809772376819706	0.223983627506303	3.61531950274767	0.000299977422996299	0.00107007252505908
C1qb	6481.3861628875	1.19372269481954	0.220612046580205	5.41095879995636	6.26881948777138e-08	5.0059069323352e-07
C1qbp	1141.61306213358	-0.582881118260408	0.122187192381093	-4.77039456346983	1.83865407964929e-06	1.07226420724682e-05
C1qc	2987.74572018151	1.1402493185611	0.175557533112766	6.49501789153462	8.30235436333936e-11	1.16743161634219e-09
C1qtnf6	37.2832835530371	0.457391432842269	0.301077512269403	1.51918165323817	0.128716778083058	0.212112171294394
C230096K16Rik	54.6731252489502	-0.114364192187614	0.363107311661017	-0.314959761246504	0.752792205953189	0.824906648008652
C2cd2	217.752771441353	-0.446853994559132	0.154275784506119	-2.8964623060556	0.00377395977178862	0.0101790149438405
C2cd2l	442.785812860429	0.375256195025018	0.147417176950509	2.54553914806685	0.0109109128737254	0.0257963251016033
C2cd3	412.653540460689	0.518779075234721	0.116107415605672	4.46809596552057	7.89189024074041e-06	4.04066064604223e-05
C2cd5	462.55352972377	0.382389060116325	0.165072119111521	2.31649694796725	0.0205311508862344	0.0448740072773985
C3	8535.546445967	1.686771193287	0.192610016533314	8.75744275218029	1.99729856907406e-18	1.61128221101263e-16
C330006A16Rik	410.326480194751	-0.627059873514213	0.128849235298498	-4.86661695788523	1.13524751855448e-06	6.93548059272241e-06
C330007P06Rik	667.325339106314	0.167068973387242	0.0959683260050944	1.74087618636145	0.0817052837565875	0.145790585010159
C330018D20Rik	94.4603966505472	-0.951127556499871	0.201939327732223	-4.70996693502463	2.47756982207947e-06	1.40578071284356e-05
C330027C09Rik	663.694066311899	-0.109910812591077	0.222907620322926	-0.493077860827948	0.621957573328147	0.720881935930625
C3ar1	4461.58733892993	1.18457573510446	0.143558129900648	8.25154058446058	1.56365515597348e-16	8.4457511321572e-15
C430019N01Rik	259.551942957888	-0.913515446655143	0.200958303628006	-4.54579596942732	5.47280324761929e-06	2.91104094975861e-05
C430049B03Rik	30.6565692395395	0.619784661780754	0.381442339526757	1.62484495703781	0.104195599009639	0.178578457515499
C530043K16Rik	113.863960692648	-0.14310061490154	0.198419753071927	-0.721201456437988	0.470785575841882	0.587839713460669
C5ar1	3576.53983678681	1.49877415780527	0.181844324316134	8.24207279188802	1.69252538324224e-16	9.06401359493769e-15
C5ar2	54.2431770035902	0.955020463806223	0.293239660109013	3.25679160673966	0.00112679124764607	0.00351006629990737
C730036E19Rik	31.3022196266176	-1.72007064257875	0.355864630453927	-4.83349705303584	1.34155265918937e-06	8.04739762435568e-06
C730045M19Rik	69.1631938145629	0.00984637018294563	0.217483389948267	0.0452741250046166	0.963888811539236	0.976592894305003
C77080	4491.031775339	-1.42913661448103	0.213860589922269	-6.68256182684461	2.34800846037344e-11	3.76909266247446e-10
C78197	55.6901664270814	-0.215824052603629	0.222789988205993	-0.968733174868152	0.332678335797225	0.449995362855554
C87436	145.954829545717	-0.140512899862395	0.158031107157209	-0.88914709508814	0.373924031271902	0.493480907461922
C920009B18Rik	505.69784103761	1.08252499686301	0.154721865778241	6.99658701385209	2.62272911908927e-12	5.23921364503786e-11
Caap1	128.360117976111	0.121621933646926	0.189336666187346	0.642358060358914	0.520640724139798	0.632702154625276
Cab39	3385.16470798192	-0.214042980960384	0.087208142409174	-2.45439215934805	0.0141122986042416	0.0323385429596469
Cab39l	580.653562740481	-0.2504692181498	0.125536271954912	-1.99519401245052	0.0460217238346436	0.0897541290034076
Cabin1	1738.2846151651	0.0146398268791553	0.102585601720056	0.142708397998246	0.886520483966049	0.924346337258718
Cables1	66.6741203563409	-0.758843146302169	0.290651971905953	-2.61083088934869	0.00903225461302037	0.0219103554943835
Cables2	246.6796011012	-0.224735065119522	0.142499964744292	-1.57708856646244	0.114775147653851	0.193056032240539
Cacfd1	460.885440553114	0.127267345135319	0.116638118253109	1.09112995855389	0.275215702095614	0.388730596057609
Cacna1a	177.824282618514	0.652095297171283	0.19632057673414	3.32158405409718	0.000895080179611538	0.00284962915770585
Cacna1b	169.289598764807	-0.421550610192367	0.176098438365999	-2.39383502831652	0.0166732462337413	0.0373102425056249
Cacna1d	83.1620048323085	1.23230879316622	0.24141104564864	5.10460815848409	3.31480643467787e-07	2.25862690744023e-06
Cacnb1	63.9396533598364	-0.412898051226919	0.237189187213198	-1.7407962651172	0.0817192968896877	0.145794917969481
Cacnb2	95.4670993488997	-1.54323380514539	0.26306919602181	-5.86626571442995	4.45719314470713e-09	4.5493735382108e-08
Cactin	397.051102944897	0.307684438769512	0.152653076125236	2.01557968289541	0.0438439460619962	0.0862150095609721
Cacul1	2434.57019376182	0.274046862822523	0.104266257142475	2.6283370126929	0.00858034622966839	0.0209839986980911
Cacybp	796.538620524461	-0.465731631415997	0.111618793890048	-4.17251983456095	3.01249365546869e-05	0.000135934860717366
Cad	725.692123938568	0.31551579301291	0.213693090198505	1.47649038497135	0.139812294541736	0.226568015243853
Cadm1	667.627999332582	-1.84197722405471	0.190159795694323	-9.68647035683425	3.44219328572847e-22	5.77600033345238e-20
Calcoco1	481.848852324843	0.322214776520437	0.122541514554225	2.6294336061748	0.00855272309104343	0.0209205092518526
Calcr	2101.5519965379	-2.40454620280017	0.400009835306396	-6.01121770158066	1.84134933425979e-09	2.04350805746556e-08
Calcrl	1183.75545415645	0.820380143649872	0.117143151458298	7.0032275334672	2.5013210615864e-12	5.02163405618703e-11
Calhm2	121.525904521428	1.14909788697043	0.197263682860375	5.82518723319066	5.7048604986176e-09	5.68903877774187e-08
Calm1	11057.1913699542	-0.22678487563639	0.110018892627356	-2.06132665236442	0.0392718871628216	0.0782315959687123
Calm2	2527.35983866349	0.129369866405237	0.118816778101326	1.08881816585627	0.27623407915739	0.389797774239919
Calm3	2327.70332937376	0.18368819886953	0.0949773007317631	1.9340221026949	0.0531104103580199	0.101287242666416
Calr	18307.4744489482	-0.615601249231515	0.146273263400899	-4.20856987065573	2.56992064809641e-05	0.000117866076371331
Calu	3123.4483918121	-0.779556196875192	0.15478348247974	-5.03643014348918	4.74294089778953e-07	3.14322860445926e-06
Camk1	923.076555215322	0.415676723859077	0.122357899469055	3.39722016856135	0.000680741722426817	0.00222928300201444
Camk1d	1326.59674717807	1.33117468486635	0.201764942441126	6.59765105255973	4.17723011772762e-11	6.31856262399064e-10
Camk2a	218.283397871584	-1.27535409177531	0.211846541718034	-6.02017895327644	1.74224343634492e-09	1.9472587607816e-08
Camk2d	2040.46488897861	0.0449250689744282	0.100393314502885	0.447490644141819	0.654520841536156	0.74652390708107
Camk2g	414.985784294291	0.130347601252501	0.113521644006964	1.14821805473946	0.250878557717963	0.360958802890199
Camkk2	1051.49037046341	1.02552300686682	0.152774248253277	6.71266930514795	1.91095873214996e-11	3.13961039740304e-10
Camkmt	37.2952925727173	0.363588015869465	0.312827927782066	1.16226200917318	0.245129053403482	0.354428899021464
Caml	250.571257319136	-0.247654446043083	0.158896649837746	-1.5585882162775	0.119093873825201	0.198767791130647
Camsap1	379.408677142119	-0.169036551936442	0.128890253858398	-1.31147660025675	0.189696794285727	0.28863911934299
Camsap2	1041.61390735361	-0.0094034542939231	0.1175191242518	-0.0800163748138134	0.936224232511281	0.957779975404038
Camta1	123.874862444574	0.517594380956095	0.182414344097456	2.83746535129697	0.00454732820356438	0.0120025430876379
Camta2	1296.8517971175	0.244769332865244	0.108802185532598	2.2496729423869	0.0244697143400748	0.0523192923835952
Cand1	1893.15824623409	-0.206739751009678	0.0949283442385018	-2.17785059528961	0.0294171616783168	0.0611723363717146
Cant1	1411.02467117402	-0.44048574191185	0.100994810570353	-4.36146906384865	1.29192065280358e-05	6.30675772518736e-05
Canx	10363.5989890447	-0.148647065910267	0.0829498743820832	-1.79201074163862	0.0731312453732327	0.132961098385168
Cap1	10366.5794779601	0.0435598070776495	0.0986984150276352	0.441342518676241	0.658965049056981	0.750165096551977
Capg	10845.4823493058	-0.176780947207624	0.122034518600146	-1.44861428746123	0.147445328938986	0.236532755219521
Capn1	877.089127096942	0.601905376967753	0.133296065061185	4.51555247854817	6.31519045872784e-06	3.31982756570969e-05
Capn10	84.1732322042445	0.245977382752753	0.214423209727505	1.14715838395175	0.251316167716322	0.361453031638843
Capn15	262.551845730205	0.15570424552031	0.137659264446204	1.13108439266111	0.258019572676764	0.368955382585737
Capn2	2230.8558551717	0.591651779607615	0.112373558943361	5.26504442122209	1.40155464524959e-07	1.04555810376207e-06
Capn5	415.89265204467	0.0227994230162602	0.160686380623008	0.141887712747421	0.88716869992745	0.924792353896045
Capn6	38.8128499010773	-2.27015871966355	0.451877861811385	-5.02383256963166	5.06503975275957e-07	3.33212364288966e-06
Capn7	947.018358166074	-0.290294386360873	0.0912733957625845	-3.18049289100596	0.00147024746537187	0.00444999142657647
Capns1	3578.79942091824	0.161396135682875	0.0957974004215061	1.68476529605956	0.0920338629737161	0.161137809789111
Capns2	38.1551229557709	1.64074414873757	0.388665730566565	4.2214788176612	2.42704765856129e-05	0.000111598081048571
Caprin1	6784.86714399358	0.0450631168080653	0.0760904712428069	0.59223074942285	0.553696081192248	0.663391582426165
Caprin2	117.512698505803	-0.957141947647554	0.213724932233785	-4.47838227222165	7.52108296002394e-06	3.87128135181601e-05
Capza1	1293.93178670881	-0.165813508957415	0.0971096814251051	-1.70748690062686	0.0877315905090972	0.154701144256269
Capza2	4319.14962256677	0.314335048759008	0.0990059245231443	3.17491150426585	0.00149882204138819	0.00452776653645471
Capzb	4663.2272562318	-0.152290692244541	0.124572960400829	-1.22250199204166	0.221517851035755	0.327475878689648
Car13	568.609287386772	0.482444919200474	0.145022665755822	3.32668632648622	0.000878852418039354	0.00280150903774703
Car2	3054.12605426921	-2.3842333494404	0.262853962040056	-9.07056272211361	1.18403918091577e-19	1.26280788913771e-17
Car5b	93.4852826294258	1.16315392390233	0.247766080318657	4.69456481858361	2.6717488600144e-06	1.50375489281222e-05
Car9	61.7056038586754	-0.553011854130386	0.275389500532281	-2.00810798182759	0.0446318182709724	0.0874772516648789
Card14	376.436052113892	-2.01262742810778	0.311635635184639	-6.45827113743052	1.05905871373288e-10	1.461431350036e-09
Card19	943.334050522677	0.586584105182277	0.133187931524219	4.40418361085227	1.06182983520645e-05	5.27353136388049e-05
Card6	49.1618980668845	-0.358749277645316	0.321223636623935	-1.11682092082568	0.264070901836773	0.376155325366812
Card9	357.757046778823	0.569381084807604	0.122114103358623	4.66269717540694	3.12091826296685e-06	1.73483906092923e-05
Carf	154.936042987403	-0.704493300744381	0.187269250714742	-3.76192726812103	0.0001686090840563	0.000637603762875162
Carhsp1	511.974356829088	0.511167004409135	0.108083033068682	4.72939174536589	2.2519349101457e-06	1.28938129409389e-05
Carkd	336.157543974956	0.0467675860472711	0.145688455584016	0.321010926087421	0.748202110931553	0.82165127103609
Carm1	399.872716088001	0.114321414289707	0.126819042274142	0.901453064458416	0.367347478336229	0.486433924122626
Carnmt1	84.0734742218275	-0.367829904310544	0.198252745034743	-1.85535844281038	0.063545057631894	0.117892154553467
Cars	724.450428035771	-0.0133153707821745	0.117898018028015	-0.112939733889424	0.910078334752997	0.939603095846768
Cars2	251.500943127144	0.076537707342206	0.129711021575205	0.590063253012236	0.55514824380902	0.664602808318939
Casc3	773.949479022737	-0.0799333026814646	0.104465591479452	-0.765163931486348	0.444173934422896	0.562111969573437
Casc5	547.271043238112	0.494501915253617	0.416647144119789	1.1868602058903	0.235282766154149	0.343520673754817
Casd1	477.993135698471	0.150220549959551	0.100378819579623	1.49653632697277	0.134513948723644	0.219908813287485
Cask	634.136166719569	-0.176364766148689	0.088027775407971	-2.00351270188658	0.0451222856148362	0.0883285059049173
Caskin2	139.530369065601	0.257210363130309	0.174250129983815	1.47609854382433	0.13991743976808	0.226681382528486
Casp1	695.806968188397	0.886837996539077	0.14653900008109	6.05189059600739	1.43155684034456e-09	1.61870106340847e-08
Casp2	380.844858240136	0.329518225673164	0.160061497022305	2.0586976368667	0.0395232127561608	0.0786595229051225
Casp3	576.911610457451	0.0955917553489289	0.116380287683527	0.82137411112844	0.411433205312089	0.530249553389928
Casp4	873.698147301916	0.837785418641604	0.147163744153997	5.69287920375904	1.24914765481835e-08	1.15507150888236e-07
Casp6	297.445796584295	-0.716234673907169	0.153124010294761	-4.67748116398224	2.90420241816604e-06	1.62586243027668e-05
Casp7	292.844701842022	0.0835600294826103	0.174834525201435	0.477937806542138	0.632694471677768	0.729430187437222
Casp8	1250.00334969757	-0.48331014025529	0.107416623131558	-4.49939800903403	6.81461647313644e-06	3.5424183525164e-05
Casp8ap2	344.068599573836	0.346325062467283	0.182978024423733	1.89271396692576	0.0583959179919522	0.109753976691864
Casp9	510.602427069139	-0.120216206498106	0.116092738726674	-1.03551873973048	0.300426719405113	0.415983085456414
Cass4	98.3553915654813	1.20829840201892	0.230093631313441	5.25133353375148	1.51001964992179e-07	1.12115618255255e-06
Cast	2202.9211117082	-0.227753998641932	0.120162783836915	-1.89537884667385	0.0580422290858917	0.109170744738596
Casz1	76.047329550901	0.0775386040515662	0.204330279400044	0.379476817039724	0.704333816512265	0.787284934790554
Cat	5332.0381187067	0.747376563804499	0.162006516460046	4.61325001077237	3.9642098761143e-06	2.16534641019524e-05
Catsperg1	32.7801403830468	-0.21741918610024	0.370862038558609	-0.586253548476573	0.557705141632716	0.666861682417837
Cav1	428.402180505003	1.31404016814668	0.269550072070979	4.87493903470619	1.08842063479053e-06	6.6851018491161e-06
Cav2	1482.90358495094	-0.235755878834837	0.11776527797947	-2.00191332181915	0.0452940546300793	0.0885958466769581
Cbarp	52.5776968194867	0.348194776060736	0.241618233480386	1.44109478430154	0.149557906851751	0.239190018773578
Cbfa2t2	592.863719172763	-0.268436672377463	0.110319553997002	-2.43326466298765	0.0149633589917081	0.0340386128275992
Cbfa2t2-ps1	53.3448762926033	-0.109191074630047	0.228165591177574	-0.478560654419916	0.632251214657184	0.729052733778694
Cbfb	1573.63447521517	0.338475355585404	0.112440383415431	3.0102650427191	0.00261019809343387	0.00739516951955544
Cbl	4648.04839605226	0.561381824491944	0.0866625109605851	6.47779320342178	9.30737927841865e-11	1.30003738311763e-09
Cblb	1471.72690982561	-0.992820608892673	0.211826649297971	-4.68694855998075	2.77308631255183e-06	1.55697941400298e-05
Cbll1	226.458439272297	-0.0856972713667114	0.130508015200416	-0.656643741268378	0.511410016419496	0.624802937252631
Cbr1	270.679966399389	0.0475968697769864	0.146196138118403	0.325568584708017	0.744750784014982	0.81893303773076
Cbr2	52.6022064442264	0.546030943004208	0.389055279246942	1.40347907387636	0.160474027831035	0.252689993873544
Cbr3	218.982823369602	0.990316922018225	0.151772853027596	6.52499378026558	6.80043560593715e-11	9.76980389277614e-10
Cbr4	191.977673615383	-0.900806876296985	0.193254737071877	-4.6612408572523	3.14308637633649e-06	1.74599630780734e-05
Cbwd1	100.154956113119	-0.459805275173257	0.212675235096958	-2.16200666224082	0.0306176626714875	0.0631988329868247
Cbx1	491.030279612897	-0.362076284601452	0.102243442509641	-3.5413154693741	0.000398137240828888	0.00138146048410023
Cbx2	33.0344360614686	0.725005874152021	0.331265371326106	2.18859541898301	0.0286262590846775	0.0597448541593144
Cbx3	116.969410299777	-0.0786986727307979	0.185587451635629	-0.42405169119575	0.67152811566168	0.760271800611933
Cbx3-ps6	29.9499880924276	-0.117745116363479	0.32648441939162	-0.360645437791146	0.718364517599008	0.798711675411566
Cbx4	294.132249390254	0.457678472651047	0.223156528241305	2.05093024281211	0.0402737404759695	0.0800071071649685
Cbx5	1276.79649912912	0.36966407600909	0.213508633303429	1.73137765105611	0.0833844300210951	0.148366047195742
Cbx6	60.7447022540717	1.15140334331475	0.318581134906042	3.61416046701677	0.000301322404707775	0.00107426132103324
Cbx7	270.119259895437	-0.834416392893438	0.163506781466671	-5.10325250982649	3.33865046398399e-07	2.27364264552156e-06
Cbx8	91.8881201544187	-0.88394909178935	0.219572052241242	-4.02578143605527	5.67864164924583e-05	0.000241519787616623
Cby1	53.4929083943391	0.0502628131303986	0.245611892079562	0.204643238993154	0.837850870420354	0.887646536260641
Cc2d1a	446.762365927377	0.231841820016923	0.108927434869418	2.12840612922589	0.0333034254063723	0.0680395468732459
Cc2d1b	694.362005642107	0.404007663520635	0.10828091950037	3.73110669344893	0.000190640458609746	0.000711720608603872
Cc2d2a	101.096379126435	-0.380690653444774	0.207047926539675	-1.83865957900248	0.0659652722062971	0.121797674694285
Ccar1	1080.4134592518	-0.192466249885313	0.091930394334887	-2.09360844449542	0.0362948747035402	0.0731456693323285
Ccar2	689.71713325937	0.235021268805512	0.12179713966044	1.92961238220152	0.053654883447104	0.102139874176646
Ccbe1	56.2999748210112	-0.781710166064965	0.407183979900572	-1.91979597590221	0.0548836753766598	0.10402984989962
Ccdc107	106.303942536888	-0.480122437127092	0.166936554498208	-2.8760773131462	0.00402651075111946	0.0107977067553459
Ccdc109b	288.281035340797	1.25338497945411	0.140497712318817	8.92103478959095	4.61951454640783e-19	4.43790767683531e-17
Ccdc115	321.055226262588	-0.01531294952531	0.135196782813823	-0.113264156192217	0.909821133545065	0.939603095846768
Ccdc117	476.746712873677	-0.22468368898516	0.168360028916536	-1.33454294603707	0.182025982001301	0.279853164092803
Ccdc12	295.044365004533	0.3699737476677	0.130300067977441	2.83939796356632	0.00451987479091078	0.0119451121889148
Ccdc122	118.101244857405	-0.791329317296498	0.179686291190077	-4.40394930551162	1.06297792938397e-05	5.2771507855216e-05
Ccdc124	229.465828491763	0.0241451568636488	0.160762243651105	0.150191713646706	0.880613363293075	0.920322137273156
Ccdc125	47.7902305772998	1.13352244291418	0.276627329869501	4.09765167978493	4.17362680341456e-05	0.000182505536209077
Ccdc126	44.7127728732484	0.252265882788257	0.285196624196324	0.884533200556404	0.376408448298908	0.495564423249477
Ccdc127	428.964638873243	-0.142135469637285	0.134969375903273	-1.05309421997437	0.292297811676509	0.407299196138179
Ccdc130	120.384627861976	-0.308114783342523	0.190531186059686	-1.61713570211021	0.105848991776885	0.180870273117732
Ccdc134	123.339049218551	-0.00918722627266351	0.192211375984603	-0.0477975157588979	0.961877616432506	0.975284386303827
Ccdc137	96.3341954025926	-0.0825510755162452	0.193600556352295	-0.42639895810024	0.669817160475634	0.758905616867891
Ccdc14	110.637105488013	0.0500881232262701	0.265331105970931	0.188775918462261	0.85026844675465	0.897430184776039
Ccdc146	100.547705607838	-0.432686652589839	0.249330970004491	-1.7353907241529	0.082671621944639	0.147326870882651
Ccdc15	81.8982718009891	0.292659868061048	0.270123943981025	1.08342808766929	0.278618454149897	0.392523591791834
Ccdc154	43.4270258304578	-0.205354490478125	0.255871435026751	-0.802569034158327	0.422223872322069	0.541048025897196
Ccdc157	60.4056468432957	-0.34577883231358	0.231338881685234	-1.49468532827117	0.134996585116917	0.220525963615835
Ccdc163	109.744091250855	-0.483315581051079	0.192142028928439	-2.51540791854074	0.0118894730821785	0.0278586890223825
Ccdc166	44.229973798944	-0.502599815186396	0.252710540833016	-1.98883597625039	0.0467193103992491	0.0908145310017484
Ccdc167	71.2736517329665	0.302913229726678	0.264066856538863	1.14710809867235	0.251336947149107	0.361453031638843
Ccdc17	39.1049250689691	-0.408824162063627	0.349369950641283	-1.17017551541915	0.241930343935582	0.350884650965435
Ccdc171	67.9773691379572	0.192983732145705	0.281370440008816	0.68587066978201	0.492794667182835	0.607842878221697
Ccdc174	246.905233926343	-0.059646286046236	0.142110750141962	-0.419716917873222	0.674692264656233	0.762345317893579
Ccdc18	35.125639300012	0.64115831091948	0.429344232705782	1.49334324786156	0.135347360339501	0.220869622649458
Ccdc181	54.6229281400606	-0.0490488779406711	0.249560915169258	-0.19654070392956	0.84418697674865	0.892345200311294
Ccdc186	796.99449662915	0.184295686148406	0.110785819842512	1.66353136538948	0.0962061177488297	0.167416204627907
Ccdc189	73.0059262687135	-1.60574865323266	0.295978370859751	-5.4252229599356	5.78822422103662e-08	4.6546199247122e-07
Ccdc191	56.3224283680273	0.254971572630832	0.33048715144092	0.771502224879726	0.440409304157096	0.558781237303867
Ccdc25	205.083436753369	-0.0392682671412528	0.150824767206942	-0.260356888781894	0.7945884942386	0.855642697013158
Ccdc28a	62.8087723189364	0.206570012479644	0.272773862197297	0.757294012027558	0.448873737535084	0.566436978529934
Ccdc28b	57.8592512374539	-0.0690179890242545	0.250943144079957	-0.275034367953339	0.783289834295357	0.848193302754007
Ccdc32	254.497194115394	-0.45116269449617	0.144867900148861	-3.11430409381631	0.00184379353053066	0.00542659999572694
Ccdc34	104.485297870176	0.79387856204327	0.273773892741809	2.89975992265983	0.00373448573222471	0.0100876803906521
Ccdc43	262.706354016884	-0.206944148106984	0.149150531627382	-1.38748515240955	0.165293875494272	0.258734256603907
Ccdc47	791.701864384951	-0.311376239738937	0.117395987468909	-2.6523584532342	0.007993163420861	0.0197204394533495
Ccdc50	3166.26180911631	0.598201450015302	0.140319418700826	4.2631408792444	2.01573343095745e-05	9.4375019451635e-05
Ccdc50-ps	96.260615690804	0.559828699551871	0.234506602369556	2.3872619955904	0.0169743896592227	0.0379032458944851
Ccdc51	60.5584920036567	-0.385716599250265	0.250273657626555	-1.54117937504158	0.123273135746347	0.204696188595828
Ccdc53	200.4467310952	0.0112251721040925	0.15940728665032	0.0704181868970413	0.943860816130015	0.962600354213634
Ccdc57	78.6373189699673	0.433087052111973	0.237514658613965	1.82341188808845	0.0682410311199904	0.125374215568625
Ccdc58	88.8266283312337	-0.577692507378143	0.220276242003009	-2.62258200033325	0.0087266264995699	0.0212764431708311
Ccdc59	330.135748427863	-0.282942687190174	0.145025313025461	-1.9509882880963	0.0510584390158703	0.0979530984408312
Ccdc6	1315.13901267592	-0.105370356952299	0.0980217779330011	-1.07496884033588	0.282388679136997	0.396802665426872
Ccdc61	103.499101199781	-0.0798653820714853	0.214356938138453	-0.372581278521064	0.709460108738226	0.79139828651574
Ccdc64	51.4485104007703	-0.511768189724089	0.311584146120161	-1.64247185261707	0.100492254793815	0.173388405069943
Ccdc66	75.0053148060303	0.0873644678634502	0.23840024534662	0.366461316918644	0.714020872620424	0.79493565834466
Ccdc71	347.920543872688	0.0514932666607286	0.116003971393201	0.443892274051462	0.657120470599533	0.748674734971494
Ccdc71l	583.20390983081	0.648127265334666	0.104999809296795	6.17265183313479	6.7153985630854e-10	8.03358278673287e-09
Ccdc77	74.975783310409	-0.126701507092166	0.241842869045814	-0.523900115773784	0.600348014280836	0.702460816922575
Ccdc82	227.617385754323	0.659575999558491	0.182543218214354	3.61325940240614	0.000302371928231379	0.00107769773910844
Ccdc84	79.3393124697301	0.174336380044977	0.227187943141423	0.767366338346808	0.442863736482605	0.560990450290245
Ccdc85b	72.4704065294148	1.2349418108598	0.236291682810752	5.22634481319799	1.72893800361809e-07	1.26137303046572e-06
Ccdc85c	99.0203575251851	-1.96601527088483	0.313930450116977	-6.26258226990168	3.78653986785888e-10	4.7653604237004e-09
Ccdc86	411.645030913085	0.451104872952489	0.137492098546064	3.28095125263765	0.00103457623283056	0.00324287469244649
Ccdc88a	2998.22567268512	-0.406559940733425	0.103410429584358	-3.93151776244938	8.44112582228893e-05	0.000343347021569186
Ccdc88b	1049.19839836572	0.660134439419614	0.162857712380266	4.05344290897459	5.04693208058996e-05	0.000216702969069344
Ccdc88c	28.3353106851142	-1.27660544667422	0.45103678274984	-2.8303799058053	0.00464927618028786	0.0122357048784865
Ccdc9	651.765249082635	0.329517051493725	0.137195857130766	2.40180030494398	0.0163146118736502	0.0366510871884841
Ccdc90b	115.52260008098	-0.500058923081813	0.194152161942381	-2.575603166501	0.0100065416721929	0.0239233143891619
Ccdc91	255.509702776179	-0.352599456592979	0.137602893727023	-2.56244216268058	0.0103938897894249	0.0247365928517232
Ccdc93	1181.18933473125	-0.0907974876706529	0.117828437725079	-0.770590609734674	0.440949628857249	0.559297629426373
Ccdc94	113.072068057168	-0.0587641191403516	0.163190662523684	-0.360094862240192	0.718776194780111	0.799028214054208
Ccdc97	731.431464326158	0.0715251437092441	0.0969960382221833	0.737402733350877	0.46087747374791	0.578600254968359
Ccer2	30.8867301972583	1.24455811987923	0.357320411392487	3.48303114011638	0.000495770693190892	0.00167587273000467
Cchcr1	38.60076109501	0.809106538153192	0.356946569306113	2.26674412286986	0.0234058613367584	0.0503182037791432
Ccl12	37.2070400544724	1.02233128893121	0.424657069751641	2.40742792655993	0.0160653329066975	0.0361556177808991
Ccl2	1563.20681927622	1.35694231738041	0.182343139653842	7.44169657249739	9.94003310682386e-14	2.70769083656663e-12
Ccl25	191.920553915258	-0.72123927254292	0.170151883832033	-4.23879686959502	2.24720874062002e-05	0.000104165809619866
Ccl3	649.076411754553	1.44539338445144	0.245602200510071	5.88509948791022	3.97814620000672e-09	4.08693632057833e-08
Ccl4	653.852012958915	1.41171683655838	0.241104348321839	5.8552110170736	4.7640473171287e-09	4.82733780081036e-08
Ccl5	117.647527279452	1.06208817619682	0.351843675763682	3.01863654047933	0.00253914953495775	0.00721825093685189
Ccl6	1786.93552135582	1.7222634040269	0.227430777659653	7.57269276282493	3.65566185078759e-14	1.10063407636751e-12
Ccl7	610.974057336629	1.2034275950382	0.26240745681141	4.58610288618091	4.51596122115468e-06	2.43710857496705e-05
Ccl9	16144.5996018856	-0.53263066010521	0.150365412958514	-3.54224186018206	0.000396741525325458	0.00137737712999197
Ccm2	447.245254803807	0.383729890743951	0.156370644508526	2.4539765244942	0.0141286204658323	0.03237005071227
Ccna2	607.538047596092	0.964579432754482	0.222194684731524	4.34114539652456	1.41741886543643e-05	6.8661341114386e-05
Ccnb1	249.72678389796	0.782418803281188	0.233999895667417	3.34367159032087	0.000826775469431025	0.00265172171258834
Ccnb2	283.884534598519	0.844537570512233	0.21926504631972	3.85167442183547	0.000117312927176026	0.00045970760741245
Ccnc	351.344378965015	0.333395612263064	0.129128880801268	2.58188261366693	0.00982630015601124	0.0235415928923285
Ccnd1	2690.67452992913	1.53334911179119	0.184866191610532	8.29437280247318	1.09159611369943e-16	6.16042022013781e-15
Ccnd2	249.717229706157	2.71569213722788	0.241115166798053	11.2630498250756	1.99724736408646e-29	7.3927523755965e-27
Ccnd3	431.476141386186	1.34427910950977	0.184874550153606	7.27130428927535	3.56032920956184e-13	8.61668136583379e-12
Ccndbp1	364.927049148589	0.145394892771514	0.110287659111122	1.31832422542416	0.187395134692539	0.286036115234154
Ccne1	101.133960651124	0.616943899062504	0.249543292992904	2.47229204865886	0.0134249793085045	0.0310195819606723
Ccne2	221.981497420561	-0.0473690569719016	0.169929764937119	-0.27875667920467	0.780431562061372	0.846409101046395
Ccnf	945.849087062427	-0.29666958239445	0.229389187460182	-1.29330238133367	0.195906497375167	0.296248987896817
Ccng1	2890.96907590472	-0.00688950968965093	0.107541206256741	-0.0640639056363482	0.948919341912162	0.966108651073807
Ccng2	478.344294211512	0.413220895298109	0.136941977435725	3.01748888862116	0.00254878384884947	0.00723746496790852
Ccnh	254.490637125051	-0.157408764532955	0.143790177248041	-1.09471152720969	0.273643036906742	0.386813166289043
Ccni	2376.49243255948	-0.174721905409238	0.0967067524900422	-1.80671877516753	0.0708061387602598	0.129369230008401
Ccnj	58.0301427639002	-0.152971942246199	0.216332303536575	-0.707115579806768	0.479494654801884	0.595817558321654
Ccnk	695.486651943974	0.139280393067398	0.107107888177565	1.30037474771697	0.193472560478069	0.293429053560727
Ccnl1	2772.82453974487	0.564520519503798	0.15023777351553	3.75751388145701	0.000171609849885115	0.00064778343155494
Ccnl2	1289.16823569909	-0.0410171667810233	0.104400754000436	-0.39288190179979	0.694406709251395	0.778956095545843
Ccno	36.8291656042575	0.912489145269063	0.354752292143064	2.57218674968019	0.0101058362854968	0.0241286187920654
Ccnt1	1021.89312672715	-0.0538604201351625	0.0883914370543717	-0.609339795007877	0.542299234780426	0.653040585669586
Ccnt2	1273.27655729134	-0.0381667604798055	0.0967614364011779	-0.394441855137042	0.693254847401415	0.777871991311235
Ccny	2294.46934859273	-0.398228132254651	0.12028660705758	-3.310660612981	0.000930760204383396	0.00295202045669482
Ccnyl1	110.367440377485	-0.0412617388412968	0.190584158690188	-0.216501408747049	0.828596927178488	0.88073414937004
Ccp110	117.74332285811	0.711569508051469	0.262919668057807	2.70641414279825	0.00680141670054724	0.0171672340907315
Ccr1	3761.50132512498	-1.92189756407976	0.23830592725464	-8.06483324280112	7.33358997526576e-16	3.36836605250801e-14
Ccr2	59.2865572874556	2.1728608299329	0.340687563768986	6.37786952330987	1.79568392596774e-10	2.37880865350569e-09
Ccr3	409.18234322904	-1.7553667205514	0.254140199717215	-6.90708011760681	4.94730564569204e-12	9.30670277294981e-11
Ccr5	1195.67111231551	1.70710954824242	0.232007117631986	7.35800507185415	1.866789552463e-13	4.79460133015243e-12
Ccrl2	1944.0997821085	1.88290386769659	0.145263052653203	12.9620287699157	2.00863871020116e-38	2.80874646309795e-35
Ccs	139.902108290565	0.209286111465585	0.170699597893136	1.22604923531574	0.22018014761423	0.325752898072823
Ccsap	161.08068860225	0.707652579767082	0.225761577101255	3.13451291780132	0.00172139674587047	0.00510456598651741
Ccser1	305.593650851566	-0.877767938553381	0.264109180108207	-3.32350408340124	0.000888941213314315	0.00283080090322891
Ccser2	1089.79761463765	-0.571917218015294	0.120468075266169	-4.74745874997728	2.05988383254484e-06	1.18806773751498e-05
Cct2	2791.16966619555	-0.275869756446585	0.0969393508860933	-2.84579743855248	0.00443003651526159	0.0117298568366436
Cct3	2565.67286522513	-0.578300083828328	0.146822472720388	-3.93877090552517	8.19000848680244e-05	0.000334429775491268
Cct4	2144.39557990045	-0.13952532809712	0.0886420320744314	-1.57403124490606	0.115480226207178	0.193930964347122
Cct5	2072.69321745507	0.0564539668055183	0.0920343102487363	0.613401313629049	0.539611017674731	0.650604010101215
Cct6a	2313.55576978898	-0.467875089642184	0.120205046611727	-3.89230820860178	9.92949893252102e-05	0.000397337818969084
Cct7	1807.74958402047	0.0444107344681657	0.104160325575389	0.426369005884318	0.669838982293884	0.758905616867891
Cct8	2614.68874359361	-0.0973404065545551	0.0780491414101155	-1.24716819167904	0.212335833369649	0.316129949480306
Ccz1	874.699009634731	-0.477020570011123	0.0898030697994344	-5.31185148877981	1.08517023942053e-07	8.2668689243991e-07
Cd101	41.2515156168042	-0.132002726217264	0.339125261081419	-0.389244746310928	0.697095105527076	0.781165715094838
Cd109	2082.51071629707	-2.13959459665172	0.464414312479691	-4.60708152000652	4.08359938395721e-06	2.22669403150353e-05
Cd14	1612.28325081262	1.55987800104296	0.149327413381158	10.446025721087	1.52794618377526e-25	4.00608390058577e-23
Cd151	606.504858075945	-0.303673066166908	0.137045024874415	-2.21586348315225	0.0267008531121161	0.0562676216369694
Cd163	61.9188746820439	0.683158002633637	0.255599634289318	2.67276596280399	0.0075228714199399	0.0186994542405577
Cd164	1709.60112792859	0.323701272443832	0.123036876526822	2.63092888556274	0.00851518519981697	0.0208448951059515
Cd180	2679.88343029707	0.658998910372099	0.172284899859081	3.82505321656814	0.000130743841401264	0.000506436209305912
Cd1d1	78.2465263811763	0.213411938308882	0.22710755033432	0.93969547905705	0.347373784794156	0.465371415971307
Cd200	1172.89279146113	-1.78974182253132	0.264306572231486	-6.77146166824722	1.27487741086262e-11	2.19484708833188e-10
Cd200r1	711.32861235372	1.04583532116531	0.174351856316009	5.99841804534477	1.9924903459717e-09	2.19383123395047e-08
Cd200r4	232.297943707147	1.78178193310782	0.213747091105376	8.33593535188467	7.68879240376659e-17	4.41842248408231e-15
Cd207	46.263362987913	2.35953184438371	0.418253970298275	5.64138540681641	1.68687293311634e-08	1.5070097870684e-07
Cd22	43.3918497336425	0.627973174335721	0.271919812914856	2.30940573106511	0.0209210773054793	0.0456311538803219
Cd244	62.6066022220727	0.0954874791084521	0.263139920617835	0.362877205724824	0.716696615002639	0.797209377745113
Cd24a	288.609288019003	1.04079268280219	0.181278391414974	5.74140510999823	9.38941676908738e-09	8.95874223191544e-08
Cd274	2382.74038304237	1.25361160216576	0.169504546473327	7.39574028100201	1.40622624062753e-13	3.66404911765994e-12
Cd276	219.321546516912	-1.60840333093471	0.313245860519037	-5.13463554879752	2.82691290225934e-07	1.9623110245413e-06
Cd28	711.850216135731	0.926181853544705	0.212584237816765	4.35677575654982	1.319923720248e-05	6.43098723163806e-05
Cd2ap	862.789302874797	0.51515251474064	0.137865740343388	3.73662458459605	0.00018650706077853	0.000698489110891229
Cd2bp2	597.701134876084	0.135662591291459	0.131371754151645	1.03266179375866	0.301762199091971	0.417281318049935
Cd300a	1571.58028053653	1.4708203321932	0.222340935519532	6.61515761259352	3.71156081090475e-11	5.6618173097256e-10
Cd300c2	1053.0620300163	1.39658185166149	0.15873781166844	8.79804148099618	1.392245787598e-18	1.16035849251131e-16
Cd300lb	1282.48954387182	1.45569935589221	0.230348273005791	6.31955836654182	2.62311862080227e-10	3.37890970755338e-09
Cd300ld	1625.41357079296	1.64998644755016	0.156257250514236	10.559423272329	4.59476081328496e-26	1.34476894965561e-23
Cd300lf	114.044121520247	1.81675905058836	0.229097310777355	7.9300758460406	2.19012084961276e-15	8.89118415883115e-14
Cd302	358.458808423735	1.21896813954397	0.178412201678156	6.83231375476725	8.35558499307359e-12	1.48734140223241e-10
Cd320	90.1717974821697	-0.516519512455077	0.208058210188437	-2.48257212242319	0.0130437659878235	0.0302535064762721
Cd33	1357.5249252621	1.39748509271038	0.194537058284002	7.18364462297054	6.78771615044543e-13	1.53639222577978e-11
Cd34	68.9264536310865	3.05460372624362	0.453836245795899	6.73062972501617	1.68930359307529e-11	2.82460827301208e-10
Cd36	5915.59240897534	1.24763534194402	0.210801515206927	5.91853118664404	3.2482941792529e-09	3.3925130494521e-08
Cd37	1695.83139142999	0.558767173505369	0.106422482449803	5.25046175058853	1.51718407317594e-07	1.12581141279005e-06
Cd3eap	84.1351311174435	0.113743696818562	0.229765415217169	0.495042723079338	0.620569963274403	0.719803962009987
Cd4	89.9816087833593	0.688585010795864	0.327073388982045	2.10529206591511	0.0352658923323463	0.0713800704850286
Cd40	232.958832946334	0.848674150586244	0.30129520190421	2.8167529559799	0.004851182457446	0.0126901124978088
Cd44	14966.6719019112	-0.155749654976511	0.18596455882771	-0.837523321423884	0.402298473595185	0.521038004548256
Cd46	42.1408969686006	0.272387576652199	0.272481146392262	0.999656601048177	0.317476721383132	0.434004403498448
Cd47	4666.80385113605	0.448979702740546	0.0927213197492713	4.84224883721065	1.28377853620509e-06	7.73224744123765e-06
Cd48	662.064497692302	0.943546906767523	0.16864873493567	5.59474642443912	2.20944450233068e-08	1.92694795993289e-07
Cd5	106.436136080371	-1.45735189161643	0.248827773397441	-5.85686988119559	4.71672383917428e-09	4.79095799160681e-08
Cd52	1379.89510528166	0.941720001844681	0.150802204847088	6.24473629413824	4.24515714358979e-10	5.29487637780748e-09
Cd53	3430.28001899626	0.805127822247343	0.150767457551597	5.34019632168835	9.28459817695452e-08	7.17731376271331e-07
Cd55	473.252989191011	0.3655713701897	0.177135623462679	2.06379362345893	0.0390372879194811	0.0778457088364237
Cd59a	215.500979091336	-1.30662788965013	0.196799650656916	-6.6393811436586	3.15002889834473e-11	4.90026127140524e-10
Cd5l	191.760164067654	0.975210573181863	0.322583821942071	3.02312300508668	0.00250180530404689	0.00712496486794073
Cd63	2707.38527753454	-0.0922587542343454	0.153477684354174	-0.601121619879563	0.547758984446618	0.658032342426564
Cd63-ps	4294.90368547239	-0.378430045024426	0.152393101722591	-2.48324918088026	0.0130189982054596	0.0302016760213289
Cd68	9874.71199882276	-0.489989619649231	0.146580431258932	-3.34280377974651	0.000829365224532774	0.00265925129955285
Cd69	310.799045286137	0.127715802020625	0.193699715925286	0.659349454440541	0.509671391994641	0.623283885749933
Cd72	726.146517715041	0.859455781922971	0.161199509758457	5.33162776494041	9.73363014118189e-08	7.49680142758715e-07
Cd74	4890.81839426709	1.8959777532389	0.242655844296589	7.8134435984221	5.56463211968461e-15	2.0536919421182e-13
Cd80	299.748812942833	1.25798010867749	0.180828236628853	6.95676810286813	3.48167348976617e-12	6.8232469599356e-11
Cd81	2214.96505226803	1.29028146370744	0.167546529602321	7.70103365775451	1.34969930166972e-14	4.44976862521892e-13
Cd82	2177.83413206706	-0.225408425803865	0.106411236705926	-2.11827653527601	0.0341516546668236	0.0695241950795818
Cd83	729.498918942318	0.727081699950748	0.179396935248901	4.05292152255539	5.05819738307585e-05	0.00021711259913373
Cd84	5199.03299025137	0.319996593998967	0.151708272746211	2.10928902034421	0.0349196419442242	0.0708127125149954
Cd86	631.772046637164	1.33346825628867	0.223204914921593	5.9741885914882	2.31238179646535e-09	2.50873490590659e-08
Cd9	1768.45473885416	-0.053188131120372	0.172483277724157	-0.30836688531298	0.75780317671268	0.82833987512633
Cd93	7167.33279059166	1.47916756748048	0.182477510979515	8.10602665249272	5.23019769695317e-16	2.47451270737427e-14
Cd99l2	843.904825794813	-1.02503672268043	0.171731574699546	-5.9688308598683	2.38959669434772e-09	2.57916590037444e-08
Cdadc1	342.568426315673	-0.377301301976947	0.12615887606397	-2.99068376120942	0.00278353593667648	0.00781588571242157
Cdan1	335.721218269299	-0.0617546623461369	0.1562871136007	-0.39513598353294	0.692742534057906	0.777505109347966
Cdc123	403.202308940451	0.271788263206897	0.145181006662974	1.87206487579903	0.061197628622567	0.114048890302829
Cdc14a	113.490381342261	1.34073006321052	0.180515867549016	7.4272144682598	1.10908455204501e-13	2.96975086967796e-12
Cdc14b	259.723039651107	-0.580793110568793	0.167596738878354	-3.46542011769304	0.000529403772929872	0.00177496016836387
Cdc16	548.819348991301	-0.249876148608242	0.132056936386168	-1.89218495783925	0.0584663418291289	0.10983712672333
Cdc20	325.986645409619	1.03922491348706	0.262044549189457	3.96583297268171	7.31400689702371e-05	0.000302189024291016
Cdc23	317.123054669869	-0.15216029171805	0.123505912586165	-1.23200815679083	0.217946037166321	0.323296897423167
Cdc25a	313.194959594188	0.0149953358789769	0.186632859547957	0.0803467080518246	0.93596151061079	0.957726287587348
Cdc25b	449.327624970594	0.662089166020448	0.245874018402667	2.69279841083553	0.00708550961759695	0.017773796798377
Cdc25c	65.1961837692601	0.819586297264437	0.302375821201481	2.71048886781965	0.00671841037667538	0.0169849727984049
Cdc26	262.100652644814	-0.242312467463553	0.144871982184879	-1.67259717033709	0.094406624335864	0.164603403611367
Cdc27	1179.36110981982	-0.0067425458374661	0.0871280573271832	-0.0773866196987097	0.93831598479482	0.958909859463212
Cdc34	738.837082862938	0.02574217717911	0.101970713109666	0.252446770195921	0.800695753070464	0.859781387235772
Cdc37	1979.10965028667	0.115708477044319	0.0830698256533812	1.39290622237642	0.16364815056837	0.256764988767353
Cdc37l1	248.021778005045	-0.077263184112176	0.135475378373411	-0.570311631824459	0.568466353010369	0.675876150461548
Cdc40	463.784188725657	-0.138994792518905	0.122842689377357	-1.13148607559323	0.257850560872516	0.368839430391067
Cdc42	9880.36462178177	-0.122855713170835	0.0914208822749431	-1.34384738052903	0.178997744461179	0.276132215499379
Cdc42bpa	664.532807915434	-0.907334559482378	0.156666882034487	-5.79148922669341	6.97650348761259e-09	6.85396537014867e-08
Cdc42bpb	2065.16636469033	-0.163496434431421	0.136127796972799	-1.20105105692771	0.229731396639217	0.337162638682746
Cdc42bpg	540.843336874448	0.543116176810725	0.15519580014362	3.49955460333411	0.000466036144210051	0.00158558120434807
Cdc42ep2	528.927074888264	-0.530731032963352	0.165014323535104	-3.21627251255222	0.00129867448634869	0.0039843535862258
Cdc42ep3	227.817165582691	1.16346822669832	0.170833459672743	6.81054068053833	9.723261224877e-12	1.71142996524583e-10
Cdc42ep4	746.92859895525	0.132241388910121	0.141210081003328	0.93648688514671	0.349022561907881	0.467281802299008
Cdc42se1	1048.53936315305	1.2489710213485	0.190111146085481	6.56968855885447	5.04206088144079e-11	7.44769204142398e-10
Cdc42se2	2824.030370875	-0.0125596699822399	0.0984973820017029	-0.12751272903906	0.898534599103756	0.93262333440996
Cdc45	171.038619392138	0.672187860490143	0.343009985615107	1.959674320515	0.05003386848104	0.0963102225197137
Cdc5l	766.062026631	-0.222274875084112	0.117341718434031	-1.89425276918093	0.0581914668757578	0.109435088259326
Cdc6	135.009245428857	1.15632938440365	0.277310587567508	4.16979890507119	3.04868527085392e-05	0.000137469380629511
Cdc7	96.6035450917879	0.454793289603799	0.258195973371375	1.76142673204918	0.0781662038186583	0.140391276588813
Cdc73	958.717890368406	0.158268332294985	0.0984696313750893	1.60728064160321	0.107992818894584	0.183959072250723
Cdca2	267.486565644343	0.839998711070655	0.25333106069288	3.31581413180521	0.000913765806170321	0.00290397542188219
Cdca3	264.263583464123	0.616119514228487	0.250325603343551	2.46127246274092	0.0138445183269437	0.0318234270583719
Cdca4	284.208423583784	0.639546334695608	0.210109598509696	3.04387014792233	0.00233555926942021	0.00670155344406141
Cdca5	184.122075551465	1.04236810091242	0.262293286309667	3.97405559089219	7.06590598434562e-05	0.000293770818675222
Cdca7	67.3243450401937	0.320699727477093	0.325821978013575	0.984278990116901	0.324978356796294	0.441945906914178
Cdca7l	171.840340436016	1.52417144043253	0.200155760071452	7.61492669453244	2.63841166354165e-14	8.26086731023471e-13
Cdca8	340.952110714805	0.919619100602459	0.23063907664806	3.98726492478001	6.6839376582358e-05	0.000279738461685725
Cdh23	185.84066471744	-0.195548893072235	0.200502920777858	-0.975291992324087	0.329415441450398	0.446509578492823
Cdip1	505.458881747142	-0.165547982973577	0.117965253286064	-1.40336224745879	0.160508844737792	0.252689993873544
Cdipt	921.552235247074	0.0603713625970684	0.109628722966492	0.550689280723637	0.581846694040123	0.687610093678079
Cdk1	523.793614386935	0.811026793164196	0.238220803890804	3.40451706953334	0.000662811576637931	0.00217339335382709
Cdk10	131.294418128835	0.133987204349671	0.17435293946926	0.76848262356537	0.442200510152723	0.560319514727348
Cdk11b	663.861294369918	0.279665982894335	0.144946123866834	1.92944782125579	0.0536752918441491	0.102163271001001
Cdk12	1610.57428033908	0.259876123993257	0.106269456281569	2.44544512681702	0.0144673461981517	0.0330438388210052
Cdk13	1836.64288449722	-0.0530363499639772	0.0837911911108171	-0.632958539685092	0.526760718071326	0.63841329323263
Cdk14	2056.57349621796	1.03018270387665	0.140989809010849	7.30678842041252	2.73602856379695e-13	6.83192846733823e-12
Cdk16	886.333633722595	-0.647481910141137	0.116776274222899	-5.54463579566894	2.9456665108749e-08	2.50481169184869e-07
Cdk17	574.292007914437	0.258936828704372	0.103234596799734	2.50823693540148	0.0121335277169815	0.0283724352133429
Cdk18	3285.83556445637	-0.356145067771174	0.125898982479814	-2.82881609331733	0.00467205381140581	0.0122905094516183
Cdk19	629.082137051392	0.65791159416582	0.150983261696137	4.35751345397418	1.31548414622091e-05	6.41432312289427e-05
Cdk2	364.902473848418	0.0657382564521613	0.14978703214432	0.438878155946253	0.660749825446673	0.751449173436326
Cdk20	163.01280470394	0.973518634457444	0.201294417524771	4.83629226497374	1.32283380541267e-06	7.93889529857818e-06
Cdk2ap1	97.0877860578872	0.0285016911144666	0.227994707264009	0.125010319127552	0.90051538094588	0.933985995484086
Cdk2ap2	386.430838322724	-0.318181161922517	0.101716922986275	-3.12810447446831	0.00175937631306583	0.00520492498823071
Cdk4	1076.86643838488	0.1692768520873	0.122541023713747	1.3813892438399	0.16715931131296	0.261132231313583
Cdk5	324.581663557434	-0.336820609219069	0.155722176230406	-2.16295852891698	0.0305443694391037	0.0630682345186416
Cdk5r1	46.9882102209436	-0.335747434681352	0.322445791494475	-1.04125233926989	0.297758450223633	0.413140433460855
Cdk5rap1	132.322658414748	-0.570089765786346	0.217228849544812	-2.62437409663095	0.00868083803341338	0.0211844767598424
Cdk5rap2	941.796765494028	-0.240067340593846	0.146763000469865	-1.63574838225755	0.101892259053884	0.175347200901563
Cdk5rap3	256.391961458575	0.0354890565610097	0.15495395390284	0.229029693448559	0.818845837400882	0.873541990649326
Cdk6	5073.05352349564	0.126166115784118	0.0875972755150195	1.44029725858866	0.149783316687777	0.239431354721632
Cdk7	354.530545959599	-0.364726223032878	0.119957619257722	-3.04045899951786	0.0023621785101975	0.00677484424586041
Cdk8	703.355867052591	-0.611217529675526	0.127394762694755	-4.79782305603911	1.60399376725253e-06	9.47267084039092e-06
Cdk9	1109.34556067134	0.0868805681943532	0.106457355023355	0.816106770408611	0.414439071993531	0.532977286024789
Cdkal1	440.187612947053	0.128813212955776	0.122962238086581	1.04758350986646	0.29483053820939	0.4100389350608
Cdkl2	141.440896558904	0.49553368332179	0.18053607882022	2.74479032977806	0.00605495692794221	0.0154692718104248
Cdkl3	57.9230899268183	-0.536707231951992	0.285500028460437	-1.87988503835252	0.0601237474088596	0.112413810895929
Cdkl5	40.6416221759202	-0.891079678678651	0.294045537444396	-3.03041388222787	0.00244218821531426	0.00697570101900362
Cdkn1a	3365.82361024017	1.51539366318313	0.108058099213655	14.0238785820844	1.11358483867803e-44	2.8028930389526e-41
Cdkn1b	827.864258387589	-0.589869949863602	0.115476182854878	-5.10815248028164	3.25324077333191e-07	2.22269463259403e-06
Cdkn1c	34.083126520839	1.27131332930059	0.418698082455062	3.03634858284081	0.00239462347706683	0.00686037278061463
Cdkn2a	103.019002939209	1.34150932800897	0.237573970598014	5.64670163415697	1.63555316606234e-08	1.46710168174587e-07
Cdkn2aip	146.057758356903	-0.148243844687887	0.234383102122897	-0.63248520625073	0.527069872287188	0.638711497769603
Cdkn2aipnl	414.645898014307	0.274396144689154	0.155846832733161	1.76067835243704	0.0782928587129869	0.140578631317298
Cdkn2b	270.968756359308	-1.05928798344286	0.152725222019545	-6.93590730748648	4.03622194832969e-12	7.77884429092331e-11
Cdkn2c	578.540176034641	-0.207190426625488	0.169604276831318	-1.22161086086026	0.221854819502337	0.327819995707047
Cdkn2d	151.210358255541	0.776996523497987	0.208844352747919	3.72045742810122	0.000198862263187002	0.000738921374488304
Cdkn3	84.5351038208145	0.195344068672659	0.33286483758964	0.586857026074596	0.557299733617627	0.666440245873986
Cdon	233.838724129893	-1.92240929952015	0.242727729702577	-7.92002340184103	2.3746588304079e-15	9.60935092626477e-14
Cdpf1	75.5852289033006	-0.978141562960341	0.234958509664208	-4.16303952709888	3.14038978293449e-05	0.000140998235527044
Cdr2	136.545069451086	0.589741733881429	0.172940708650095	3.41008047489057	0.000649437135035698	0.00213342895965133
Cds1	291.410665713549	0.178035834352194	0.126119543523332	1.41164350407958	0.158054956013277	0.249764141314301
Cds2	2236.21276613226	0.368369795174555	0.127362667458867	2.8922902018641	0.00382444510375675	0.0103041407901474
Cdt1	937.662368355462	-0.192362766603664	0.16080002956007	-1.19628564204836	0.231585109826981	0.3392897097989
Cdv3	2434.83561760489	-0.235759276135509	0.0946995678306565	-2.48954965198044	0.0127905051365181	0.0297373927846075
Cdyl	391.91476199827	0.343654109495089	0.108258709862605	3.17437839349123	0.00150157796521581	0.00453500328587496
Cdyl2	223.776872193481	0.574845345874537	0.143126006027184	4.01635846503924	5.91043329550487e-05	0.000250194426585701
Ceacam1	279.13652496903	0.269405488891612	0.165957127037435	1.62334389429893	0.104515911188175	0.178932491130891
Ceacam16	94.0981233602417	-0.0651175957065069	0.205368169543674	-0.317077353570407	0.75118490818848	0.823992161557747
Ceacam19	47.3929885384693	1.20912539762595	0.302637925884855	3.99528708799698	6.46159044567864e-05	0.000271606933062344
Cebpa	825.797693946587	1.49262842610092	0.164041173305321	9.09910844957668	9.10763660340292e-20	1.02338934512344e-17
Cebpb	1514.00560759533	1.30550629537674	0.174844927630844	7.46665238200732	8.22607010377696e-14	2.27028711087792e-12
Cebpd	260.951648156992	0.412418219132525	0.167765542220872	2.45830111280871	0.0139596074298015	0.0320353135492435
Cebpe	36.2423105593861	1.07869937489049	0.339345577186908	3.178763618588	0.00147904655174169	0.00447554721175023
Cebpg	523.546777113048	0.0701252954372636	0.110882931132764	0.632426422361616	0.527108273010338	0.638711497769603
Cebpz	584.271430933925	-0.053961873991834	0.118465564946206	-0.45550683032945	0.648744654793251	0.742225281393456
Cecr2	100.612636491636	-0.356430365124718	0.217094349033684	-1.64182239985167	0.100626815466315	0.173549194551676
Cecr5	96.4370985336599	-0.191441824528774	0.184249798114533	-1.03903410743371	0.298788873957707	0.414216565185915
Celf1	1801.48148744316	-0.401264555651553	0.0967697281041755	-4.1465917442651	3.37460996399739e-05	0.000150440901158013
Celf2	2385.72841029883	1.32314398487144	0.180975501024202	7.31117735485363	2.6481172966792e-13	6.62555788841107e-12
Celf3	79.428464182068	0.231176222490974	0.200923993940629	1.15056553454379	0.249911018866857	0.359937076269099
Celsr1	85.4553916395482	-1.2183028449997	0.377293473562729	-3.22905889014045	0.00124198316690267	0.0038272179616724
Celsr3	147.412318843764	0.453795824040185	0.17399981663001	2.60802472571065	0.00910663761056981	0.0220525369114914
Cenpa	747.340203565607	0.504508755521548	0.280697707223709	1.79733835559785	0.072281920590455	0.131759555421622
Cenpb	3358.78566329126	0.470456179739566	0.115762328952591	4.06398337003253	4.82422645140174e-05	0.000208134692803877
Cenpc1	362.188351195625	0.347334569092942	0.144260655287692	2.40768744880765	0.0160539184111947	0.0361363912010168
Cenpe	763.096295467065	0.47957351652331	0.253799654901659	1.88957513243717	0.0588148056141347	0.110277760526503
Cenpf	759.069798595894	0.909930309022453	0.247087081412201	3.68263004209624	0.00023084004544602	0.00084672747651943
Cenph	55.5057419683293	0.78406827938234	0.297855194533513	2.63238074665883	0.00847887832329572	0.0207825548383784
Cenpi	214.586658633808	0.457481533935103	0.257920269293583	1.77373238322098	0.0761074272529384	0.13728134900075
Cenpj	115.467095825524	0.706461450480994	0.192690852473526	3.66629469646492	0.00024609031642935	0.000896395552029919
Cenpk	54.4481027525554	0.487866676853822	0.305421992623913	1.5973528057443	0.110187086130362	0.186786702444855
Cenpl	252.958110771487	0.212688714369694	0.189395346102523	1.12298807096644	0.261442560828674	0.373002451879476
Cenpm	34.2721623579982	1.64849202057012	0.381337737417232	4.32291865928407	1.53978514937873e-05	7.3894143740302e-05
Cenpn	142.794361161317	0.823107278248861	0.253943871864144	3.24129608722833	0.00118987526766413	0.00368469002055931
Cenpo	176.645986090439	0.133679336491465	0.184027683190288	0.7264088433545	0.467588171490942	0.584695097713813
Cenpp	48.5780378793194	0.301259068362767	0.300372244655822	1.00295241562003	0.31588382076678	0.432343434948334
Cenpq	94.5295099728438	0.289882350414947	0.308223799644254	0.940493079215569	0.346964697962915	0.464971858573452
Cenpt	131.414877836665	0.244884146044997	0.161470528276986	1.51658725996687	0.129370923948679	0.212911347965754
Cenpu	77.5871226554003	1.25537902440418	0.311024620307434	4.03626897177238	5.43079520554591e-05	0.000231604736231092
Cenpv	58.2553556704533	-0.440412069600813	0.28189749490407	-1.56231281782297	0.118214313874679	0.19757332538019
Cenpw	50.6980617051314	0.175398962450322	0.304937291452802	0.575196826910459	0.565158188536466	0.673081101558596
Cep104	421.73081473291	-0.0950086949363863	0.11285348803481	-0.841876459388481	0.399857108329986	0.518736120617338
Cep120	600.113468341032	0.266744587692253	0.104445780240885	2.55390487846473	0.0106522352884298	0.0252776938314089
Cep128	554.049507510347	0.306099888421069	0.18958535608709	1.61457559137878	0.106402634814561	0.181643673242166
Cep131	113.602232363776	0.310658737218569	0.20321860893408	1.52869237147146	0.126340724340518	0.208990275476527
Cep135	332.329161106743	0.0523627273384762	0.1590751995674	0.32916964731696	0.742027463626334	0.816592724991999
Cep152	545.720499942534	0.785850526364768	0.207756722396203	3.7825516175891	0.000155228889814646	0.000591807203367863
Cep162	345.507854605186	0.490144748429123	0.124586918088561	3.9341590268788	8.34884953942924e-05	0.000340143319694778
Cep164	448.747025826771	0.506143142827285	0.143583993311273	3.52506662584614	0.000423376293406726	0.00145578979577149
Cep170	1740.11826055203	0.286865951206803	0.0822708262213676	3.48684903728726	0.000488747157321035	0.00165479767954943
Cep170b	621.704748991868	-0.124209301647658	0.149550162590664	-0.830552769023946	0.406226325849245	0.525064939965449
Cep19	37.4381366898324	0.217291564857671	0.33591651251642	0.646861814651191	0.517721381394439	0.630371863859232
Cep192	1265.57569718517	0.533091458150801	0.144249858688082	3.69561164911453	0.000219358056032469	0.000808381005905894
Cep250	762.108570086033	0.273038876957899	0.124663944776622	2.19019923881873	0.0285097904295302	0.0595412732418914
Cep290	151.044470323458	-0.181607260633061	0.215664466719072	-0.842082441284244	0.399741808929262	0.518687562158445
Cep295	441.487731771287	0.18067925831886	0.216039661170253	0.836324484773527	0.402972382352698	0.521696063358575
Cep350	3217.9343201281	-0.0166528796677507	0.0799544926315871	-0.208279473981326	0.835010757601054	0.885606808057413
Cep41	55.3349954564487	-0.263826040092016	0.275858775001489	-0.956380815113065	0.33887987372379	0.456617046125685
Cep44	132.39450083039	0.223971267685732	0.183499566231756	1.2205547527173	0.222254646891465	0.328179600038611
Cep55	206.684529847917	0.884370944472309	0.215584187215404	4.10220691923327	4.0922804710462e-05	0.000179365621982991
Cep57	575.809576320521	-0.432580274240688	0.116328259141408	-3.71861727694941	0.000200316286473959	0.000743871485770072
Cep57l1	92.0518721622233	-0.00159964718497641	0.215207003431246	-0.00743306286260089	0.994069328514522	0.996285936079897
Cep63	229.854383130128	0.118601711657595	0.183888974556052	0.644963690422034	0.518950716020547	0.631318971591936
Cep68	509.088025176465	0.0427843134156178	0.123503442945522	0.346422029987376	0.729025571356048	0.807071324376835
Cep70	379.273686712053	-0.488072438665968	0.119050287477547	-4.09971659041999	4.13656384486455e-05	0.000181073586043897
Cep72	55.5792061434603	-0.261946520313038	0.297181784542123	-0.881435316490298	0.378082249616779	0.497455840191026
Cep76	167.707603145773	-0.284541562157651	0.17176271428754	-1.65659679598049	0.0976010205715652	0.169445281265436
Cep78	145.682645523321	0.603653393883787	0.199479951409133	3.0261356573408	0.0024770114314358	0.00706554598019483
Cep83	525.860641026517	-0.225214246172517	0.108066657375963	-2.08403083468195	0.0371573625869325	0.0746290150265792
Cep83os	127.825035657729	-0.139818889553248	0.230777078284768	-0.605861251873193	0.544606891720097	0.654995960655334
Cep85	600.258201638103	-0.336501318929338	0.17765589038736	-1.89411855804855	0.0582092749713051	0.109435871752894
Cep85l	146.868882849552	0.373565683772437	0.173468773991346	2.1535039141458	0.0312790968094196	0.0644162057513575
Cep89	117.749564717014	0.468615865281061	0.234433178884699	1.99893149728409	0.045615766233705	0.0890887725660418
Cep95	142.265630150462	-0.408811964786648	0.165327930147763	-2.4727338231433	0.0134083968053025	0.0309964499990324
Cept1	714.137327827978	0.222733712588566	0.120636416494435	1.84632235489888	0.0648454137137611	0.119941142208654
Cercam	77.0883279929841	1.27229023905231	0.225970068199127	5.63034852001352	1.79845834439619e-08	1.60067880227907e-07
Cerk	2993.792011407	0.56250268153394	0.12083494592908	4.65513248016913	3.23772455607849e-06	1.79264247858547e-05
Cers2	2184.43963243752	0.104228426928676	0.0976847795094518	1.06698737973393	0.285977534850635	0.400604104641056
Cers5	698.710490829227	0.554898755840755	0.114671741402963	4.83901917814967	1.3048145673029e-06	7.83822975155465e-06
Cers6	2814.50894359904	0.328100214339932	0.0838257851654331	3.91407266502085	9.07523051333657e-05	0.000366298191181336
Cetn2	210.962383581266	-0.310004751810798	0.17214992401065	-1.80078355301289	0.0717370021780501	0.130861019337695
Cetn3	253.236274692419	-0.080540003040044	0.158045677233436	-0.509599531286675	0.610332052316148	0.711008875164188
Cfap157	37.9485342010951	0.566645838056437	0.292480264076727	1.9373814498054	0.0526987324868454	0.100624115968282
Cfap20	375.631440590012	0.179266289083067	0.128602889311427	1.39395226688066	0.163332019357655	0.256428825301408
Cfap36	112.995933784798	0.385227848747801	0.221640444175431	1.73807560339884	0.0821974930358346	0.146544191791469
Cfap43	199.410160216021	0.899819684038062	0.232902074826692	3.86351081117521	0.000111768944228521	0.000440667970900983
Cfap45	65.4137813185199	-0.755718633534538	0.236228107829494	-3.19910547681314	0.00137854723001798	0.00420174785414779
Cfap97	238.646740944353	-0.107562749329533	0.130874286692736	-0.821878399857618	0.411146107555962	0.529933814378511
Cfdp1	384.231711331625	-0.249639902746321	0.171783674121264	-1.45322251385832	0.1461619831362	0.23480323688653
Cfh	249.633263074524	0.676133969305019	0.256371611504356	2.63731996431879	0.00835639697995877	0.0205200499498109
Cfl1	9395.2183226123	0.00900569781772599	0.119768332263638	0.0751926460652587	0.940061435381399	0.959970234037237
Cfl2	321.202348491703	-0.710859290878597	0.149557920518753	-4.75307017116129	2.00350773345326e-06	1.15927102646019e-05
Cflar	2975.19370865768	0.7813292758812	0.159972159929665	4.8841578198652	1.03871855316556e-06	6.41111966237794e-06
Cfp	6735.41797199053	0.695688268822396	0.134308049546648	5.17979578417428	2.22128940138206e-07	1.57848261526783e-06
Cggbp1	1827.06922876398	0.114856036222884	0.0825371493937387	1.39156776150543	0.164053326926945	0.257191904866529
Cgnl1	2536.12325758234	-0.501635418043491	0.127883640439732	-3.92259257179887	8.76012181010937e-05	0.000354831454715888
Cgrrf1	267.885050911386	-0.198596625822962	0.121522855060277	-1.63423271881208	0.10220999487847	0.175797838669611
CH25-588N10.2	34.8648390352143	-0.834057387419633	0.28781857627024	-2.8978580820875	0.00375720561343612	0.010140345838536
Ch25h	34.6409454685596	1.73664457485913	0.3902580712606	4.44999015459044	8.58742260342013e-06	4.35777070419526e-05
Chac1	47.3037342786975	-1.25942119842493	0.406153835797909	-3.10084772670124	0.00192967495901656	0.00566082968746466
Chac2	37.2407455616316	-0.208342830432454	0.317055310801336	-0.65711824825101	0.511104886193764	0.624551412054425
Chaf1a	374.780166465787	0.168561929213774	0.229682495043102	0.733891057662629	0.463015137572085	0.580556491615491
Chaf1b	660.501879102659	-0.301110372490428	0.132436724866592	-2.27361687472827	0.0229890319721842	0.0495320950813112
Champ1	374.79629139031	-0.0668179901826317	0.12284711237109	-0.543911768807323	0.586502189937537	0.691181764244208
Chchd1	189.811372969878	-0.205685787548392	0.1408127365954	-1.46070442576081	0.144096573968028	0.232226326467875
Chchd10	629.753961038271	-1.36785794499122	0.224936854930459	-6.08107526627464	1.19379233544305e-09	1.37110703035224e-08
Chchd2	1119.69771859795	-0.584161368718764	0.122099223486898	-4.78431682066716	1.7156988210248e-06	1.00428230988824e-05
Chchd3	1059.46475830271	-1.01117471202994	0.143887716785352	-7.0275262866141	2.10227212773784e-12	4.28802183591259e-11
Chchd4	322.779368687633	-0.541328941670883	0.154269086916828	-3.50899167480476	0.000449808984353113	0.00153702038231983
Chchd5	94.2811568004242	-0.602491206555265	0.188958133290996	-3.18849046644331	0.0014301772585235	0.00434438348986682
Chchd6	76.0504469797775	0.554728162883045	0.246780802761358	2.24785784257083	0.0245852561031106	0.0525128051693223
[truncated: 10,587 more rows]
